# Supplementary material for: 2,3-Dimethoxyindolines: a latent electrophile for SNAr reactions triggered by indium catalysts
Source: Royal Society of Chemistry journal article supplement (doi:10.1039/d0cc01210f), 2020-01-01

# 2,3-Dimethoxyindolines: A Latent Electrophile for S<sub>N</sub>Ar Reactions Triggered by Indium-Catalyst

Seiya Hirao,<sup>†</sup> Toshiki Yamashiro,<sup>†</sup> Kyouka Kohira, Naoki Mishima, and Takumi Abe\*

Faculty of Pharmaceutical Sciences, Health Sciences University of Hokkaido,

Ishikari-tobetsu, Hokkaido 0610293, Japan

E-mail: [abe-t@hoku-iryo-u.ac.jp](mailto:abe-t@hoku-iryo-u.ac.jp)

<sup>†</sup>S.H. and T.Y. contributed equally.

## SUPPORTING INFORMATION

### Contents

|                                                                  |         |
|------------------------------------------------------------------|---------|
| 1. General Experimental-----                                     | S2      |
| 2. Experimental Procedure-----                                   | S2–22   |
| 3. Supplementary References-----                                 | S22     |
| 4. Copies of <sup>1</sup> H and <sup>13</sup> C NMR spectra----- | S23–112 |

## Experimental Section

### 1. General Experimental

Melting points were recorded with a Yanaco MP3 or Yamato MP-21 and are uncorrected. High-resolution MS spectra were recorded with a JEOL JMS-T100LP mass spectrometers. IR spectra were measured with a Shimadzu IR Affinity-1 spectrometer. The NMR experiments were performed with a JEOL JNM-ECA500 (500 MHz) spectrometer, and chemical shifts are expressed in ppm ( $\delta$ ) using residual solvent as an internal reference ( $\text{CDCl}_3$ ,  $^1\text{H}$  NMR:  $\delta$  7.25,  $^{13}\text{C}$  NMR:  $\delta$  77.1). The following abbreviations were used to explain NMR peak multiplicities: s = singlet, d = doublet, t = triplet, q = quartet, m = multiplet, dd = doublet of doublets, ddd = doublet of doublet of doublets, br = broad. Flash column chromatography was performed on silica gel (Silica Gel 60N, Kanto Chemical Co., Ltd.). The N-protected indoles **1a–1j** were prepared by reported methods.<sup>S1</sup>

### 2. Experimental Procedure

#### Bromomethoxylation of indoles with NBS and MeOH (Scheme 3)

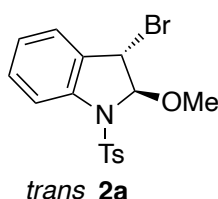

#### *trans*-3-Bromo-2-methoxy-1-tosylindoline (**2a**)

To a solution of N-Ts indole **1a** (13.565 g, 50 mmol) in MeOH (500 mL) was added NBS (9.79 g, 55 mmol). The mixture was stirred at room temperature for 10 min. The resulting precipitate was separated by filtration, washed with MeOH, and dried *in vacuo* to give **2a**.

16.36 g, 86% yield. colorless solid;  $>300$  °C (decomp.); IR ( $\text{CHCl}_3$ ): 3019, 1223, 1207  $\text{cm}^{-1}$ ;  $^1\text{H}$  NMR (500 MHz,  $\text{CDCl}_3$ )  $\delta$ : 7.69 (d,  $J$  = 8.6 Hz, 2H), 7.65 (d,  $J$  = 8.6 Hz, 1H), 7.32 (ddd,  $J$  = 1.2, 8.0, 8.0 Hz, 1H), 7.26 (d,  $J$  = 8.0 Hz, 1H), 7.17 (d,  $J$  = 8.1 Hz, 2H), 7.09 (ddd,  $J$  = 1.2, 7.5, 7.5 Hz, 1H), 5.59 (s, 1H), 4.94 (s, 1H), 3.59 (s, 3H), 2.32 (s, 3H);  $^{13}\text{C}$  NMR (125 MHz,  $\text{CDCl}_3$ )  $\delta$ : 144.6, 140.6, 135.3, 131.4, 130.6, 129.6, 127.8, 126.3, 125.4, 117.0, 99.9, 56.4, 47.3, 21.7; HRMS (ESI)  $m/z$ : 403.9931, 405.9912 (Calcd for  $\text{C}_{16}\text{H}_{16}\text{BrNO}_3\text{SNa}$   $[\text{M}+\text{Na}]^+$ : 403.9932, 405.9912).

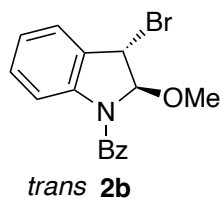

#### *trans*-3-Bromo-2-methoxy-1-benzoylindoline (**2b**)

To a solution of N-Bz indole **1b** (1.01 g, 4.6 mmol) in MeOH (46 mL) was added NBS (890 mg, 5 mmol). The mixture was stirred at room temperature for 10 min. The resulting precipitate was separated by filtration, washed

with MeOH, and dried *in vacuo* to give **2b**.

1.05 g, 69% yield. colorless solid; >300 °C (decomp.); IR (CHCl<sub>3</sub>): 3014, 1683, 1101, 1086 cm<sup>-1</sup>; <sup>1</sup>H NMR (500 MHz, CDCl<sub>3</sub>) δ: 7.64 (d, *J* = 7.5 Hz, 2H), 7.54–7.51 (m, 1H), 7.487.42 (m, 3H), 7.27 (br s, 1H), 7.13 (t, *J* = 7.5 Hz, 1H), 5.55 (br s, 1H), 5.14 (s, 1H), 3.28 (br s, 3H) (one proton was disappeared.); <sup>13</sup>C NMR (125 MHz, CDCl<sub>3</sub>) δ: 170.0, 142.0, 135.5, 131.0, 130.6, 130.4, 128.7, 127.7, 126.0, 125.1, 117.9, 98.3, 55.6, 46.9; HRMS (ESI) *m/z*: 354.0104, 356.0083 (Calcd for C<sub>16</sub>H<sub>14</sub>BrNO<sub>2</sub>Na [M+Na]<sup>+</sup>: 354.0106, 356.0085).

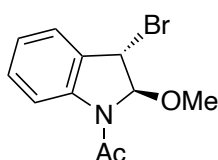

*trans* **2d**

#### *trans*-3-Bromo-2-methoxy-1-acetylindoline (**2d**)

To a solution of N-Ac indole **1d** (796 mg, 5 mmol) in MeOH (50 mL) was added NBS (979 mg, 5.5 mmol). The mixture was stirred at room temperature for 2 h. After addition of H<sub>2</sub>O, the whole was extracted with AcOEt (3 x 25 mL), washed with brine (25 mL). The organic layer was dried over MgSO<sub>4</sub> and concentrated *in vacuo*. The residue was purified by silica gel column chromatography (AcOEt/hexane = 1/8–1/5) to give **2d**.

686 mg, 51% yield. colorless solid; mp 216–221 °C; IR (CHCl<sub>3</sub>): 3019, 1717, 1223, 1207 cm<sup>-1</sup>; <sup>1</sup>H NMR (500 MHz, CDCl<sub>3</sub>) δ: 8.16 (d, *J* = 8.0 Hz, 1H), 7.39 (d, *J* = 7.5 Hz, 1H), 7.33 (ddd, *J* = 1.2, 8.0, 8.0 Hz, 1H), 7.12 (t, *J* = 7.5 Hz, 1H), 5.60 (s, 1H), 5.29 (s, 1H), 3.38 (s, 3H), 2.35 (s, 3H); <sup>13</sup>C NMR (125 MHz, CDCl<sub>3</sub>) δ: 169.6, 142.3, 130.8, 129.0, 125.8, 124.8, 117.2, 98.2, 53.8, 46.8; HRMS (ESI) *m/z*: 291.9947, 293.9928 (Calcd for C<sub>11</sub>H<sub>12</sub>BrNO<sub>2</sub>Na [M+Na]<sup>+</sup>: 291.9949, 293.9929).

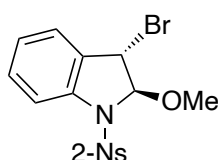

*trans* **2e**

#### *trans*-3-Bromo-2-methoxy-1-(2-nitrobenzenesulfonyl)indoline (**2e**)

To a solution of N-Ns indole **1e** (907 mg, 3 mmol) in MeOH (30 mL) was added NBS (587 mg, 3.3 mmol). The mixture was stirred at room temperature for 0.5 h. After addition of H<sub>2</sub>O, the whole was extracted with AcOEt (3 x 150 mL), washed with brine (100 mL). The organic layer was dried over MgSO<sub>4</sub> and concentrated *in vacuo*. The residue was recrystallized from CHCl<sub>3</sub>/MeOH and the resulting precipitate was separated by filtration, washed with MeOH, and dried *in vacuo* to give **2e**.

786 mg, 64% yield. colorless solid; >300 °C (decomp.); IR (CHCl<sub>3</sub>): 3019, 1223, 1207 cm<sup>-1</sup>; <sup>1</sup>H NMR (500 MHz, CDCl<sub>3</sub>) δ: 7.76 (dd, *J* = 1.2, 8.0, 8.0 Hz, 1H), 7.68 (d, *J* = 8.0 Hz, 1H), 7.64 (ddd, *J* = 1.2, 8.0, 8.0 Hz, 1H), 7.54 (dd, *J* = 1.2, 8.0 Hz, 1H), 7.49 (ddd, *J* = 1.7, 7.4, 7.4 Hz, 1H), 7.39 (ddd, *J* = 1.1, 8.0, 8.0 Hz, 1H), 7.35 (d, *J* = 7.5 Hz, 1H), 7.20 (dd, *J* = 1.2, 7.4 Hz, 1H), 5.84 (s, 1H), 4.99 (s, 1H), 3.57 (s, 3H); <sup>13</sup>C NMR (125 MHz, CDCl<sub>3</sub>) δ: 148.6,

140.1, 134.5, 131.7, 131.5, 131.3, 130.9, 129.8, 126.4, 126.2, 124.0, 117.5, 98.9, 57.0, 47.1; HRMS (ESI)  $m/z$ : 434.9625, 436.9605 (Calcd for  $C_{15}H_{13}BrN_2O_5Na$   $[M+Na]^+$ : 434.9626, 436.9606).

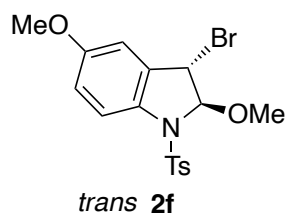

#### ***trans*-3-Bromo-2,5-dimethoxy-1-tosylindoline (2f)**

To a solution of 5-MeO-N-Ts indole **1f** (6.03 g, 20 mmol) in MeOH (200 mL) was added NBS (3.92 g, 22 mmol). The mixture was stirred at room temperature for 0.5 h. The resulting precipitate was separated by filtration, washed with MeOH, and dried *in vacuo* to give **2f**.

7.03 g, 85% yield. colorless solid; 298–300 °C (decomp.); IR (CHCl<sub>3</sub>): 3019, 1223, 1207 cm<sup>-1</sup>; <sup>1</sup>H NMR (500 MHz, CDCl<sub>3</sub>)  $\delta$ : 7.64 (d,  $J$  = 8.0 Hz, 2H), 7.60 (d,  $J$  = 9.2 Hz, 1H), 7.18 (d,  $J$  = 8.0 Hz, 2H), 6.89 (dd,  $J$  = 2.3, 8.6 Hz, 1H), 6.76 (d,  $J$  = 2.3 Hz, 1H), 5.52 (s, 1H), 4.85 (s, 1H), 3.76 (s, 3H), 3.59 (s, 3H), 2.33 (s, 3H); <sup>13</sup>C NMR (125 MHz, CDCl<sub>3</sub>)  $\delta$ : 157.7, 144.5, 135.2, 134.1, 132.8, 129.6, 127.8, 118.5, 117.0, 110.7, 100.2, 56.4, 55.8, 47.6, 21.6; HRMS (ESI)  $m/z$ : 434.0036, 436.0016 (Calcd for  $C_{17}H_{18}BrNO_4SNa$   $[M+Na]^+$ : 434.0038, 436.0017).

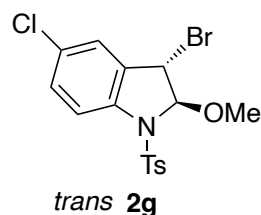

#### ***trans*-3-Bromo-5-chloro-2-methoxy-1-tosylindoline (2g)**

To a solution of 5-Cl-N-Ts indole **1g** (2.75 g, 9 mmol) in MeOH (90 mL) was added NBS (1.75 g, 9.9 mmol). The mixture was stirred at room temperature for 10 min. The resulting precipitate was separated by filtration, washed with MeOH, and dried *in vacuo* to give **2g**.

2.11 g, 56% yield. colorless solid; >300 °C (decomp.); IR (CHCl<sub>3</sub>): 3019, 1223, 1207 cm<sup>-1</sup>; <sup>1</sup>H NMR (500 MHz, CDCl<sub>3</sub>)  $\delta$ : 7.66 (d,  $J$  = 8.7 Hz, 2H), 7.59 (d,  $J$  = 9.2 Hz, 1H), 7.28 (dd,  $J$  = 1.7, 8.6 Hz, 1H), 7.23 (d,  $J$  = 2.3 Hz, 1H), 7.20 (d,  $J$  = 8.0 Hz, 2H), 5.55 (s, 1H), 4.85 (s, 1H), 3.59 (s, 3H), 2.35 (s, 3H); <sup>13</sup>C NMR (125 MHz, CDCl<sub>3</sub>)  $\delta$ : 144.9, 139.2, 135.0, 133.2, 130.7, 130.6, 129.7, 127.8, 126.3, 118.1, 100.2, 56.5, 46.1, 21.7; HRMS (ESI)  $m/z$ : 437.9544, 439.9515, 439.9524, 441.9496 (Calcd for  $C_{16}H_{15}BrClNO_3SNa$   $[M+Na]^+$ : 437.9542, 439.9513, 439.9522, 441.9492).

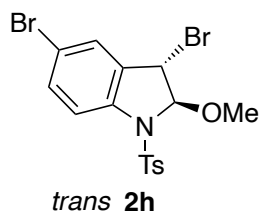



#### ***trans*-3,5-dibromo-2-methoxy-1-tosylindoline (2h)**

To a solution of 5-Br-N-Ts indole **1h** (3.5 g, 10 mmol) in MeOH (100 mL) was added NBS (1.96 g, 11 mmol). The mixture was stirred at room temperature for 1.5 h. The resulting precipitate was separated by filtration, washed with MeOH, and dried *in vacuo* to give **2h**.

4.18 g, 91% yield. colorless solid; >300 °C (decomp.); IR (CHCl<sub>3</sub>): 3019, 1223, 1207 cm<sup>-1</sup>; <sup>1</sup>H NMR (500 MHz, CDCl<sub>3</sub>) δ: 7.67 (d, *J* = 8.6 Hz, 2H), 7.53 (d, *J* = 8.6 Hz, 1H), 7.43 (dd, *J* = 2.3, 8.6 Hz, 1H), 7.38 (d, *J* = 2.3 Hz, 1H), 7.21 (d, *J* = 8.0 Hz, 2H), 5.54 (s, 1H), 4.85 (s, 1H), 3.58 (s, 3H), 2.35 (s, 3H); <sup>13</sup>C NMR (125 MHz, CDCl<sub>3</sub>) δ: 144.9, 139.7, 135.0, 133.6, 129.7, 129.3, 127.8, 118.5, 118.0, 100.1, 56.5, 46.0, 21.7; HRMS (ESI) *m/z*: 481.9039, 483.9017, 485.8994 (Calcd for C<sub>16</sub>H<sub>15</sub>Br<sub>2</sub>NO<sub>3</sub>SNa [M+Na]<sup>+</sup>: 481.9037, 483.9017, 485.8996).

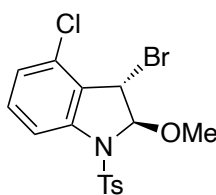

*trans* **2i**

#### ***trans*-3-Bromo-4-chloro-2-methoxy-1-tosylindoline (2i)**

To a solution of 4-Cl-N-Ts indole **1i** (3.06 g, 10 mmol) in MeOH (100 mL) was added NBS (1.96 g, 11 mmol). The mixture was stirred at room temperature for 1 h. The resulting precipitate was separated by filtration, washed with MeOH, and dried *in vacuo* to give **2i**.

3.52 g, 85% yield. colorless solid; mp >300 °C (decomp.); IR (CHCl<sub>3</sub>): 3019, 1223, 1207 cm<sup>-1</sup>; <sup>1</sup>H NMR (500 MHz, CDCl<sub>3</sub>) δ: 7.70 (d, *J* = 8.6 Hz, 2H), 7.56 (d, *J* = 8.6 Hz, 1H), 7.28 (t, *J* = 8.6 Hz, 1H), 7.20 (d, *J* = 8.0 Hz, 2H), 7.05 (d, *J* = 9.2 Hz, 1H), 5.60 (s, 1H), 4.95 (s, 1H), 3.60 (s, 3H), 2.34 (s, 3H); <sup>13</sup>C NMR (125 MHz, CDCl<sub>3</sub>) δ: 144.9, 141.9, 135.1, 132.1, 132.0, 129.7, 129.4, 127.8, 125.5, 115.1, 99.9, 56.5, 45.9, 21.7; HRMS (ESI) *m/z*: 437.9543, 439.9510, 439.9524, 441.9496 (Calcd for C<sub>16</sub>H<sub>15</sub>BrClNO<sub>3</sub>SNa [M+Na]<sup>+</sup>: 437.9542, 439.9513, 439.9522, 441.9492).

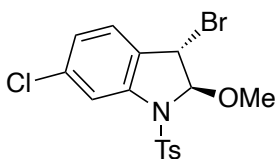

*trans* **2j**

#### ***trans*-3-Bromo-6-chloro-2-methoxy-1-tosylindoline (2g)**

To a solution of 6-Cl-N-Ts indole **1j** (915 mg, 3 mmol) in MeOH (30 mL) was added NBS (587 mg, 3.3 mmol). The mixture was stirred at room temperature for 2 h. After addition of H<sub>2</sub>O, the whole was extracted with AcOEt (3 x 50 mL), washed with brine (50 mL). The organic layer was dried over MgSO<sub>4</sub> and concentrated *in vacuo*. The residue was recrystallized from MeOH and the resulting precipitate was separated by filtration, washed with MeOH, and dried *in vacuo* to give **2j**.

976 mg, 78% yield. colorless solid; mp 272–275 °C; IR (CHCl<sub>3</sub>): IR (CHCl<sub>3</sub>): 3019, 1223, 1207 cm<sup>-1</sup>; <sup>1</sup>H NMR (500 MHz, CDCl<sub>3</sub>) δ: 7.71 (d, *J* = 8.6 Hz, 2H), 7.66 (d, *J* = 1.7 Hz, 1H), 7.22 (d, *J* = 8.6 Hz, 2H), 7.18 (d, *J* = 8.0 Hz, 1H),

7.07 (dd,  $J = 1.7, 8.0$  Hz, 1H), 5.57 (s, 1H), 4.89 (s, 1H), 3.59 (s, 3H), 2.36 (s, 3H);  $^{13}\text{C}$  NMR (125 MHz,  $\text{CDCl}_3$ )  $\delta$ : 145.0, 141.7, 136.6, 135.1, 130.0, 129.8, 127.8, 127.0, 125.6, 117.3, 100.4, 56.5, 46.5, 21.7; HRMS (ESI)  $m/z$ : 437.9541, 439.9514, 439.9525, 441.9493 (Calcd for  $\text{C}_{16}\text{H}_{15}\text{BrClNO}_3\text{SNa}$   $[\text{M}+\text{Na}]^+$ : 437.9542, 439.9513, 439.9522, 441.9492).

### Synthesis of 2,3-dimethoxyindolines using MeOH (Scheme 3)

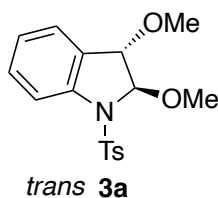

#### *trans*-2,3-dimethoxy-1-tosylindoline (**3a**)

A solution of **2i** (17.3 g, 45.2 mmol) in MeOH (700 mL) was stirred at 100 °C for 20 h. After addition of  $\text{H}_2\text{O}$ , the whole was extracted with AcOEt (3 x 400 mL), washed with brine (300 mL). The organic layer was dried over  $\text{MgSO}_4$  and concentrated *in vacuo*. The residue was recrystallized from MeOH and the resulting precipitate was separated by filtration, washed with MeOH, and dried *in vacuo* to give **3a**.

8.74 g, 58% yield. colorless solid; mp 250–251 °C; IR ( $\text{CHCl}_3$ ): 3019, 1223, 1207  $\text{cm}^{-1}$ ;  $^1\text{H}$  NMR (500 MHz,  $\text{CDCl}_3$ )  $\delta$ : 7.62 (d,  $J = 8.0$  Hz, 1H), 7.58 (d,  $J = 8.6$  Hz, 2H), 7.33 (ddd,  $J = 1.2, 7.5, 7.5$  Hz, 1H), 7.27 (t,  $J = 9.2$  Hz, 1H), 7.13 (d,  $J = 8.6$  Hz, 2H), 7.07 (t,  $J = 7.5$  Hz, 1H), 5.33 (s, 1H), 4.25 (s, 1H), 3.59 (s, 3H), 3.17 (s, 3H), 2.31 (s, 3H);  $^{13}\text{C}$  NMR (125 MHz,  $\text{CDCl}_3$ )  $\delta$ : 144.1, 141.9, 135.2, 130.6, 130.4, 129.3, 127.6, 126.8, 124.8, 117.4, 96.4, 83.9, 56.2, 56.0, 21.6; HRMS (ESI)  $m/z$ : 356.0932 (Calcd for  $\text{C}_{17}\text{H}_{19}\text{NO}_4\text{SNa}$   $[\text{M}+\text{Na}]^+$ : 356.0933).

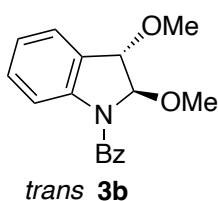

#### *trans*-2,3-dimethoxy-1-benzoylindoline (**3b**)

A solution of **2b** (166 mg, 0.5 mmol) in MeOH (20 mL) was stirred at 100 °C for 14 h. After addition of  $\text{H}_2\text{O}$ , the whole was extracted with AcOEt (3 x 25 mL), washed with brine (25 mL). The organic layer was dried over  $\text{MgSO}_4$  and concentrated *in vacuo*. The residue was purified by silica gel column chromatography (AcOEt/hexane = 1/5–1/2) to give **3b**.

45 mg, 31% yield. colorless solid; mp 243–250 °C; IR ( $\text{CHCl}_3$ ): 3014, 1655, 1101, 1086  $\text{cm}^{-1}$ ;  $^1\text{H}$  NMR (500 MHz,  $\text{CDCl}_3$ )  $\delta$ : 7.62 (d,  $J = 7.5$  Hz, 2H), 7.51–7.48 (m, 1H), 7.45 (d,  $J = 7.5$  Hz, 2H), 7.42 (d,  $J = 6.9$  Hz, 2H), 7.32 (br s, 1H), 7.12 (t,  $J = 7.5$  Hz, 1H), 5.25 (br s, 1H), 4.48 (s, 1H), 3.42 (s, 3H), 3.25 (br s, 3H);  $^{13}\text{C}$  NMR (125 MHz,  $\text{CDCl}_3$ )  $\delta$ : 170.1, 143.2, 136.1, 130.7, 130.3, 129.0, 128.5, 127.6, 126.6, 124.3, 94.9, 82.1, 56.2, 54.9; HRMS (ESI)  $m/z$ : 306.1103 (Calcd for  $\text{C}_{17}\text{H}_{17}\text{NO}_3\text{Na}$   $[\text{M}+\text{Na}]^+$ : 306.1106).

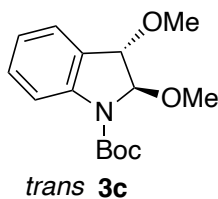

***trans*-2,3-dimethoxy-1-(*tert*-butoxycarbonyl)indoline (**3c**)**

To a solution of N-Boc indole **1c** (1.09 g, 5 mmol) in MeOH (50 mL) was added NBS (979 mg, 5.5 mmol). The mixture was stirred at room temperature for 5 min. After addition of H<sub>2</sub>O, the whole was extracted with AcOEt (3 x 100 mL), washed with brine (50 mL). The organic layer was dried over MgSO<sub>4</sub> and concentrated *in vacuo*. The resulting crude material was used without purification. A solution of the crude material in MeOH (40 mL) was stirred at 100 °C for 20 min. After addition of H<sub>2</sub>O, the whole was extracted with AcOEt (3 x 50 mL), washed with brine (30 mL). The organic layer was dried over MgSO<sub>4</sub> and concentrated *in vacuo*. The residue was purified by silica gel column chromatography (AcOEt/hexane = 1/20–1/5) to give **3c**.

146 mg, 11% yield. colorless oil; IR (CHCl<sub>3</sub>): 3019, 1705, 1223, 1207 cm<sup>-1</sup>; <sup>1</sup>H NMR (500 MHz, CDCl<sub>3</sub>) δ: 7.84 (br s, 1H), 7.36 (d, *J* = 7.5 Hz, 1H), 7.33 (t, *J* = 8.1 Hz, 1H), 7.03 (t, *J* = 6.9 Hz, 1H), 5.41 (s, 1H), 4.40 (s, 1H), 3.49 (s, 3H), 3.43 (s, 3H), 1.58 (s, 9H); <sup>13</sup>C NMR (125 MHz, CDCl<sub>3</sub>) δ: 152.4, 142.8, 130.4, 128.2, 126.4, 122.9, 116.4, 93.9, 83.2, 82.0, 56.2, 28.4; HRMS (ESI) *m/z*: 302.1369 (Calcd for C<sub>15</sub>H<sub>21</sub>NO<sub>4</sub>Na [M+Na]<sup>+</sup>: 302.1368).

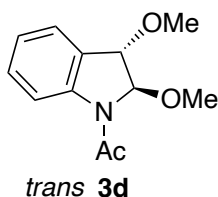

***trans*-2,3-dimethoxy-1-acetylindoline (**3d**)**

A solution of **2d** (328 mg, 1 mmol) in MeOH (30 mL) was stirred at 100 °C for 0.5 h. After addition of H<sub>2</sub>O, the whole was extracted with AcOEt (3 x 25 mL), washed with brine (25 mL). The organic layer was dried over MgSO<sub>4</sub> and concentrated *in vacuo*. The residue was purified by silica gel column chromatography (AcOEt/hexane = 1/5–1/2) to give **3d**.

81 mg, 29% yield. colorless solid; mp 190–196 °C; IR (CHCl<sub>3</sub>): 3019, 1670, 1223, 1207 cm<sup>-1</sup>; <sup>1</sup>H NMR (500 MHz, CDCl<sub>3</sub>) δ: 8.21 (d, *J* = 8.1 Hz, 1H), 7.38 (d, *J* = 7.5 Hz, 1H), 7.35 (ddd, *J* = 1.2, 7.5, 7.5 Hz, 1H), 7.09 (t, *J* = 7.5 Hz, 1H), 5.27 (s, 1H), 4.62 (s, 1H), 3.44 (s, 3H), 3.32 (s, 3H), 2.32 (s, 3H); <sup>13</sup>C NMR (125 MHz, CDCl<sub>3</sub>) δ: 169.9, 143.6, 130.7, 127.4, 126.1, 123.9, 117.2, 94.7, 81.9, 56.0, 53.0, 23.2; HRMS (ESI) *m/z*: 244.0950 (Calcd for C<sub>12</sub>H<sub>15</sub>NO<sub>3</sub>Na [M+Na]<sup>+</sup>: 244.0950).

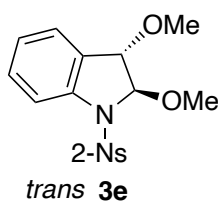

### ***trans*-2,3-dimethoxy-1-(2-nitrobenzenesulfonyl)indoline (3e)**

A solution of **2e** (146 mg, 0.4 mmol) in MeOH (20 mL) was stirred at 100 °C for 15 h. After addition of H<sub>2</sub>O, the whole was extracted with AcOEt (3 x 25 mL), washed with brine (25 mL). The organic layer was dried over MgSO<sub>4</sub> and concentrated *in vacuo*. The residue was purified by silica gel column chromatography (AcOEt/hexane = 1/5–1/3) to give **3b**.

17 mg, 13% yield. colorless solid; mp 278–281 °C; IR (CHCl<sub>3</sub>): 3019, 1223, 1207 cm<sup>-1</sup>; <sup>1</sup>H NMR (500 MHz, CDCl<sub>3</sub>) δ: 7.67 (d, *J* = 8.0 Hz, 1H), 7.61 (t, *J* = 8.0 Hz, 2H), 7.59 (d, *J* = 7.5 Hz, 1H), 7.54 (d, *J* = 8.0 Hz, 1H), 7.43 (t, *J* = 7.5 Hz, 1H), 7.39–7.36 (m, 2H), 7.17 (t, *J* = 7.5 Hz, 1H), 5.56 (s, 1H), 4.31 (s, 1H), 3.57 (s, 3H), 3.30 (s, 3H); <sup>13</sup>C NMR (125 MHz, CDCl<sub>3</sub>) δ: 148.7, 141.0, 134.0, 131.3, 130.9, 130.8, 130.7, 130.1, 127.1, 125.6, 123.9, 117.4, 95.9, 84.1, 57.0, 56.5; HRMS (ESI) *m/z*: 387.0626 (Calcd for C<sub>16</sub>H<sub>16</sub>N<sub>2</sub>O<sub>6</sub>Na [M+Na]<sup>+</sup>: 387.0627).

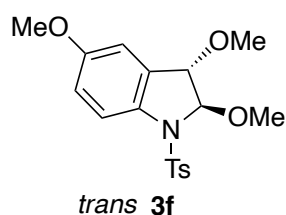

### ***trans*-2,3,5-trimethoxy-1-1-tosylindoline (3f)**

A solution of **2f** (412 mg, 1.0 mmol) in MeOH (20 mL) was stirred at 100 °C for 14 h. After addition of H<sub>2</sub>O, the whole was extracted with AcOEt (3 x 25 mL), washed with brine (25 mL). The organic layer was dried over MgSO<sub>4</sub> and concentrated *in vacuo*. The residue was purified by silica gel column chromatography (AcOEt/hexane = 1/5–1/3) to give **3f**.

265 mg, 72% yield. colorless solid; mp 240–242 °C; IR (CHCl<sub>3</sub>): 3019, 1223, 1207 cm<sup>-1</sup>; <sup>1</sup>H NMR (500 MHz, CDCl<sub>3</sub>) δ: 7.56 (d, *J* = 9.2 Hz, 1H), 7.52 (d, *J* = 8.6 Hz, 2H), 7.13 (d, *J* = 8.6 Hz, 2H), 6.88 (dd, *J* = 2.3, 8.6 Hz, 1H), 6.80 (d, *J* = 2.9 Hz, 1H), 5.25 (s, 1H), 4.16 (s, 1H), 3.75 (s, 3H), 3.59 (s, 3H), 3.13 (s, 3H), 2.32 (s, 3H); <sup>13</sup>C NMR (125 MHz, CDCl<sub>3</sub>) δ: 157.4, 143.9, 135.2, 135.0, 131.9, 129.3, 127.6, 118.9, 116.5, 111.8, 96.6, 84.3, 56.3, 56.0, 55.7, 21.6; HRMS (ESI) *m/z*: 386.1035 (Calcd for C<sub>18</sub>H<sub>21</sub>NO<sub>5</sub>Na [M+Na]<sup>+</sup>: 386.1038).

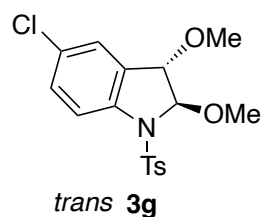

### ***trans*-5-chloro-2,3-dimethoxy-1-tosylindoline (3g)**

A solution of **2g** (208 mg, 0.5 mmol) in MeOH (20 mL) was stirred at 100 °C for 14 h. After addition of H<sub>2</sub>O, the whole was extracted with AcOEt (3 x 25 mL), washed with brine (25 mL). The organic layer was dried over MgSO<sub>4</sub> and concentrated *in vacuo*. The residue was purified by silica gel column chromatography (AcOEt/hexane = 1/5–1/2) to give **3g**.

27 mg, 15% yield. colorless solid; mp 260–264 °C; IR (CHCl<sub>3</sub>): 3019, 1223, 1207 cm<sup>-1</sup>; <sup>1</sup>H NMR (500 MHz,

CDCl<sub>3</sub>)  $\delta$ : 7.56 (d,  $J$  = 8.6 Hz, 2H), 7.55 (d,  $J$  = 9.2 Hz, 1H), 7.29 (dd,  $J$  = 2.3, 9.2 Hz, 2H), 7.24 (d,  $J$  = 2.3 Hz, 1H), 7.15 (d,  $J$  = 8.0 Hz, 2H), 5.30 (s, 1H), 4.20 (s, 1H), 3.58 (s, 3H), 3.16 (s, 3H), 2.33 (s, 3H); <sup>13</sup>C NMR (125 MHz, CDCl<sub>3</sub>)  $\delta$ : 144.3, 140.5, 134.9, 132.2, 130.6, 130.1, 129.4, 127.6, 127.0, 118.6, 96.6, 83.6, 56.4, 56.1, 21.6; HRMS (ESI)  $m/z$ : 390.0544, 392.0514 (Calcd for C<sub>17</sub>H<sub>18</sub>ClNO<sub>4</sub>SNa [M+Na]<sup>+</sup>: 390.0543, 392.0513).

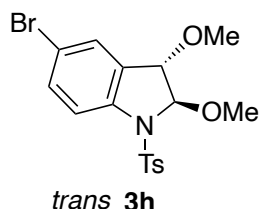

#### *trans*-5-bromo-2,3-dimethoxy-1-tosylindoline (**3h**)

A solution of **2h** (922 mg, 2 mmol) in MeOH (50 mL) was stirred at 100 °C for 16 h. After addition of H<sub>2</sub>O, the whole was extracted with AcOEt (3 x 25 mL), washed with brine (25 mL). The organic layer was dried over MgSO<sub>4</sub> and concentrated *in vacuo*. The residue was purified by silica gel column chromatography (AcOEt/hexane = 1/8–1/2) to give **3h** and a recovery of **2h** (533 mg, 58%).

95 mg, 12% yield (27%, brsm). colorless oil; IR (CHCl<sub>3</sub>): 3022, 1165, 1109 cm<sup>-1</sup>; <sup>1</sup>H NMR (500 MHz, CDCl<sub>3</sub>)  $\delta$ : 7.56 (d,  $J$  = 8.0 Hz, 2H), 7.49 (d,  $J$  = 8.6 Hz, 1H), 7.44 (dd,  $J$  = 2.3, 8.6 Hz, 2H), 7.39 (d,  $J$  = 1.7 Hz, 1H), 7.15 (d,  $J$  = 8.6 Hz, 2H), 5.29 (s, 1H), 4.20 (s, 1H), 3.58 (s, 3H), 3.17 (s, 3H), 2.33 (s, 3H); <sup>13</sup>C NMR (125 MHz, CDCl<sub>3</sub>)  $\delta$ : 144.4, 141.0, 134.9, 133.5, 132.6, 129.9, 129.5, 127.6, 119.0, 117.6, 96.6, 83.5, 56.4, 56.1, 21.7; HRMS (ESI)  $m/z$ : 434.0038, 436.0019 (Calcd for C<sub>17</sub>H<sub>18</sub>BrNO<sub>4</sub>SNa [M+Na]<sup>+</sup>: 434.0038, 436.0017).

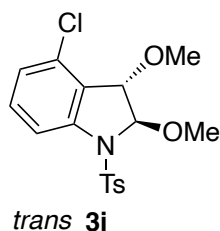

#### *trans*-4-chloro-2,3-dimethoxy-1-tosylindoline (**3i**)

A solution of **2i** (208 mg, 0.5 mmol) in MeOH (20 mL) was stirred at 100 °C for 15 h. After addition of H<sub>2</sub>O, the whole was extracted with AcOEt (3 x 25 mL), washed with brine (25 mL). The organic layer was dried over MgSO<sub>4</sub> and concentrated *in vacuo*. The residue was purified by silica gel column chromatography (AcOEt/hexane = 1/20–1/1) to give **3i** and a recovery of **2i** (107 mg, 51%).

60 mg, 32% yield (65%, brsm). colorless solid; mp >300 °C (decomp.); IR (CHCl<sub>3</sub>): 3019, 1223, 1207 cm<sup>-1</sup>; <sup>1</sup>H NMR (500 MHz, CDCl<sub>3</sub>)  $\delta$ : 7.60 (d,  $J$  = 8.6 Hz, 2H), 7.48 (d,  $J$  = 8.6 Hz, 1H), 7.24 (t,  $J$  = 8.6 Hz, 1H), 7.16 (d,  $J$  = 8.0 Hz, 2H), 7.03 (d,  $J$  = 8.0 Hz, 1H), 5.34 (s, 1H), 4.39 (s, 1H), 3.59 (s, 3H), 3.29 (s, 3H), 2.33 (s, 3H); <sup>13</sup>C NMR (125 MHz, CDCl<sub>3</sub>)  $\delta$ : 144.4, 143.1, 135.1, 132.8, 131.8, 129.5, 129.1, 127.6, 125.2, 115.4, 96.1, 82.9, 57.3, 56.1, 21.6; HRMS (ESI)  $m/z$ : 390.0540, 392.0512 (Calcd for C<sub>17</sub>H<sub>18</sub>ClNO<sub>4</sub>SNa [M+Na]<sup>+</sup>: 390.0543, 392.0513).

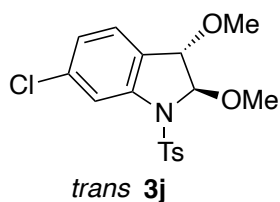

### **trans-6-chloro-2,3-dimethoxy-1-tosylindoline (3j)**

A solution of **2j** (417 mg, 1 mmol) in MeOH (30 mL) was stirred at 100 °C for 15 h. After addition of H<sub>2</sub>O, the whole was extracted with AcOEt (3 x 25 mL), washed with brine (25 mL). The organic layer was dried over MgSO<sub>4</sub> and concentrated *in vacuo*. The residue was purified by silica gel column chromatography (AcOEt/hexane = 1/5–1/3) to give **3j** and a recovery of **2i** (107 mg, 51%).

253mg, 69% yield. colorless solid; mp 293–296 °C; IR (CHCl<sub>3</sub>): 3018, 1223, 1207 cm<sup>-1</sup>; <sup>1</sup>H NMR (500 MHz, CDCl<sub>3</sub>) δ: 7.63 (d, *J* = 1.7 Hz, 1H), 7.60 (d, *J* = 8.0 Hz, 1H), 7.19 (d, *J* = 8.0 Hz, 1H), 7.17 (d, *J* = 8.6 Hz, 2H), 7.04 (dd, *J* = 2.3, 8.0 Hz, 1H), 5.32 (s, 1H), 4.21 (s, 1H), 3.57 (s, 3H), 3.16 (s, 3H), 2.34 (s, 3H); <sup>13</sup>C NMR (125 MHz, CDCl<sub>3</sub>) δ: 144.4, 143.1, 136.4, 135.0, 129.5, 128.9, 127.6, 124.9, 117.7, 96.8, 86.3, 56.2, 56.1, 21.7; HRMS (ESI) *m/z*: 390.0542, 392.0513 (Calcd for C<sub>17</sub>H<sub>18</sub>ClNO<sub>4</sub>SNa [M+Na]<sup>+</sup>: 390.0543, 392.0513).

### **General Procedure for the Indium-mediated S<sub>N</sub>Ar Reaction of 3 with 4a (Scheme 3)**

To a solution of **3** (0.5 mmol) and **4a** (98.4 mg, 0.75 mmol) in MeCN (10 mL) was added In(OTf)<sub>3</sub> (28.1 mg, 0.05 mmol). The mixture was stirred at 100 °C for 16 h. After reaction, the mixture was cooled to room temperature and then quenched by H<sub>2</sub>O (15 mL). The whole was extracted with AcOEt (3 x 25 mL), washed with brine (25 mL). The organic layer was dried over MgSO<sub>4</sub> and concentrated *in vacuo*. After filtration, and concentrated *in vacuo*. The residue was purified by silica gel column chromatography (AcOEt/hexane = 1/10–1/3, and/or CHCl<sub>3</sub>/hexane = 1/2–5/1) to give **6**.

The ratio of **5/6** was determined by <sup>1</sup>H-NMR analysis of the crude material.

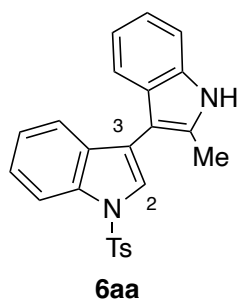

### **3-(2-Methylindol-3-yl)-1-tosylindole (6aa)**

187 mg, 93% yield. colorless solid; mp 79–81 °C; IR (CHCl<sub>3</sub>): 3468, 3019 cm<sup>-1</sup>; <sup>1</sup>H NMR (500 MHz, CDCl<sub>3</sub>) δ: 8.07 (d, *J* = 8.6 Hz, 1H), 8.06 (br s, 1H), 7.82 (d, *J* = 8.6 Hz, 2H), 7.57 (s, 1H), 7.44 (d, *J* = 8.0 Hz, 1H), 7.33–7.38 (m, *J* = 3H), 7.23 (d, *J* = 8.0 Hz, 2H), 7.21 (t, *J* = 7.5 Hz, 1H), 7.17 (ddd, *J* = 1.2, 6.7, 6.7 Hz, 1H), 7.06 (ddd, *J* = 1.2, 6.7, 6.7 Hz, 1H), 2.44 (s, 3H), 2.35 (s, 3H); <sup>13</sup>C NMR (125 MHz, CDCl<sub>3</sub>) δ: 144.9, 135.5, 135.4, 135.3, 132.9, 131.3, 130.0, 128.4, 127.0, 124.7, 124.0, 123.2, 121.7, 121.5, 119.9, 119.3, 117.2, 113.9, 110.5, 105.1, 21.7, 12.7; HRMS

(ESI)  $m/z$ : 423.1142 (Calcd for  $C_{24}H_{20}N_2O_2SNa$   $[M+Na]^+$ : 423.1143).

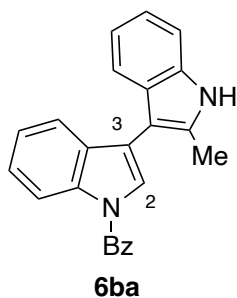

### 3-(2-Methylindol-3-yl)-1-benzoylindole (6ba)

166 mg, 95% yield. colorless solid; mp 245–248 °C; IR ( $CHCl_3$ ): 3468, 2976, 1680  $cm^{-1}$ ;  $^1H$  NMR (500 MHz,  $CDCl_3$ )  $\delta$ : 8.48 (d,  $J$  = 8.6 Hz, 1H), 8.06 (br s, 1H), 7.82–7.80 (m, 2H), 7.61–7.58 (m, 1H), 7.54–7.51 (m, 1H), 7.53 (d,  $J$  = 8.0 Hz, 2H), 7.46 (d,  $J$  = 8.0 Hz, 1H), 7.43 (ddd,  $J$  = 1.2, 8.0, 8.0 Hz, 1H), 7.34 (d,  $J$  = 8.6 Hz, 1H), 7.33 (s, 1H), 7.31 (ddd,  $J$  = 1.2, 7.5, 7.5 Hz, 1H), 7.17 (ddd,  $J$  = 1.2, 8.0, 8.0 Hz, 1H), 7.08 (t,  $J$  = 8.0 Hz, 1H), 2.45 (s, 3H);  $^{13}C$  NMR (125 MHz,  $CDCl_3$ )  $\delta$ : 168.7, 136.5, 135.5, 134.9, 132.9, 131.9, 131.3, 129.3, 128.7, 128.6, 125.4, 125.2, 123.9, 121.7, 121.0, 120.0, 119.3, 116.6, 116.5, 110.5, 105.3, 12.8; HRMS (ESI)  $m/z$ : 373.1317 (Calcd for  $C_{24}H_{18}N_2ONa$   $[M+Na]^+$ : 373.1317).

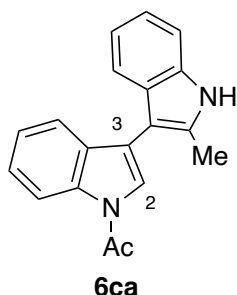

### 3-(2-Methylindol-3-yl)-1-acetylindole (6ca)

139 mg, 96% yield. colorless solid; mp 270–275 °C; IR ( $CHCl_3$ ): 3468, 3022, 1701  $cm^{-1}$ ;  $^1H$  NMR (500 MHz,  $CDCl_3$ )  $\delta$ : 8.52 (d,  $J$  = 6.3 Hz, 1H), 8.10 (br s, 1H), 7.48 (d,  $J$  = 8.0 Hz, 2H), 7.44 (s, 1H), 7.40 (t,  $J$  = 8.6 Hz, 1H), 7.37 (d,  $J$  = 8.6 Hz, 1H), 7.27 (t,  $J$  = 7.4 Hz, 1H), 7.18 (ddd,  $J$  = 1.2, 7.5, 7.5 Hz, 1H), 7.10 (t,  $J$  = 8.0 Hz, 1H), 7.30–7.25 (m, 2H), 7.21–7.19 (m, 3H), 2.69 (s, 3H), 2.48 (s, 3H);  $^{13}C$  NMR (125 MHz,  $CDCl_3$ )  $\delta$ : 168.6, 136.1, 135.5, 132.9, 131.0, 128.7, 125.4, 123.6, 123.2, 121.8, 121.0, 120.0, 119.3, 117.1, 116.8, 110.5, 105.3, 24.2, 12.8; HRMS (ESI)  $m/z$ : 311.1161 (Calcd for  $C_{19}H_{16}N_2ONa$   $[M+Na]^+$ : 311.1160).

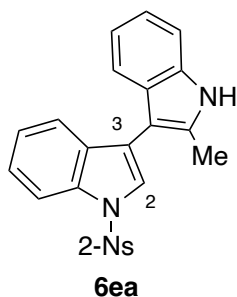

### 3-(2-Methylindol-3-yl)-1-(2-nitrobenzenesulfonyl)indole (6ea)

57 mg, 26% yield. yellow solid; mp >300 °C (decomp.); IR (CHCl<sub>3</sub>): 3447, 3019 cm<sup>-1</sup>; <sup>1</sup>H NMR (500 MHz, CDCl<sub>3</sub>) δ: 8.10 (br s, 1H), 7.98 (d, *J* = 7.5 Hz, 1H), 7.94 (d, *J* = 8.6 Hz, 1H), 7.74 (s, 1H), 7.72 (dd, *J* = 1.1, 5.2 Hz, 1H), 7.697.65 (m, 1H), 7.62 (s, 1H), 7.53 (d, *J* = 7.4 Hz, 1H), 7.47 (d, *J* = 8.5 Hz, 1H), 7.38–7.35 (m, 2H), 7.27 (t, *J* = 8.0 Hz, 1H), 7.18 (ddd, *J* = 1.1, 6.9, 6.9 Hz, 1H), 7.09 (ddd, *J* = 1.2, 6.9, 6.9 Hz, 1H), 2.51 (s, 3H); <sup>13</sup>C NMR (125 MHz, CDCl<sub>3</sub>) δ: 148.1, 135.5, 135.0, 134.9, 133.3, 132.4, 132.1, 131.3, 130.1, 128.5, 125.0, 124.7, 123.7, 122.0, 121.8, 120.0, 119.4, 117.0, 113.5, 110.5, 104.7, 12.7; HRMS (ESI) *m/z*: 454.0837 (Calcd for C<sub>23</sub>H<sub>17</sub>N<sub>3</sub>O<sub>4</sub>SNa [M+Na]<sup>+</sup>: 454.0838).

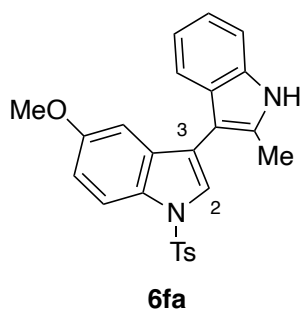

### 5-Methoxy-3-(2-methylindol-3-yl)-1-tosylindole (6fa)

186 mg, 86% yield. colorless solid; mp 234–237 °C; IR (CHCl<sub>3</sub>): 3468, 3019, 1173 cm<sup>-1</sup>; <sup>1</sup>H NMR (500 MHz, CDCl<sub>3</sub>) δ: 8.07 (br s, 1H), 7.96 (d, *J* = 9.2 Hz, 1H), 7.78 (d, *J* = 8.6 Hz, 2H), 7.51 (s, 1H), 7.36 (t, *J* = 8.1 Hz, 2H), 7.22 (d, *J* = 8.0 Hz, 2H), 7.17 (t, *J* = 8.0 Hz, 1H), 7.06 (t, *J* = 6.9 Hz, 1H), 6.96 (dd, *J* = 2.9, 9.2 Hz, 1H), 6.86 (d, *J* = 2.3 Hz, 1H), 3.70 (s, 3H), 2.44 (s, 3H), 2.35 (s, 3H); <sup>13</sup>C NMR (125 MHz, CDCl<sub>3</sub>) δ: 156.6, 145.0, 135.6, 135.2, 133.1, 132.5, 130.2, 130.0, 128.3, 126.9, 124.9, 121.7, 119.9, 119.3, 117.7, 114.9, 114.1, 110.7, 104.9, 103.8, 55.7, 21.7, 12.6; HRMS (ESI) *m/z*: 453.1249 (Calcd for C<sub>25</sub>H<sub>22</sub>N<sub>2</sub>O<sub>3</sub>SNa [M+Na]<sup>+</sup>: 453.1249).

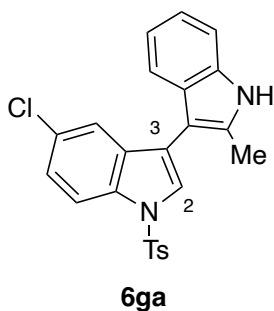

### 5-Chloro-3-(2-methylindol-3-yl)-1-tosylindole (6ga)



195 mg, 90% yield. colorless solid; mp 165–166 °C; IR (CHCl<sub>3</sub>): 3468, 3019 cm<sup>-1</sup>; <sup>1</sup>H NMR (500 MHz, CDCl<sub>3</sub>) δ: 8.09 (br s, 1H), 7.99 (d, *J* = 8.6 Hz, 1H), 7.89 (d, *J* = 8.6 Hz, 2H), 7.57 (s, 1H), 7.39 (d, *J* = 2.3 Hz, 1H), 7.35 (d, *J* = 8.0 Hz, 1H), 7.32 (d, *J* = 8.0 Hz, 1H), 7.30 (dd, *J* = 1.7, 8.6 Hz, 1H), 7.25 (d, *J* = 8.6 Hz, 2H), 7.18 (ddd, *J* = 1.2, 7.5, 7.5 Hz, 1H), 7.08 (ddd, *J* = 1.2, 8.0, 8.0 Hz, 1H), 2.42 (s, 3H), 2.36 (s, 3H); <sup>13</sup>C NMR (125 MHz, CDCl<sub>3</sub>) δ: 145.4, 135.5, 135.0, 133.8, 133.1, 132.7, 130.1, 129.3, 128.3, 126.9, 125.4, 125.1, 121.9, 121.1, 120.2, 119.0, 116.9, 115.0, 110.6, 104.3, 21.7, 12.6; HRMS (ESI) *m/z*: 457.0756, 459.0723 (Calcd for C<sub>24</sub>H<sub>19</sub>ClN<sub>2</sub>O<sub>2</sub>SNa [M+Na]<sup>+</sup>: 457.0754, 459.0724).

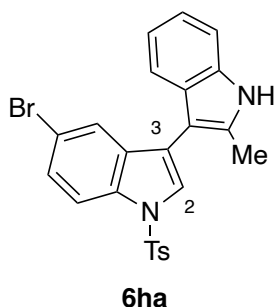

#### 5-Bromo-3-(2-methylindol-3-yl)-1-tosylindole (6ha)

203 mg, 85% yield. colorless solid; mp 239–243 °C; IR (CHCl<sub>3</sub>): 3468, 3017, 2976 cm<sup>-1</sup>; <sup>1</sup>H NMR (500 MHz, CDCl<sub>3</sub>) δ: 8.09 (br s, 1H), 7.94 (d, *J* = 8.6 Hz, 1H), 7.79 (d, *J* = 8.6 Hz, 2H), 7.55 (d, *J* = 2.9 Hz, 1H), 7.55 (s, 1H), 7.43 (d, *J* = 1.7, 8.6 Hz, 1H), 7.35 (d, *J* = 8.0 Hz, 1H), 7.32 (d, *J* = 6.7 Hz, 1H), 7.25 (d, *J* = 8.0 Hz, 2H), 7.18 (ddd, *J* = 1.2, 7.4, 7.4 Hz, 1H), 7.08 (ddd, *J* = 1.2, 7.4, 7.4 Hz, 1H), 2.42 (s, 3H), 2.37 (s, 3H); <sup>13</sup>C NMR (125 MHz, CDCl<sub>3</sub>) δ: 145.3, 135.5, 135.0, 134.1, 133.1, 130.1, 128.3, 127.7, 126.9, 125.2, 124.1, 121.9, 120.2, 119.0, 116.9, 116.8, 115.3, 110.6, 104.3, 21.7, 12.6; HRMS (ESI) *m/z*: 501.0251, 503.0233 (Calcd for C<sub>24</sub>H<sub>19</sub>BrN<sub>2</sub>O<sub>2</sub>SNa [M+Na]<sup>+</sup>: 501.0248, 503.0228).

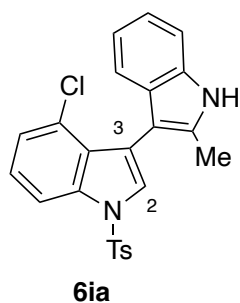

#### 4-Chloro-3-(2-methylindol-3-yl)-1-tosylindole (6ia)

126 mg, 58% yield. Colorless oil; IR (CHCl<sub>3</sub>): 3447, 3019 cm<sup>-1</sup>; <sup>1</sup>H NMR (500 MHz, CDCl<sub>3</sub>) δ: 8.01 (br s, 1H), 8.00 (d, *J* = 8.0 Hz, 1H), 7.81 (d, *J* = 8.6 Hz, 2H), 7.56 (s, 1H), 7.32 (d, *J* = 8.0 Hz, 1H), 7.28 (d, *J* = 8.0 Hz, 2H), 7.23 (d, *J* = 8.0 Hz, 1H), 7.17 (t, *J* = 8.1 Hz, 2H), 7.14 (t, *J* = 6.9 Hz, 1H), 7.04 (ddd, *J* = 1.2, 7.5, 7.5 Hz, 1H), 2.39 (s, 3H), 2.32 (s, 3H); <sup>13</sup>C NMR (125 MHz, CDCl<sub>3</sub>) δ: 145.4, 136.6, 135.1, 135.0, 134.1, 130.4, 130.1, 128.7, 127.4, 127.0, 126.9, 125.3, 124.8, 121.4, 119.8, 119.1, 116.0, 112.4, 110.2, 105.1, 21.7, 12.5; HRMS (ESI) *m/z*: 457.0751, 459.0723 (Calcd for C<sub>24</sub>H<sub>19</sub>ClN<sub>2</sub>O<sub>2</sub>SNa [M+Na]<sup>+</sup>: 457.0754, 459.0724).

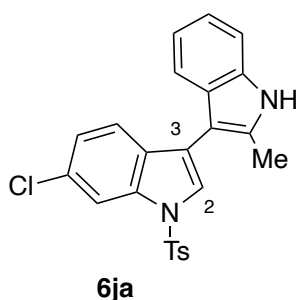

#### 6-Chloro-3-(2-methylindol-3-yl)-1-tosylindole (**6ja**)

131 mg, 60% yield. colorless oil; IR (CHCl<sub>3</sub>): 3447, 3019 cm<sup>-1</sup>; <sup>1</sup>H NMR (500 MHz, CDCl<sub>3</sub>) δ: 8.09 (br s, 2H), 7.82 (d, *J* = 8.6 Hz, 2H), 7.54 (s, 1H), 7.35 (d, *J* = 8.6 Hz, 2H), 7.32 (d, *J* = 8.0 Hz, 1H), 7.27 (d, *J* = 8.1 Hz, 2H), 7.19–7.15 (m, 2H), 7.06 (t, *J* = 8.0 Hz, 1H), 2.43 (s, 3H), 2.37 (s, 3H); <sup>13</sup>C NMR (125 MHz, CDCl<sub>3</sub>) δ: 145.3, 135.7, 135.4, 135.1, 133.0, 130.8, 130.1, 129.8, 128.2, 127.0, 124.4, 123.9, 122.3, 121.9, 120.1, 119.1, 117.1, 114.0, 110.6, 104.6, 21.7, 12.7; HRMS (ESI) *m/z*: 457.0755, 459.0721 (Calcd for C<sub>24</sub>H<sub>19</sub>ClN<sub>2</sub>O<sub>2</sub>SNa [M+Na]<sup>+</sup>: 457.0754, 459.0724).

#### General Procedure for the Indium-mediated S<sub>N</sub>Ar Reaction of **3a** with indoles **4** (Scheme 4)

To a solution of **3a** (166.7 mg, 0.5 mmol) and **4** (0.75 mmol) in MeCN (10 mL) was added In(OTf)<sub>3</sub> (28.1 mg, 0.05 mmol). The mixture was stirred at 100 °C for 16 h. After reaction, the mixture was cooled to room temperature and then quenched by H<sub>2</sub>O (15 mL). The whole was extracted with AcOEt (3 x 25 mL), washed with brine (25 mL). The organic layer was dried over MgSO<sub>4</sub> and concentrated *in vacuo*. After filtration, and concentrated *in vacuo*. The residue was purified by silica gel column chromatography (AcOEt/hexane = 1/10–1/3, and/or CHCl<sub>3</sub>/hexane = 1/2–5/1) to give **6**.

The ratio of **5**/**6** was determined by <sup>1</sup>H-NMR analysis of the crude material.

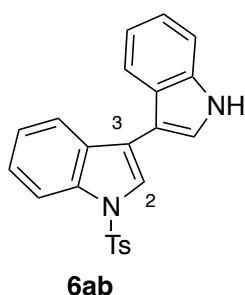

#### 3-(Indol-3-yl)-1-tosylindole (**6ab**)

173 mg, 90% yield. colorless solid; mp 270–271 °C; IR (CHCl<sub>3</sub>): 3476, 3019 cm<sup>-1</sup>; <sup>1</sup>H NMR (500 MHz, CDCl<sub>3</sub>) δ: 8.31 (br s, 1H), 8.08 (d, *J* = 8.6 Hz, 1H), 7.82 (d, *J* = 9.2 Hz, 2H), 7.81 (s, 1H), 7.78 (d, *J* = 8.0 Hz, 1H), 7.72 (d, *J* = 8.0 Hz, 1H), 7.49 (d, *J* = 2.3 Hz, 1H), 7.46 (d, *J* = 8.0 Hz, 1H), 7.37 (t, *J* = 7.5 Hz, 1H), 7.30–7.25 (m, 2H), 7.21–7.19 (m, 3H), 2.33 (s, 3H); <sup>13</sup>C NMR (125 MHz, CDCl<sub>3</sub>) δ: 144.9, 136.4, 135.5, 135.4, 130.5, 130.0, 127.0, 126.4, 124.9, 123.4, 122.9, 122.5, 120.9, 120.5, 120.1, 117.4, 114.0, 111.5, 108.9, 21.6; HRMS (ESI) *m/z*: 409.0986 (Calcd for C<sub>23</sub>H<sub>18</sub>N<sub>2</sub>O<sub>2</sub>SNa [M+Na]<sup>+</sup>: 409.0987).

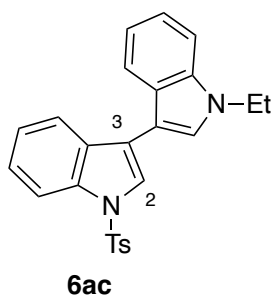

### 3-(1-Ethylindol-3-yl)-1-tosylindole (6ac)

58 mg, 28% yield. colorless solid; mp 82–83 °C; IR (CHCl<sub>3</sub>): 3482, 3018 cm<sup>-1</sup>; <sup>1</sup>H NMR (500 MHz, CDCl<sub>3</sub>) δ: 8.10 (d, *J* = 8.0 Hz, 1H), 7.82 (d, *J* = 8.6 Hz, 2H), 7.81 (s, 1H), 7.75 (d, *J* = 7.5 Hz, 1H), 7.43 (d, *J* = 6.9 Hz, 1H), 7.42 (s, 1H), 7.38 (t, *J* = 8.6 Hz, 1H), 7.31 (t, *J* = 6.9 Hz, 1H), 7.29 (t, *J* = 7.4 Hz, 1H), 7.21 (t, *J* = 6.9 Hz, 1H), 7.20 (d, *J* = 8.1 Hz, 2H), 4.25 (q, *J* = 7.5 Hz, 2H), 2.32 (s, 3H), 1.53 (t, *J* = 7.5 Hz, 3H); <sup>13</sup>C NMR (125 MHz, CDCl<sub>3</sub>) δ: 1444.9, 136.3, 135.6, 135.4, 130.5, 129.9, 126.9, 125.5, 124.9, 123.4, 122.3, 122.2, 121.0, 120.3, 120.0, 117.7, 114.0, 109.8, 41.2, 21.7, 15.6; HRMS (ESI) *m/z*: 437.1300 (Calcd for C<sub>25</sub>H<sub>22</sub>N<sub>2</sub>O<sub>2</sub>SNa [M+Na]<sup>+</sup>: 437.1300).

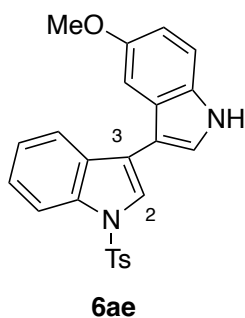

### 3-(5-Methoxyindol-3-yl)-1-tosylindole (6ae)

184 mg, 88% yield. colorless solid; mp 209–210 °C; IR (CHCl<sub>3</sub>): 3476, 3013, 2976, 1173 cm<sup>-1</sup>; <sup>1</sup>H NMR (500 MHz, CDCl<sub>3</sub>) δ: 8.25 (br s, 1H), 8.10 (d, *J* = 8.1 Hz, 1H), 7.82 (d, *J* = 8.0 Hz, 2H), 7.78 (s, 1H), 7.70 (d, *J* = 7.5 Hz, 1H), 7.40 (d, *J* = 2.3 Hz, 1H), 7.38 (t, *J* = 7.5 Hz, 1H), 7.32 (d, *J* = 9.2 Hz, 1H), 7.27 (t, *J* = 7.5 Hz, 1H), 7.20 (s, 1H), 7.19 (d, *J* = 8.6 Hz, 2H), 6.94 (dd, *J* = 1.8, 8.6 Hz, 1H), 3.85 (s, 3H), 2.31 (s, 3H); <sup>13</sup>C NMR (125 MHz, CDCl<sub>3</sub>) δ: 154.8, 145.0, 135.5, 135.3, 131.5, 130.6, 130.0, 126.9, 126.8, 125.0, 123.5, 122.3, 121.0, 117.6, 114.0, 113.0, 112.3, 108.5, 101.9, 56.1, 21.6; HRMS (ESI) *m/z*: 439.1092 (Calcd for C<sub>24</sub>H<sub>20</sub>N<sub>2</sub>O<sub>3</sub>SNa [M+Na]<sup>+</sup>: 439.1092).

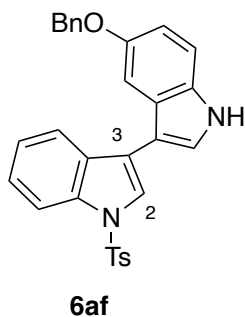

### 3-(5-Benzoyloxyindol-3-yl)-1-tosylindole (6af)

208 mg, 84% yield. colorless solid; mp 179–181 °C; IR (CHCl<sub>3</sub>): 3480, 3019, 1074 cm<sup>-1</sup>; <sup>1</sup>H NMR (500 MHz, CDCl<sub>3</sub>) δ: 8.20 (br s, 1H), 7.81 (d, *J* = 8.0 Hz, 2H), 7.73 (s, 1H), 7.67 (d, *J* = 8.1 Hz, 1H), 7.48 (d, *J* = 7.5 Hz, 2H), 7.43–7.38 (m, 3H), 7.36–7.31 (m, 3H), 7.27–7.24 (m, 3H), 7.20 (d, *J* = 8.0 Hz, 2H), 7.01 (dd, *J* = 1.7, 8.6 Hz, 1H), 5.10 (s, 2H), 2.32 (s, 3H); <sup>13</sup>C NMR (125 MHz, CDCl<sub>3</sub>) δ: 153.9, 144.9, 137.6, 135.5, 135.4, 131.7, 130.5, 130.0, 128.7, 127.9, 127.7, 127.0, 126.8, 124.9, 123.4, 123.3, 122.3, 120.9, 117.5, 114.0, 113.8, 112.2, 108.7, 103.6, 71.1, 21.6; HRMS (ESI) *m/z*: 515.1405 (Calcd for C<sub>30</sub>H<sub>24</sub>N<sub>2</sub>O<sub>3</sub>SNa [M+Na]<sup>+</sup>: 515.1405).

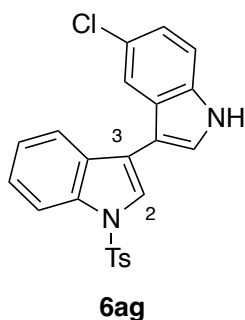

### 3-(5-Chloroindol-3-yl)-1-tosylindole (6ag)

137mg, 65% yield. colorless solid; mp 180–183 °C; IR (CHCl<sub>3</sub>): 3474, 3017, 2976 cm<sup>-1</sup>; <sup>1</sup>H NMR (500 MHz, CDCl<sub>3</sub>) δ: 8.36 (br s, 1H), 8.08 (d, *J* = 8.6 Hz, 1H), 7.82 (d, *J* = 8.6 Hz, 2H), 7.75 (s, 1H), 7.67 (d, *J* = 1.7 Hz, 1H), 7.65 (d, *J* = 8.0 Hz, 1H), 7.47 (d, *J* = 2.3 Hz, 1H), 7.39–7.35 (m, 2H), 7.29–7.21 (m, 4H), 2.34 (s, 3H); <sup>13</sup>C NMR (125 MHz, CDCl<sub>3</sub>) δ: 145.1, 135.5, 135.3, 134.7, 130.3, 130.0, 127.6, 127.0, 126.3, 125.1, 123.9, 123.5, 123.2, 122.7, 120.7, 119.5, 116.7, 114.0, 112.5, 108.7, 21.7; HRMS (ESI) *m/z*: 443.0596, 445.0567 (Calcd for C<sub>23</sub>H<sub>17</sub>ClN<sub>2</sub>O<sub>2</sub>SNa [M+Na]<sup>+</sup>: 443.0597, 445.0568).

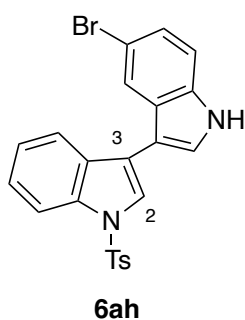

### 3-(5-Bromoindol-3-yl)-1-tosylindole (6ah)

125 mg, 54% yield. colorless solid; mp 98–99 °C; IR (CHCl<sub>3</sub>): 3472, 3019 cm<sup>-1</sup>; <sup>1</sup>H NMR (500 MHz, CDCl<sub>3</sub>) δ: 8.37 (br s, 1H), 8.09 (d, *J* = 8.0 Hz, 1H), 7.83 (s, 1H), 7.82 (d, *J* = 5.8 Hz, 2H), 7.74 (s, 1H), 7.64 (d, *J* = 8.1 Hz, 1H), 7.44 (s, 1H), 7.39–7.26 (m, 4H), 7.22 (d, *J* = 8.0 Hz, 2H), 2.33 (s, 3H); <sup>13</sup>C NMR (125 MHz, CDCl<sub>3</sub>) δ: 145.1, 135.5, 135.3, 135.0, 130.3, 130.0, 128.2, 126.9, 125.8, 125.1, 123.8, 123.6, 122.7, 122.5, 120.7, 116.7, 114.0, 113.8, 113.0, 108.6, 21.7; HRMS (ESI) *m/z*: 487.0091, 489.0070 (Calcd for C<sub>23</sub>H<sub>17</sub>BrN<sub>2</sub>O<sub>2</sub>SNa [M+Na]<sup>+</sup>: 487.0092, 489.0071).

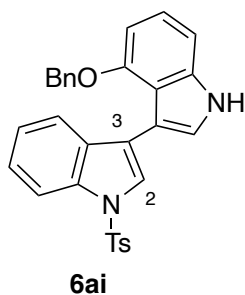

### 3-(4-Benzyloxyindol-3-yl)-1-tosylindole (6ai)

185 mg, 75% yield. colorless solid; mp 160–165 °C; IR (CHCl<sub>3</sub>): 3476, 3011, 2959, 1174, 1126 cm<sup>-1</sup>; <sup>1</sup>H NMR (500 MHz, CDCl<sub>3</sub>) δ: 8.29 (br s, 1H), 7.99 (d, *J* = 8.6 Hz, 1H), 7.74 (s, 1H), 7.71 (d, *J* = 8.6 Hz, 2H), 7.57 (d, *J* = 8.1 Hz, 1H), 7.27–7.23 (m, 2H), 7.16–7.10 (m, 2H), 7.08–7.05 (m, 4H), 7.01 (t, *J* = 7.5 Hz, 2H), 6.82 (d, *J* = 7.5 Hz, 2H), 6.60 (d, *J* = 8.0 Hz, 1H), 5.00 (s, 2H), 2.24 (s, 3H); <sup>13</sup>C NMR (125 MHz, CDCl<sub>3</sub>) δ: 153.5, 144.6, 138.3, 137.0, 135.6, 135.1, 132.1, 129.8, 128.2, 127.2, 126.8, 126.4, 124.4, 123.5, 123.2, 122.7, 121.6, 118.2, 117.2, 113.5, 107.9, 105.1, 102.3, 70.0, 21.6; HRMS (ESI) *m/z*: 515.1406 (Calcd for C<sub>30</sub>H<sub>24</sub>N<sub>2</sub>O<sub>3</sub>SNa [M+Na]<sup>+</sup>: 515.1405).

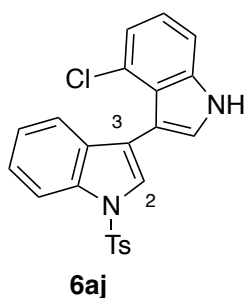

### 3-(4-Chloroindol-3-yl)-1-tosylindole (6aj)

133 mg, 63% yield. colorless solid; mp 110–112 °C; IR (CHCl<sub>3</sub>): 3472, 3019 cm<sup>-1</sup>; <sup>1</sup>H NMR (500 MHz, CDCl<sub>3</sub>) δ: 8.52 (br s, 1H), 8.06 (d, *J* = 8.6 Hz, 1H), 7.79 (d, *J* = 8.6 Hz, 2H), 7.64 (s, 1H), 7.42 (d, *J* = 8.0 Hz, 1H), 7.33 (t, *J* = 8.6 Hz, 2H), 7.25–7.19 (m, 4H), 7.13 (t, *J* = 8.0 Hz, 1H), 7.08 (d, *J* = 7.5 Hz, 1H), 2.32 (s, 3H); <sup>13</sup>C NMR (125 MHz, CDCl<sub>3</sub>) δ: 145.0, 137.6, 135.5, 134.9, 132.9, 129.9, 126.9, 126.5, 125.7, 125.5, 124.7, 124.3, 123.4, 123.1, 121.4, 121.2, 117.3, 113.7, 110.4, 107.5, 21.7; HRMS (ESI) *m/z*: 443.0595, 445.0566 (Calcd for C<sub>23</sub>H<sub>17</sub>ClN<sub>2</sub>O<sub>2</sub>SNa [M+Na]<sup>+</sup>: 443.0597, 445.0568).

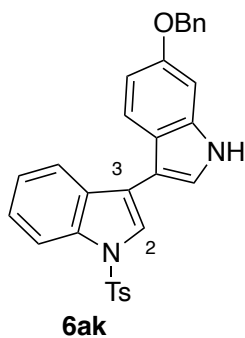

### 3-(6-Benzyloxyindol-3-yl)-1-tosylindole (6ak)

201 mg, 82% yield. colorless solid; mp 179–180 °C; IR (CHCl<sub>3</sub>): 3447, 3019, 1175 cm<sup>-1</sup>; <sup>1</sup>H NMR (500 MHz, CDCl<sub>3</sub>) δ: 8.14 (br s, 1H), 8.08 (d, *J* = 8.6 Hz, 1H), 7.80 (d, *J* = 8.1 Hz, 2H), 7.79 (s, 1H), 7.70 (d, *J* = 7.5 Hz, 1H), 7.47 (d, *J* = 7.5 Hz, 2H), 7.41–7.31 (m, 5H), 7.26 (t, *J* = 7.5 Hz, 1H), 7.19 (d, *J* = 8.0 Hz, 2H), 6.97–6.96 (m, 2H), 5.12 (s, 2H), 2.31 (s, 3H); <sup>13</sup>C NMR (125 MHz, CDCl<sub>3</sub>) δ: 156.1, 144.9, 137.4, 137.1, 135.5, 135.3, 130.4, 130.0, 128.7, 128.0, 127.6, 126.9, 124.9, 123.4, 122.3, 121.5, 120.9, 120.7, 117.5, 114.0, 111.2, 108.8, 96.3, 70.7, 21.6; HRMS (ESI) *m/z*: 515.1404 (Calcd for C<sub>30</sub>H<sub>24</sub>N<sub>2</sub>O<sub>3</sub>SNa [M+Na]<sup>+</sup>: 515.1405).

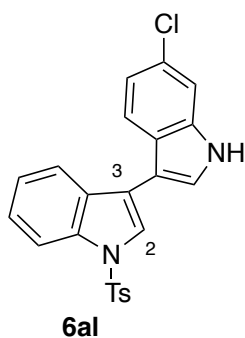

### 3-(6-Chloroindol-3-yl)-1-tosylindole (6al)

120 mg, 57% yield. colorless solid; mp 176–180 °C; IR (CHCl<sub>3</sub>): 3472, 3019 cm<sup>-1</sup>; <sup>1</sup>H NMR (500 MHz, CDCl<sub>3</sub>) δ: 8.29 (br s, 1H), 8.07 (d, *J* = 8.0 Hz, 1H), 7.82 (d, *J* = 8.6 Hz, 2H), 7.77 (s, 1H), 7.66 (t, *J* = 8.1 Hz, 2H), 7.45 (d, *J* = 2.9 Hz, 1H), 7.44 (d, *J* = 1.8 Hz, 1H), 7.37 (ddd, *J* = 1.2, 8.2, 8.2 Hz, 1H), 7.22 (d, *J* = 8.6 Hz, 2H), 7.16 (dd, *J* = 1.7, 8.6 Hz, 1H), 2.33 (s, 3H); <sup>13</sup>C NMR (125 MHz, CDCl<sub>3</sub>) δ: 145.1, 136.7, 135.4, 135.3, 130.3, 130.0, 128.7, 126.9, 125.1, 125.0, 123.5, 123.2, 122.6, 121.2, 120.9, 120.8, 116.9, 114.0, 111.5, 109.0, 21.7; HRMS (ESI) *m/z*: 443.0596, 445.0569 (Calcd for C<sub>23</sub>H<sub>17</sub>ClN<sub>2</sub>O<sub>2</sub>SNa [M+Na]<sup>+</sup>: 443.0597, 445.0568).

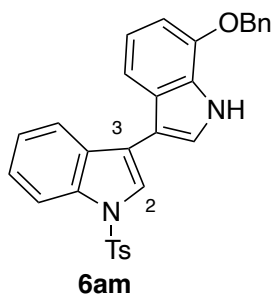

### 3-(7-Benzyloxyindol-3-yl)-1-tosylindole (6am)

215 mg, 87% yield. colorless solid; mp 150–154 °C; IR (CHCl<sub>3</sub>): 3474, 3017, 2976, 1174 cm<sup>-1</sup>; <sup>1</sup>H NMR (500 MHz, CDCl<sub>3</sub>) δ: 8.56 (br s, 1H), 8.08 (d, *J* = 8.6 Hz, 1H), 7.81 (d, *J* = 8.6 Hz, 2H), 7.80 (s, 1H), 7.72 (d, *J* = 8.0 Hz, 1H), 7.50 (d, *J* = 6.9 Hz, 2H), 7.45–7.34 (m, 6H), 7.26 (t, *J* = 8.0 Hz, 1H), 7.21 (d, *J* = 8.0 Hz, 2H), 7.11 (t, *J* = 8.0 Hz, 1H), 6.80 (d, *J* = 8.1 Hz, 1H), 5.25 (s, 2H), 2.32 (s, 3H); <sup>13</sup>C NMR (125 MHz, CDCl<sub>3</sub>) δ: 145.6, 144.9, 137.0, 135.5, 135.4, 130.5, 130.0, 128.8, 128.3, 128.0, 127.8, 127.2, 126.9, 124.9, 123.4, 122.5, 122.1, 120.9, 120.8, 117.6, 114.0, 113.0, 109.3, 103.9, 70.5, 21.6; HRMS (ESI) *m/z*: 515.1404 (Calcd for C<sub>30</sub>H<sub>24</sub>N<sub>2</sub>O<sub>3</sub>SNa [M+Na]<sup>+</sup>: 515.1405).

### Gram-scale synthesis of 6am

To a solution of **3a** (1.67 g, 5 mmol) and **4** (1.68 g, 7.5 mmol) in MeCN (80 mL) was added In(OTf)<sub>3</sub> (281 mg, 0.5 mmol). The mixture was stirred at 100 °C for 16 h. After reaction, the mixture was cooled to room temperature and then quenched by H<sub>2</sub>O (50 mL). The whole was extracted with AcOEt (3 x 80 mL), washed with brine (50 mL). The organic layer was dried over MgSO<sub>4</sub> and concentrated *in vacuo*. After filtration, and concentrated *in vacuo*. The residue was purified by silica gel column chromatography (AcOEt/hexane = 1/10–1/3, and/or CHCl<sub>3</sub>/hexane = 1/2–5/1) to give **6am** (2.054 g, 4.17 mmol, 83%).

### Amination of 3a (Scheme 6)

To a solution of **3a** (333.4 mg, 1 mmol) and methyl anthranilate (202.7 mg, 1.5 mmol) in MeCN (20 mL) was added In(OTf)<sub>3</sub> (56.2 mg, 0.1 mmol). The mixture was stirred at 100 °C for 16 h. After reaction, the mixture was cooled to room temperature and then quenched by H<sub>2</sub>O (30 mL). The whole was extracted with AcOEt (3 x 50 mL), washed with brine (50 mL). The organic layer was dried over MgSO<sub>4</sub> and concentrated *in vacuo*. After filtration, and concentrated *in vacuo*. The residue was purified by silica gel column chromatography (AcOEt/hexane = 1/5–1/3, and CHCl<sub>3</sub>/hexane = 1/1) to give **7**.

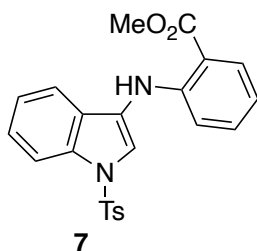

### Methyl 2-((1-tosylindol-3-yl)amino)benzoate (**7**)

342 mg, 81% yield. colorless solid; mp 268–269 °C; IR (CHCl<sub>3</sub>): 3482, 3019, 1684 cm<sup>-1</sup>; <sup>1</sup>H NMR (500 MHz, CDCl<sub>3</sub>) δ: 9.67 (br s, 1H), 8.05 (d, *J* = 8.6 Hz, 1H), 8.00 (dd, *J* = 1.2, 8.1 Hz, 1H), 7.75 (d, *J* = 8.6 Hz, 2H), 7.51 (s, 1H), 7.47 (d, *J* = 8.0 Hz, 1H), 7.38 (ddd, *J* = 1.2, 8.0, 8.0 Hz, 1H), 7.36 (ddd, *J* = 1.2, 8.0, 8.0 Hz, 1H), 7.24 (t, *J* = 7.5 Hz, 1H), 7.20 (d, *J* = 8.6 Hz, 2H), 7.03 (d, *J* = 8.6 Hz, 1H), 6.77 (t, *J* = 7.5 Hz, 1H), 3.92 (s, 3H), 2.33 (s, 3H); <sup>13</sup>C NMR (125 MHz, CDCl<sub>3</sub>) δ: 169.2, 147.9, 144.9, 134.9, 134.7, 134.4, 131.7, 129.9, 127.5, 126.9, 125.6, 124.4, 123.4, 118.9, 117.4, 115.0, 114.4, 114.3, 111.8, 52.0, 21.7; HRMS (ESI) *m/z*: 443.1046 (Calcd for C<sub>23</sub>H<sub>20</sub>N<sub>2</sub>O<sub>4</sub>Na [M+Na]<sup>+</sup>: 443.1042).

### Amination/cyclization of 3a and 2-aminoacetophenone (Scheme 6)

To a solution of **3a** (333.4 mg, 1 mmol) and 2-aminoacetophenone (202.7 mg, 1.5 mmol) in MeCN (20 mL) was added In(OTf)<sub>3</sub> (56.2 mg, 0.1 mmol). The mixture was stirred at 100 °C for 16 h. After reaction, the mixture was cooled to room temperature and then quenched by H<sub>2</sub>O (30 mL). The whole was extracted with AcOEt (3 x 50 mL), washed with brine (50 mL). The organic layer was dried over MgSO<sub>4</sub> and concentrated *in vacuo*. After filtration, and concentrated *in vacuo*. The residue was purified by silica gel column chromatography (AcOEt/hexane = 1/5–1/3, and CHCl<sub>3</sub>/hexane = 1/1) to give **8**.

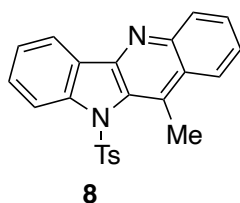

### 11-Methyl-10-tosyl-10H-indolo[3,2-*b*]quinoline (**8**)

235 mg, 61% yield. Pale yellow solid; mp >300 °C; IR (CHCl<sub>3</sub>): 3019 cm<sup>-1</sup>; <sup>1</sup>H NMR (500 MHz, CDCl<sub>3</sub>) δ: 8.22 (d, *J* = 8.6 Hz, 2H), 8.14 (d, *J* = 8.6 Hz, 1H), 8.03 (d, *J* = 7.5 Hz, 1H), 7.75 (ddd, *J* = 1.8, 7.5, 7.5 Hz, 1H), 7.64 (ddd, *J* = 1.2, 7.4, 7.4 Hz, 1H), 7.56 (ddd, *J* = 1.2, 8.0, 8.0 Hz, 1H), 7.39 (t, *J* = 7.4 Hz, 1H), 6.91 (d, *J* = 7.6 Hz, 2H), 6.76 (d, *J* = 8.6 Hz, 2H), 3.18 (s, 3H), 2.13 (s, 3H); <sup>13</sup>C NMR (125 MHz, CDCl<sub>3</sub>) δ: 151.1, 146.8, 144.8, 144.7, 136.3, 132.9, 131.4, 130.4, 129.5, 129.4, 129.3, 129.1, 129.0, 127.9, 127.2, 126.5, 126.3, 124.9, 121.7, 120.1, 21.5, 17.7; HRMS (ESI) *m/z*: 409.0986 (Calcd for C<sub>23</sub>H<sub>18</sub>N<sub>2</sub>O<sub>2</sub>SNa [M+Na]<sup>+</sup>: 409.0987).

### Methoxy-alkoxy exchange reaction of **3a** with 2-propanol (Scheme 6)

To a solution of **3a** (333.4 mg, 1 mmol) and 2-propanol (0.77 mL, 10 mmol) in MeCN (20 mL) was added In(OTf)<sub>3</sub> (56.2 mg, 0.1 mmol). The mixture was stirred at 100 °C for 16 h. After reaction, the mixture was cooled to room temperature and then quenched by H<sub>2</sub>O (30 mL). The whole was extracted with AcOEt (3 x 50 mL), washed with brine (50 mL). The organic layer was dried over MgSO<sub>4</sub> and concentrated *in vacuo*. After filtration, and concentrated *in vacuo*. The residue was purified by silica gel column chromatography (AcOEt/hexane = 1/10–1/5) to give **9**.

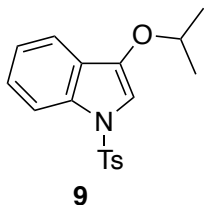

### 3-Isopropoxy-1-tosylindole (**9**)

152 mg, 46% yield. colorless solid; mp 98–100 °C; R (CHCl<sub>3</sub>): 3019, 2978, 1168, 1092 cm<sup>-1</sup>; <sup>1</sup>H NMR (500 MHz, CDCl<sub>3</sub>) δ: 7.98 (d, *J* = 8.6 Hz, 1H), 7.67 (d, *J* = 8.6 Hz, 2H), 7.49 (d, *J* = 8.1 Hz, 1H), 7.31 (ddd, *J* = 1.2, 8.0, 8.0 Hz, 1H), 7.19 (t, *J* = 7.5 Hz, 1H), 7.15 (d, *J* = 8.0 Hz, 2H), 6.87 (s, 1H), 4.39–4.34 (m, 1H), 2.31 (s, 3H), 1.38 (s, 3H), 1.37 (s, 3H); <sup>13</sup>C NMR (125 MHz, CDCl<sub>3</sub>) δ: 144.6, 144.2, 134.8, 134.2, 129.7, 126.8, 125.8, 125.7, 123.2, 118.8, 114.3, 105.4, 73.4, 21.8, 21.6; HRMS (ESI) *m/z*: 352.0982 (Calcd for C<sub>18</sub>H<sub>19</sub>NO<sub>3</sub>SNa [M+Na]<sup>+</sup>: 352.0983).

### C2 Alkylation of **3a** in acetone (Scheme 6)

To a solution of **3a** (333.4 mg, 1 mmol) in acetone (10 mL) was added In(OTf)<sub>3</sub> (56.2 mg, 0.1 mmol). The mixture was stirred at 100 °C (oil-bath temperature) for 16 h. After reaction, the mixture was cooled to room temperature and then quenched by H<sub>2</sub>O (30 mL). The whole was extracted with AcOEt (3 x 50 mL), washed with brine (50 mL). The organic layer was dried over MgSO<sub>4</sub> and concentrated *in vacuo*. After filtration, and concentrated *in vacuo*. The residue was purified by silica gel column chromatography (AcOEt/hexane = 1/10–1/5) to give **10**.



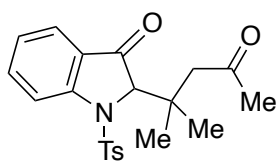

**10**

**2-(2-Methyl-4-oxopentan-2-yl)-1-tosylindolin-3-one (10)**

167 mg, 43% yield. colorless solid; mp 249–251 °C; IR (CHCl<sub>3</sub>): 3019, 1717 cm<sup>-1</sup>; <sup>1</sup>H NMR (500 MHz, CDCl<sub>3</sub>) δ: 8.02(d, *J* = 8.0 Hz, 1H), 7.66 (t, *J* = 6.9 Hz, 1H), 7.45 (d, *J* = 8.0 Hz, 1H), 7.29 (d, *J* = 8.1 Hz, 2H), 7.23 (t, *J* = 7.5 Hz, 1H), 7.08 (d, *J* = 8.0 Hz, 2H), 4.64 (s, 1H), 2.92 (d, *J* = 18.9 Hz, 1H), 2.58 (d, *J* = 18.9 Hz, 1H), 2.29 (s, 3H), 2.19 (s, 3H), 1.01 (s, 3H), 0.98 (s, 3H); <sup>13</sup>C NMR (125 MHz, CDCl<sub>3</sub>) δ: 207.7, 200.1, 154.5, 144.9, 136.5, 132.1, 129.8, 128.7, 127.8, 126.1, 123.5, 120.6, 71.2, 51.6, 38.1, 31.3, 25.4, 23.0, 21.6; HRMS (ESI) *m/z*: 408.1243 (Calcd for C<sub>21</sub>H<sub>23</sub>NO<sub>4</sub>SNa [M+Na]<sup>+</sup>: 408.1246).

### Control Experiment (Scheme 7)

To a solution of **3a** (333.4 mg, 1 mmol) in MeCN (10 mL) was added In(OTf)<sub>3</sub> (562 mg, 1 mmol). The mixture was stirred at 100 °C for 1 h. After reaction, the mixture was cooled to room temperature and then quenched by H<sub>2</sub>O (15 mL). The whole was extracted with AcOEt (3 x 25 mL), washed with brine (25 mL). The organic layer was dried over MgSO<sub>4</sub> and concentrated *in vacuo*. After filtration, and concentrated *in vacuo*. The residue was purified by silica gel column chromatography (AcOEt/hexane = 1/10–1/5) to give **11** and **12**.

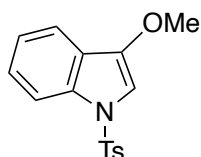

**11**

### 3-Methoxy-1-tosylindole (**11**)

216 mg, 72% yield. colorless solid; mp 148-150 °C; IR (CHCl<sub>3</sub>): 3019, 1172 cm<sup>-1</sup>; <sup>1</sup>H NMR (500 MHz, CDCl<sub>3</sub>) δ: 7.99 (d, *J* = 8.6 Hz, 1H), 7.69 (d, *J* = 8.6 Hz, 2H), 7.49 (d, *J* = 7.5 Hz, 1H), 7.33 (ddd, *J* = 1.2, 8.0, 8.0 Hz, 1H), 7.21 (t, *J* = 8.1 Hz, 1H), 7.16 (d, *J* = 8.6 Hz, 2H), 6.90 (s, 1H), 3.87 (s, 3H), 2.31 (s, 3H); <sup>13</sup>C NMR (125 MHz, CDCl<sub>3</sub>) δ: 146.8, 144.7, 134.8, 134.3, 129.7, 126.8, 125.8, 124.7, 123.3, 118.6, 114.3, 104.0, 57.9, 21.6; HRMS (ESI) *m/z*: 324.0668 (Calcd for C<sub>16</sub>H<sub>15</sub>NO<sub>3</sub>SNa [M+Na]<sup>+</sup>: 324.0670).

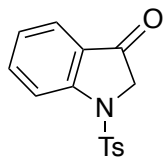

**12**

### 1-Tosylindolin-3-one (**12**)

21 mg, 7% yield. colorless solid; mp 170-174 °C; IR (CHCl<sub>3</sub>): 3019, 1719 cm<sup>-1</sup>; <sup>1</sup>H NMR (500 MHz, CDCl<sub>3</sub>) δ: 8.03 (d, *J* = 8.6 Hz, 1H), 7.71 (d, *J* = 8.0 Hz, 2H), 7.65 (t, *J* = 8.1 Hz, 2H), 7.26 (d, *J* = 8.0 Hz, 2H), 7.17 (t, *J* = 7.5 Hz, 1H), 4.13 (s, 2H), 2.38 (s, 3H); <sup>13</sup>C NMR (125 MHz, CDCl<sub>3</sub>) δ: 194.9, 153.7, 145.3, 137.4, 133.6, 130.2, 127.2, 125.1, 124.5, 124.1, 116.0, 56.2, 21.7; HRMS (ESI) *m/z*: 310.0517 (Calcd for C<sub>15</sub>H<sub>13</sub>NO<sub>3</sub>SNa [M+Na]<sup>+</sup>: 317.0514).

## 2. Supplementary References

(S1) Hodson, H. F.; Madge, D. J.; Slawin, A. N. Z.; Widdowson, D. A.; Williams, D. J. *Tetrahedron* **1994**, *50*, 1899.

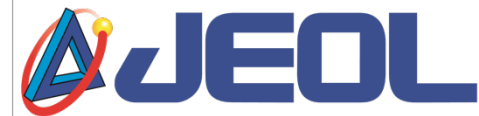

Filename = YT-20-01-31-1-4.jdf  
 Author = delta  
 Experiment = single\_pulse.ex2  
 Sample\_id = 0131  
 Solvent = CHLOROFORM-D  
 Creation\_time = 31-JAN-2020 12:40:42  
 Revision\_time = 31-JAN-2020 13:38:35  
 Current\_Time = 31-JAN-2020 13:38:43

Content = single\_pulse  
 Data format = 1D COMPLEX  
 Dim\_size = 13107  
 Dim\_title = 1H  
 Dim\_units = [ppm]  
 Dimensions = X  
 Site = ECA 500  
 Spectrometer = DELTA2\_NMR

Field\_strength = 11.62926421[T] (500[M]  
 X\_acq\_duration = 1.76422912[s]  
 X\_domain = 1H  
 X\_freq = 495.13191398[MHz]  
 X\_offset = 5[ppm]  
 X\_points = 16384  
 X\_prescans = 1  
 X\_resolution = 0.5668198[Hz]  
 X\_sweep = 9.28677563[kHz]  
 Irr\_domain = 1H  
 Irr\_freq = 495.13191398[MHz]  
 Irr\_offset = 5[ppm]  
 Tri\_domain = 1H  
 Tri\_freq = 495.13191398[MHz]  
 Tri\_offset = 5[ppm]  
 Clipped = FALSE  
 Mod\_return = 1  
 Scans = 8  
 Total\_scans = 8

X\_90\_width = 11.3[us]  
 X\_acq\_time = 1.76422912[s]  
 X\_angle = 45[deg]  
 X\_atn = 3.3[db]  
 X\_pulse = 5.65[us]  
 Irr\_mode = Off  
 Tri\_mode = Off  
 Dante\_presat = FALSE  
 Initial\_wait = 1[s]  
 Recvz\_gain = 36  
 Relaxation\_delay = 5[s]  
 Repetition\_time = 6.76422912[s]  
 Temp\_get = 23.7[dc]

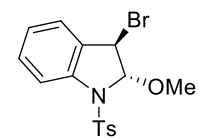

2a

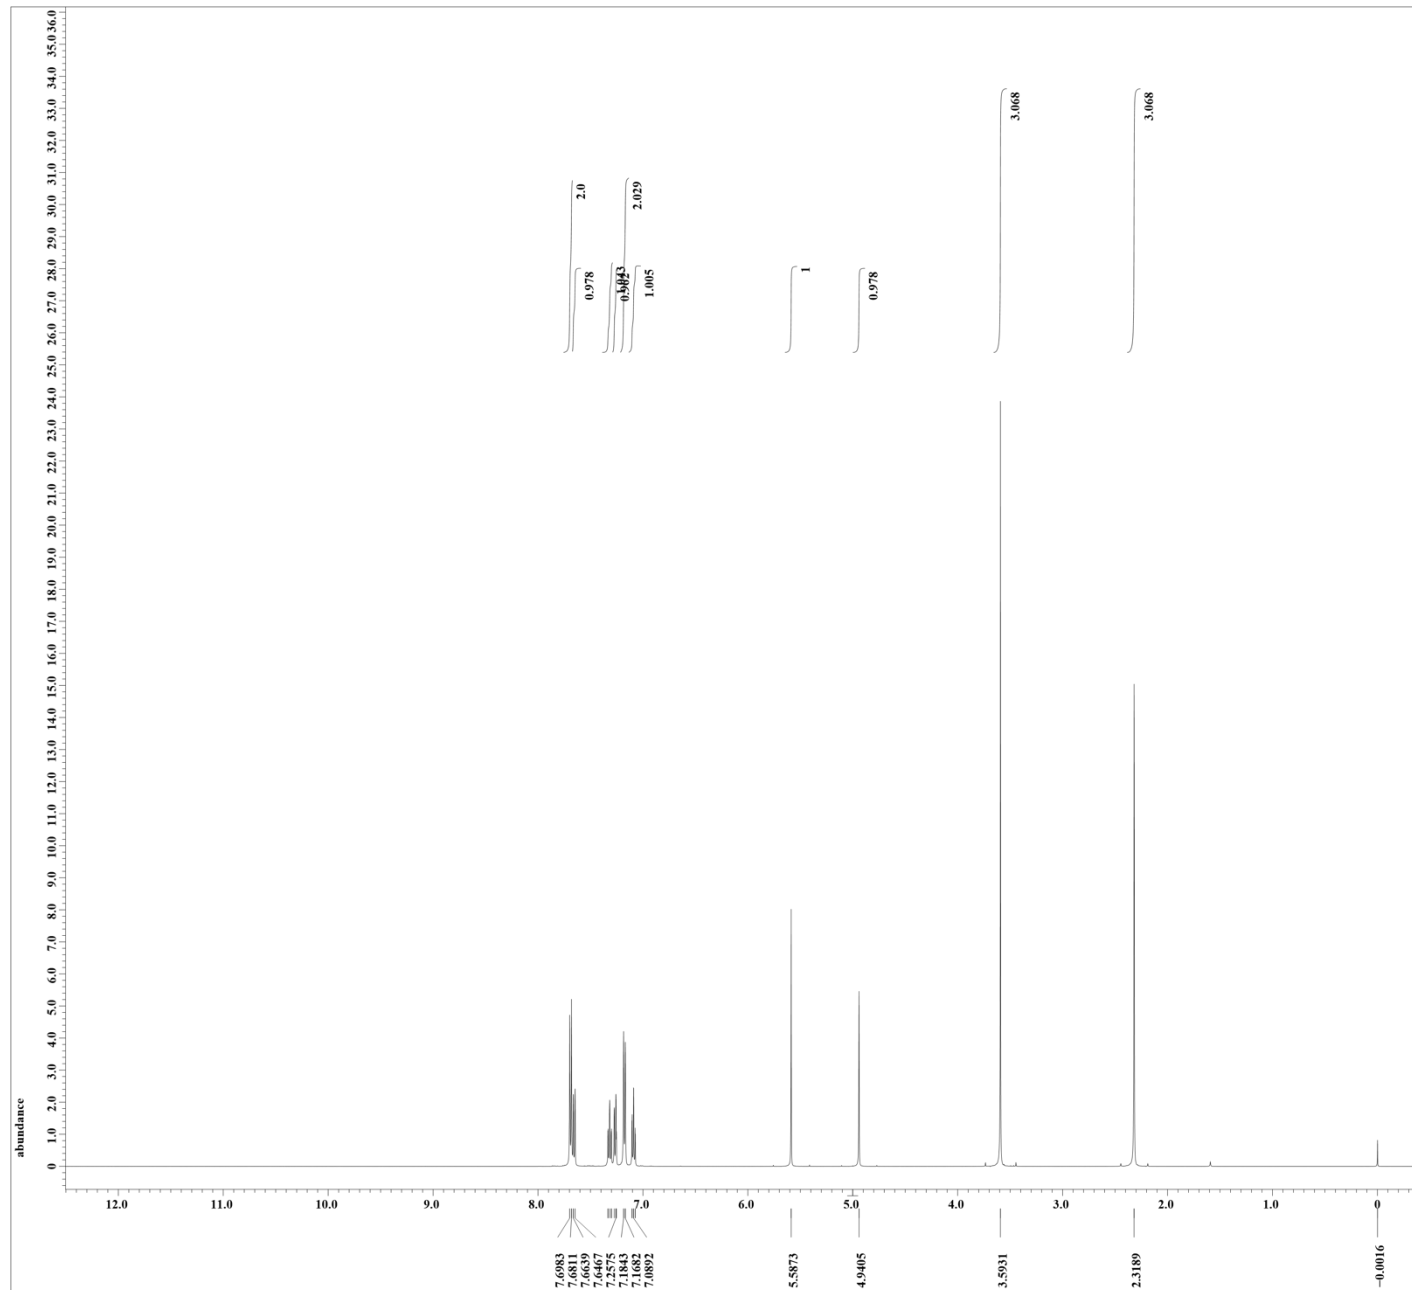

X : parts per Million : 1H

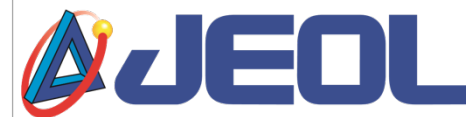

Filename = VT-20-01-31-1-3.jdf  
 Author = delta  
 Experiment = single\_pulse\_dec  
 Sample\_id = 0131  
 Solvent = CHLOROFORM-D  
 Creation\_time = 31-JAN-2020 13:26:17  
 Revision\_time = 31-JAN-2020 14:22:00  
 Current\_time = 31-JAN-2020 14:22:16

Content = single pulse decouple  
 Data format = 1D COMPLEX  
 Dim\_size = 26214  
 Dim\_title = 13C  
 Dim\_units = [ppm]  
 Dimensions = X  
 Site = ECA 500  
 Spectrometer = DELTA2\_NMR

Field\_strength = 11.62926421 [T] (500[M]  
 X\_acq\_duration = 0.8388608 [s]  
 X\_domain = 13C  
 X\_freq = 124.5010059 [MHz]  
 X\_offset = 100 [ppm]  
 X\_points = 32768  
 X\_prescans = 4  
 X\_resolution = 1.1920929 [Hz]  
 X\_sweep = 39.0625 [kHz]  
 Irr\_domain = 1H  
 Irr\_freq = 495.13191398 [MHz]  
 Irr\_offset = 5 [ppm]  
 Clipped = FALSE  
 Mod\_return = 1  
 Scans = 937.0  
 Total\_scans = 937.0

X\_90\_width = 10.1 [us]  
 X\_acq\_time = 0.8388608 [s]  
 X\_angle = 30 [deg]  
 X\_atn = 9.5 [dB]  
 X\_pulse = 3.36666667 [us]  
 Irr\_atn\_dec = 21.51 [dB]  
 Irr\_atn\_noe = 21.51 [dB]  
 Irr\_noise = WALTZ  
 Decoupling = TRUE  
 Initial\_wait = 1 [s]  
 Noe = TRUE  
 Noe\_time = 2 [s]  
 Recvr\_gain = 60  
 Relaxation\_delay = 2 [s]  
 Repetition\_time = 2.8388608 [s]  
 Temp\_get = 24.3 [dC]

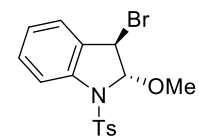

2a

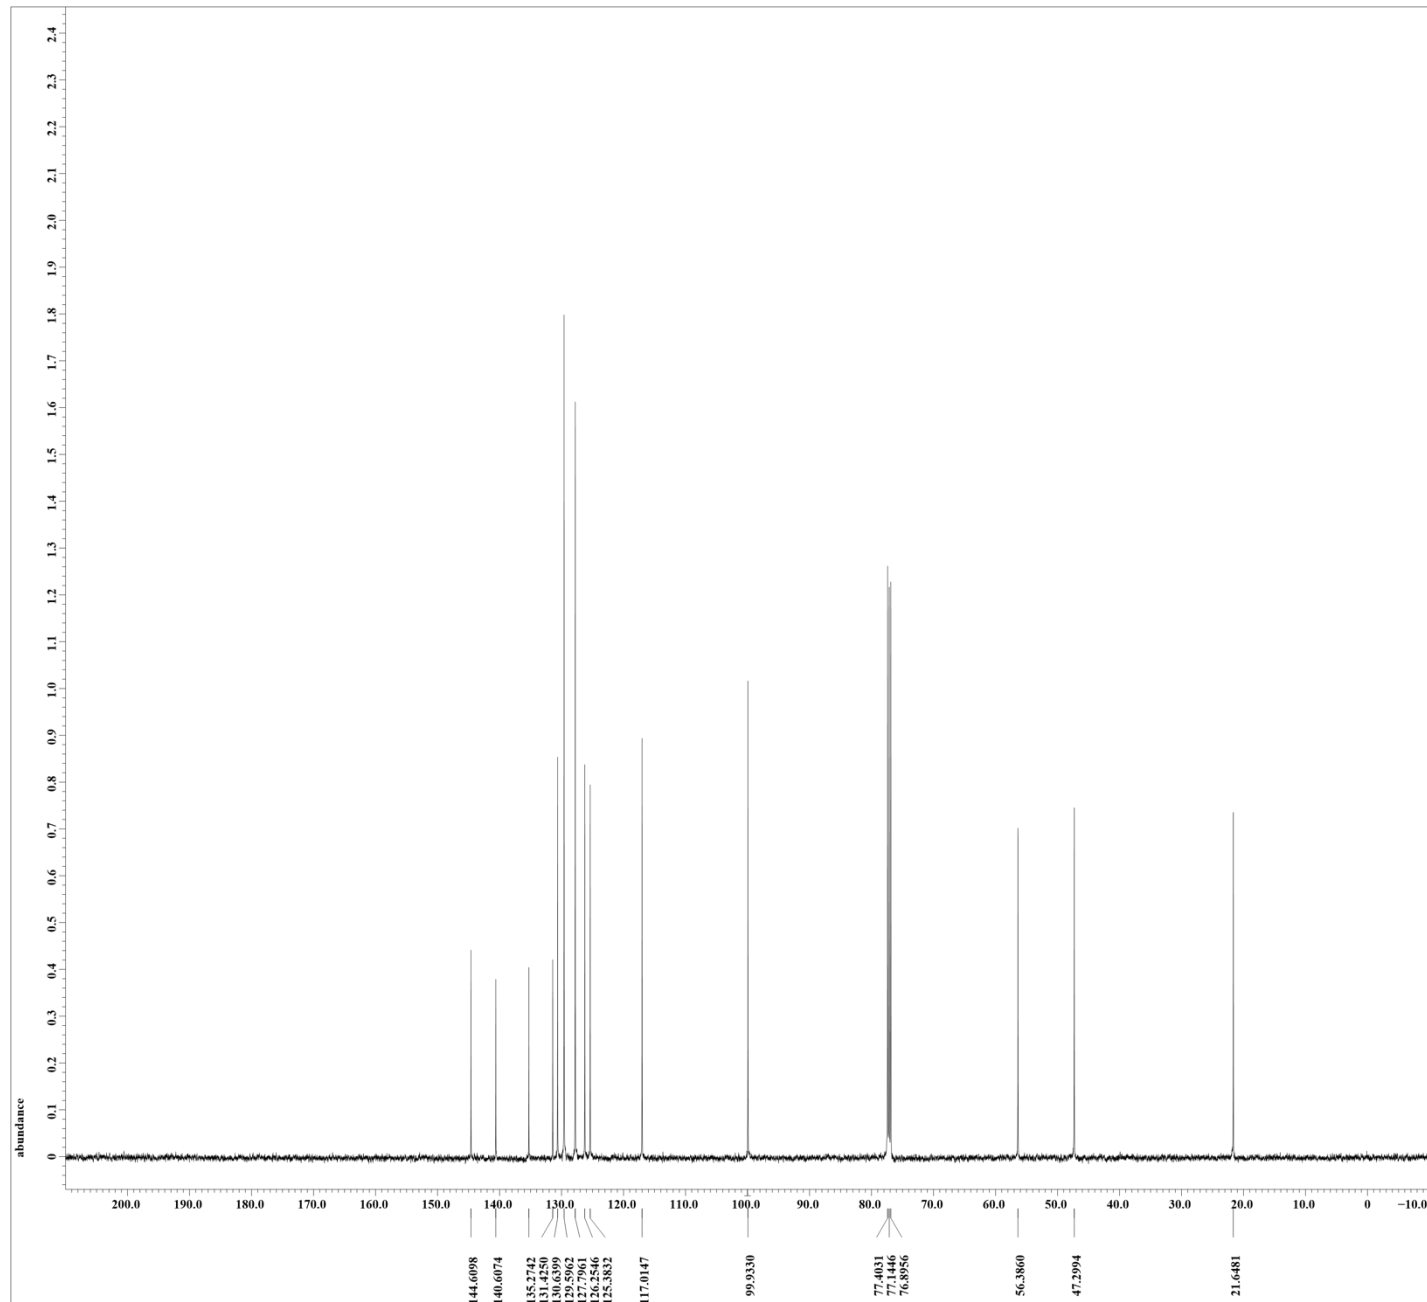

X : parts per Million : 13C

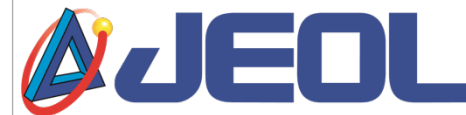

Filename = YT-20-01-27-1-20.jdf  
 Author = delta  
 Experiment = single\_pulse.ex2  
 Sample\_id = 0127  
 Solvent = CHLOROFORM-D  
 Creation\_time = 27-JAN-2020 10:10:03  
 Revision\_time = 30-JAN-2020 04:01:55  
 Current\_Time = 30-JAN-2020 04:02:11

Content = single\_pulse  
 Data format = 1D COMPLEX  
 Dim\_size = 13107  
 Dim\_title = 1H  
 Dim\_units = [ppm]  
 Dimensions = X  
 Site = ECA 500  
 Spectrometer = DELTA2\_NMR

Field\_strength = 11.62926421 [T] (500[M]  
 X\_acq\_duration = 1.76422912 [s]  
 X\_domain = 1H  
 X\_freq = 495.13191398 [MHz]  
 X\_offset = 5 [ppm]  
 X\_points = 16384  
 X\_prescans = 1  
 X\_resolution = 0.5668198 [Hz]  
 X\_sweep = 9.28677563 [kHz]  
 Irr\_domain = 1H  
 Irr\_freq = 495.13191398 [MHz]  
 Irr\_offset = 5 [ppm]  
 Tri\_domain = 1H  
 Tri\_freq = 495.13191398 [MHz]  
 Tri\_offset = 5 [ppm]  
 Clipped = FALSE  
 Mod\_return = 1  
 Scans = 8  
 Total\_scans = 8

X\_90\_width = 11.3 [us]  
 X\_acq\_time = 1.76422912 [s]  
 X\_angle = 45 [deg]  
 X\_atn = 3.3 [dB]  
 X\_pulse = 5.65 [us]  
 Irr\_mode = Off  
 Tri\_mode = Off  
 Dante\_presat = FALSE  
 Initial\_wait = 1 [s]  
 Recvz\_gain = 48  
 Relaxation\_delay = 5 [s]  
 Repetition\_time = 6.76422912 [s]  
 Temp\_get = 23.2 [dC]

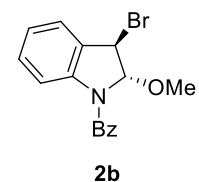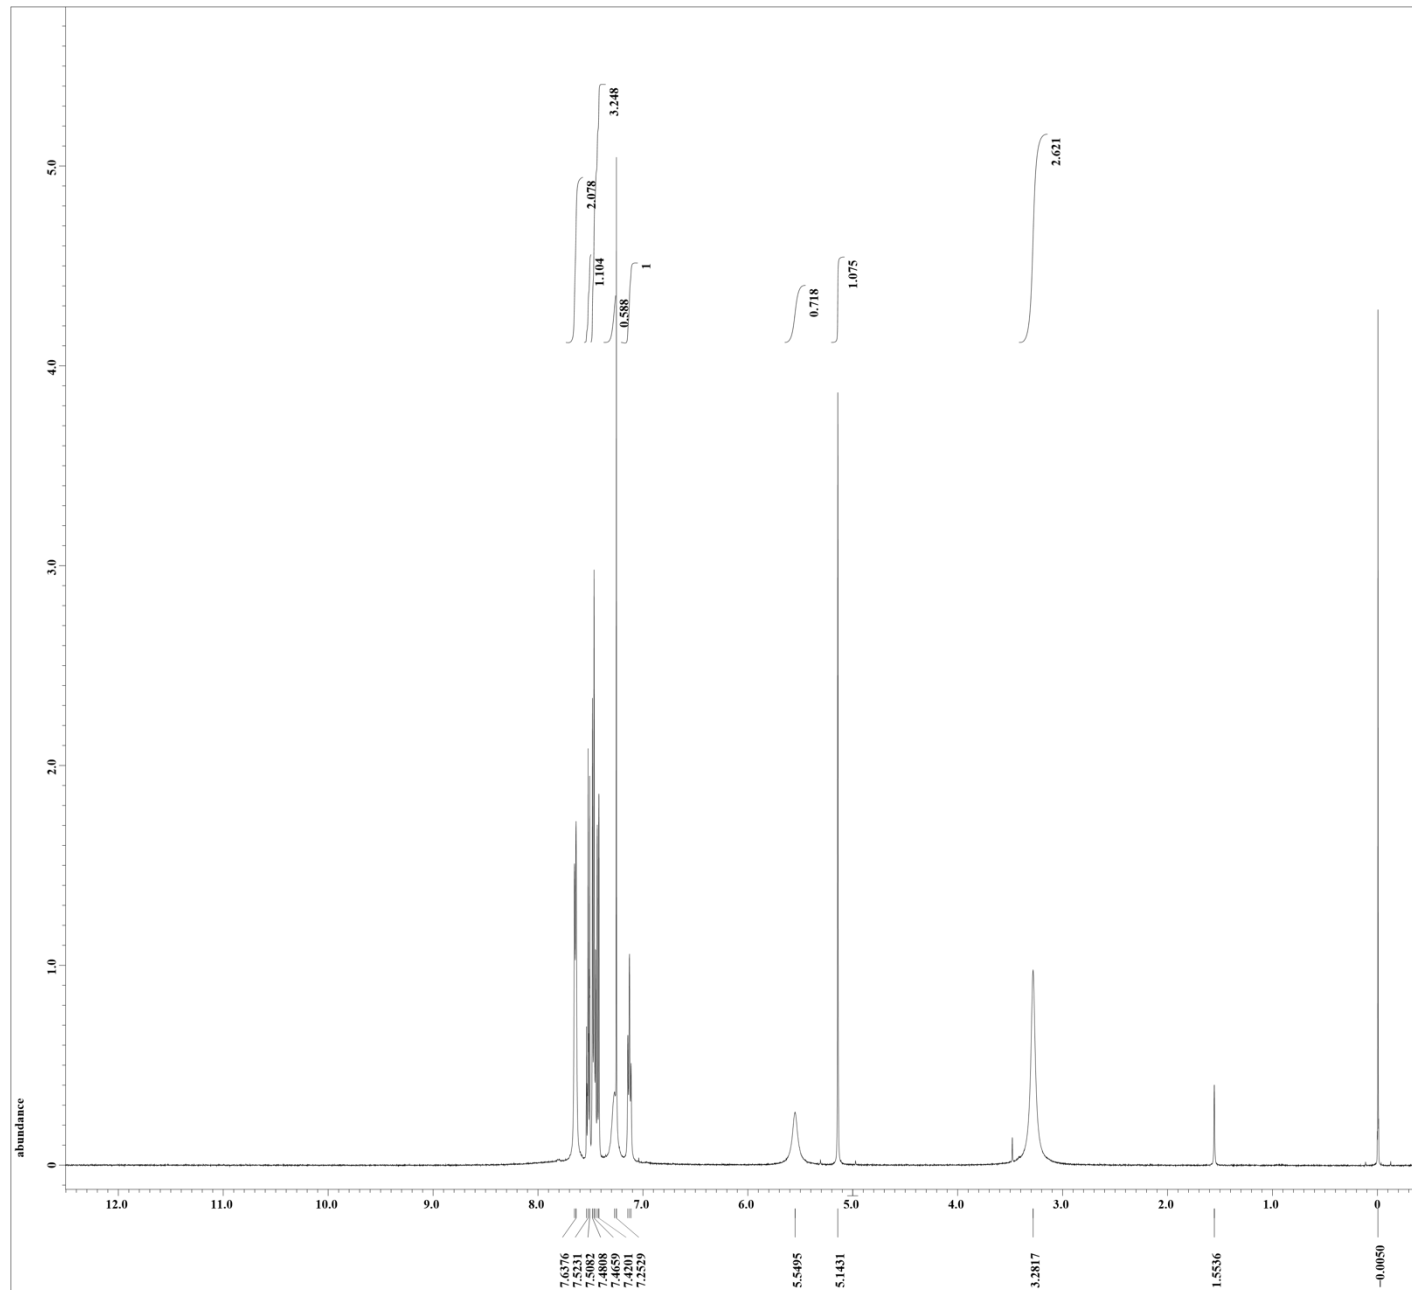

X : parts per Million : 1H



Filename = VT-20-01-27-1-16.jdf  
 Author = delta  
 Experiment = single\_pulse\_dec  
 Sample\_id = 0127  
 Solvent = CHLOROFORM-D  
 Creation\_time = 27-JAN-2020 12:52:34  
 Revision\_time = 31-JAN-2020 12:21:33  
 Current\_time = 31-JAN-2020 12:21:52

Content = single pulse decouple  
 Data format = 1D COMPLEX  
 Dim\_size = 26214  
 Dim\_title = 13C  
 Dim\_units = [ppm]  
 Dimensions = X  
 Site = ECA 500  
 Spectrometer = DELTA2\_NMR

Field\_strength = 11.62926421[T] (500[M]  
 X\_acq\_duration = 0.8388608[s]  
 X\_domain = 13C  
 X\_freq = 124.5010059[MHz]  
 X\_offset = 100[ppm]  
 X\_points = 32768  
 X\_prescans = 4  
 X\_resolution = 1.1920929[Hz]  
 X\_sweep = 39.0625[kHz]  
 Irr\_domain = 1H  
 Irr\_freq = 495.13191398[MHz]  
 Irr\_offset = 5[ppm]  
 Clipped = FALSE  
 Mod\_return = 1  
 Scans = 3407  
 Total\_scans = 3407

X\_90\_width = 10.1[us]  
 X\_acq\_time = 0.8388608[s]  
 X\_angle = 30[deg]  
 X\_atn = 9.5[dB]  
 X\_pulse = 3.36666667[us]  
 Irr\_atn\_dec = 21.51[dB]  
 Irr\_atn\_noe = 21.51[dB]  
 Irr\_noise = WALTZ  
 Decoupling = TRUE  
 Initial\_wait = 1[s]  
 Noe = TRUE  
 Noe\_time = 2[s]  
 Recvr\_gain = 60  
 Relaxation\_delay = 2[s]  
 Repetition\_time = 2.8388608[s]  
 Temp\_get = 23.8[dc]

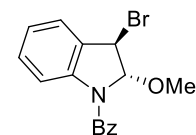

2b

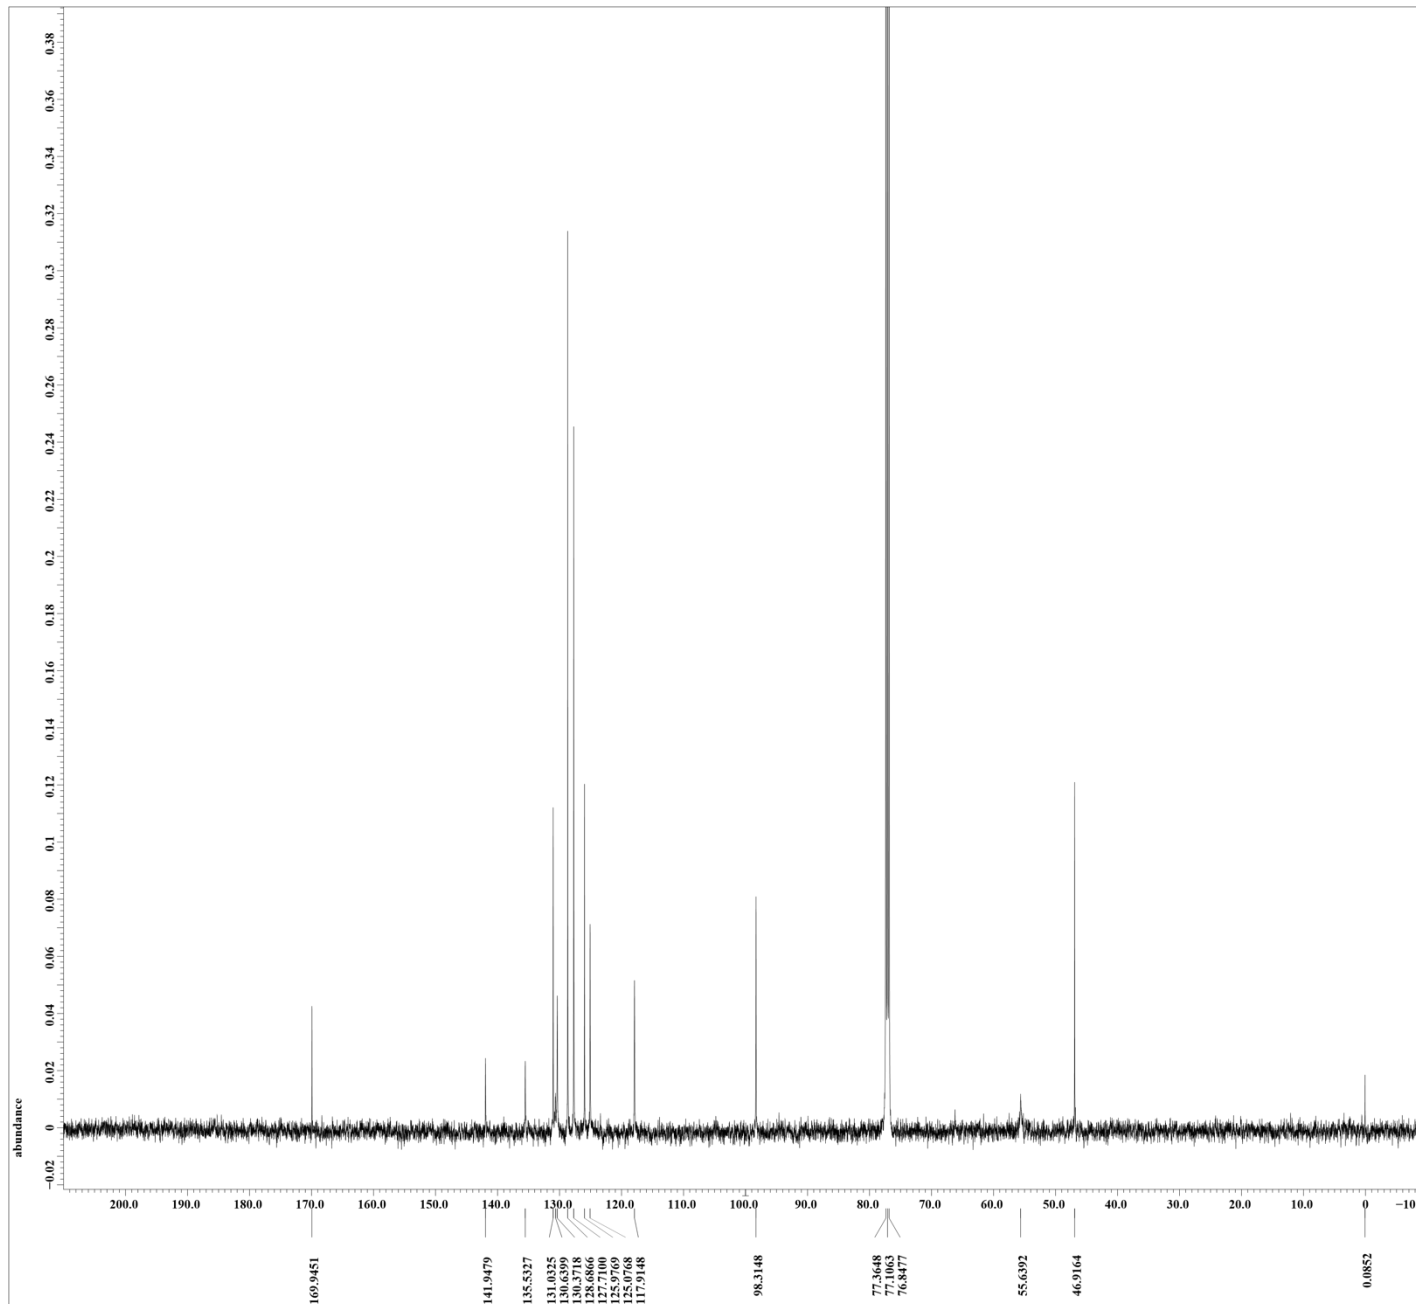



Filename = YT-20-01-27-6-13.jdf  
Author = delta  
Experiment = single\_pulse.ex2  
Sample\_id = 01276  
Solvent = CHLOROFORM-D  
Creation\_time = 27-JAN-2020 19:43:31  
Revision\_time = 30-JAN-2020 04:04:20  
Current\_time = 30-JAN-2020 04:05:38

Content = single\_pulse  
Data format = 1D COMPLEX  
Dim\_size = 13107  
Dim\_title = 1H  
Dim\_units = [ppm]  
Dimensions = X  
Site = ECA 500  
Spectrometer = DELTA2\_NMR

Field\_strength = 11.62926421 [T] (500[M]  
X\_acq\_duration = 1.76422912 [s]  
X\_domain = 1H  
X\_freq = 495.13191398 [MHz]  
X\_offset = 5 [ppm]  
X\_points = 16384  
X\_prescans = 1  
X\_resolution = 0.5668198 [Hz]  
X\_sweep = 9.28677563 [kHz]  
Irr\_domain = 1H  
Irr\_freq = 495.13191398 [MHz]  
Irr\_offset = 5 [ppm]  
Tri\_domain = 1H  
Tri\_freq = 495.13191398 [MHz]  
Tri\_offset = 5 [ppm]  
Clipped = FALSE  
Mod\_return = 1  
Scans = 8  
Total\_scans = 8

X\_90\_width = 11.3 [us]  
X\_acq\_time = 1.76422912 [s]  
X\_angle = 45 [deg]  
X\_atn = 3.3 [dB]  
X\_pulse = 5.65 [us]  
Irr\_mode = Off  
Tri\_mode = Off  
Dante\_presat = FALSE  
Initial\_wait = 1 [s]  
Recvr\_gain = 48  
Relaxation\_delay = 5 [s]  
Repetition\_time = 6.76422912 [s]  
Temp\_get = 23.4 [dC]

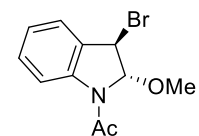

2d

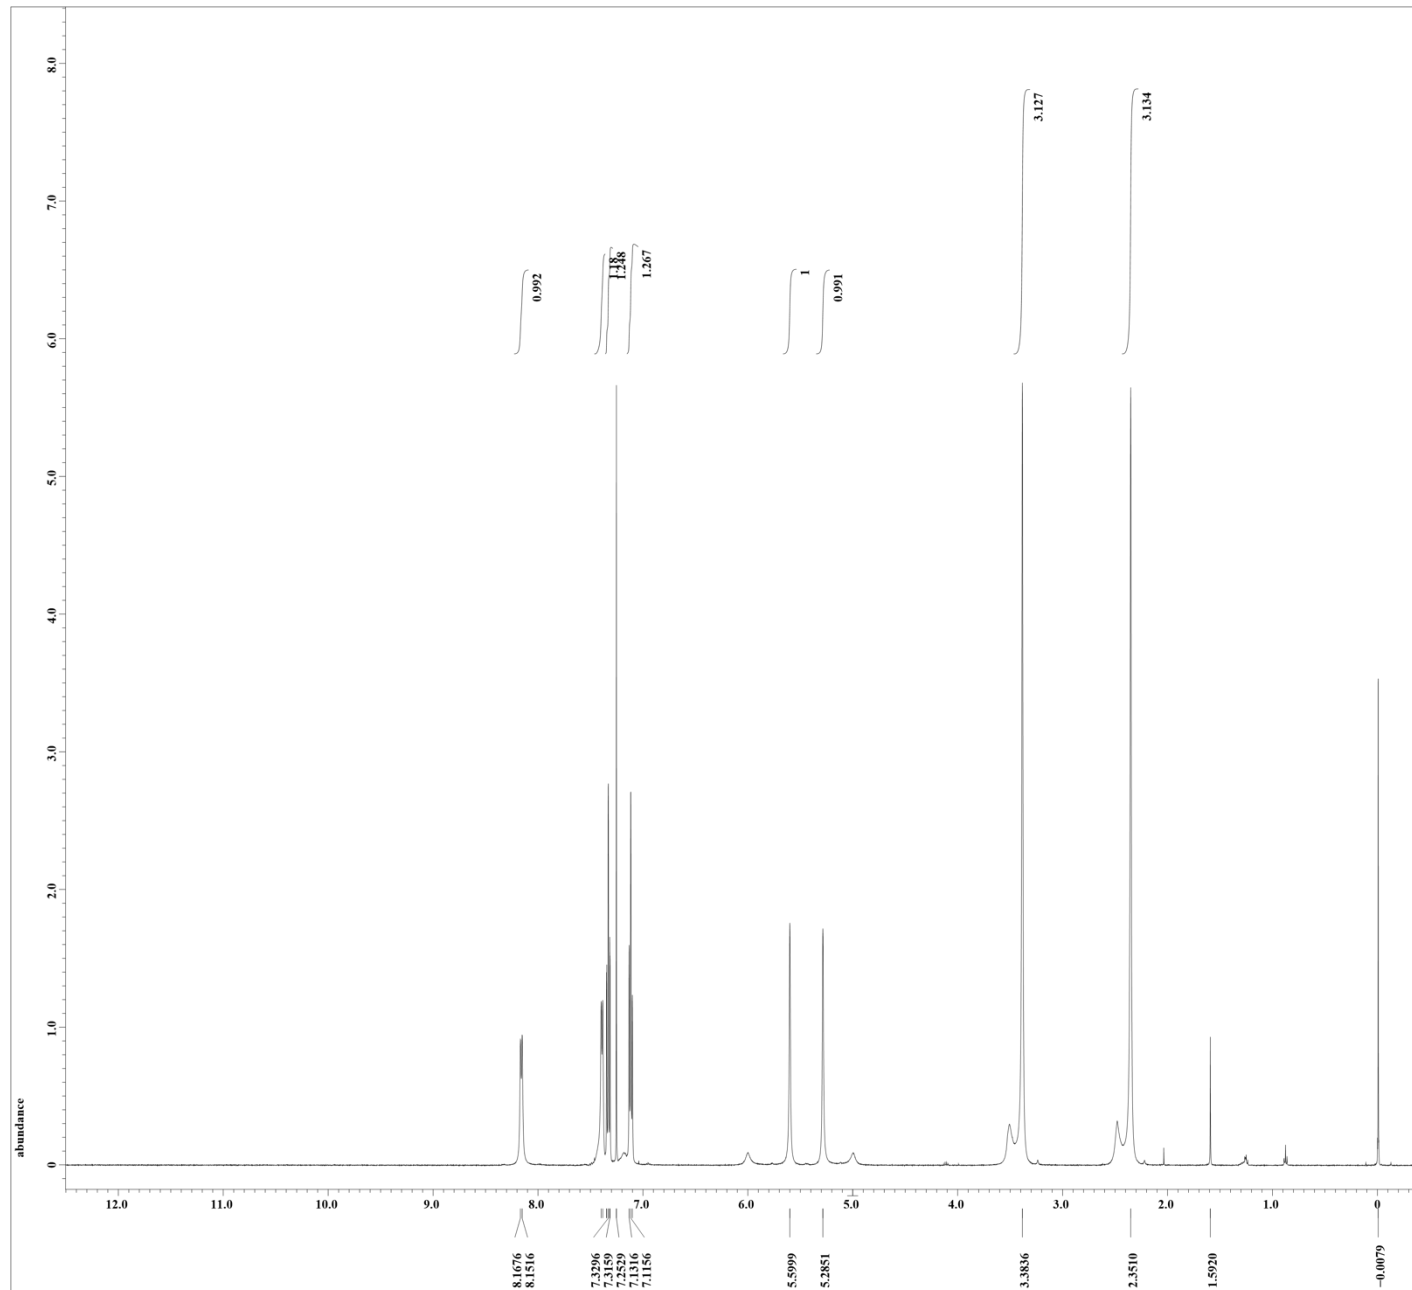

X : parts per Million : 1H



Filename = VT-20-01-27-6-12.jdf  
 Author = delta  
 Experiment = single\_pulse\_dec  
 Sample\_id = 01276  
 Solvent = CHLOROFORM-D  
 Creation\_time = 28-JAN-2020 08:22:30  
 Revision\_time = 30-JAN-2020 04:06:28  
 Current\_time = 30-JAN-2020 04:06:48

Content = single\_pulse\_decouple  
 Data\_format = 1D\_COMPLEX  
 Dim\_size = 26214  
 Dim\_title = 13C  
 Dim\_units = [ppm]  
 Dimensions = X  
 Site = ECA 500  
 Spectrometer = DELTA2\_NMR

Field\_strength = 11.62926421[T] (500[M]  
 X\_acq\_duration = 0.8388608[s]  
 X\_domain = 13C  
 X\_freq = 124.5010059[MHz]  
 X\_offset = 100[ppm]  
 X\_points = 32768  
 X\_prescans = 4  
 X\_resolution = 1.1920929[Hz]  
 X\_sweep = 39.0625[kHz]  
 Irr\_domain = 1H  
 Irr\_freq = 495.13191398[MHz]  
 Irr\_offset = 5[ppm]  
 Clipped = TRUE  
 Mod\_return = 1  
 Scans = 16016  
 Total\_scans = 16016

X\_90\_width = 10.1[us]  
 X\_acq\_time = 0.8388608[s]  
 X\_angle = 30[deg]  
 X\_atn = 9.5[dB]  
 X\_pulse = 3.36666667[us]  
 Irr\_atn\_dec = 21.51[dB]  
 Irr\_atn\_noe = 21.51[dB]  
 Irr\_noise = WALTZ  
 Decoupling = TRUE  
 Initial\_wait = 1[s]  
 Noe = TRUE  
 Noe\_time = 2[s]  
 Recvr\_gain = 60  
 Relaxation\_delay = 2[s]  
 Repetition\_time = 2.8388608[s]  
 Temp\_get = 23.8[dc]

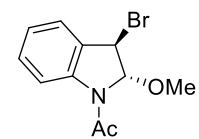

2d

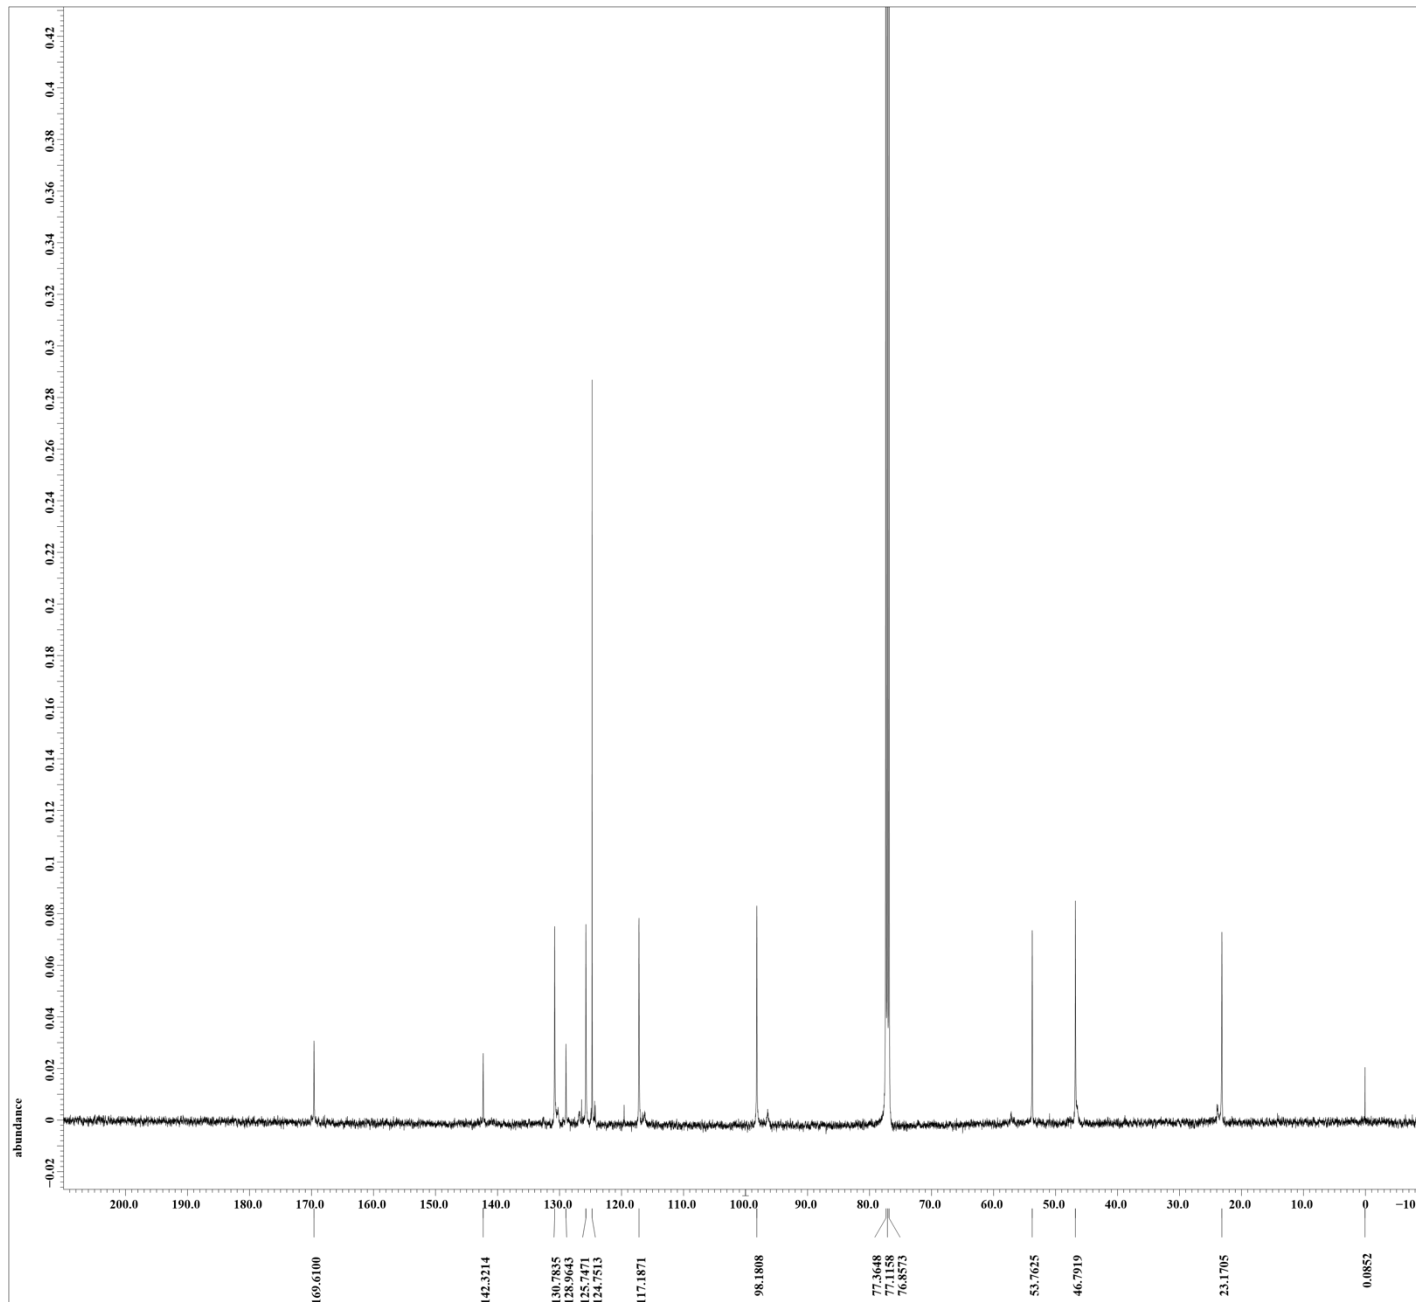

X : parts per Million : 13C





Filename = YT-20-01-29-6-5.jdf  
 Author = delta  
 Experiment = single\_pulse.ex2  
 Sample\_id = Na  
 Solvent = CHLOROFORM-D  
 Creation\_time = 29-JAN-2020 12:25:18  
 Revision\_time = 30-JAN-2020 03:16:22  
 Current\_time = 30-JAN-2020 03:16:37

Content = single\_pulse  
 Data format = 1D COMPLEX  
 Dim\_size = 13107  
 Dim\_title = 1H  
 Dim\_units = [ppm]  
 Dimensions = X  
 Site = ECA 500  
 Spectrometer = DELTA2\_NMR

Field\_strength = 11.62926421 [T] (500[M]  
 X\_acq\_duration = 1.76422912 [s]  
 X\_domain = 1H  
 X\_freq = 495.13191398 [MHz]  
 X\_offset = 5 [ppm]  
 X\_points = 16384  
 X\_prescans = 1  
 X\_resolution = 0.5668198 [Hz]  
 X\_sweep = 9.28677563 [kHz]  
 Irr\_domain = 1H  
 Irr\_freq = 495.13191398 [MHz]  
 Irr\_offset = 5 [ppm]  
 Tri\_domain = 1H  
 Tri\_freq = 495.13191398 [MHz]  
 Tri\_offset = 5 [ppm]  
 Clipped = FALSE  
 Mod\_return = 1  
 Scans = 8  
 Total\_scans = 8

X\_90\_width = 11.3 [us]  
 X\_acq\_time = 1.76422912 [s]  
 X\_angle = 45 [deg]  
 X\_atn = 3.3 [dB]  
 X\_pulse = 5.65 [us]  
 Irr\_mode = Off  
 Tri\_mode = Off  
 Dante\_presat = FALSE  
 Initial\_wait = 1 [s]  
 Recvz\_gain = 50  
 Relaxation\_delay = 5 [s]  
 Repetition\_time = 6.76422912 [s]  
 Temp\_get = 23.5 [dC]

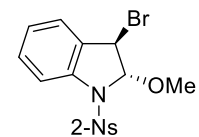

2e

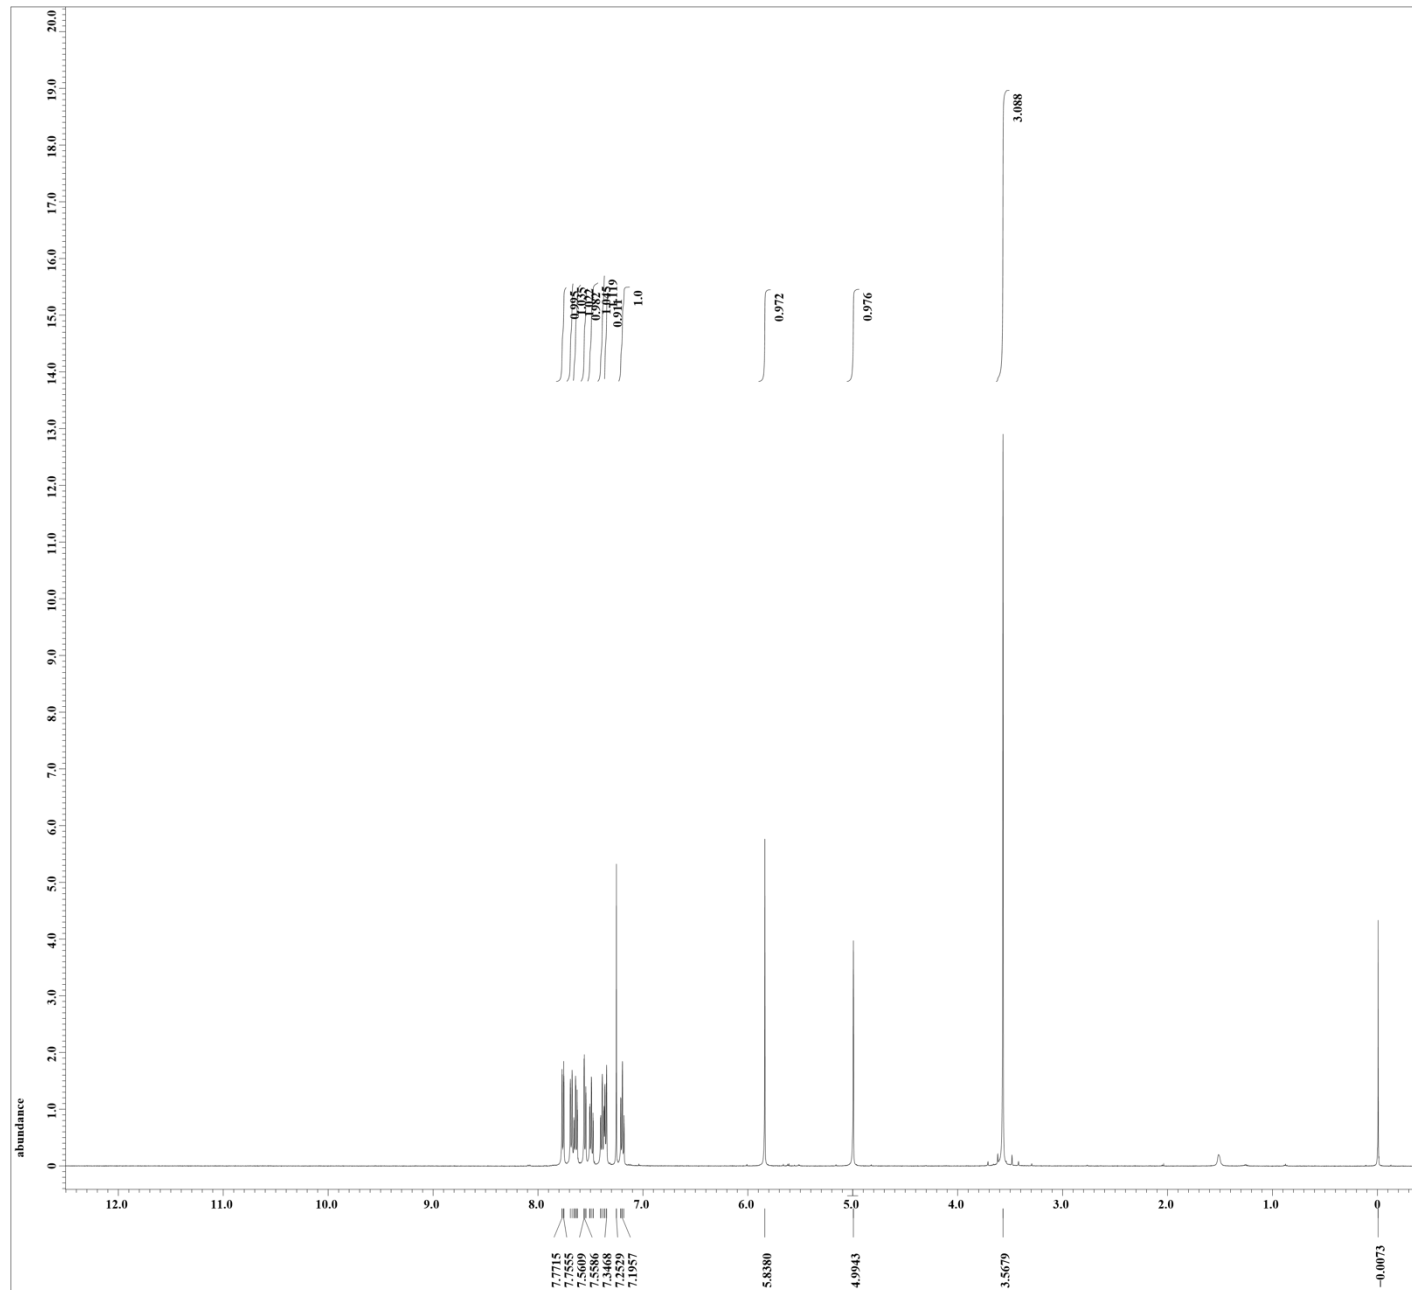

X : parts per Million : 1H



Filename = VT-20-01-29-6-4.jdf  
 Author = delta  
 Experiment = single\_pulse\_dec  
 Sample\_id = Na  
 Solvent = CHLOROFORM-D  
 Creation\_time = 29-JAN-2020 14:34:10  
 Revision\_time = 30-JAN-2020 03:19:30  
 Current\_time = 30-JAN-2020 03:19:40

Content = single pulse decouple  
 Data format = 1D COMPLEX  
 Dim\_size = 26214  
 Dim\_title = 13C  
 Dim\_units = [ppm]  
 Dimensions = X  
 Site = ECA 500  
 Spectrometer = DELTA2\_NMR

Field\_strength = 11.62926421[T] (500[M]  
 X\_acq\_duration = 0.8388608[s]  
 X\_domain = 13C  
 X\_freq = 124.5010059[MHz]  
 X\_offset = 100[ppm]  
 X\_points = 32768  
 X\_prescans = 4  
 X\_resolution = 1.1920929[Hz]  
 X\_sweep = 39.0625[kHz]  
 Irr\_domain = 1H  
 Irr\_freq = 495.13191398[MHz]  
 Irr\_offset = 5[ppm]  
 Clipped = FALSE  
 Mod\_return = 1  
 Scans = 2695  
 Total\_scans = 2695

X\_90\_width = 10.1[us]  
 X\_acq\_time = 0.8388608[s]  
 X\_angle = 30[deg]  
 X\_atn = 9.5[dB]  
 X\_pulse = 3.36666667[us]  
 Irr\_atn\_dec = 21.51[dB]  
 Irr\_atn\_noe = 21.51[dB]  
 Irr\_noise = WALTZ  
 Decoupling = TRUE  
 Initial\_wait = 1[s]  
 Noe = TRUE  
 Noe\_time = 2[s]  
 Recv\_gain = 60  
 Relaxation\_delay = 2[s]  
 Repetition\_time = 2.8388608[s]  
 Temp\_get = 24.3[dc]

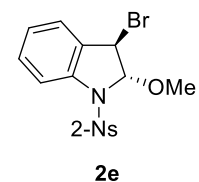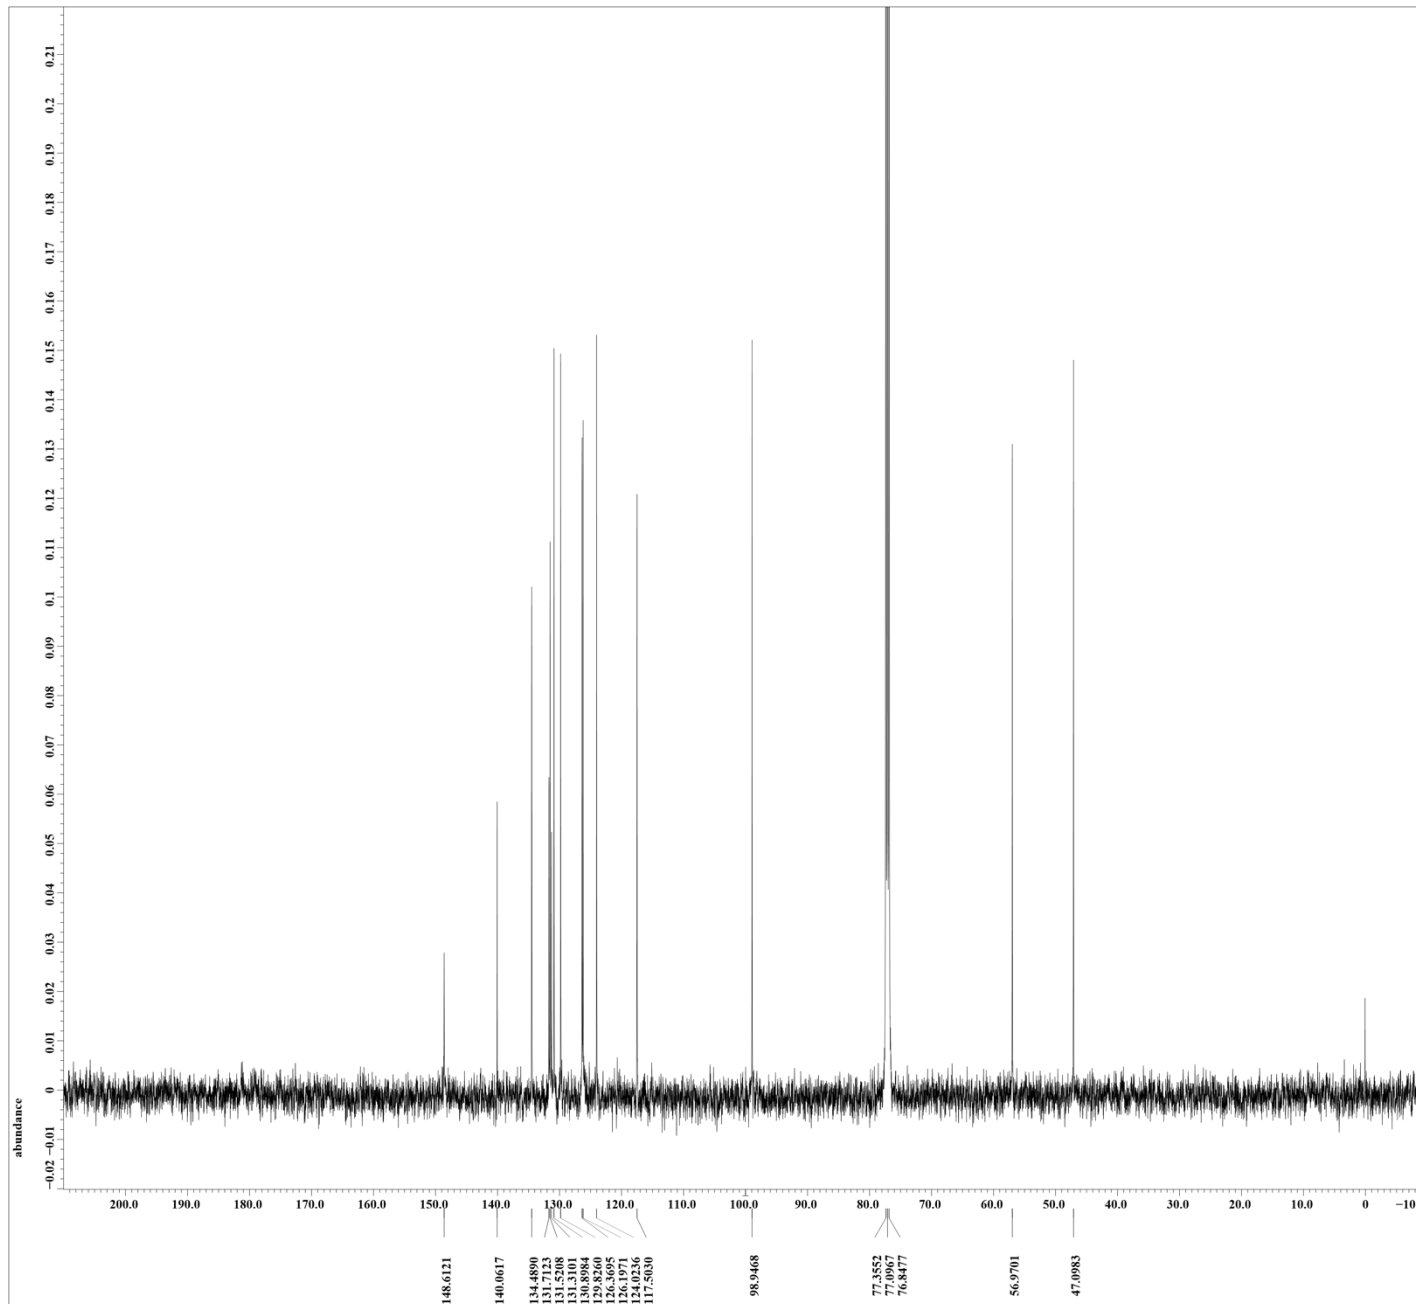



Filename = YT-20-01-14-2-6.jdf  
 Author = delta  
 Experiment = single\_pulse.ex2  
 Sample\_id = 50Me  
 Solvent = CHLOROFORM-D  
 Creation\_time = 14-JAN-2020 08:36:25  
 Revision\_time = 30-JAN-2020 03:27:56  
 Current\_time = 30-JAN-2020 03:28:29

Content = single\_pulse  
 Data format = 1D COMPLEX  
 Dim\_size = 13107  
 Dim\_title = 1H  
 Dim\_units = [ppm]  
 Dimensions = X  
 Site = ECA 500  
 Spectrometer = DELTA2\_NMR

Field\_strength = 11.62926421[T] (500[M]  
 X\_acq\_duration = 1.76422912[s]  
 X\_domain = 1H  
 X\_freq = 495.13191398[MHz]  
 X\_offset = 5[ppm]  
 X\_points = 16384  
 X\_prescans = 1  
 X\_resolution = 0.5668198[Hz]  
 X\_sweep = 9.28677563[kHz]  
 Irr\_domain = 1H  
 Irr\_freq = 495.13191398[MHz]  
 Irr\_offset = 5[ppm]  
 Tri\_domain = 1H  
 Tri\_freq = 495.13191398[MHz]  
 Tri\_offset = 5[ppm]  
 Clipped = FALSE  
 Mod\_return = 1  
 Scans = 8  
 Total\_scans = 8

X\_90\_width = 11.3[us]  
 X\_acq\_time = 1.76422912[s]  
 X\_angle = 45[deg]  
 X\_atn = 3.3[db]  
 X\_pulse = 5.65[us]  
 Irr\_mode = Off  
 Tri\_mode = Off  
 Dante\_presat = FALSE  
 Initial\_wait = 1[s]  
 Recvz\_gain = 50  
 Relaxation\_delay = 5[s]  
 Repetition\_time = 6.76422912[s]  
 Temp\_get = 23[dc]

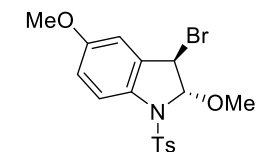

2f

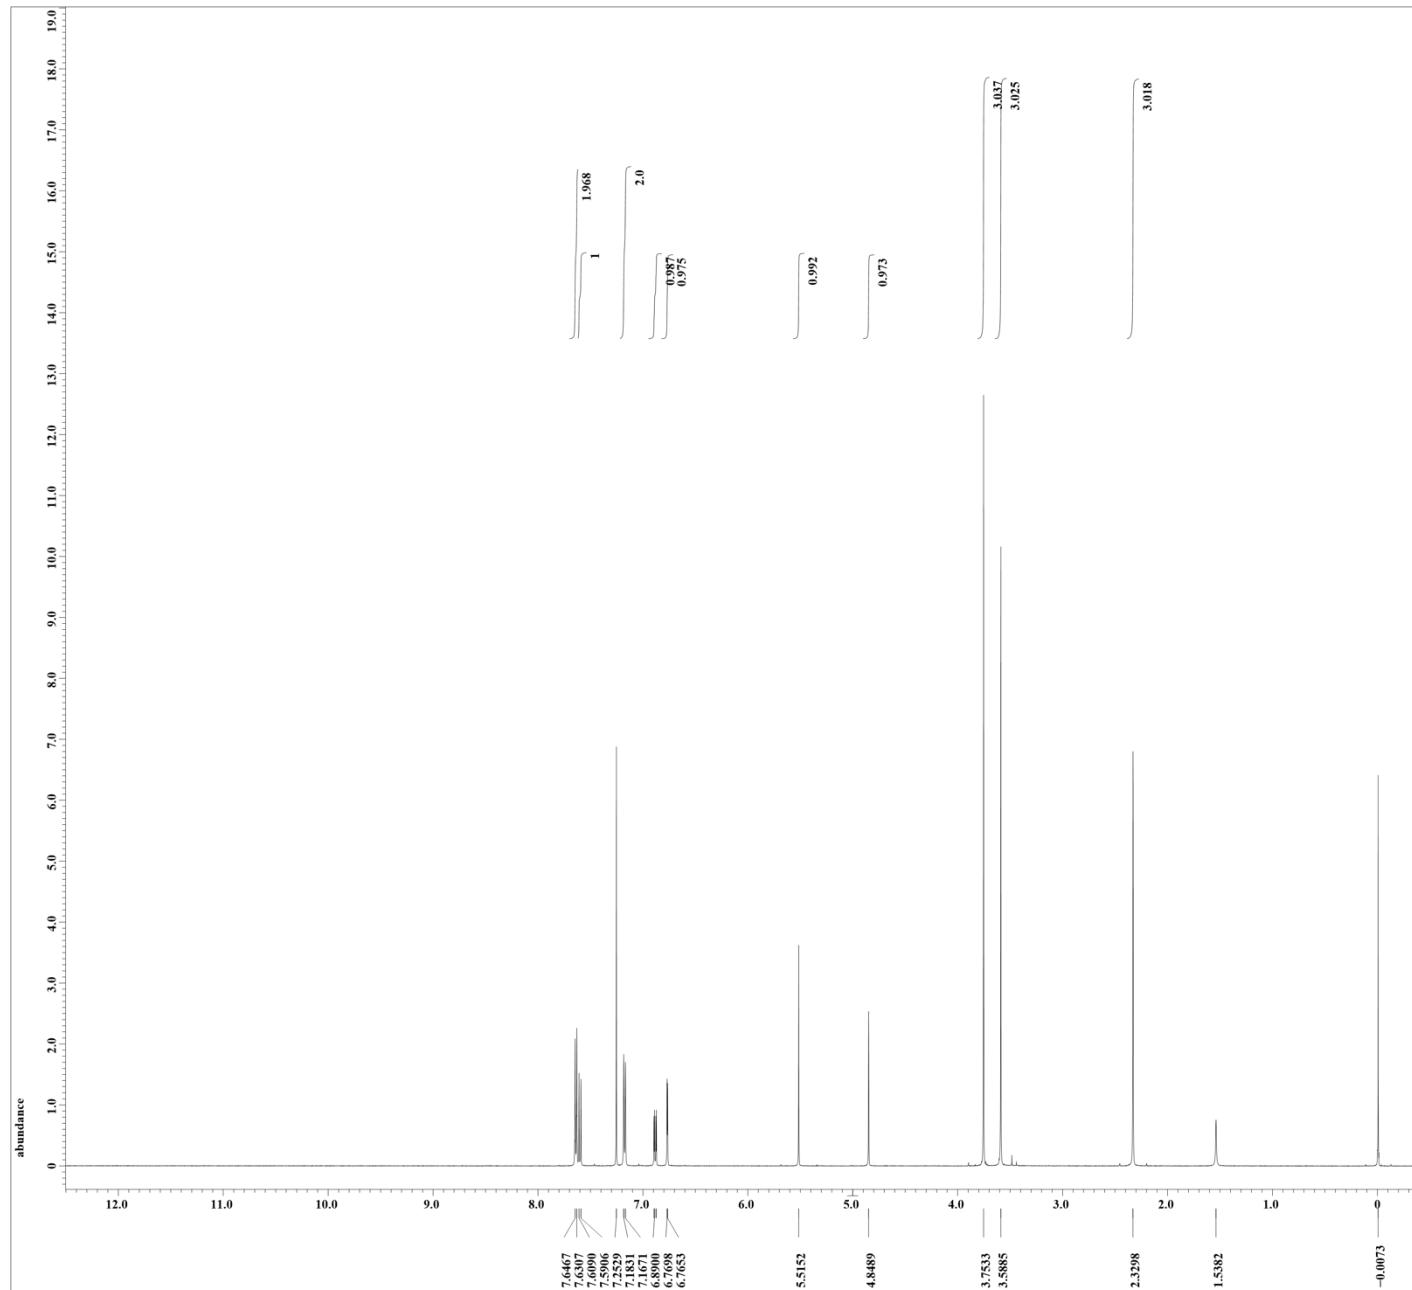

X : parts per Million : 1H



```

Filename      = VT-20-01-28-6-2.jdf
Author        = delta
Experiment     = single_pulse_dec
Sample_id      = 50Me
Solvent        = CHLOROFORM-D
Creation_time  = 28-JAN-2020 15:30:56
Revision_time  = 30-JAN-2020 03:29:31
Current_time   = 30-JAN-2020 03:30:51

Content        = single pulse decouple
Data format    = 1D COMPLEX
Dim_size       = 26214
Dim_title      = 13C
Dim_units      = [ppm]
Dimensions     = X
Site           = ECA 500
Spectrometer   = DELTA2_NMR

Field_strength = 11.62926421[T] (500[M]
X_acq_duration = 0.8388608[s]
X_domain       = 13C
X_freq         = 124.5010059[MHz]
X_offset       = 100[ppm]
X_points       = 32768
X_prescans     = 4
X_resolution   = 1.1920929[Hz]
X_sweep        = 39.0625[kHz]
Irr_domain     = 1H
Irr_freq       = 495.13191398[MHz]
Irr_offset     = 5[ppm]
Clipped        = FALSE
Mod_return     = 1
Scans          = 871
Total_scans    = 871

X_90_width     = 10.1[us]
X_acq_time     = 0.8388608[s]
X_angle        = 30[deg]
X_atn          = 9.5[dB]
X_pulse        = 3.36666667[us]
Irr_atn_dec    = 21.51[dB]
Irr_atn_noe    = 21.51[dB]
Irr_noise      = WALZ
Decoupling     = TRUE
Initial_wait   = 1[s]
Noe            = TRUE
Noe_time       = 2[s]
Recvr_gain     = 60
Relaxation_delay = 2[s]
Repetition_time = 2.8388608[s]
Temp_get       = 24.1[dc]
  
```

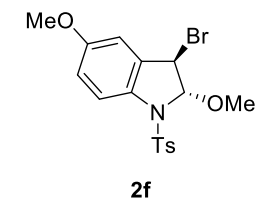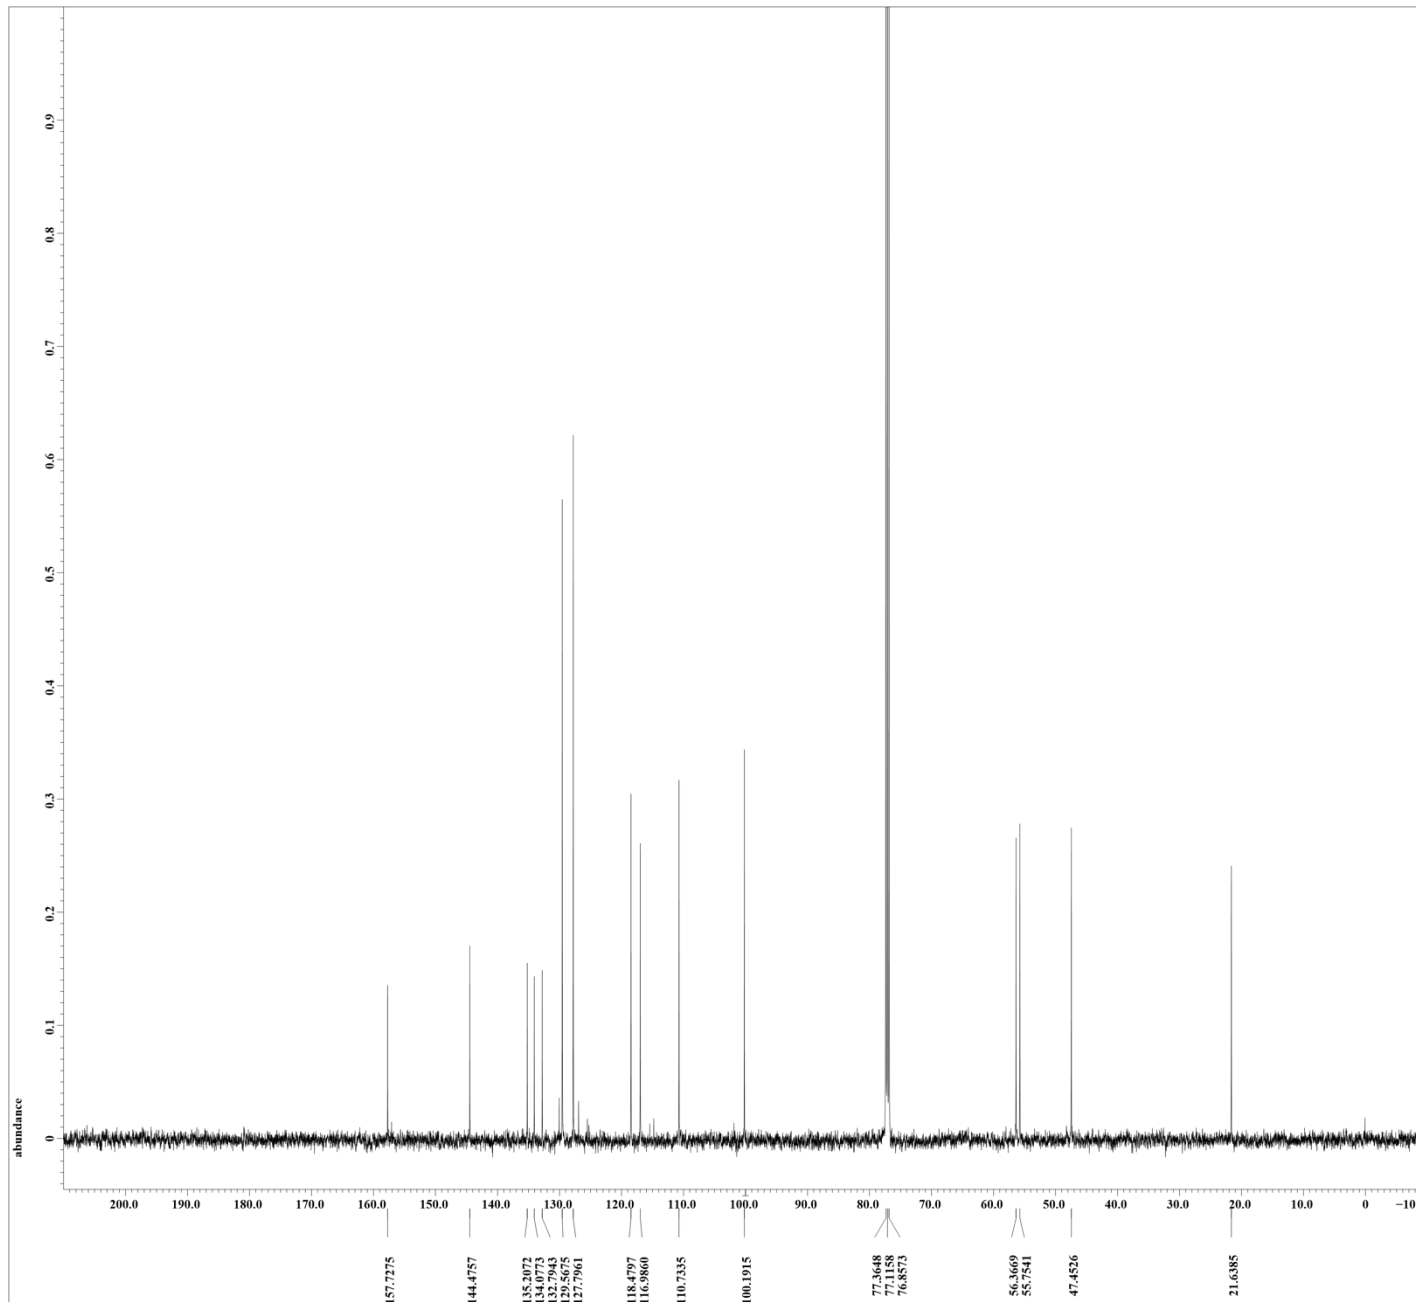

X : parts per Million : 13C

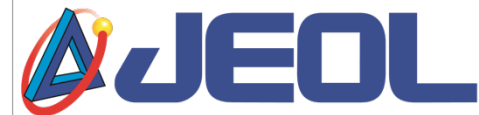

```

Filename      = YT-20-01-16-6-5.jdf
Author       = delta
Experiment   = single_pulse.ex2
Sample_id    = 5C1
Solvent      = CHLOROFORM-D
Creation_time = 16-JAN-2020 18:36:53
Revision_time = 30-JAN-2020 03:36:44
Current_Time = 30-JAN-2020 03:36:54

Content      = single_pulse
Data format  = 1D COMPLEX
Dim_size     = 13107
Dim_title    = 1H
Dim_units    = [ppm]
Dimensions   = X
Site         = ECA 500
Spectrometer = DELTA2_NMR

Field_strength = 11.62926421[T] (500[M]
X_acq_duration = 1.76422912[s]
X_domain       = 1H
X_freq         = 495.13191398[MHz]
X_offset       = 5[ppm]
X_points       = 16384
X_prescans     = 1
X_resolution   = 0.5668198[Hz]
X_sweep        = 9.28677563[kHz]
Irr_domain     = 1H
Irr_freq       = 495.13191398[MHz]
Irr_offset     = 5[ppm]
Tri_domain     = 1H
Tri_freq       = 495.13191398[MHz]
Tri_offset     = 5[ppm]
Clipped        = FALSE
Mod_return     = 1
Scans          = 8
Total_scans    = 8

X_90_width     = 11.3[us]
X_acq_time      = 1.76422912[s]
X_angle         = 45[deg]
X_atn           = 3.3[db]
X_pulse         = 5.65[us]
Irr_mode        = Off
Tri_mode        = Off
Dante_presat    = FALSE
Initial_wait    = 1[s]
Recvr_gain      = 48
Relaxation_delay = 5[s]
Repetition_time = 6.76422912[s]
Temp_get        = 23.2[dc]
  
```

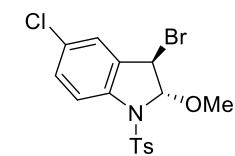

**2g**

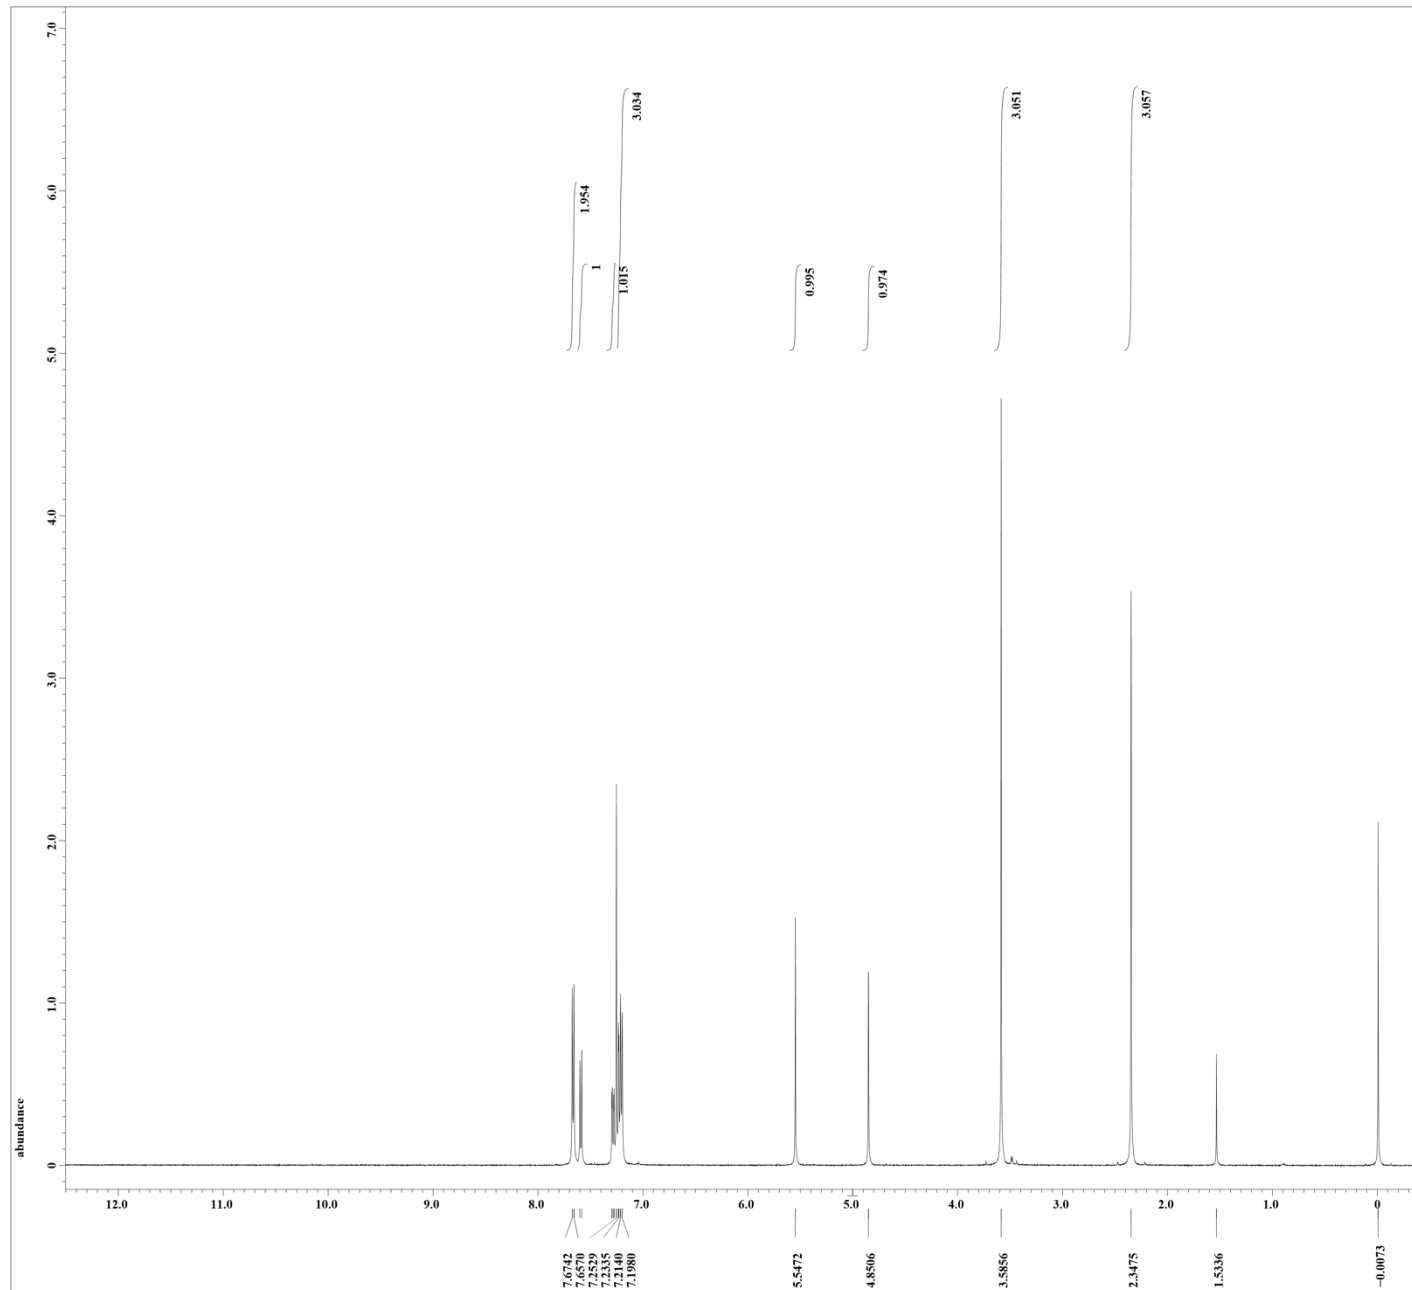

X : parts per Million : 1H



```

Filename      = YT-20-01-28-5-2.jdf
Author        = delta
Experiment    = single_pulse_dec
Sample_id     = 5C1
Solvent       = CHLOROFORM-D
Creation_time  = 28-JAN-2020 14:44:39
Revision_time = 30-JAN-2020 03:38:09
Current_time  = 30-JAN-2020 03:38:21

Content       = single pulse decouple
Data format   = 1D COMPLEX
Dim_size      = 26214
Dim_title     = 13C
Dim_units     = [ppm]
Dimensions    = X
Site          = ECA 500
Spectrometer  = DELTA2_NMR

Field_strength = 11.62926421[T] (500[M]
X_acq_duration = 0.8388608[s]
X_domain       = 13C
X_freq         = 124.5010059[MHz]
X_offset       = 100[ppm]
X_points       = 32768
X_prescans     = 4
X_resolution   = 1.1920929[Hz]
X_sweep        = 39.0625[kHz]
X_atn          = 1H
Irr_domain     = 495.13191398[MHz]
Irr_offset     = 5[ppm]
Clipped        = FALSE
Mod_return     = 1
Scans          = 783
Total_scans    = 783

X_90_width     = 10.1[us]
X_acq_time     = 0.8388608[s]
X_angle        = 30[deg]
X_atn          = 9.5[dB]
X_pulse        = 3.36666667[us]
Irr_atn_dec    = 21.51[dB]
Irr_atn_noe    = 21.51[dB]
Irr_noise      = WALTZ
Decoupling     = TRUE
Initial_wait   = 1[s]
Noe            = TRUE
Noe_time       = 2[s]
Recvr_gain     = 60
Relaxation_delay = 2[s]
Repetition_time = 2.8388608[s]
Temp_get       = 24[dc]
  
```

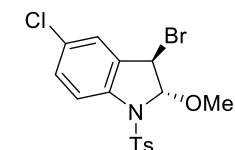

**2g**

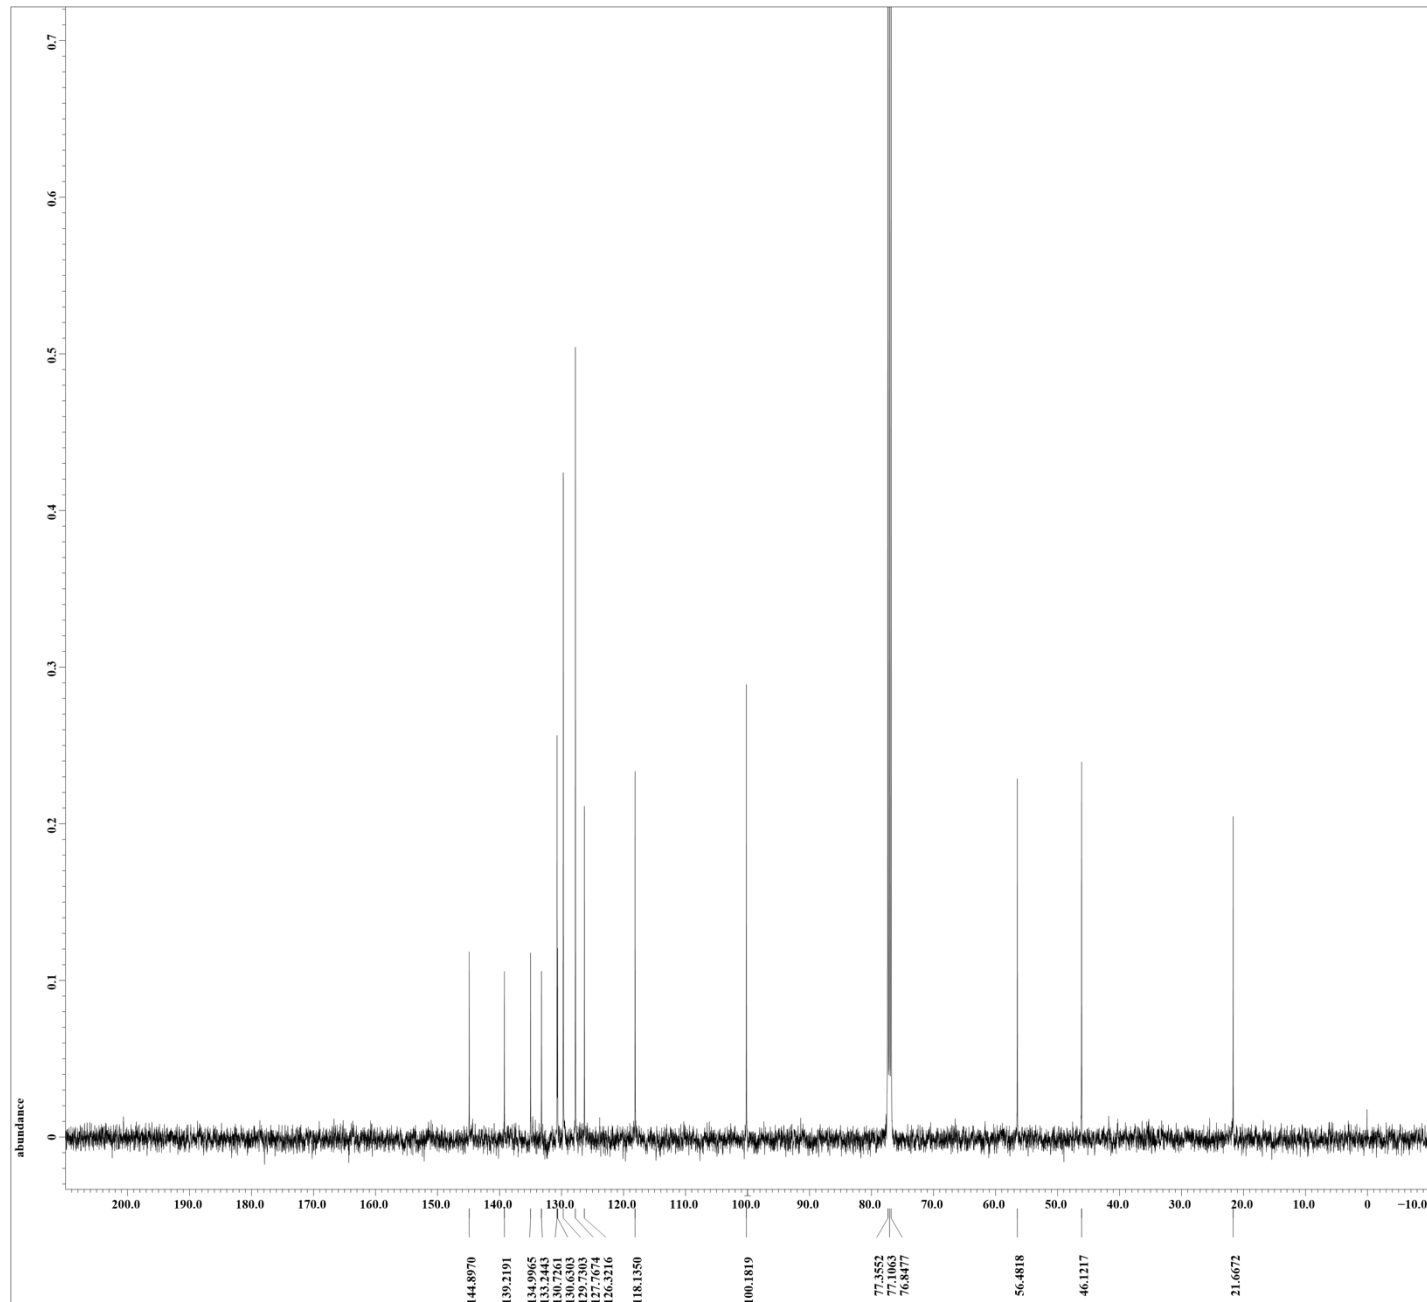

X : parts per Million : 13C



Filename = YT-20-01-14-3-8.jdf  
 Author = delta  
 Experiment = single\_pulse.ex2  
 Sample\_id = 5Br  
 Solvent = CHLOROFORM-D  
 Creation\_time = 14-JAN-2020 12:31:44  
 Revision\_time = 30-JAN-2020 03:21:41  
 Current\_Time = 30-JAN-2020 03:21:52

Content = single\_pulse  
 Data format = 1D COMPLEX  
 Dim\_size = 13107  
 Dim\_title = 1H  
 Dim\_units = [ppm]  
 Dimensions = X  
 Site = ECA 500  
 Spectrometer = DELTA2\_NMR

Field\_strength = 11.62926421 [T] (500[M]  
 X\_acq\_duration = 1.76422912 [s]  
 X\_domain = 1H  
 X\_freq = 495.13191398 [MHz]  
 X\_offset = 5 [ppm]  
 X\_points = 16384  
 X\_prescans = 1  
 X\_resolution = 0.5668198 [Hz]  
 X\_sweep = 9.28677563 [kHz]  
 Irr\_domain = 1H  
 Irr\_freq = 495.13191398 [MHz]  
 Irr\_offset = 5 [ppm]  
 Tri\_domain = 1H  
 Tri\_freq = 495.13191398 [MHz]  
 Tri\_offset = 5 [ppm]  
 Clipped = FALSE  
 Mod\_return = 1  
 Scans = 8  
 Total\_scans = 8

X\_90\_width = 11.3 [us]  
 X\_acq\_time = 1.76422912 [s]  
 X\_angle = 45 [deg]  
 X\_atn = 3.3 [dB]  
 X\_pulse = 5.65 [us]  
 Irr\_mode = Off  
 Tri\_mode = Off  
 Dante\_presat = FALSE  
 Initial\_wait = 1 [s]  
 Recvz\_gain = 50  
 Relaxation\_delay = 5 [s]  
 Repetition\_time = 6.76422912 [s]  
 Temp\_get = 23.1 [dC]

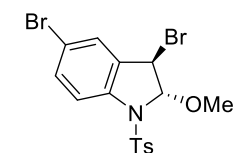

2h

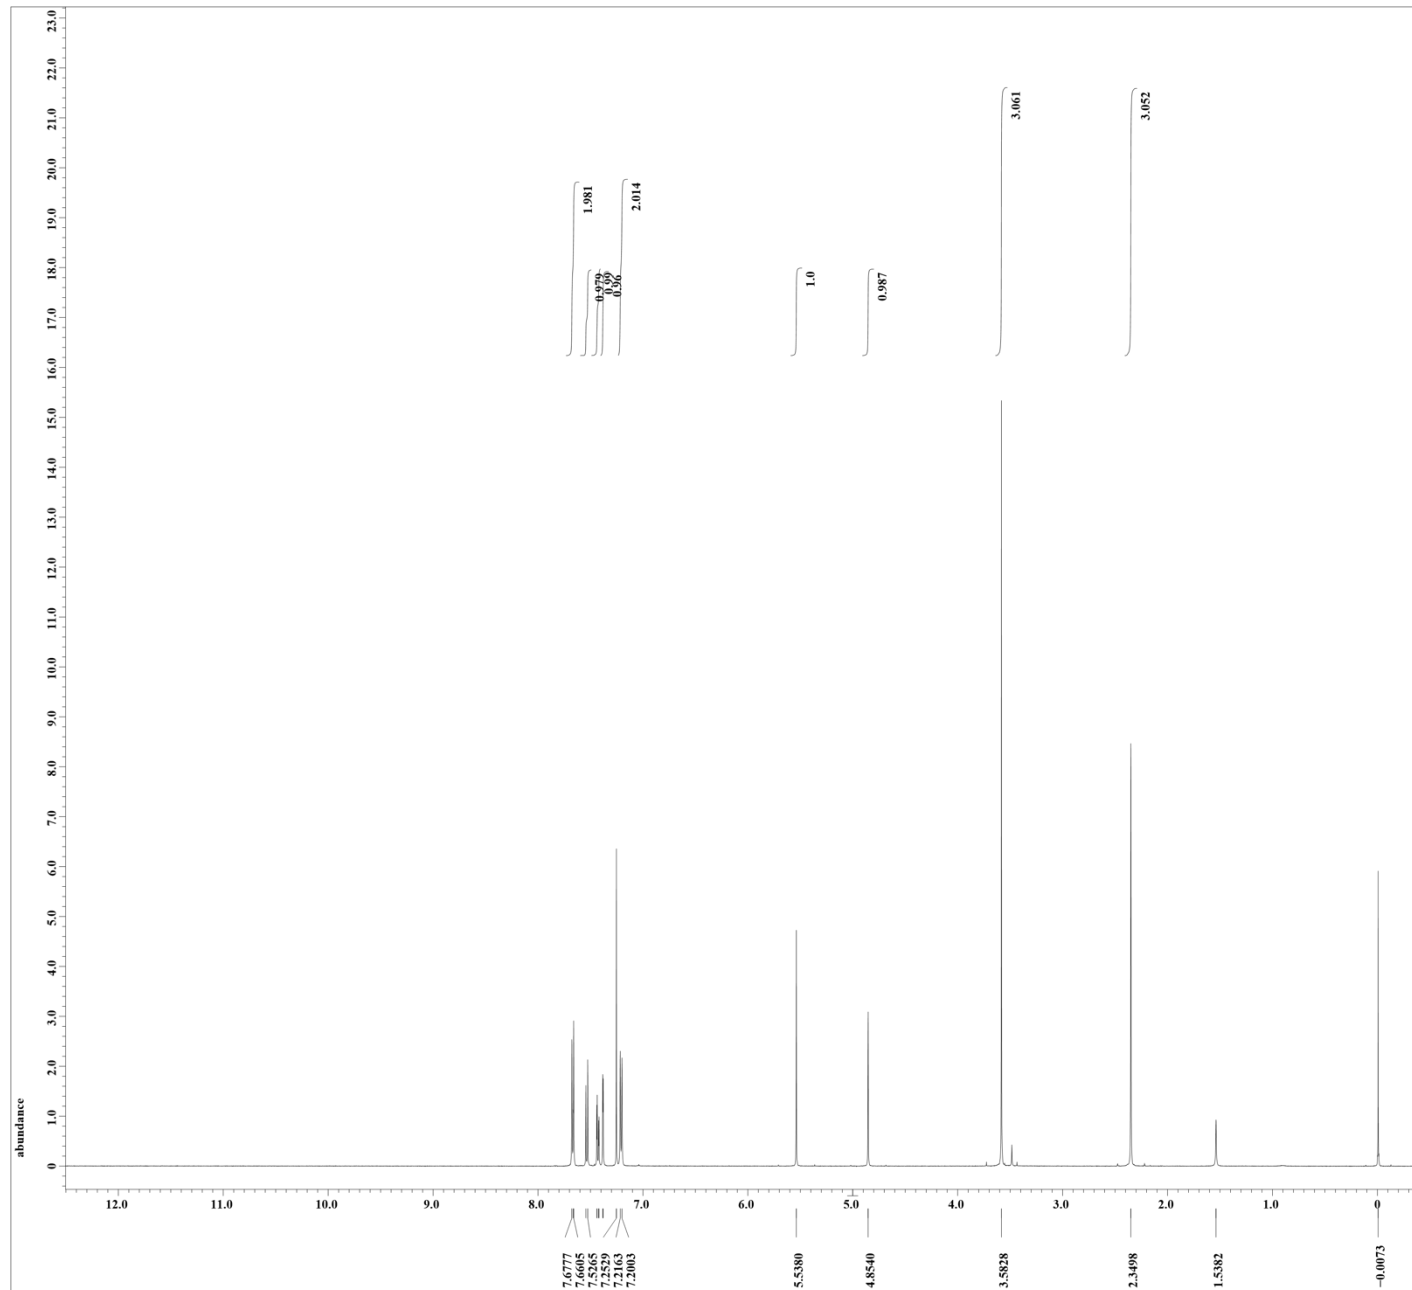

X : parts per Million : 1H



```

Filename      = YT-20-01-14-3-6.jdf
Author        = delta
Experiment    = single_pulse_dec
Sample_id     = 5Br
Solvent       = CHLOROFORM-D
Creation_time  = 14-JAN-2020 14:07:42
Revision_time  = 30-JAN-2020 03:22:35
Current_Time  = 30-JAN-2020 03:22:49

Content       = single pulse decouple
Data format   = 1D COMPLEX
Dim_size      = 26214
Dim_title     = 13C
Dim_units     = [ppm]
Dimensions    = X
Site          = ECA 500
Spectrometer  = DELTA2_NMR

Field_strength = 11.62926421[T] (500[M]
X_acq_duration = 0.8388608[s]
X_domain       = 13C
X_freq         = 124.5010059[MHz]
X_offset       = 100[ppm]
X_points       = 32768
X_prescans     = 4
X_resolution   = 1.1920929[Hz]
X_sweep        = 39.0625[kHz]
Irr_domain     = 1H
Irr_freq       = 495.13191398[MHz]
Irr_offset     = 5[ppm]
Clipped        = FALSE
Mod_return     = 1
Scans          = 2000
Total_scans    = 2000

X_90_width    = 10.1[us]
X_acq_time     = 0.8388608[s]
X_angle        = 30[deg]
X_atn          = 9.5[dB]
X_pulse        = 3.36666667[us]
Irr_atn_dec    = 21.51[dB]
Irr_atn_noe    = 21.51[dB]
Irr_noise      = WALTZ
Decoupling     = TRUE
Initial_wait   = 1[s]
Noe            = TRUE
Noe_time       = 2[s]
Recvr_gain     = 60
Relaxation_delay = 2[s]
Repetition_time = 2.8388608[s]
Temp_get       = 23.9[dc]
  
```

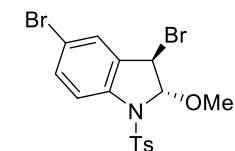

2h

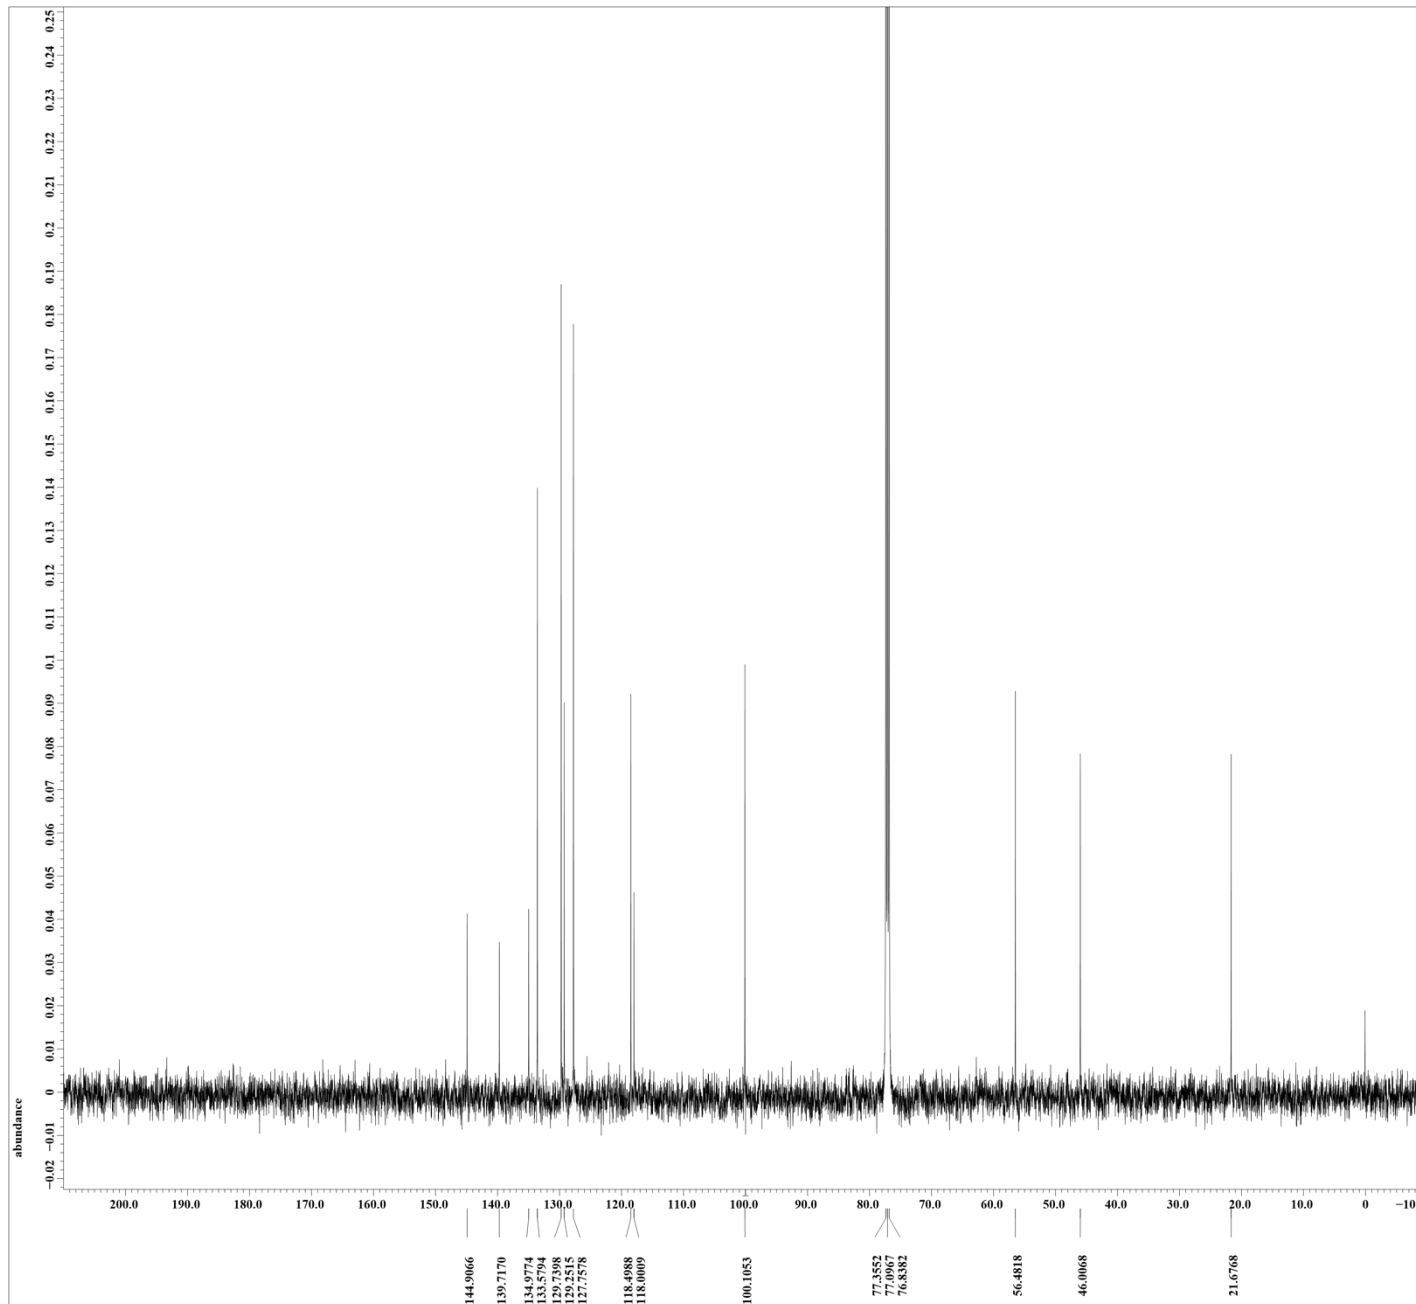

X : parts per Million : 13C





Filename = YT-20-01-18-4-9.jdf  
 Author = delta  
 Experiment = single\_pulse.ex2  
 Sample\_id = 4C1  
 Solvent = CHLOROFORM-D  
 Creation\_time = 18-JAN-2020 16:45:13  
 Revision\_time = 30-JAN-2020 03:34:21  
 Current\_time = 30-JAN-2020 03:34:35

Content = single\_pulse  
 Data format = 1D COMPLEX  
 Dim\_size = 13107  
 Dim\_title = 1H  
 Dim\_units = [ppm]  
 Dimensions = X  
 Site = ECA 500  
 Spectrometer = DELTA2\_NMR

Field\_strength = 11.62926421 [T] (500[M]  
 X\_acq\_duration = 1.76422912 [s]  
 X\_domain = 1H  
 X\_freq = 495.13191398 [MHz]  
 X\_offset = 5 [ppm]  
 X\_points = 16384  
 X\_prescans = 1  
 X\_resolution = 0.5668198 [Hz]  
 X\_sweep = 9.28677563 [kHz]  
 Irr\_domain = 1H  
 Irr\_freq = 495.13191398 [MHz]  
 Irr\_offset = 5 [ppm]  
 Tri\_domain = 1H  
 Tri\_freq = 495.13191398 [MHz]  
 Tri\_offset = 5 [ppm]  
 Clipped = TRUE  
 Mod\_return = 1  
 Scans = 8  
 Total\_scans = 8

X\_90\_width = 11.3 [us]  
 X\_acq\_time = 1.76422912 [s]  
 X\_angle = 45 [deg]  
 X\_atn = 3.3 [dB]  
 X\_pulse = 5.65 [us]  
 Irr\_mode = Off  
 Tri\_mode = Off  
 Dante\_presat = FALSE  
 Initial\_wait = 1 [s]  
 Recvz\_gain = 50  
 Relaxation\_delay = 5 [s]  
 Repetition\_time = 6.76422912 [s]  
 Temp\_get = 23.3 [dC]

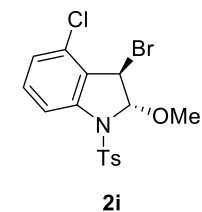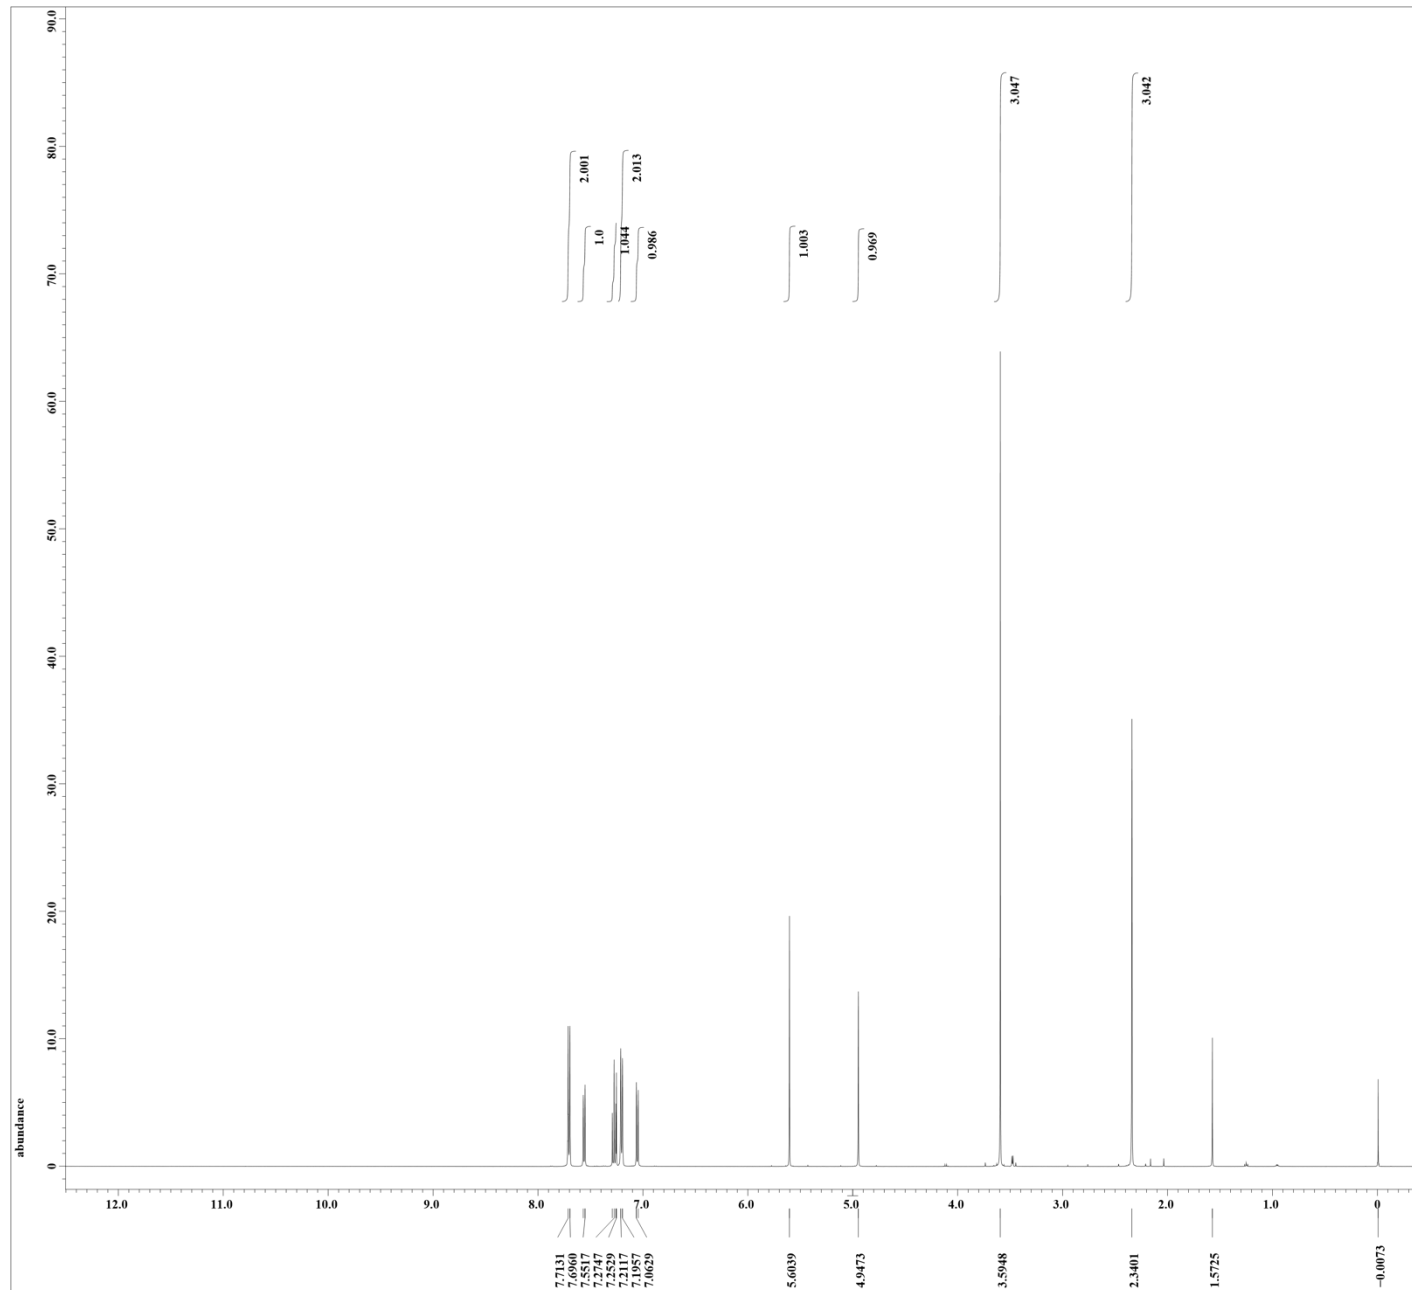

X : parts per Million : 1H



```

Filename      = YT-20-01-18-4-3.jdf
Author       = delta
Experiment   = single_pulse_dec
Sample_id    = 4C1
Solvent      = CHLOROFORM-D
Creation_time = 18-JAN-2020 17:53:58
Revision_time = 30-JAN-2020 03:35:19
Current_time  = 30-JAN-2020 03:35:31

Content      = single_pulse_decouple
Data format  = 1D COMPLEX
Dim_size     = 26214
Dim_title    = 13C
Dim_units    = [ppm]
Dimensions   = X
Site         = ECA 500
Spectrometer = DELTA2_NMR

Field_strength = 11.62926421[T] (500[M]
X_acq_duration = 0.8388608[s]
X_domain       = 13C
X_freq         = 124.5010059[MHz]
X_offset       = 100[ppm]
X_points       = 32768
X_prescans     = 4
X_resolution   = 1.1920929[Hz]
X_sweep        = 39.0625[kHz]
Irr_domain     = 1H
Irr_freq       = 495.13191398[MHz]
Irr_offset     = 5[ppm]
Clipped        = FALSE
Mod_return     = 1
Scans          = 1418
Total_scans    = 1418

X_90_width    = 10.1[us]
X_acq_time    = 0.8388608[s]
X_angle       = 30[deg]
X_atn         = 9.5[dB]
X_pulse       = 3.36666667[us]
Irr_atn_dec   = 21.51[dB]
Irr_atn_noe   = 21.51[dB]
Irr_noise     = WALZ
Decoupling    = TRUE
Initial_wait  = 1[s]
Noe           = TRUE
Noe_time      = 2[s]
Recvr_gain    = 60
Relaxation_delay = 2[s]
Repetition_time = 2.8388608[s]
Temp_get      = 24[dc]
  
```

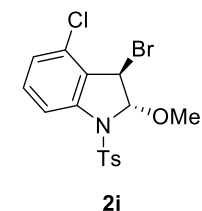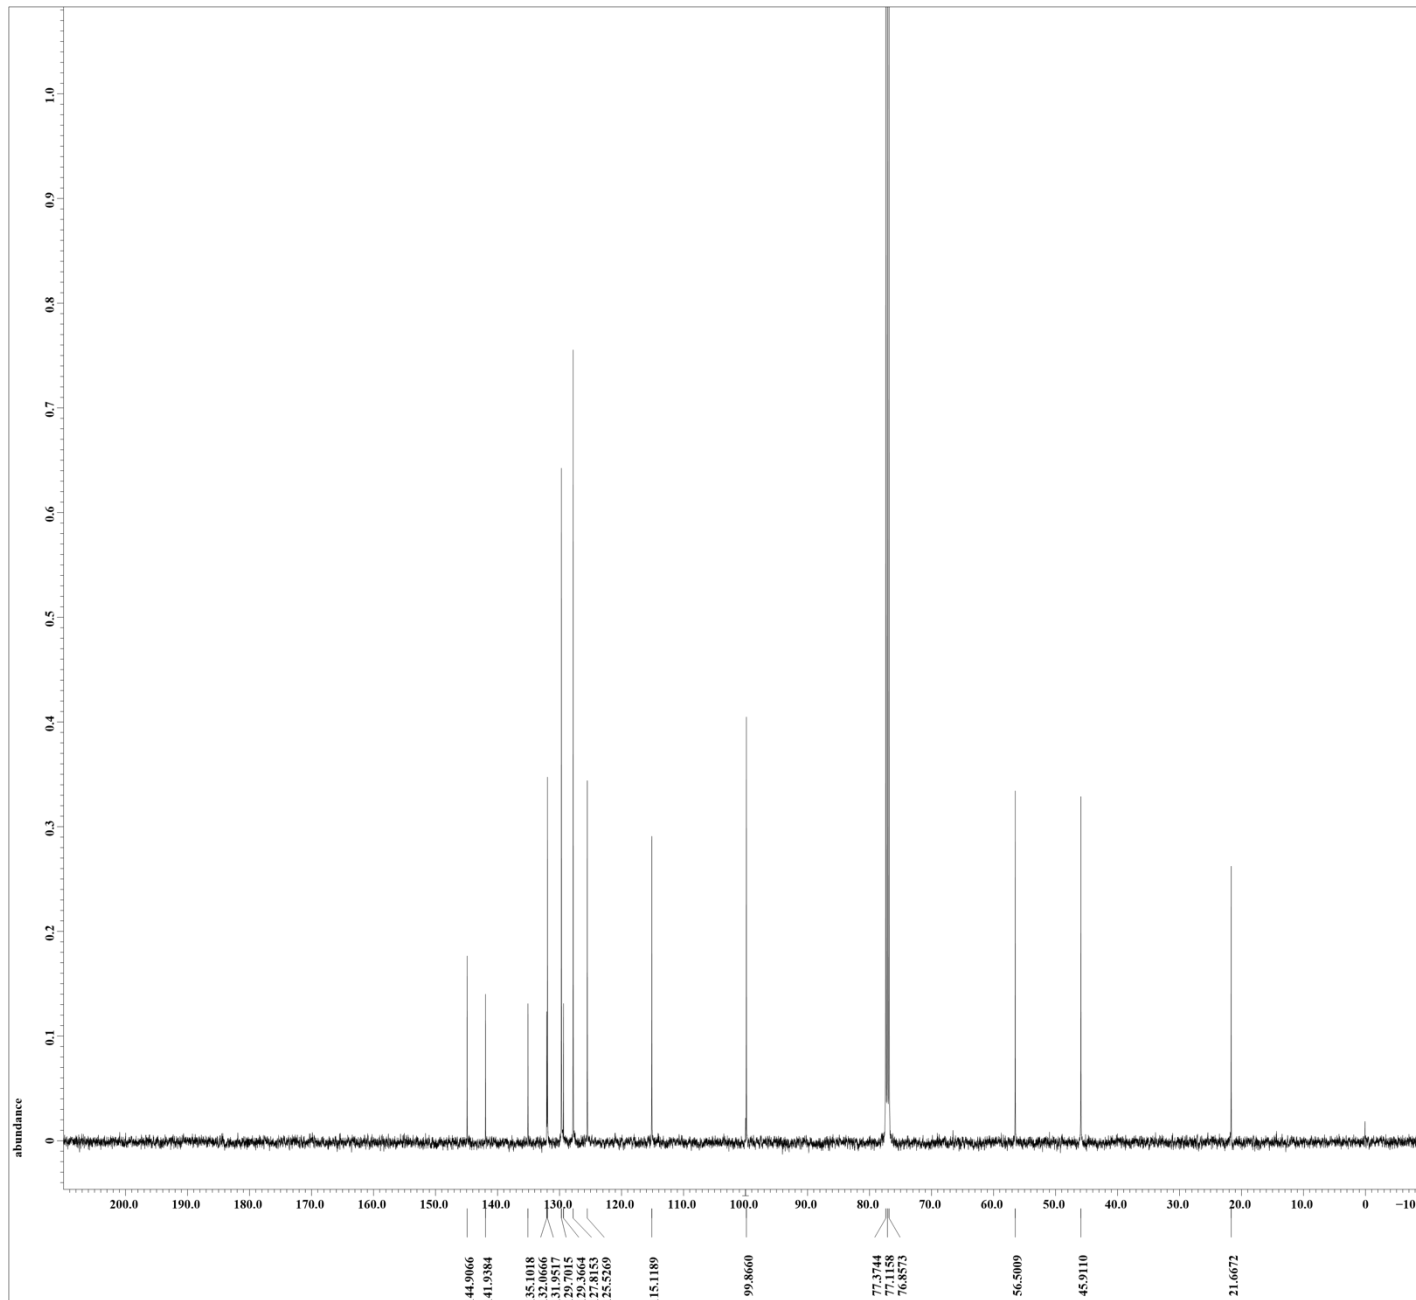

X : parts per Million : 13C



Filename = YT-20-01-21-10-6.jdf  
 Author = delta  
 Experiment = single\_pulse.ex2  
 Sample\_id = 6 1cr  
 Solvent = CHLOROFORM-D  
 Creation\_time = 7-APR-2020 18:59:15  
 Revision\_time = 30-JAN-2020 03:46:13  
 Current\_time = 30-JAN-2020 03:46:21

Content = single\_pulse  
 Data\_format = 1D COMPLEX  
 Dim\_size = 13107  
 Dim\_title = 1H  
 Dim\_units = [ppm]  
 Dimensions = X  
 Site = ECA500  
 Spectrometer = DELTA2\_NMR

Field\_strength = 11.7473579[T] (500[MH]  
 X\_acq\_duration = 1.74587904[s]  
 X\_domain = 1H  
 X\_freq = 500.15991521[MHz]  
 X\_offset = 5.0[ppm]  
 X\_points = 16384  
 X\_prescans = 1  
 X\_resolution = 0.57277737[Hz]  
 X\_sweep = 9.38438438[kHz]  
 Irr\_domain = 1H  
 Irr\_freq = 500.15991521[MHz]  
 Irr\_offset = 5.0[ppm]  
 Tri\_domain = 1H  
 Tri\_freq = 500.15991521[MHz]  
 Tri\_offset = 5.0[ppm]  
 Clipped = FALSE  
 Mod\_return = 1  
 Scans = 8  
 Total\_scans = 8

X\_90\_width = 12[us]  
 X\_acq\_time = 1.74587904[s]  
 X\_angle = 45[deg]  
 X\_atn = 3.4[db]  
 X\_pulse = 6[us]  
 Irr\_mode = Off  
 Tri\_mode = Off  
 Dante\_presat = FALSE  
 Initial\_wait = 1[s]  
 Recv\_gain = 50  
 Relaxation\_delay = 5[s]  
 Repetition\_time = 6.74587904[s]  
 Temp\_get = 22.8[dc]

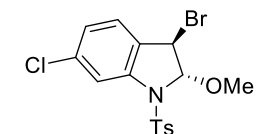

2j

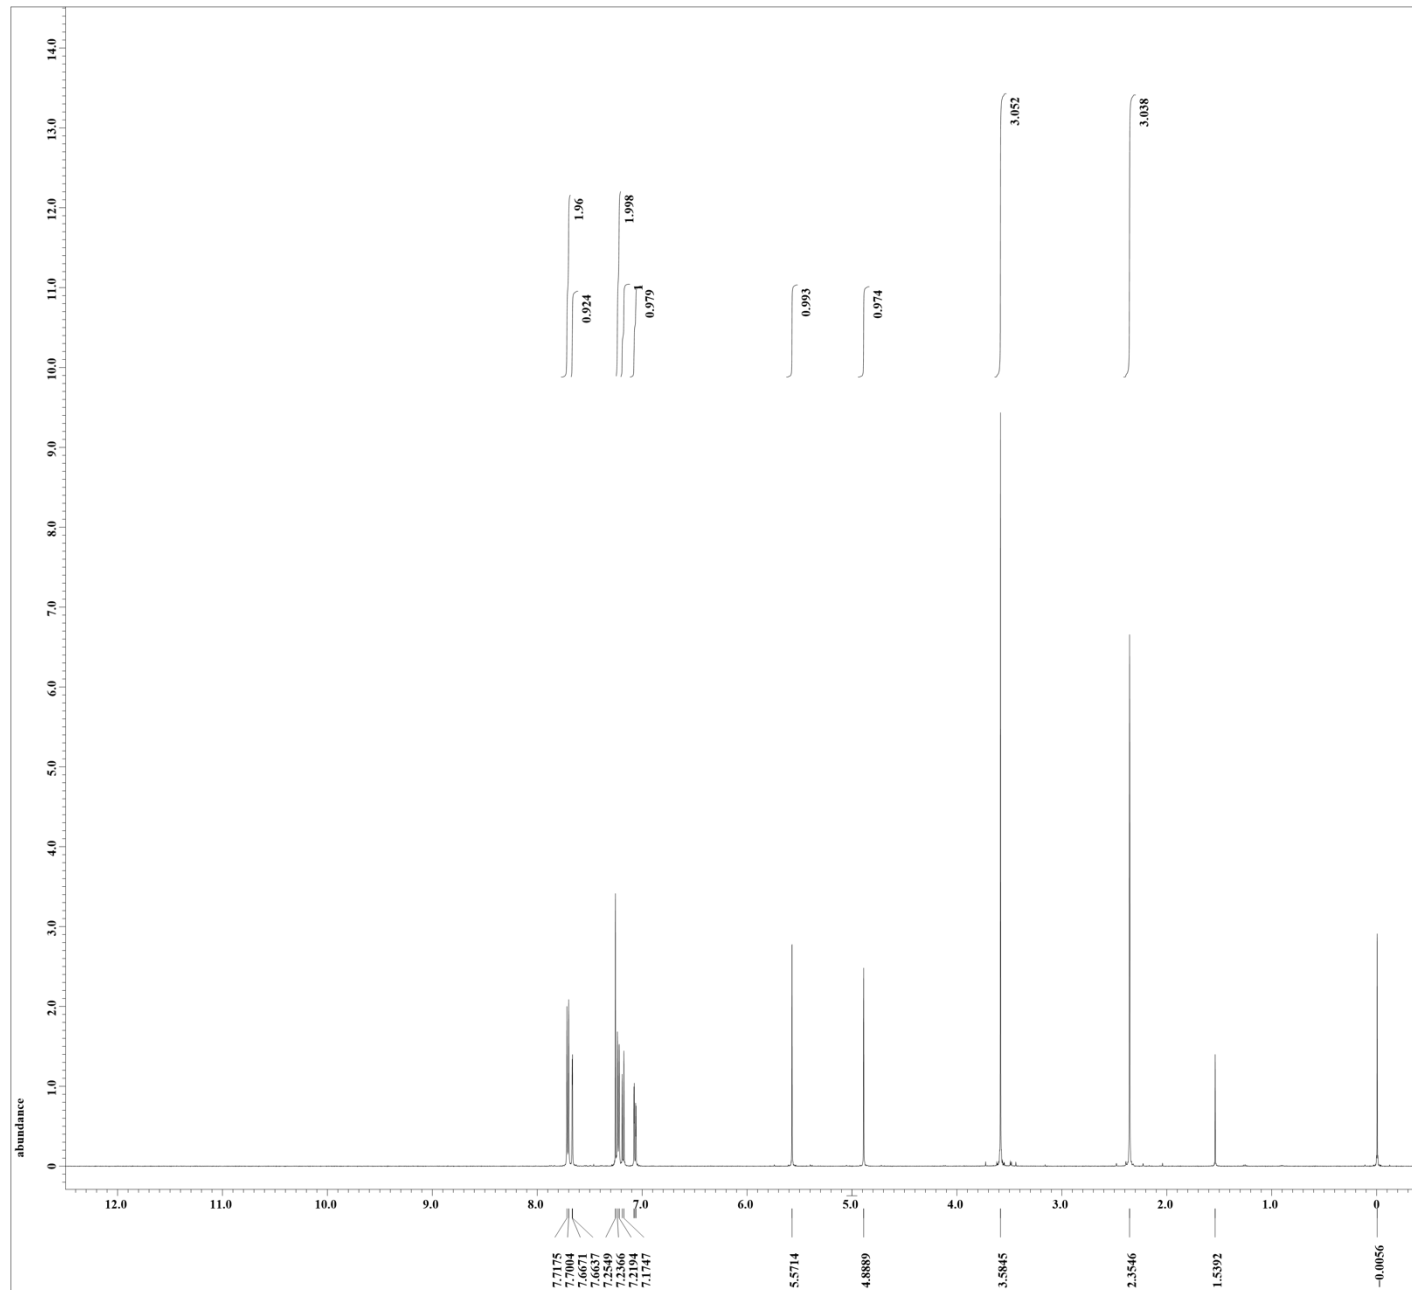

X : parts per Million : 1H



Filename = VT-20-01-21-10-4.jdf  
 Author = delta  
 Experiment = single\_pulse\_dec  
 Sample\_id = 6 1cr  
 Solvent = CHLOROFORM-D  
 Creation\_time = 8-APR-2000 10:31:13  
 Revision\_time = 30-JAN-2020 03:44:51  
 Current\_time = 30-JAN-2020 03:45:12

Content = single pulse decouple  
 Data format = 1D COMPLEX  
 Dim\_size = 26214  
 Dim\_title = 13C  
 Dim\_units = [ppm]  
 Dimensions = X  
 Site = ECA500  
 Spectrometer = DELTA2\_NMR

Field\_strength = 11.7473579[T] (500[MH  
 X\_acq\_duration = 0.83361792[s]  
 X\_domain = 13C  
 X\_freq = 125.76529768[MHz]  
 X\_offset = 100[ppm]  
 X\_points = 32768  
 X\_prescans = 4  
 X\_resolution = 1.19959034[Hz]  
 X\_sweep = 39.3081761[kHz]  
 Irr\_domain = 1H  
 Irr\_freq = 500.15991521[MHz]  
 Irr\_offset = 5.0[ppm]  
 Clipped = TRUE  
 Mod\_return = 1  
 Scans = 19723  
 Total\_scans = 19723

X\_90\_width = 12.8[us]  
 X\_acq\_time = 0.83361792[s]  
 X\_angle = 30[deg]  
 X\_atn = 5.3[dB]  
 X\_pulse = 4.26666667[us]  
 Irr\_atn\_dec = 21.09[dB]  
 Irr\_atn\_noe = 21.09[dB]  
 Irr\_noise = WALTZ  
 Decoupling = TRUE  
 Initial\_wait = 1[s]  
 Noe = TRUE  
 Noe\_time = 2[s]  
 Recv\_gain = 60  
 Relaxation\_delay = 2[s]  
 Repetition\_time = 2.83361792[s]  
 Temp\_get = 25[dc]

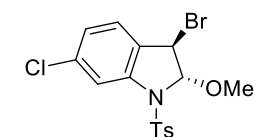

2j

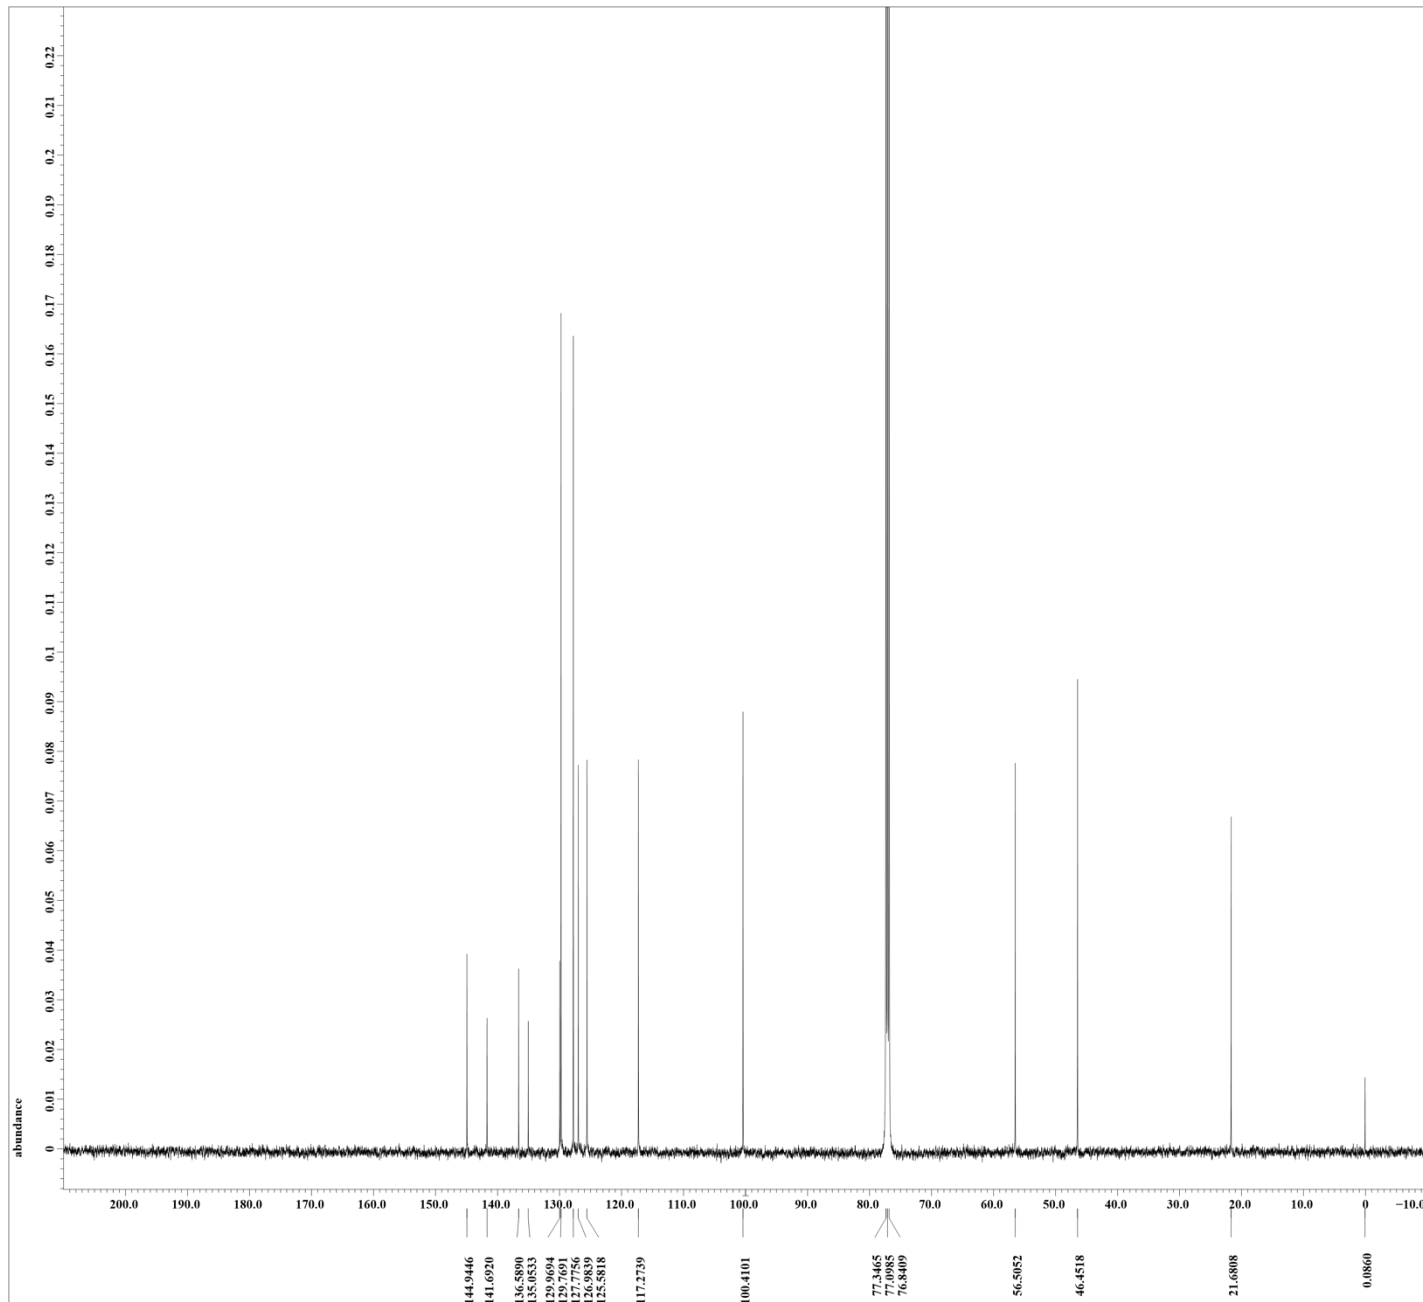

X : parts per Million : 13C

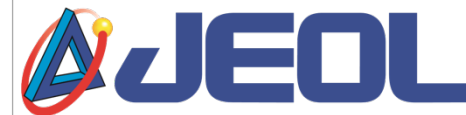

----- PROCESSING PARAMETERS -----  
 dc balance : 0 : FALSE  
 seXP : 0.2[Hz] : 0.0[s]  
 trapezoid3 : 0[%] : 80[%] : 100[%]  
 zerofill : 1  
 fft : 1 : TRUE : TRUE  
 machinephase  
 ppm  
 Derived from: TA2019-1224-1.jdf

Filename = TA2019-1224-12.jdf  
 Author = delta  
 Experiment = single\_pulse.ex2  
 Sample\_id = S8599878  
 Solvent = CHLOROFORM-D  
 Creation time = 10-MAR-2000 18:29:32  
 Revision time = 2-FEB-2020 11:51:44  
 Current time = 2-FEB-2020 11:52:09  
 Comment = single\_pulse  
 Data format = 1D COMPLEX  
 Dim Title = 13107  
 Dim Title = 1H  
 Dim units = [ppm]  
 Dimensions = X  
 Site = ECA500  
 Spectrometer = DELTA2\_NMR  
 Field strength = 11.7473579[T] (500[MH  
 X\_acq\_duration = 1.74587904[s]  
 X\_domain = 1H  
 X\_freq = 500.15991521[MHz]  
 X\_offset = 5.0[ppm]  
 X\_points = 16384  
 X\_prescans = 1  
 X\_resolution = 0.57277737[Hz]  
 X\_sweep = 9.38438438[kHz]  
 Irr\_domain = 1H  
 Irr\_freq = 500.15991521[MHz]  
 Irr\_offset = 5.0[ppm]  
 Tri\_domain = 1H  
 Tri\_freq = 500.15991521[MHz]  
 Tri\_offset = 5.0[ppm]  
 Clipped = TRUE  
 Mod return = 1  
 Scans = 8  
 Total\_scans = 8  
 X\_90\_width = 12[us]  
 X\_acq\_time = 1.74587904[s]  
 X\_angle = 45[deg]  
 X\_atn = 3.4[dB]  
 X\_pulse = 6[us]  
 Irr\_mode = Off  
 Tri\_mode = Off  
 Dante\_presat = FALSE  
 Initial\_wait = 1[s]  
 Recvr\_gain = 50  
 Relaxation\_delay = 5[s]  
 Repetition\_time = 6.74587904[s]  
 Temp\_get = 22.2[dc]

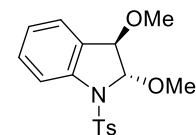

3a

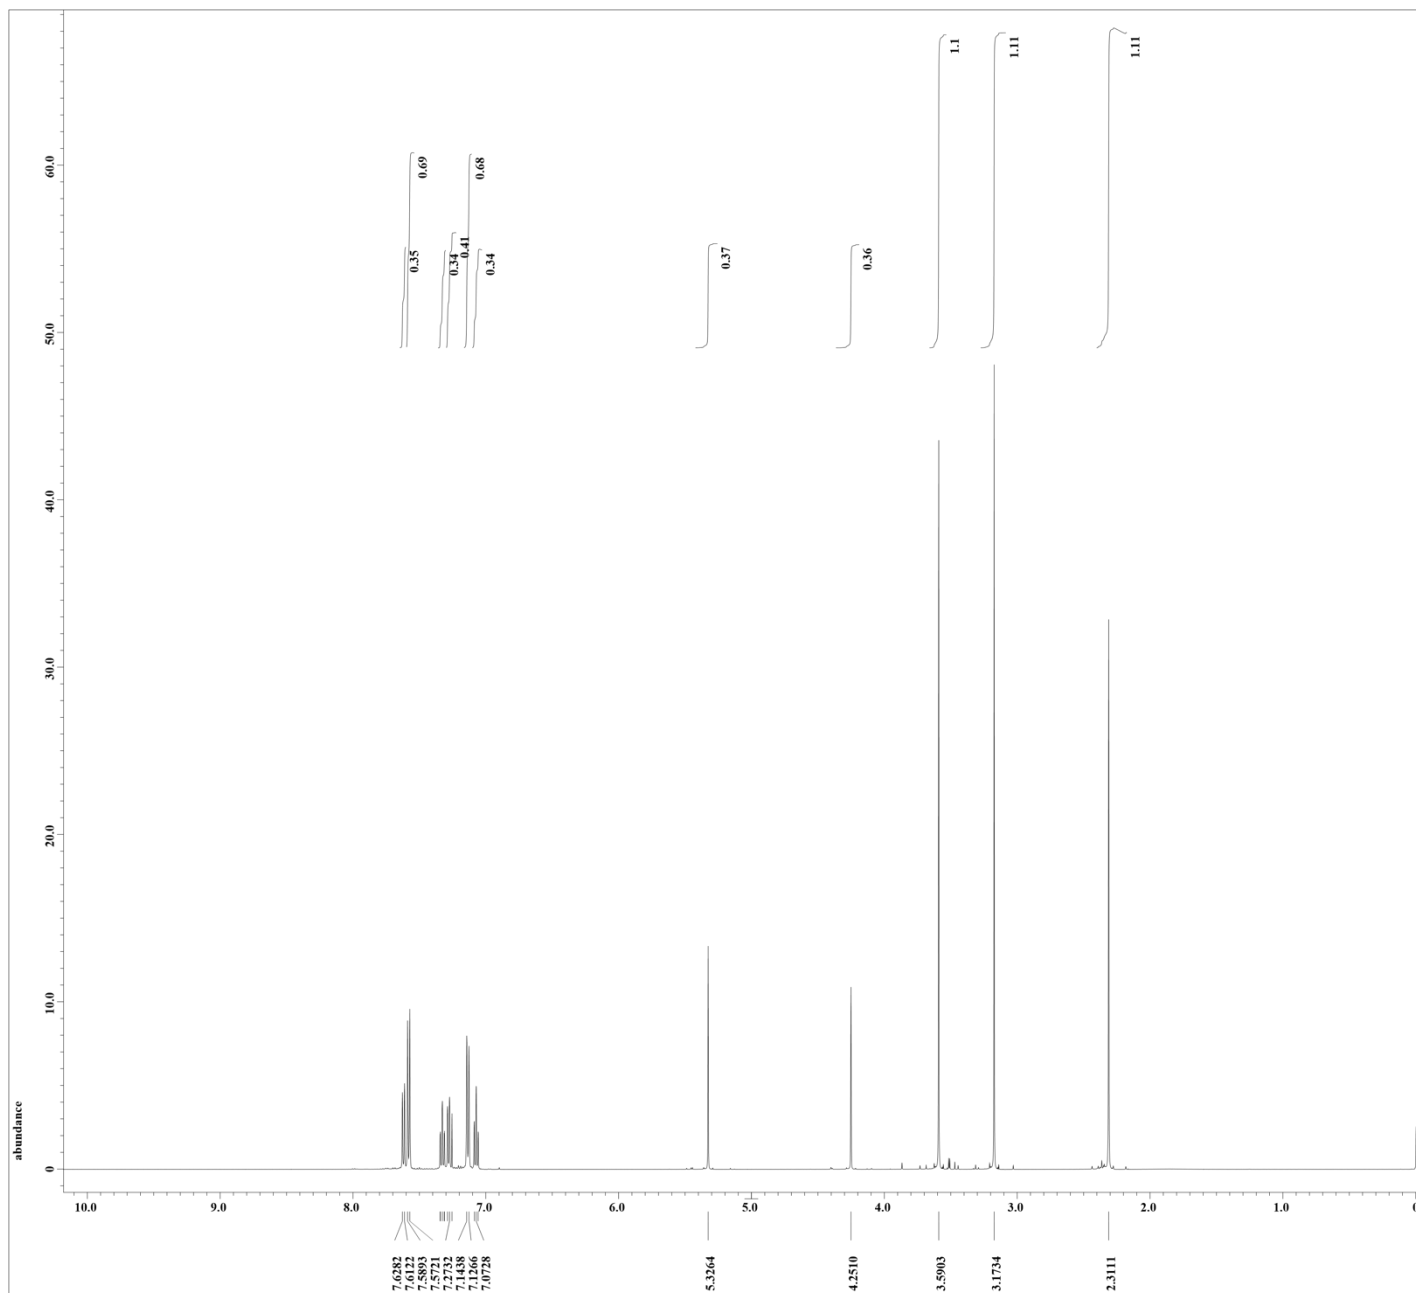



----- PROCESSING PARAMETERS -----  
 dc balance : 0 : FALSE  
 seXp : 2.0[Hz] : 0.0[s]  
 trapezoid3 : 0[%] : 80[%] : 100[%]  
 zeroFill : 1  
 fft : 1 : TRUE : TRUE  
 machinephase  
 ppm  
 Derived from: TA2019-1224-5.jdf

Filename = TA2019-1224-10.jdf  
 Author = delta  
 Experiment = single pulse dec  
 Sample\_id = S8600565  
 Solvent = CHLOROFORM-D  
 Creation time = 11-MAR-2000 08:55:17  
 Revision time = 2-FEB-2020 11:52:48  
 Current time = 2-FEB-2020 11:53:16  
 Comment = single pulse decouple  
 Data format = 1D COMPLEX  
 Dim Title = 26214  
 Dim Title = 13C  
 Dim units = [ppm]  
 Dimensions = X  
 Site = ECA500  
 Spectrometer = DELTA2 NMR  
 Field strength = 11.7473579[T] (500[MH  
 X\_acq\_duration = 0.83361792[s]  
 X\_domain = 13C  
 X\_freq = 125.76529768[MHz]  
 X\_offset = 100[ppm]  
 X\_points = 32768  
 X\_prescans = 4  
 X\_resolution = 1.19959034[Hz]  
 X\_sweep = 39.3081761[kHz]  
 Irr\_domain = 1H  
 Irr\_freq = 500.15991521[MHz]  
 Irr\_offset = 5.0[ppm]  
 Clipped = FALSE  
 Mod\_return = 1  
 Scans = 18315  
 Total\_scans = 18315  
 X\_90\_width = 12.8[us]  
 X\_acq\_time = 0.83361792[s]  
 X\_angle = 30[deg]  
 X\_atn = 5.3[dB]  
 X\_pulse = 4.26666667[us]  
 Irr\_atn\_dec = 21.09[dB]  
 Irr\_atn\_noe = 21.09[dB]  
 Irr\_noise = WALZ  
 Decoupling = TRUE  
 Initial\_wait = 1[s]  
 Noe = TRUE  
 Noe\_time = 2[s]  
 Recv\_gain = 56  
 Relaxation\_delay = 2[s]  
 Repetition\_time = 2.83361792[s]  
 Temp\_get = 24.3[dc]

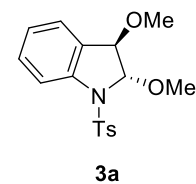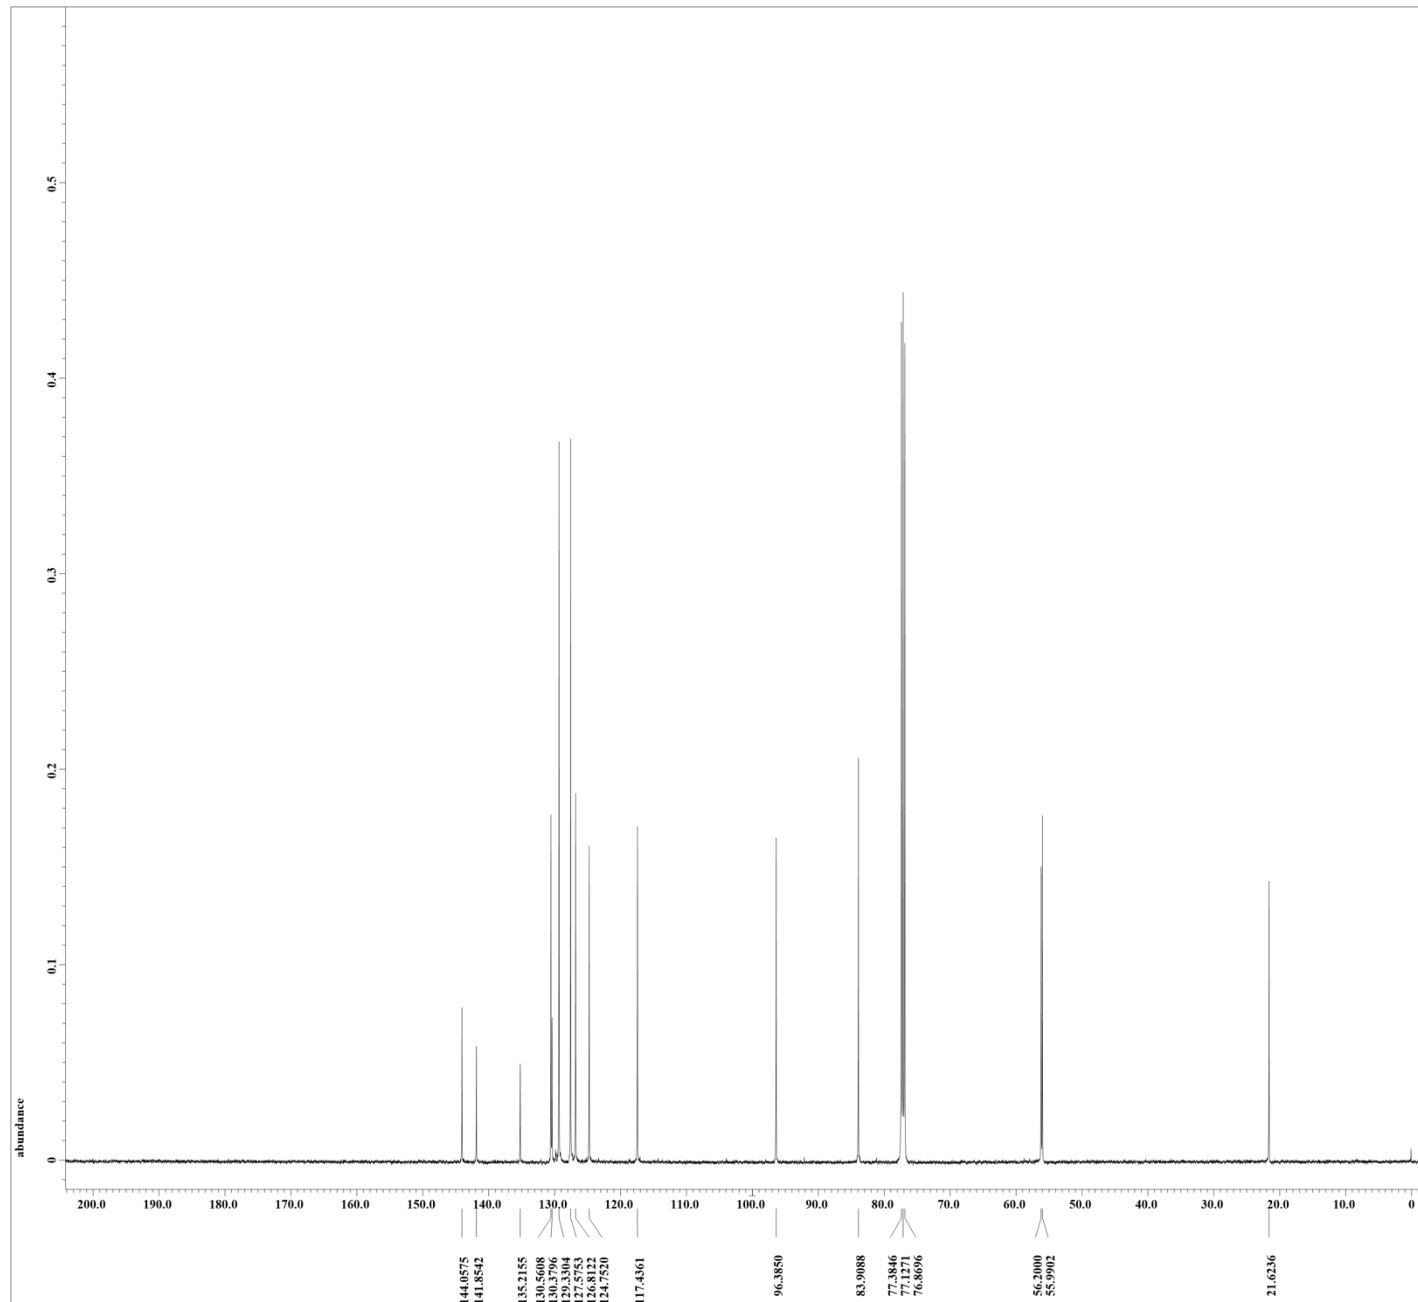

X : parts per Million : 13C



Filename = YT-20-01-31-4-12.jdf  
 Author = delta  
 Experiment = single\_pulse.ex2  
 Sample\_id = Bz  
 Solvent = CHLOROFORM-D  
 Creation\_time = 17-APR-2000 20:27:37  
 Revision\_time = 2-FEB-2020 15:21:10  
 Current\_Time = 2-FEB-2020 15:21:28

Content = single\_pulse  
 Data format = 1D COMPLEX  
 Dim\_size = 13107  
 Dim\_title = 1H  
 Dim\_units = [ppm]  
 Dimensions = X  
 Site = ECA500  
 Spectrometer = DELTA2\_NMR

Field\_strength = 11.7473579[T] (500[MH  
 X\_acq\_duration = 1.74587904[s]  
 X\_domain = 1H  
 X\_freq = 500.15991521[MHz]  
 X\_offset = 5.0[ppm]  
 X\_points = 16384  
 X\_prescans = 1  
 X\_resolution = 0.57277737[Hz]  
 X\_sweep = 9.38438438[kHz]  
 Irr\_domain = 1H  
 Irr\_freq = 500.15991521[MHz]  
 Irr\_offset = 5.0[ppm]  
 Tri\_domain = 1H  
 Tri\_freq = 500.15991521[MHz]  
 Tri\_offset = 5.0[ppm]  
 Clipped = FALSE  
 Mod\_return = 1  
 Scans = 8  
 Total\_scans = 8

X\_90\_width = 12[us]  
 X\_acq\_time = 1.74587904[s]  
 X\_angle = 45[deg]  
 X\_atn = 3.4[db]  
 X\_pulse = 6[us]  
 Irr\_mode = Off  
 Tri\_mode = Off  
 Dante\_presat = FALSE  
 Initial\_wait = 1[s]  
 Recvz\_gain = 50  
 Relaxation\_delay = 5[s]  
 Repetition\_time = 6.74587904[s]  
 Temp\_get = 22.4[dc]

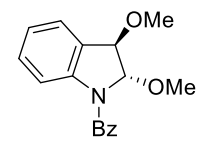

3b

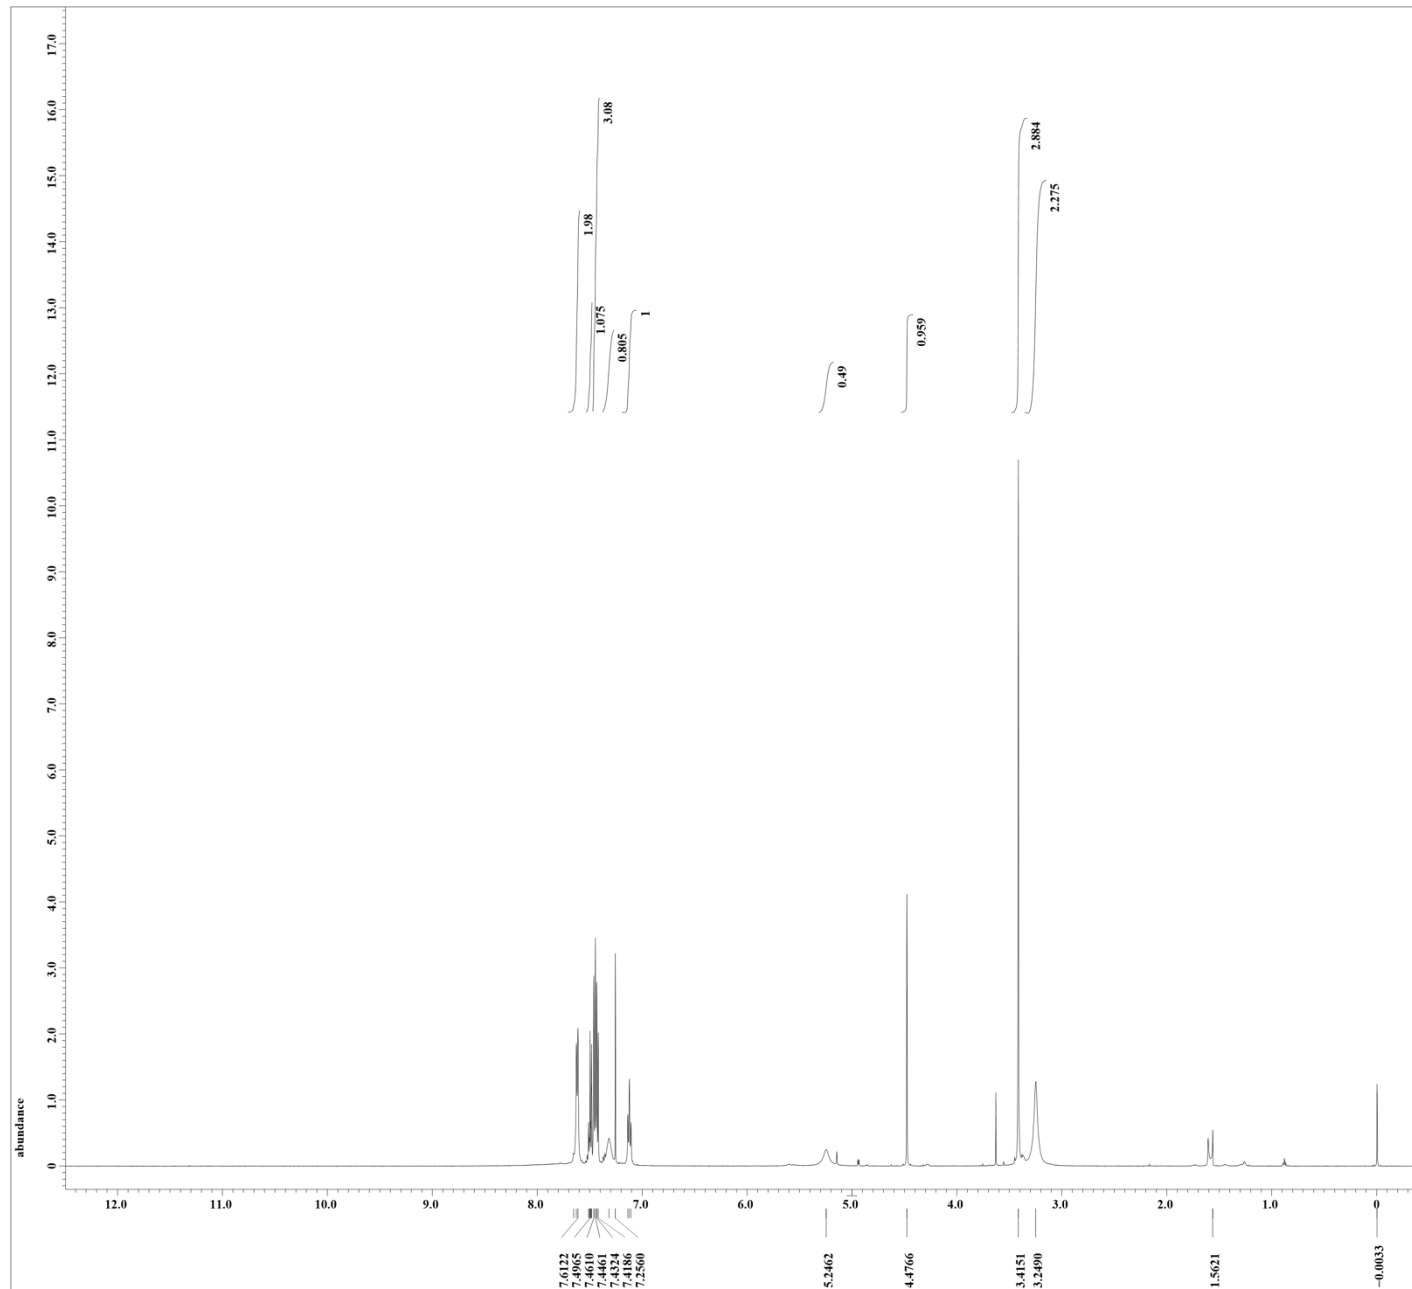

X : parts per Million : 1H



Filename = YT-20-01-31-4-12.jdf  
 Author = delta  
 Experiment = single\_pulse\_dec  
 Sample\_id = Bz  
 Solvent = CHLOROFORM-D  
 Creation\_time = 18-APR-2000 09:53:36  
 Revision\_time = 2-FEB-2020 15:09:21  
 Current\_time = 2-FEB-2020 15:09:54

Content = single pulse decouple  
 Data format = 1D COMPLEX  
 Dim\_size = 26214  
 Dim\_title = 13C  
 Dim\_units = [ppm]  
 Dimensions = X  
 Site = ECA500  
 Spectrometer = DELTA2\_NMR

Field\_strength = 11.7473579[T] (500[MH  
 X\_acq\_duration = 0.83361792[s]  
 X\_domain = 13C  
 X\_freq = 125.76529768[MHz]  
 X\_offset = 100[ppm]  
 X\_points = 32768  
 X\_prescans = 4  
 X\_resolution = 1.19959034[Hz]  
 X\_sweep = 39.3081761[kHz]  
 Irr\_domain = 1H  
 Irr\_freq = 500.15991521[MHz]  
 Irr\_offset = 5.0[ppm]  
 Clipped = TRUE  
 Mod\_return = 1  
 Scans = 14996  
 Total\_scans = 14996

X\_90\_width = 12.8[us]  
 X\_acq\_time = 0.83361792[s]  
 X\_angle = 30[deg]  
 X\_atn = 5.3[dB]  
 X\_pulse = 4.26666667[us]  
 Irr\_atn\_dec = 21.09[dB]  
 Irr\_atn\_noe = 21.09[dB]  
 Irr\_noise = WALTZ  
 Decoupling = TRUE  
 Initial\_wait = 1[s]  
 Noe = TRUE  
 Noe\_time = 2[s]  
 Recvr\_gain = 60  
 Relaxation\_delay = 2[s]  
 Repetition\_time = 2.83361792[s]  
 Temp\_get = 24.1[dc]

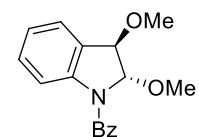

**3b**

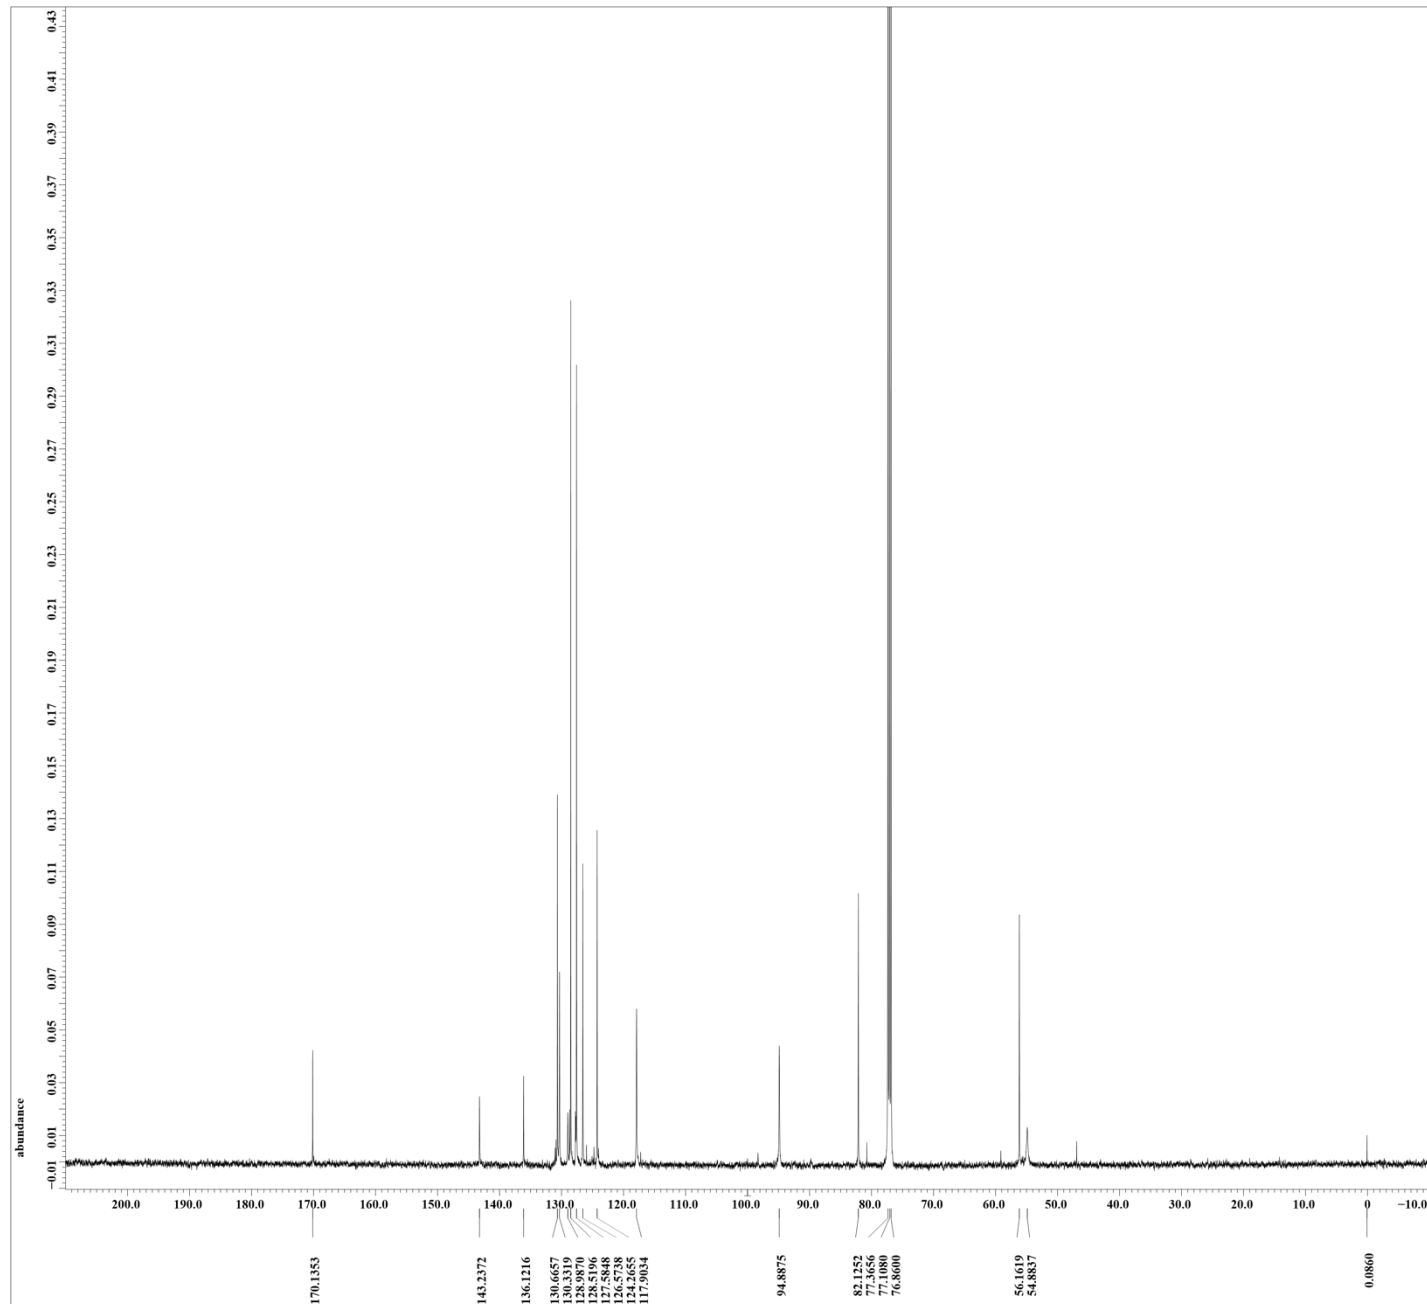





```

Filename      = YT-20-01-25-9-15.jdf
Author        = delta
Experiment    = single_pulse.ex2
Sample_id     = fr2
Solvent       = CHLOROFORM-D
Creation_time  = 25-JAN-2020 15:52:50
Revision_time  = 30-JAN-2020 03:54:11
Current_time   = 30-JAN-2020 03:54:30

Content       = single_pulse
Data format   = 1D COMPLEX
Dim_size      = 13107
Dim_title     = 1H
Dim_units     = [ppm]
Dimensions    = X
Site          = ECA 500
Spectrometer  = DELTA2_NMR

Field_strength = 11.62926421[T] (500[M]
X_acq_duration = 1.76422912[s]
X_domain       = 1H
X_freq         = 495.13191398[MHz]
X_offset       = 5[ppm]
X_points       = 16384
X_prescans     = 1
X_resolution   = 0.5668198[Hz]
X_sweep        = 9.28677563[kHz]
Irr_domain     = 1H
Irr_freq       = 495.13191398[MHz]
Irr_offset     = 5[ppm]
Tri_domain     = 1H
Tri_freq       = 495.13191398[MHz]
Tri_offset     = 5[ppm]
Clipped        = FALSE
Mod_return     = 1
Scans          = 8
Total_scans    = 8

X_90_width     = 11.3[us]
X_acq_time     = 1.76422912[s]
X_angle        = 45[deg]
X_atn          = 3.3[db]
X_pulse        = 5.65[us]
Irr_mode       = Off
Tri_mode       = Off
Dante_presat   = FALSE
Initial_wait   = 1[s]
Recvr_gain     = 34
Relaxation_delay = 5[s]
Repetition_time = 6.76422912[s]
Temp_get       = 23.2[dc]
  
```

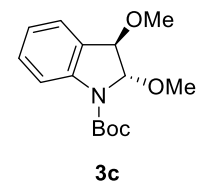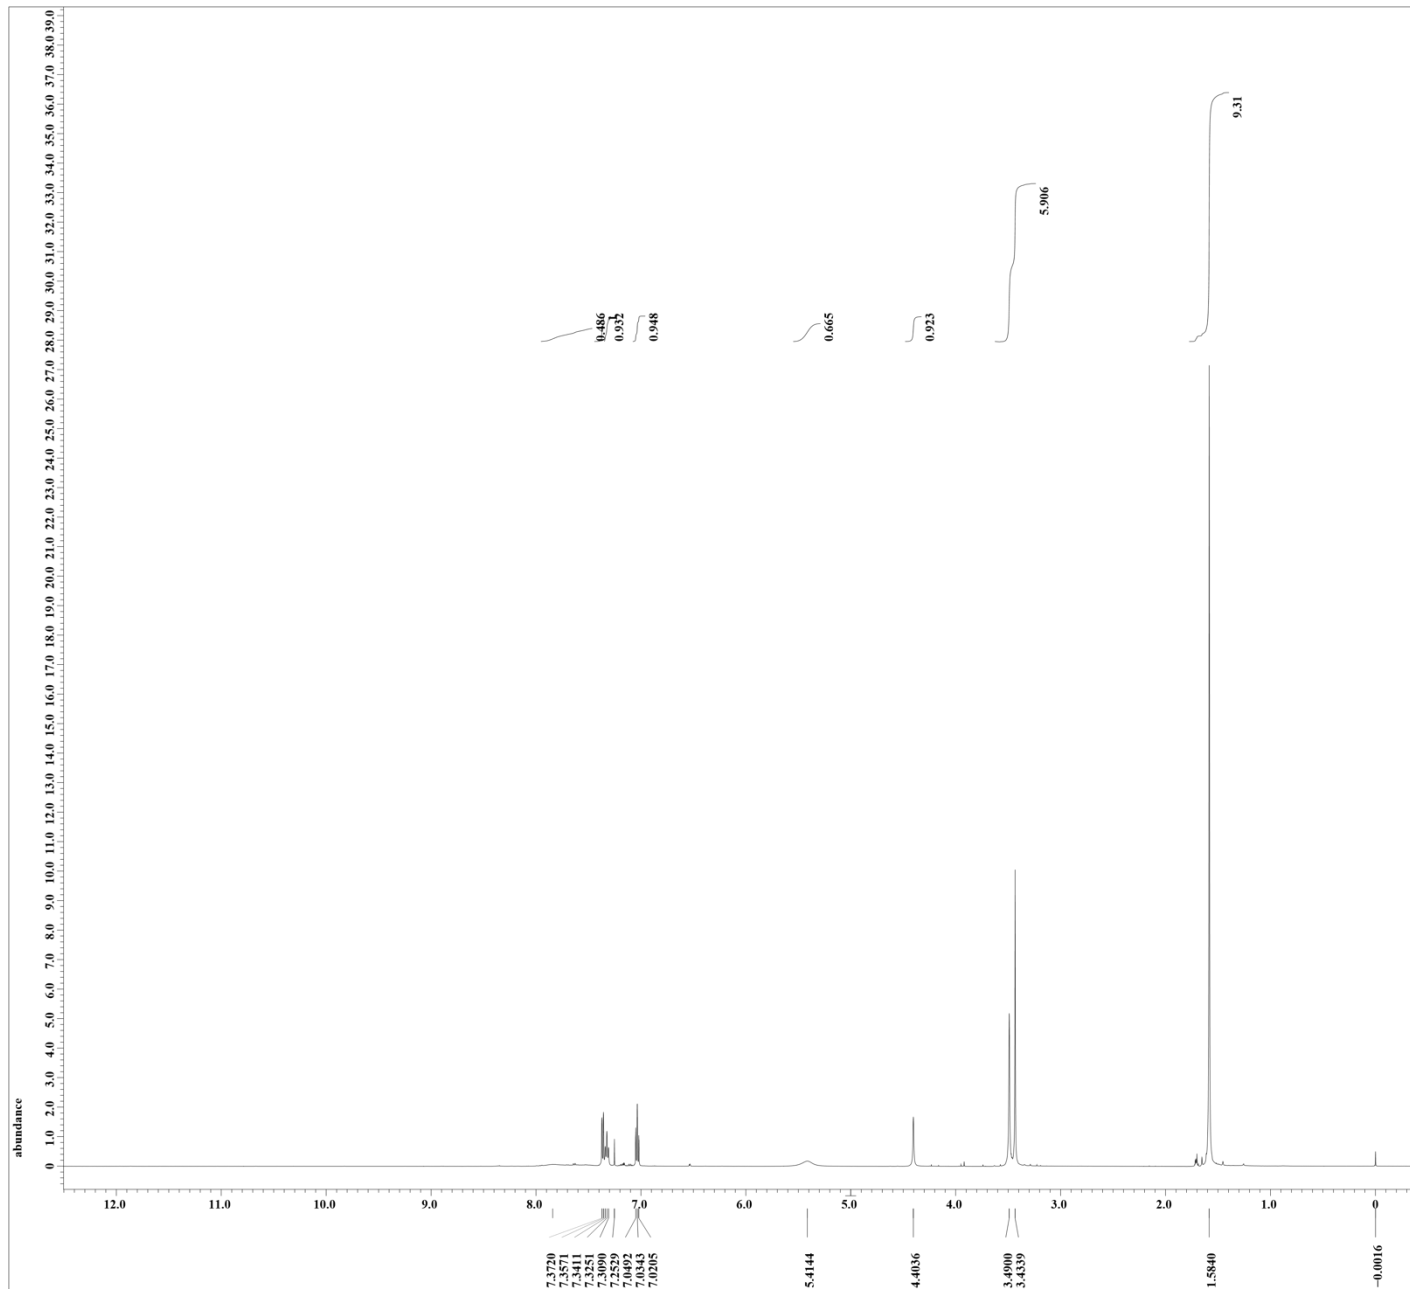

X : parts per Million : 1H



Filename = YT-20-01-25-9-17.jdf  
 Author = delta  
 Experiment = single\_pulse\_dec  
 Sample\_id = fr2  
 Solvent = CHLOROFORM-D  
 Creation\_time = 25-JAN-2020 17:05:17  
 Revision\_time = 25-JAN-2020 19:45:12  
 Current\_time = 25-JAN-2020 19:46:09

Content = single pulse decouple  
 Data format = 1D COMPLEX  
 Dim\_size = 26214  
 Dim\_title = 13C  
 Dim\_units = [ppm]  
 Dimensions = X  
 Site = ECA 500  
 Spectrometer = DELTA2\_NMR

Field\_strength = 11.62926421[T] (500[M]  
 X\_acq\_duration = 0.8388608[s]  
 X\_domain = 13C  
 X\_freq = 124.5010059[MHz]  
 X\_offset = 100[ppm]  
 X\_points = 32768  
 X\_prescans = 4  
 X\_resolution = 1.1920929[Hz]  
 X\_sweep = 39.0625[kHz]  
 Irr\_domain = 1H  
 Irr\_freq = 495.13191398[MHz]  
 Irr\_offset = 5[ppm]  
 Clipped = FALSE  
 Mod\_return = 1  
 Scans = 1504  
 Total\_scans = 1504

X\_90\_width = 10.1[us]  
 X\_acq\_time = 0.8388608[s]  
 X\_angle = 30[deg]  
 X\_atn = 9.5[dB]  
 X\_pulse = 3.36666667[us]  
 Irr\_atn\_dec = 21.51[dB]  
 Irr\_atn\_noe = 21.51[dB]  
 Irr\_noise = WALTZ  
 Decoupling = TRUE  
 Initial\_wait = 1[s]  
 Noe = TRUE  
 Noe\_time = 2[s]  
 Recv\_gain = 60  
 Relaxation\_delay = 2[s]  
 Repetition\_time = 2.8388608[s]  
 Temp\_get = 23.9[dc]

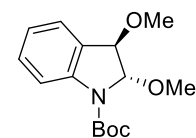

3c

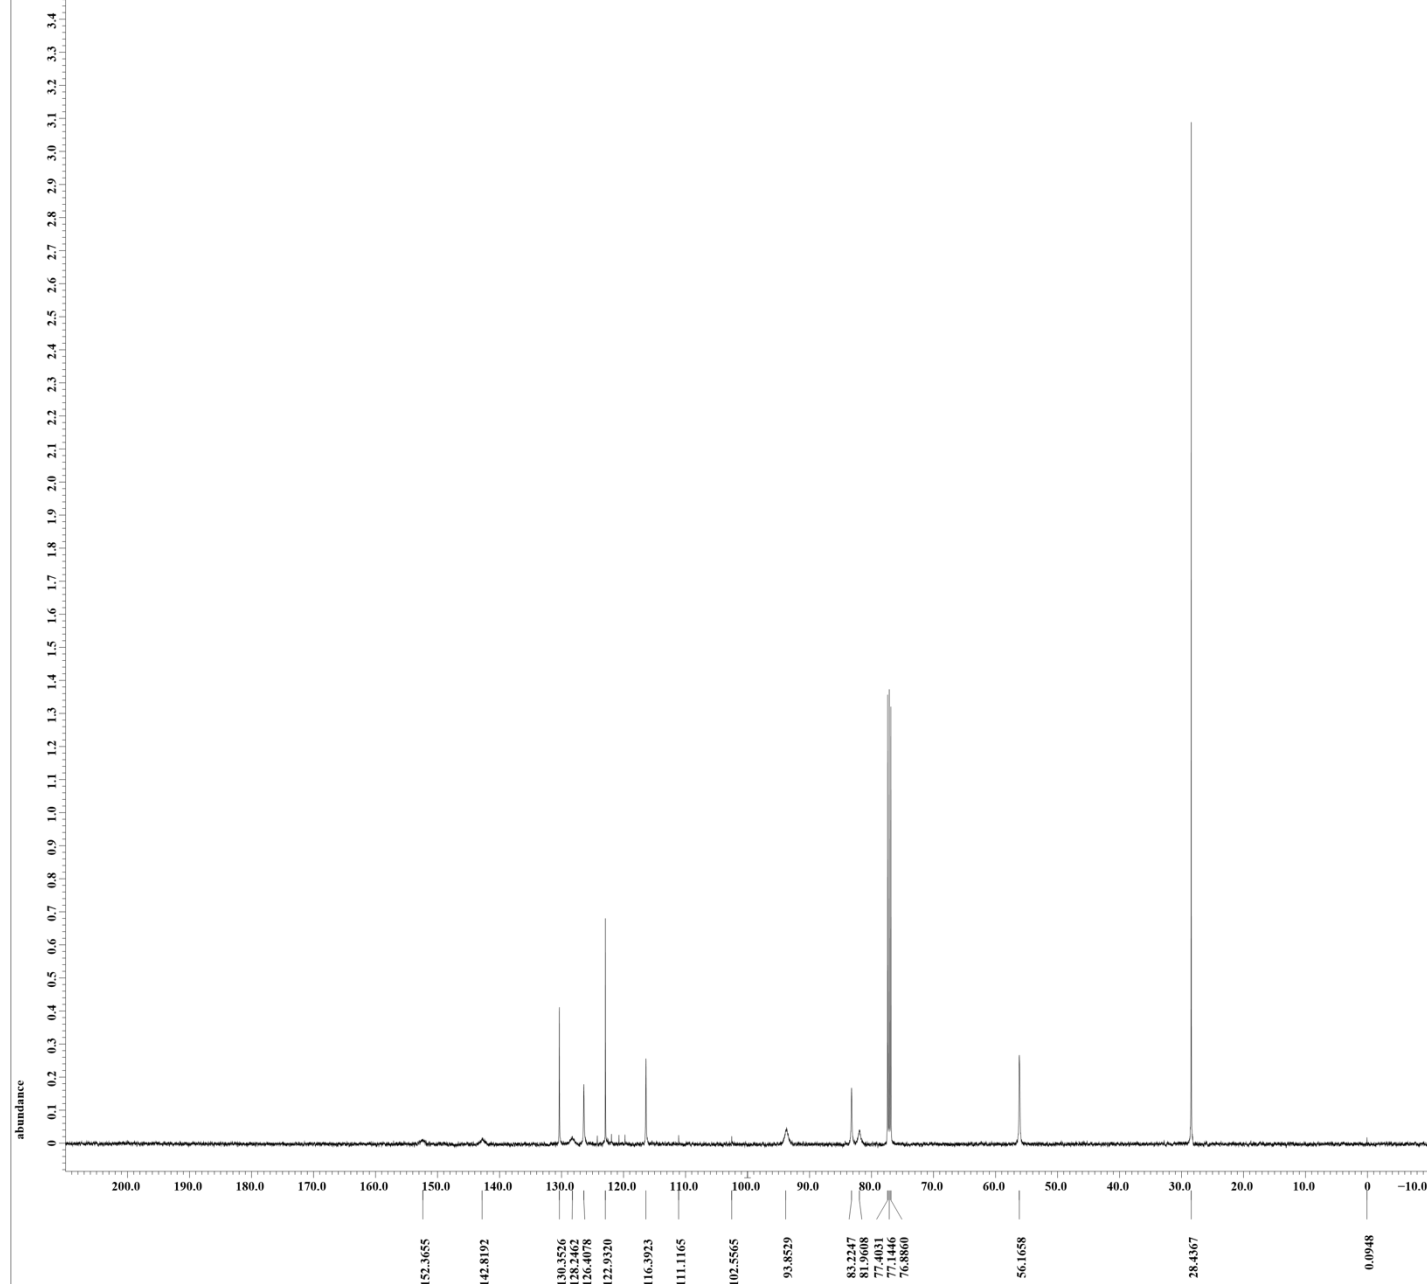

X : parts per Million : 13C



Filename = VT-20-01-27-3-6.jdf  
 Author = delta  
 Experiment = single\_pulse.ex2  
 Sample\_id = ac2  
 Solvent = CHLOROFORM-D  
 Creation\_time = 27-JAN-2020 15:28:14  
 Revision\_time = 30-JAN-2020 04:10:45  
 Current\_Time = 30-JAN-2020 04:10:56

Content = single\_pulse  
 Data format = 1D COMPLEX  
 Dim\_size = 13107  
 Dim\_title = 1H  
 Dim\_units = [ppm]  
 Dimensions = X  
 Site = ECA 500  
 Spectrometer = DELTA2\_NMR

Field\_strength = 11.62926421[T] (500[M]  
 X\_acq\_duration = 1.76422912[s]  
 X\_domain = 1H  
 X\_freq = 495.13191398[MHz]  
 X\_offset = 5[ppm]  
 X\_points = 16384  
 X\_prescans = 1  
 X\_resolution = 0.5668198[Hz]  
 X\_sweep = 9.28677563[kHz]  
 Irr\_domain = 1H  
 Irr\_freq = 495.13191398[MHz]  
 Irr\_offset = 5[ppm]  
 Tri\_domain = 1H  
 Tri\_freq = 495.13191398[MHz]  
 Tri\_offset = 5[ppm]  
 Clipped = FALSE  
 Mod\_return = 1  
 Scans = 8  
 Total\_scans = 8

X\_90\_width = 11.3[us]  
 X\_acq\_time = 1.76422912[s]  
 X\_angle = 45[deg]  
 X\_atn = 3.3[db]  
 X\_pulse = 5.65[us]  
 Irr\_mode = Off  
 Tri\_mode = Off  
 Dante\_presat = FALSE  
 Initial\_wait = 1[s]  
 Recvz\_gain = 36  
 Relaxation\_delay = 5[s]  
 Repetition\_time = 6.76422912[s]  
 Temp\_get = 23.4[dc]

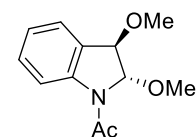

3d

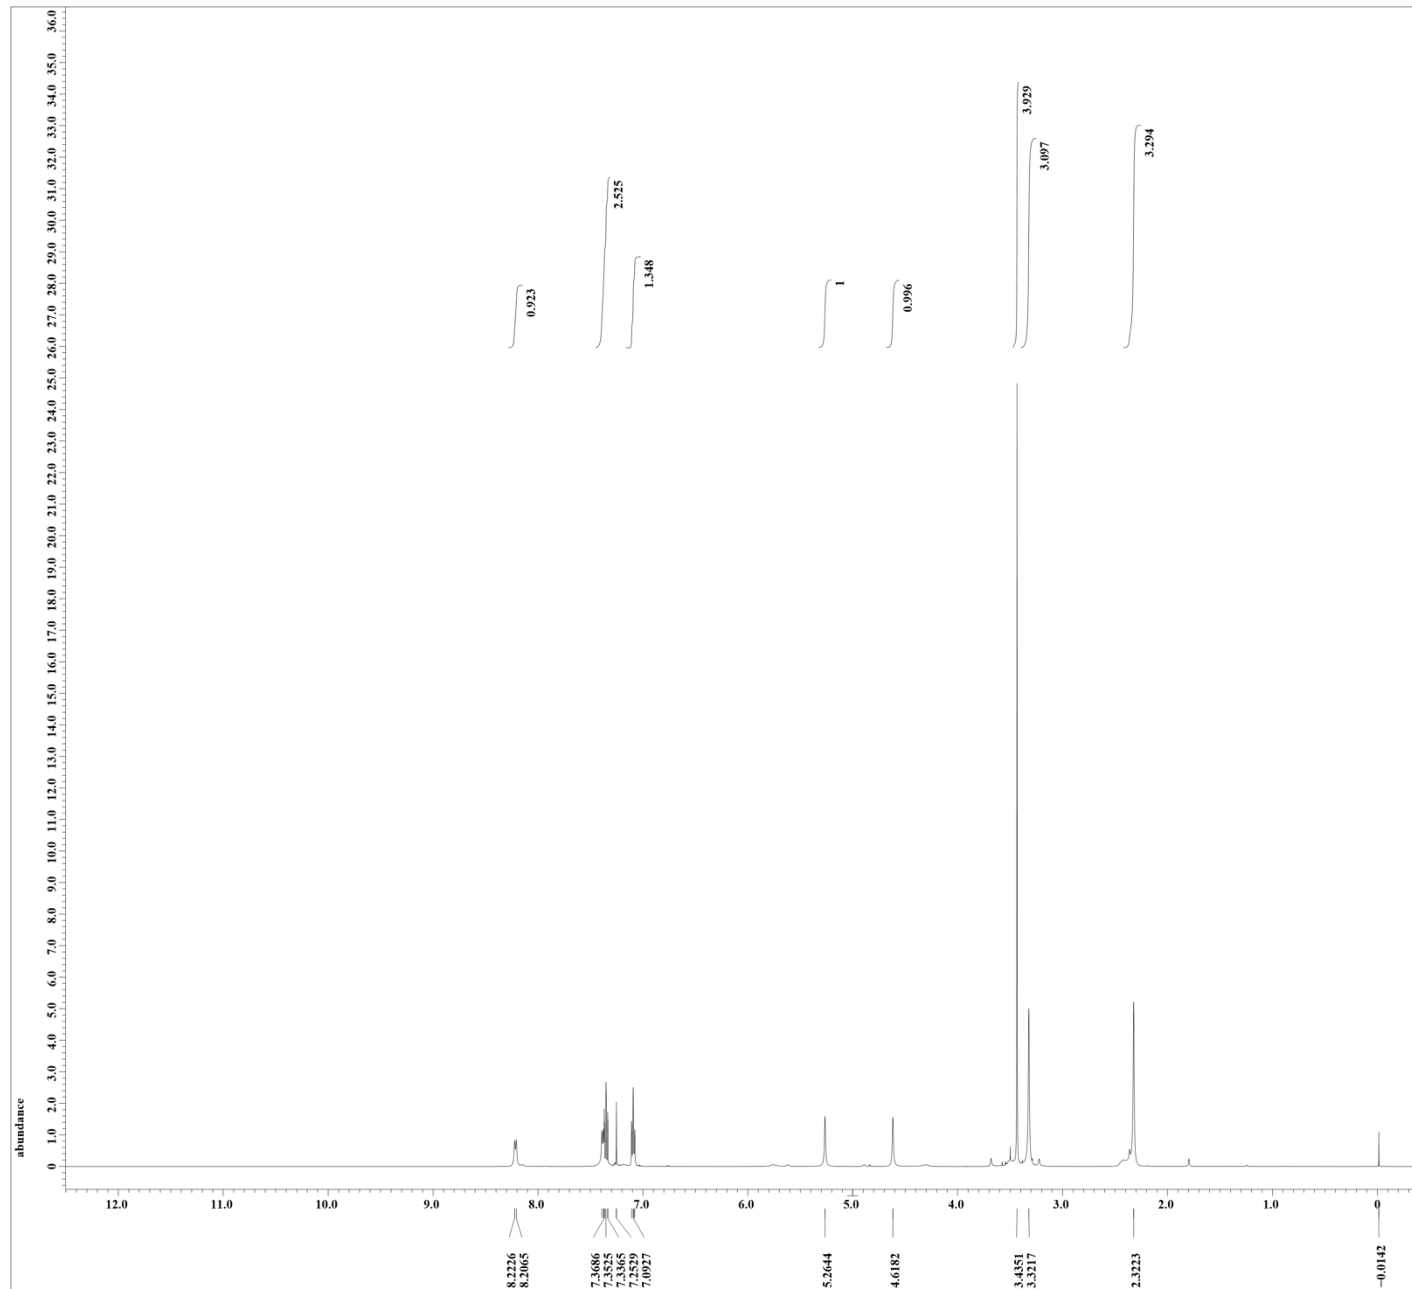

X : parts per Million : 1H



Filename = VT-20-01-21-8-6.jdf  
Author = delta  
Experiment = single\_pulse\_dec  
Sample\_id = nsdi  
Solvent = CHLOROFORM-D  
Creation\_time = 7-APR-2000 18:44:10  
Revision\_time = 30-JAN-2020 03:48:50  
Current\_time = 30-JAN-2020 03:49:11

Content = single pulse decouple  
Data format = 1D COMPLEX  
Dim\_size = 26214  
Dim\_title = 13C  
Dim\_units = [ppm]  
Dimensions = X  
Site = ECA500  
Spectrometer = DELTA2\_NMR

Field\_strength = 11.7473579[T] (500[MH  
X\_acq\_duration = 0.83361792[s]  
X\_domain = 13C  
X\_freq = 125.76529768[MHz]  
X\_offset = 100[ppm]  
X\_points = 32768  
X\_prescans = 4  
X\_resolution = 1.19959034[Hz]  
X\_sweep = 39.3081761[kHz]  
Irr\_domain = 1H  
Irr\_freq = 500.15991521[MHz]  
Irr\_offset = 5.0[ppm]  
Clipped = FALSE  
Mod\_return = 1  
Scans = 1637  
Total\_scans = 1637

X\_90\_width = 12.8[us]  
X\_acq\_time = 0.83361792[s]  
X\_angle = 30[deg]  
X\_atn = 5.3[dB]  
X\_pulse = 4.26666667[us]  
Irr\_atn\_dec = 21.09[dB]  
Irr\_atn\_noe = 21.09[dB]  
Irr\_noise = WALTZ  
Decoupling = TRUE  
Initial\_wait = 1[s]  
Noe = TRUE  
Noe\_time = 2[s]  
Recvr\_gain = 54  
Relaxation\_delay = 2[s]  
Repetition\_time = 2.83361792[s]  
Temp\_get = 23.5[dc]

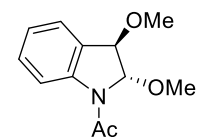

3d

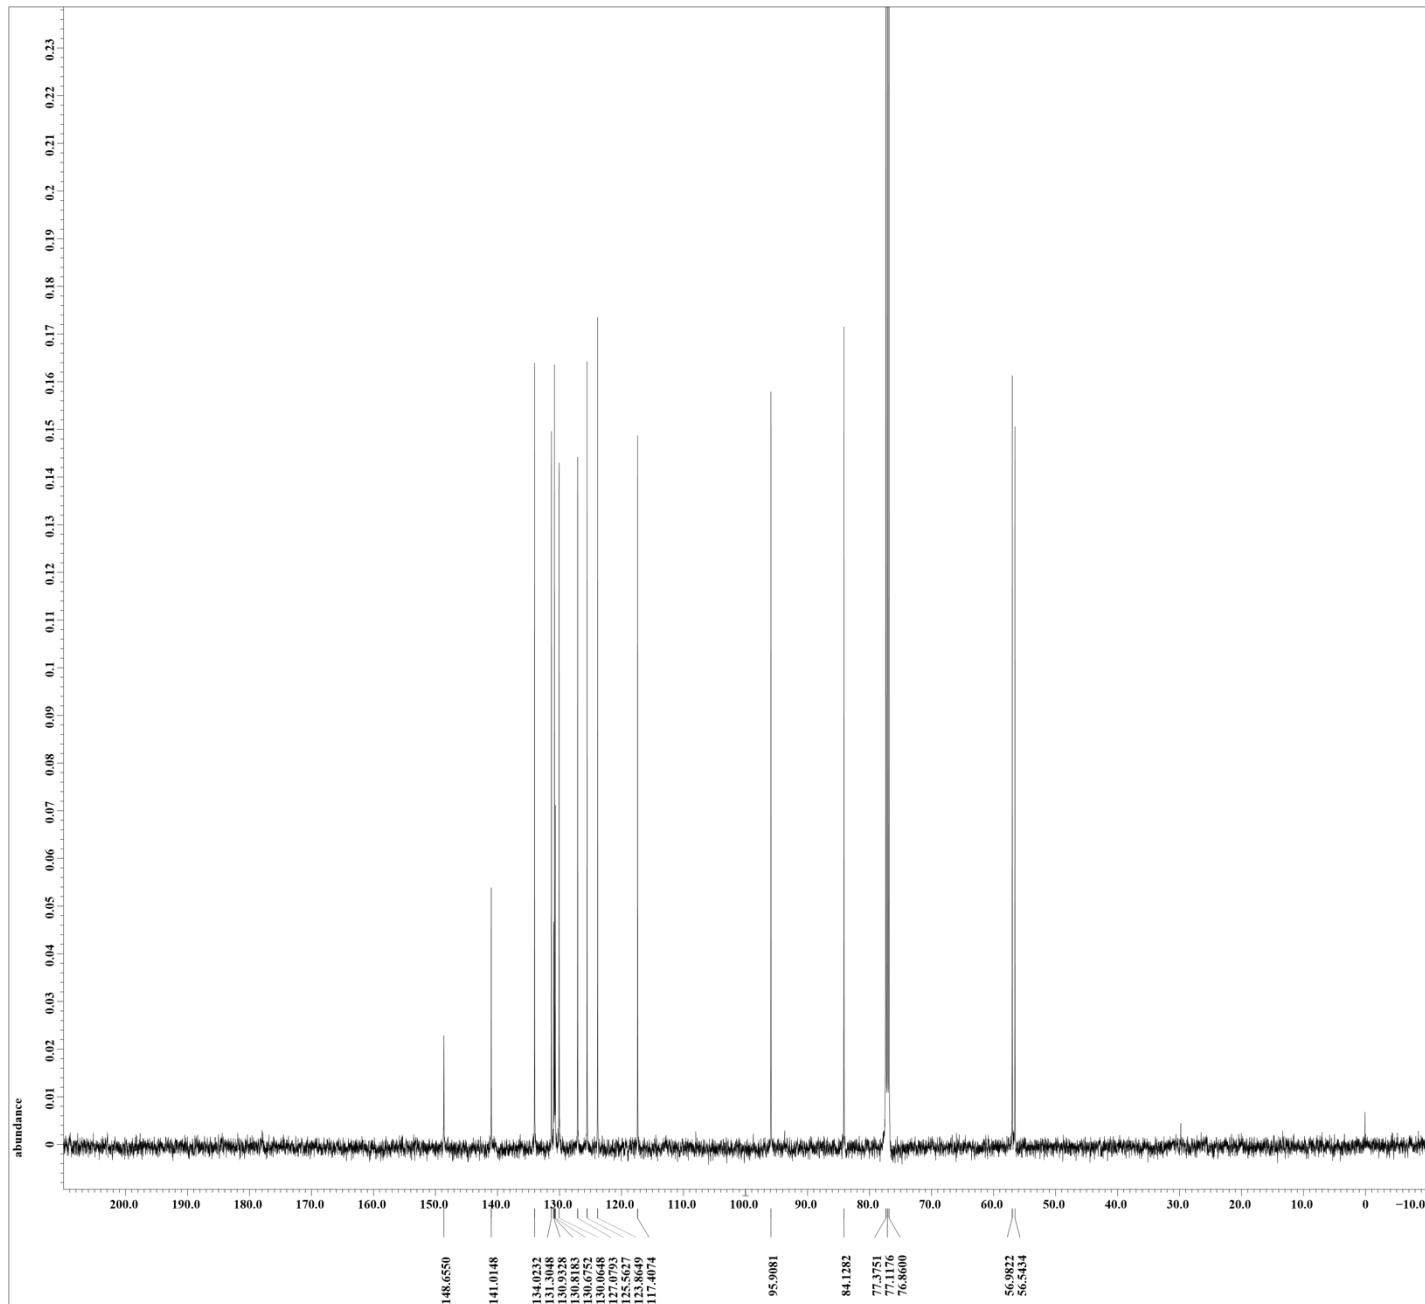

X : parts per Million : 13C



Filename = YT-20-01-21-8-8.jdf  
 Author = delta  
 Experiment = single\_pulse.ex2  
 Sample\_id = nsdi  
 Solvent = CHLOROFORM-D  
 Creation\_time = 7-APR-2000 17:25:44  
 Revision\_time = 30-JAN-2020 03:48:00  
 Current\_Time = 30-JAN-2020 03:48:07

Content = single\_pulse  
 Data format = 1D COMPLEX  
 Dim\_size = 13107  
 Dim\_title = 1H  
 Dim\_units = [ppm]  
 Dimensions = X  
 Site = ECA500  
 Spectrometer = DELTA2\_NMR

Field\_strength = 11.7473579[T] (500[MH]  
 X\_acq\_duration = 1.74587904[s]  
 X\_domain = 1H  
 X\_freq = 500.15991521[MHz]  
 X\_offset = 5.0[ppm]  
 X\_points = 16384  
 X\_prescans = 1  
 X\_resolution = 0.57277737[Hz]  
 X\_sweep = 9.38438438[kHz]  
 Irr\_domain = 1H  
 Irr\_freq = 500.15991521[MHz]  
 Irr\_offset = 5.0[ppm]  
 Tri\_domain = 1H  
 Tri\_freq = 500.15991521[MHz]  
 Tri\_offset = 5.0[ppm]  
 Clipped = FALSE  
 Mod\_return = 1  
 Scans = 8  
 Total\_scans = 8

X\_90\_width = 12[us]  
 X\_acq\_time = 1.74587904[s]  
 X\_angle = 45[deg]  
 X\_atn = 3.4[db]  
 X\_pulse = 6[us]  
 Irr\_mode = Off  
 Tri\_mode = Off  
 Dante\_presat = FALSE  
 Initial\_wait = 1[s]  
 Recvz\_gain = 50  
 Relaxation\_delay = 5[s]  
 Repetition\_time = 6.74587904[s]  
 Temp\_get = 22.9[dc]

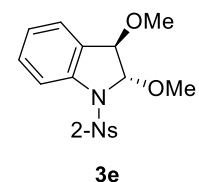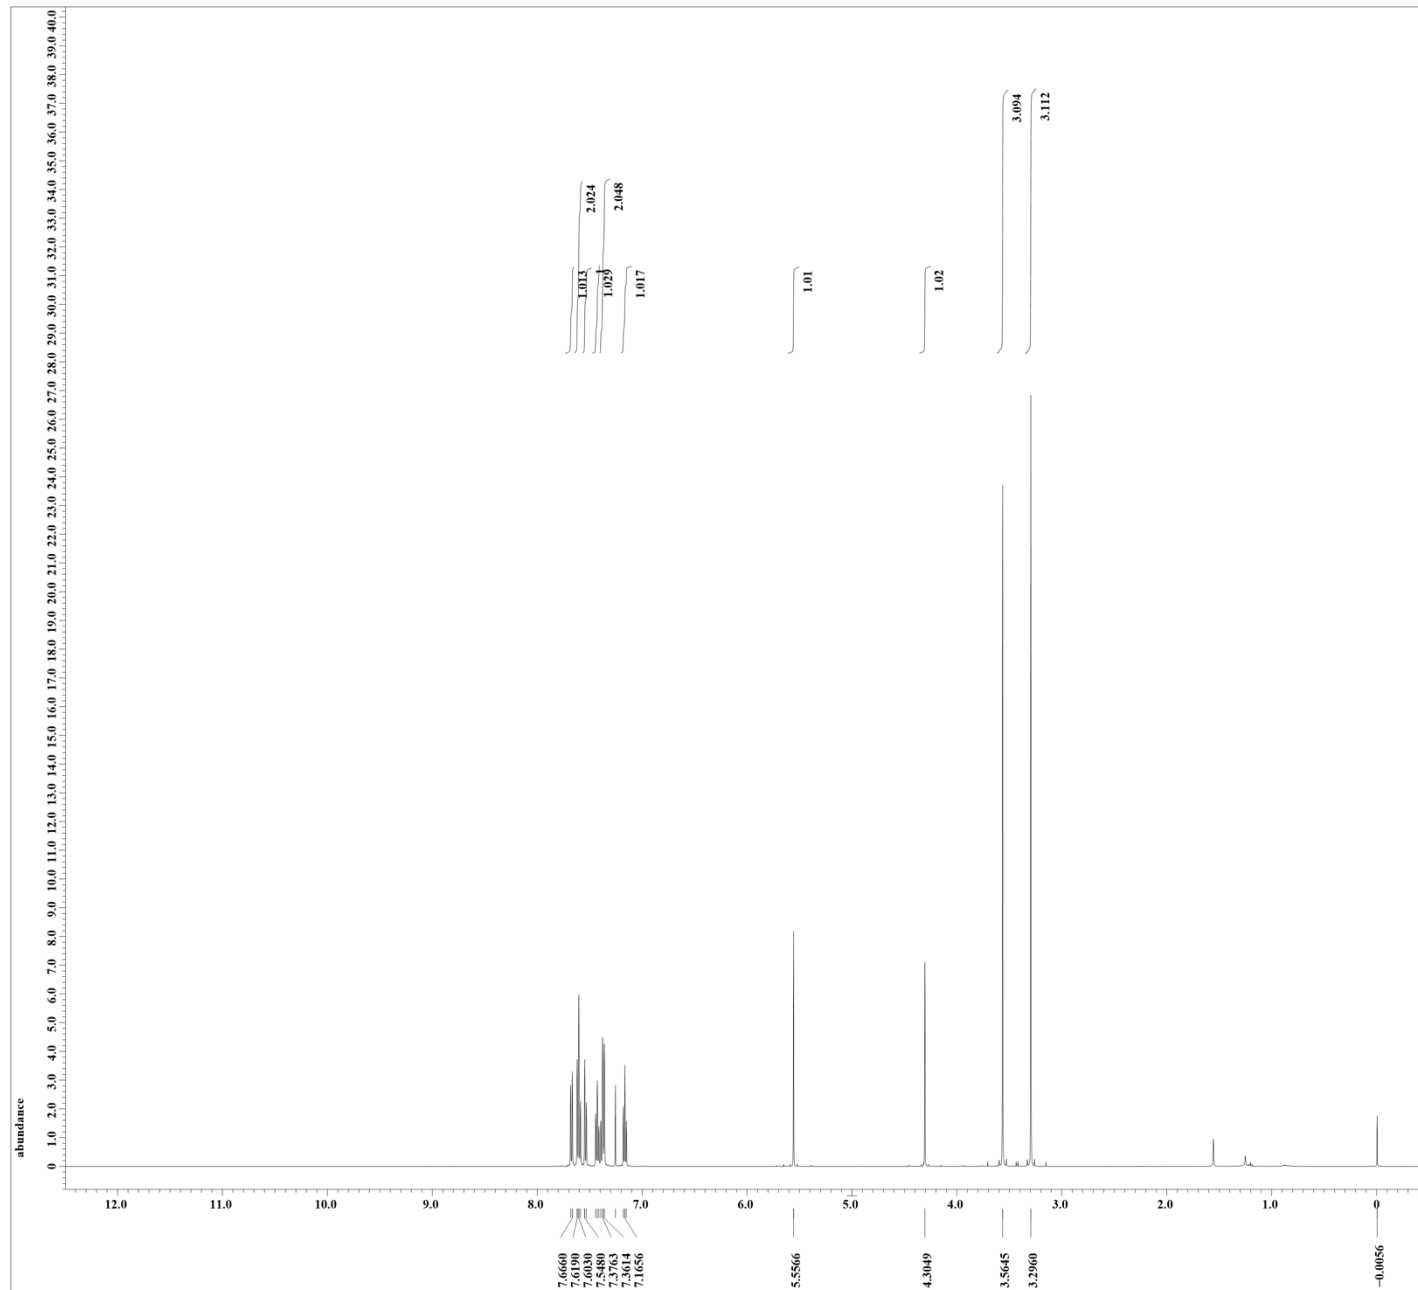

X : parts per Million : 1H



Filename = YT-20-01-21-8-6.jdf  
Author = delta  
Experiment = single\_pulse\_dec  
Sample\_id = nsdi  
Solvent = CHLOROFORM-D  
Creation\_time = 7-APR-2000 18:44:10  
Revision\_time = 30-JAN-2020 03:48:50  
Current\_time = 30-JAN-2020 03:49:11

Content = single pulse decouple  
Data format = 1D COMPLEX  
Dim\_size = 26214  
Dim\_title = 13C  
Dim\_units = [ppm]  
Dimensions = X  
Site = ECA500  
Spectrometer = DELTA2\_NMR

Field\_strength = 11.7473579[T] (500[MH]  
X\_acq\_duration = 0.83361792[s]  
X\_domain = 13C  
X\_freq = 125.76529768[MHz]  
X\_offset = 100[ppm]  
X\_points = 32768  
X\_prescans = 4  
X\_resolution = 1.19959034[Hz]  
X\_sweep = 39.3081761[kHz]  
Irr\_domain = 1H  
Irr\_freq = 500.15991521[MHz]  
Irr\_offset = 5.0[ppm]  
Clipped = FALSE  
Mod\_return = 1  
Scans = 1637  
Total\_scans = 1637

X\_90\_width = 12.8[us]  
X\_acq\_time = 0.83361792[s]  
X\_angle = 30[deg]  
X\_atn = 5.3[dB]  
X\_pulse = 4.26666667[us]  
Irr\_atn\_dec = 21.09[dB]  
Irr\_atn\_noe = 21.09[dB]  
Irr\_noise = WALTZ  
Decoupling = TRUE  
Initial\_wait = 1[s]  
Noe = TRUE  
Noe\_time = 2[s]  
Recvr\_gain = 54  
Relaxation\_delay = 2[s]  
Repetition\_time = 2.83361792[s]  
Temp\_get = 23.5[dc]

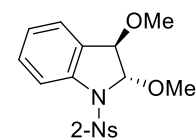

3e



X : parts per Million : 13C

50



Filename = YT-20-01-28-1-4.jdf  
 Author = delta  
 Experiment = single\_pulse.ex2  
 Sample\_id = 01281  
 Solvent = CHLOROFORM-D  
 Creation\_time = 28-JAN-2020 09:41:12  
 Revision\_time = 28-JAN-2020 10:38:07  
 Current\_time = 28-JAN-2020 14:16:37

Content = single\_pulse  
 Data\_format = 1D\_COMPLEX  
 Dim\_size = 13107  
 Dim\_title = 1H  
 Dim\_units = [ppm]  
 Dimensions = X  
 Site = ECA 500  
 Spectrometer = DELTA2\_NMR

Field\_strength = 11.62926421 [T] (500[M]  
 X\_acq\_duration = 1.76422912 [s]  
 X\_domain = 1H  
 X\_freq = 495.13191398 [MHz]  
 X\_offset = 5 [ppm]  
 X\_points = 16384  
 X\_prescans = 1  
 X\_resolution = 0.5668198 [Hz]  
 X\_sweep = 9.28677563 [kHz]  
 Irr\_domain = 1H  
 Irr\_freq = 495.13191398 [MHz]  
 Irr\_offset = 5 [ppm]  
 Tri\_domain = 1H  
 Tri\_freq = 495.13191398 [MHz]  
 Tri\_offset = 5 [ppm]  
 Clipped = FALSE  
 Mod\_return = 1  
 Scans = 8  
 Total\_scans = 8

X\_90\_width = 11.3 [us]  
 X\_acq\_time = 1.76422912 [s]  
 X\_angle = 45 [deg]  
 X\_atn = 3.3 [dB]  
 X\_pulse = 5.65 [us]  
 Irr\_mode = Off  
 Tri\_mode = Off  
 Dante\_presat = FALSE  
 Initial\_wait = 1 [s]  
 Recvz\_gain = 48  
 Relaxation\_delay = 5 [s]  
 Repetition\_time = 6.76422912 [s]  
 Temp\_get = 23.2 [dC]

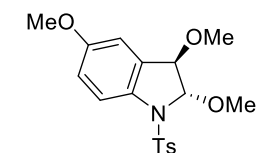

3f

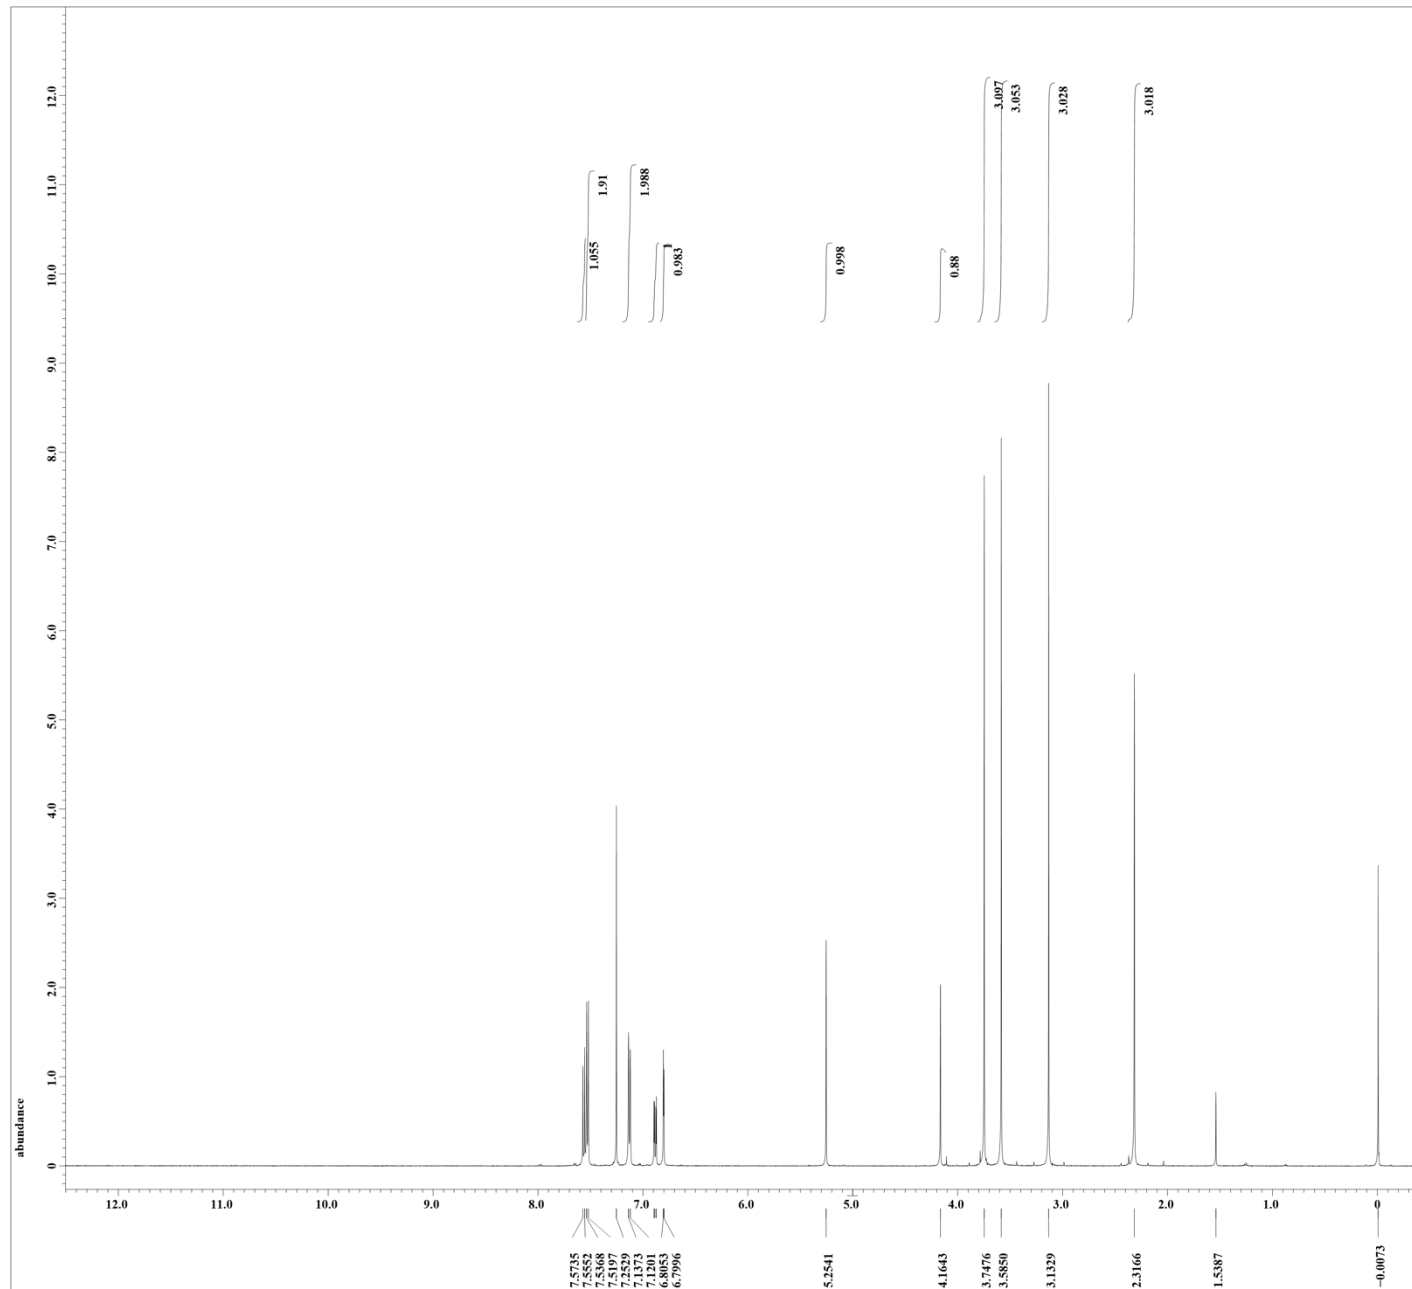

X : parts per Million : 1H



Filename = VT-20-01-28-1-6.jdf  
Author = delta  
Experiment = single\_pulse\_dec  
Sample\_id = 01281  
Solvent = CHLOROFORM-D  
Creation\_time = 28-JAN-2020 13:19:31  
Revision\_time = 28-JAN-2020 14:14:42  
Current\_time = 28-JAN-2020 14:17:19

Content = single pulse decouple  
Data format = 1D COMPLEX  
Dim\_size = 26214  
Dim\_title = 13C  
Dim\_units = [ppm]  
Dimensions = X  
Site = ECA 500  
Spectrometer = DELTA2\_NMR

Field\_strength = 11.62926421[T] (500[M]  
X\_acq\_duration = 0.8388608[s]  
X\_domain = 13C  
X\_freq = 124.5010059[MHz]  
X\_offset = 100[ppm]  
X\_points = 32768  
X\_prescans = 4  
X\_resolution = 1.1920929[Hz]  
X\_sweep = 39.0625[kHz]  
Irr\_domain = 1H  
Irr\_freq = 495.13191398[MHz]  
Irr\_offset = 5[ppm]  
Clipped = FALSE  
Mod\_return = 1  
Scans = 4561  
Total\_scans = 4561

X\_90\_width = 10.1[us]  
X\_acq\_time = 0.8388608[s]  
X\_angle = 30[deg]  
X\_atn = 9.5[dB]  
X\_pulse = 3.36666667[us]  
Irr\_atn\_dec = 21.51[dB]  
Irr\_atn\_noe = 21.51[dB]  
Irr\_noise = WALTZ  
Decoupling = TRUE  
Initial\_wait = 1[s]  
Noe = TRUE  
Noe\_time = 2[s]  
Recvr\_gain = 60  
Relaxation\_delay = 2[s]  
Repetition\_time = 2.8388608[s]  
Temp\_get = 23.9[dc]

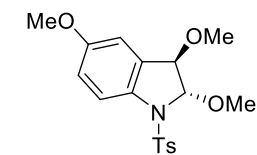

3f

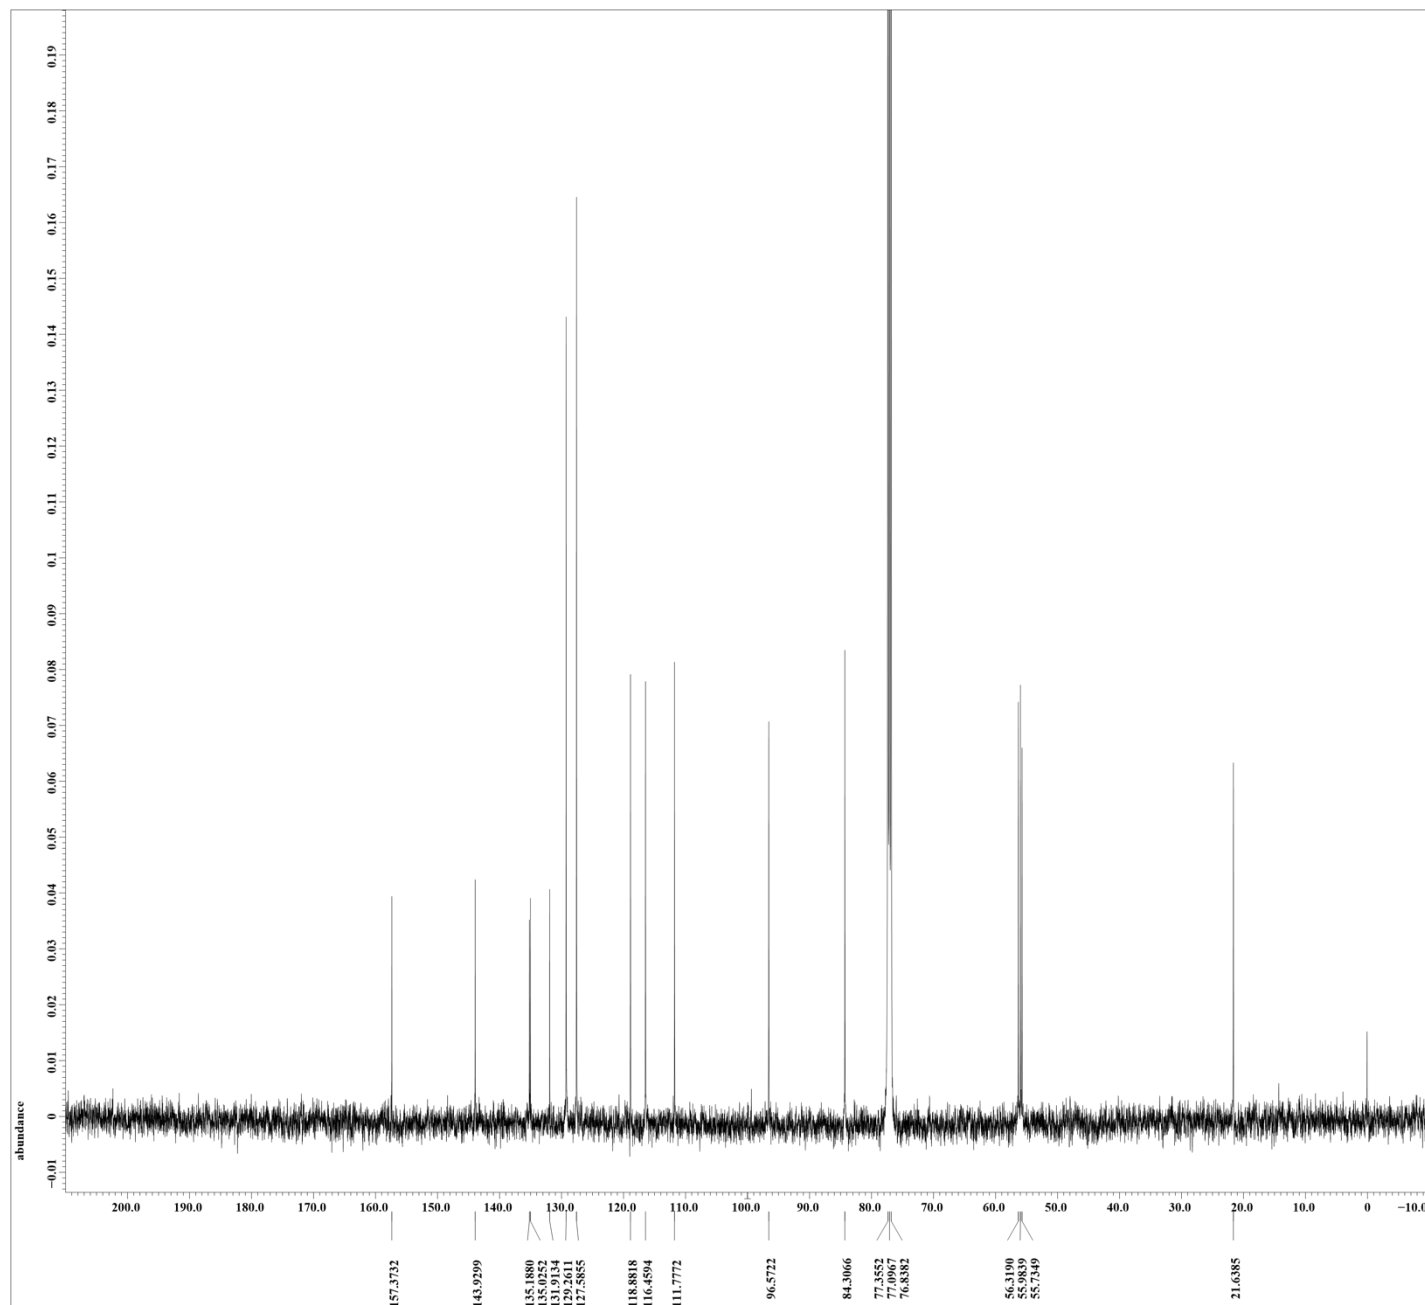

X : parts per Million : 13C



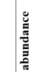

53



**3g**

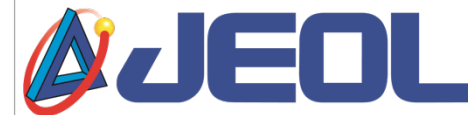

```

Filename           = YT-2010-01-18-3-5.jdf
Author             = delta
Experiment          = single_pulse.ex2
Sample_id          = fz2
Solvent            = DMSO-D6FORM-D
Creation time       = 18-JAN-2020 16:40:42
Revision time       = 30-JAN-2020 03:39:27
Current time        = 30-JAN-2020 03:39:36

Content            = single_pulse
Data format         = 1D COMPLEX
Dim 1_x1            = 110107
Dim 1_title         = 1H
Dim 1_units         = [ppm]
Dimensions          = X
Site                = ECA 500
Spectrometer        = DELTA2 NMR

Field_strength      = 11.62926421[T] (500[M]
X_acq_duration      = 1.76422912[s]
X_domain            = 1H
X_freq              = 495.13191398[MHz]
X_offset            = 5[ppm]
X_points            = 15384
X_prescans           = 1
X_resolution        = 0.5668198[Hz]
X_resamp            = 1.28677563[kHz]
X_sweep             = 1H
Irr_mode            = Off
Irr_freq            = 495.13191398[MHz]
Irr_offset          = 5[ppm]
Irr_domain          = 1H
Tri_freq            = 495.13191398[MHz]
Tri_offset          = 5[ppm]
Clipped             = TRUE
Mod_return          =
Scans               = 8
Total_scans         = 8

X_90_width          = 11.3[us]
X_acq_time          = 1.76422912[s]
X_angle             = 45[deg]
X_atn               = 3[db]
X_pulse             = 5.65[us]
Irr_mode            = Off
Irr_mod             = Off
Tri_mod             = DANTE presat
Initial_wait        = 1[s]
Recvr_gain          = 50
Relaxation_delay     = 2[s]
Repetition_time      = 1.76422912[s]
Temp_get            = 23.2[.dC]

```



Filename = YT-20-01-18-3-3.jdf  
Author = delta  
Experiment = single\_pulse\_dec  
Sample\_id = fr2  
Solvent = CHLOROFORM-D  
Creation\_time = 18-JAN-2020 19:20:12  
Revision\_time = 30-JAN-2020 03:40:06  
Current\_time = 30-JAN-2020 03:40:19

Content = single\_pulse\_decouple  
Data\_format = 1D COMPLEX  
Dim\_size = 26214  
Dim\_title = 13C  
Dim\_units = [ppm]  
Dimensions = X  
Site = ECA 500  
Spectrometer = DELTA2\_NMR

Field\_strength = 11.62926421[T] (500[M]  
X\_acq\_duration = 0.8388608[s]  
X\_domain = 13C  
X\_freq = 124.5010059[MHz]  
X\_offset = 100[ppm]  
X\_points = 32768  
X\_prescans = 4  
X\_resolution = 1.1920929[Hz]  
X\_sweep = 39.0625[kHz]  
Irr\_domain = 1H  
Irr\_freq = 495.13191398[MHz]  
Irr\_offset = 5[ppm]  
Clipped = FALSE  
Mod\_return = 1  
Scans = 1711  
Total\_scans = 1711

X\_90\_width = 10.1[us]  
X\_acq\_time = 0.8388608[s]  
X\_angle = 30[deg]  
X\_atn = 9.5[dB]  
X\_pulse = 3.36666667[us]  
Irr\_atn\_dec = 21.51[dB]  
Irr\_atn\_noe = 21.51[dB]  
Irr\_noise = WALTZ  
Decoupling = TRUE  
Initial\_wait = 1[s]  
Noe = TRUE  
Noe\_time = 2[s]  
Recvr\_gain = 60  
Relaxation\_delay = 2[s]  
Repetition\_time = 2.8388608[s]  
Temp\_get = 24[dc]

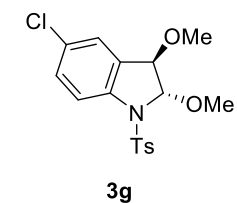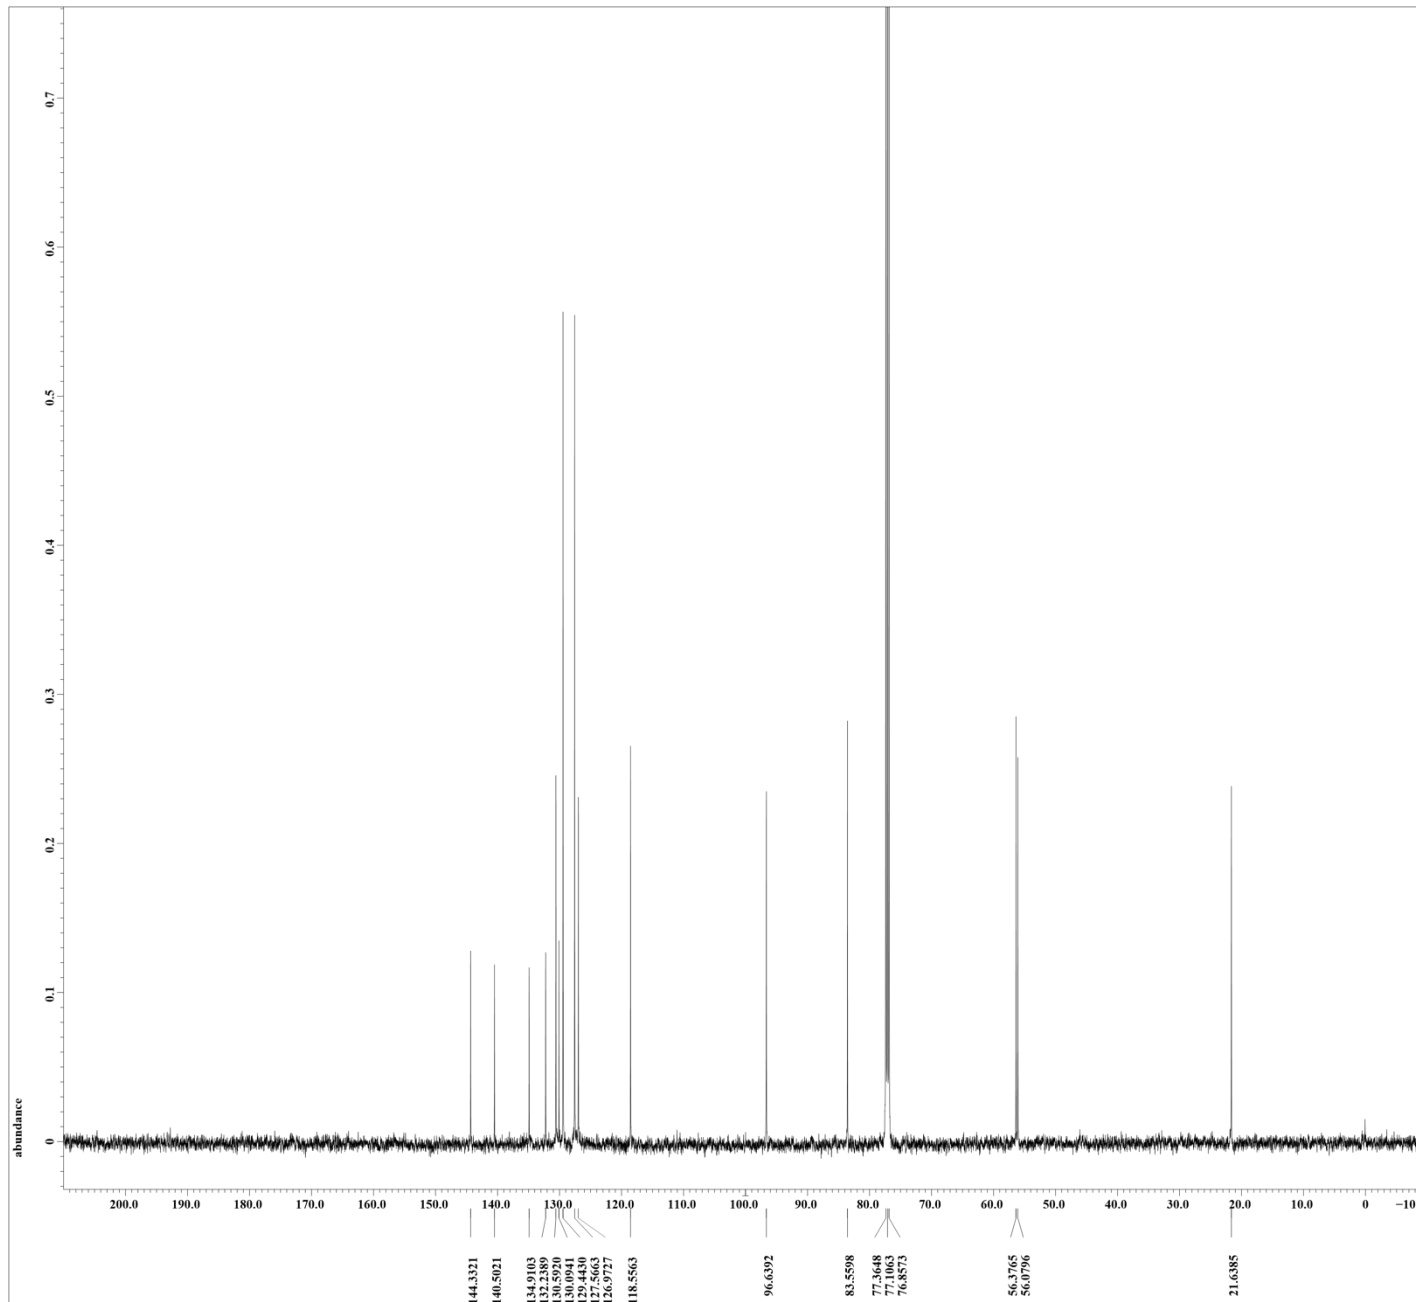

X : parts per Million : 13C



Filename = YT-20-01-27-5-8.jdf  
Author = delta  
Experiment = single\_pulse.ex2  
Sample\_id = 01275  
Solvent = CHLOROFORM-D  
Creation\_time = 27-JAN-2020 18:34:03  
Revision\_time = 30-JAN-2020 04:07:47  
Current\_Time = 30-JAN-2020 04:07:55

Content = single\_pulse  
Data format = 1D COMPLEX  
Dim\_size = 13107  
Dim\_title = 1H  
Dim\_units = [ppm]  
Dimensions = X  
Site = ECA 500  
Spectrometer = DELTA2\_NMR

Field\_strength = 11.62926421[T] (500[M]  
X\_acq\_duration = 1.76422912[s]  
X\_domain = 1H  
X\_freq = 495.13191398[MHz]  
X\_offset = 5[ppm]  
X\_points = 16384  
X\_prescans = 1  
X\_resolution = 0.5668198[Hz]  
X\_sweep = 9.28677563[kHz]  
Irr\_domain = 1H  
Irr\_freq = 495.13191398[MHz]  
Irr\_offset = 5[ppm]  
Tri\_domain = 1H  
Tri\_freq = 495.13191398[MHz]  
Tri\_offset = 5[ppm]  
Clipped = FALSE  
Mod\_return = 1  
Scans = 8  
Total\_scans = 8

X\_90\_width = 11.3[us]  
X\_acq\_time = 1.76422912[s]  
X\_angle = 45[deg]  
X\_atn = 3.3[db]  
X\_pulse = 5.65[us]  
Irr\_mode = Off  
Tri\_mode = Off  
Dante\_presat = FALSE  
Initial\_wait = 1[s]  
Recvr\_gain = 48  
Relaxation\_delay = 5[s]  
Repetition\_time = 6.76422912[s]  
Temp\_get = 23.3[dc]

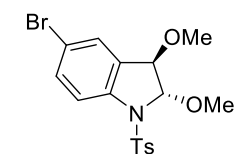

3h

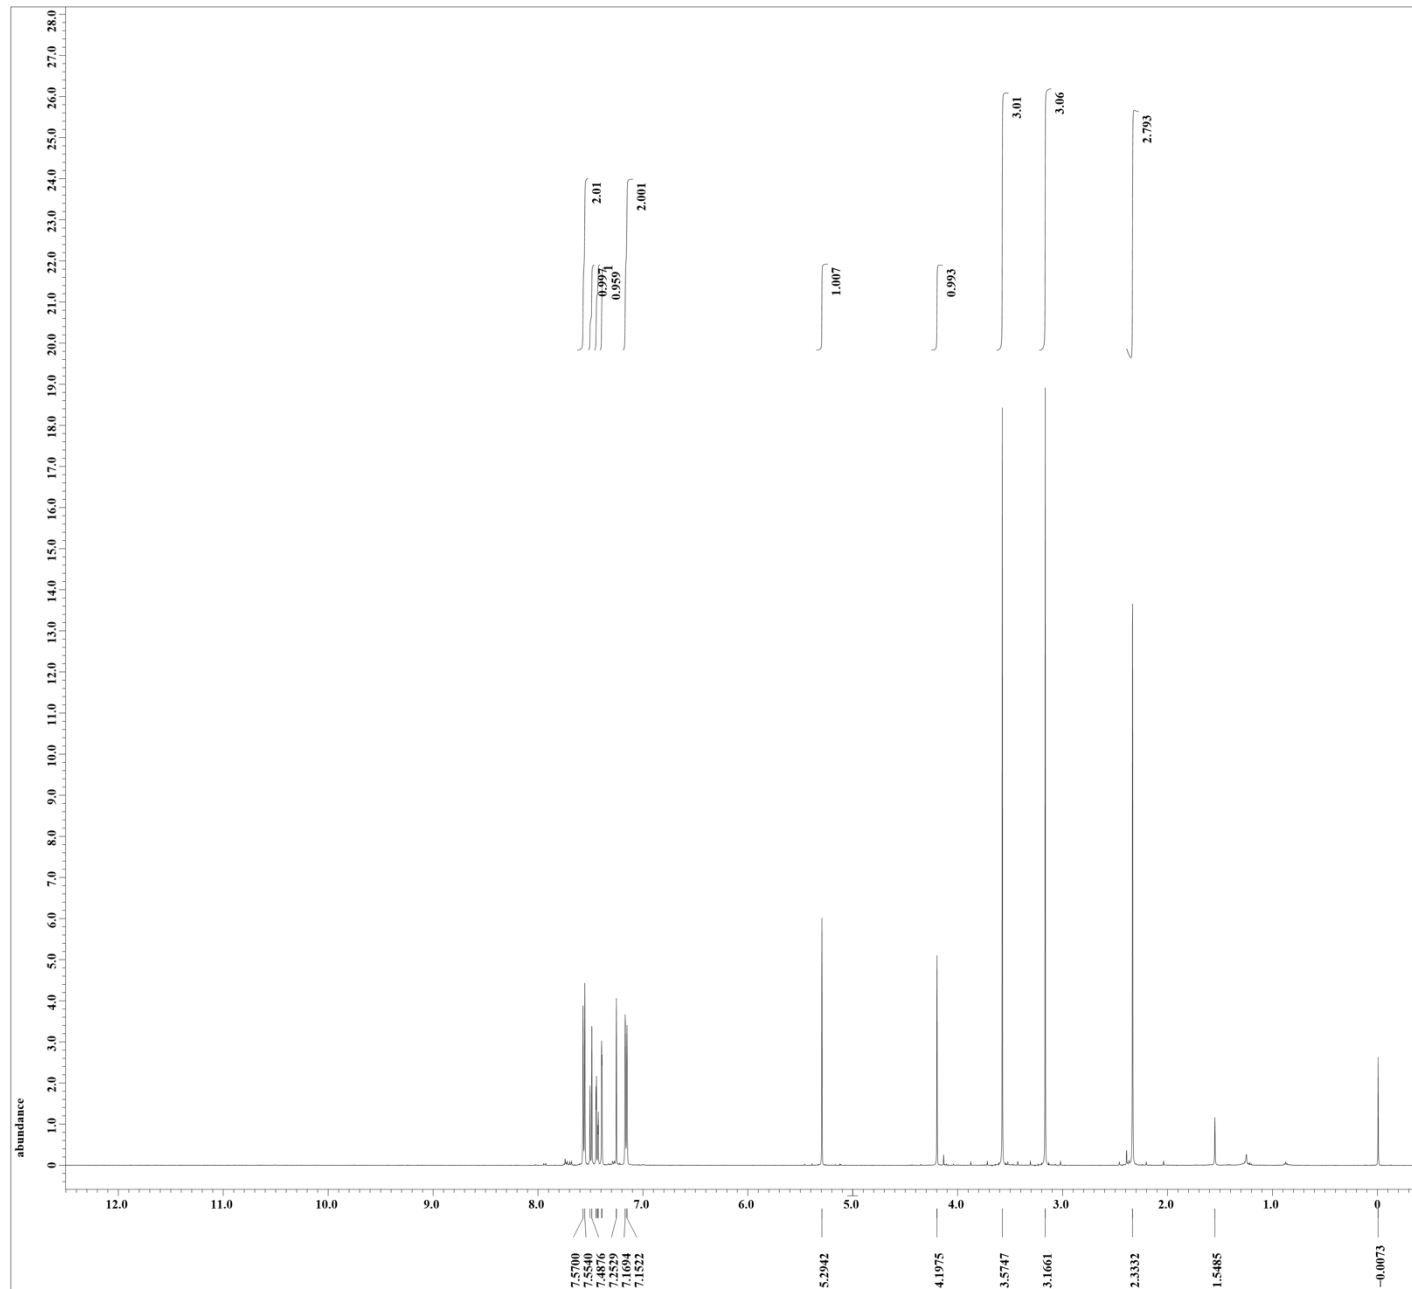

X : parts per Million : 1H



Filename = YT-20-01-27-5-6.jdf  
Author = delta  
Experiment = single\_pulse\_dec  
Sample\_id = 01275  
Solvent = CHLOROFORM-D  
Creation\_time = 27-JAN-2020 19:37:58  
Revision\_time = 30-JAN-2020 04:08:40  
Current\_time = 30-JAN-2020 04:08:52  
  
Content = single\_pulse\_decouple  
Data\_format = 1D COMPLEX  
Dim\_size = 26214  
Dim\_title = 13C  
Dim\_units = [ppm]  
Dimensions = X  
Site = ECA 500  
Spectrometer = DELTA2\_NMR  
  
Field\_strength = 11.62926421[T] (500[M]  
X\_acq\_duration = 0.8388608[s]  
X\_domain = 13C  
X\_freq = 124.5010059[MHz]  
X\_offset = 100[ppm]  
X\_points = 32768  
X\_prescans = 4  
X\_resolution = 1.1920929[Hz]  
X\_sweep = 39.0625[kHz]  
Irr\_domain = 1H  
Irr\_freq = 495.13191398[MHz]  
Irr\_offset = 5[ppm]  
Clipped = FALSE  
Mod\_return = 1  
Scans = 1321  
Total\_scans = 1321  
  
X\_90\_width = 10.1[us]  
X\_acq\_time = 0.8388608[s]  
X\_angle = 30[deg]  
X\_atn = 9.5[dB]  
X\_pulse = 3.36666667[us]  
Irr\_atn\_dec = 21.51[dB]  
Irr\_atn\_noe = 21.51[dB]  
Irr\_noise = WALTZ  
Decoupling = TRUE  
Initial\_wait = 1[s]  
Noe = TRUE  
Noe\_time = 2[s]  
Recvr\_gain = 60  
Relaxation\_delay = 2[s]  
Repetition\_time = 2.8388608[s]  
Temp\_get = 23.9[dc]

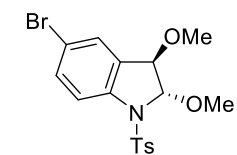

3h

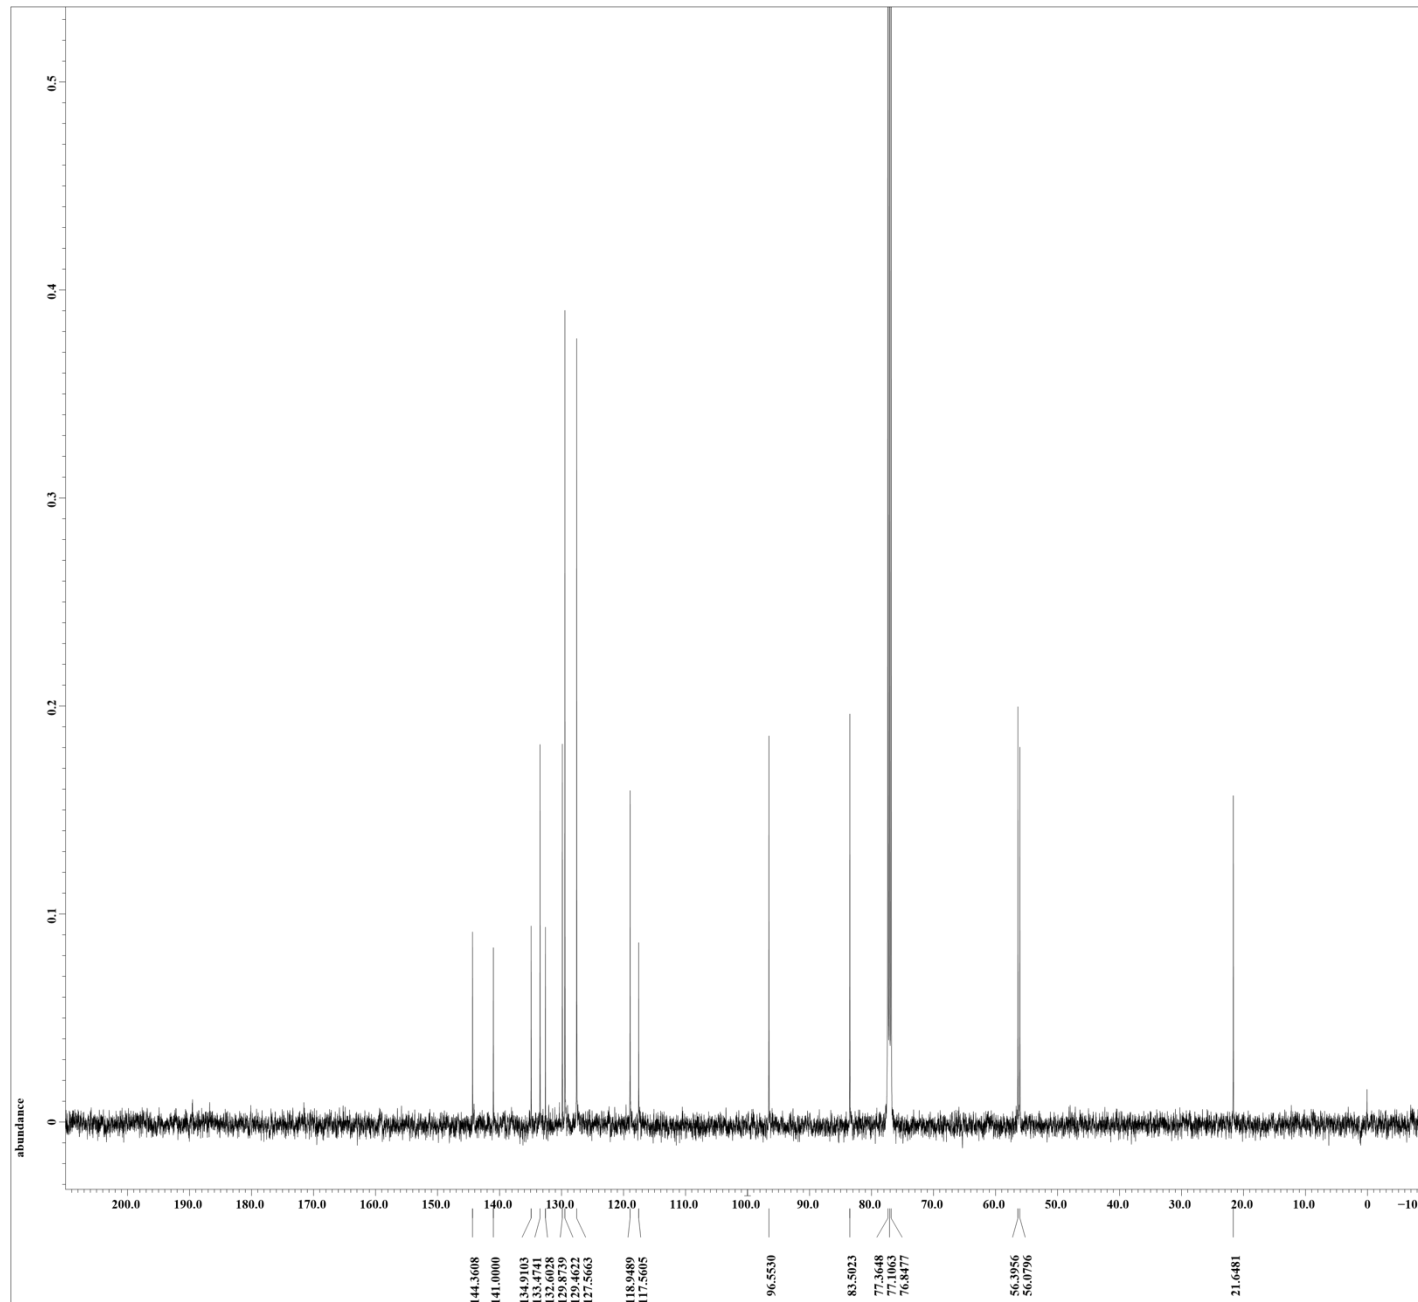

X : parts per Million : 13C



```

Filename      = YT-20-01-20-2-5.jdf
Author       = delta
Experiment    = single_pulse.ex2
Sample_id     = 4 fr2
Solvent       = CHLOROFORM-D
Creation time  = 6-APR-2000 11:45:48
Revision time  = 30-JAN-2020 03:42:35
Current_Time  = 30-JAN-2020 03:42:52

Content       = single_pulse
Data format   = 1D COMPLEX
Dim_size      = 13107
Dim_title     = 1H
Dim_units     = [ppm]
Dimensions    = X
Site          = ECA500
Spectrometer  = DELTA2_NMR

Field strength = 11.7473579 [T] (500 [MH]
X_acq_duration = 1.74587904 [s]
X_domain       = 1H
X_freq         = 500.15991521 [MHz]
X_offset       = 5.0 [ppm]
X_points       = 16384
X_prescans     = 1
X_resolution   = 0.57277737 [Hz]
X_sweep        = 9.38438438 [kHz]
Irr_domain     = 1H
Irr_freq       = 500.15991521 [MHz]
Irr_offset     = 5.0 [ppm]
Tri_domain     = 1H
Tri_freq       = 500.15991521 [MHz]
Tri_offset     = 5.0 [ppm]
Clipped        = TRUE
Mod_return     = 1
Scans          = 8
Total_scans    = 8

X_90_width     = 12 [us]
X_acq_time     = 1.74587904 [s]
X_angle        = 45 [deg]
X_atn          = 3.4 [dB]
X_pulse        = 6 [us]
Irr_mode       = Off
Tri_mode       = Off
Dante_presat   = FALSE
Initial_wait    = 1 [s]
Recvr_gain     = 50
Relaxation_delay = 5 [s]
Repetition_time = 6.74587904 [s]
Temp_get       = 23.7 [dc]
  
```

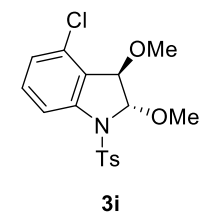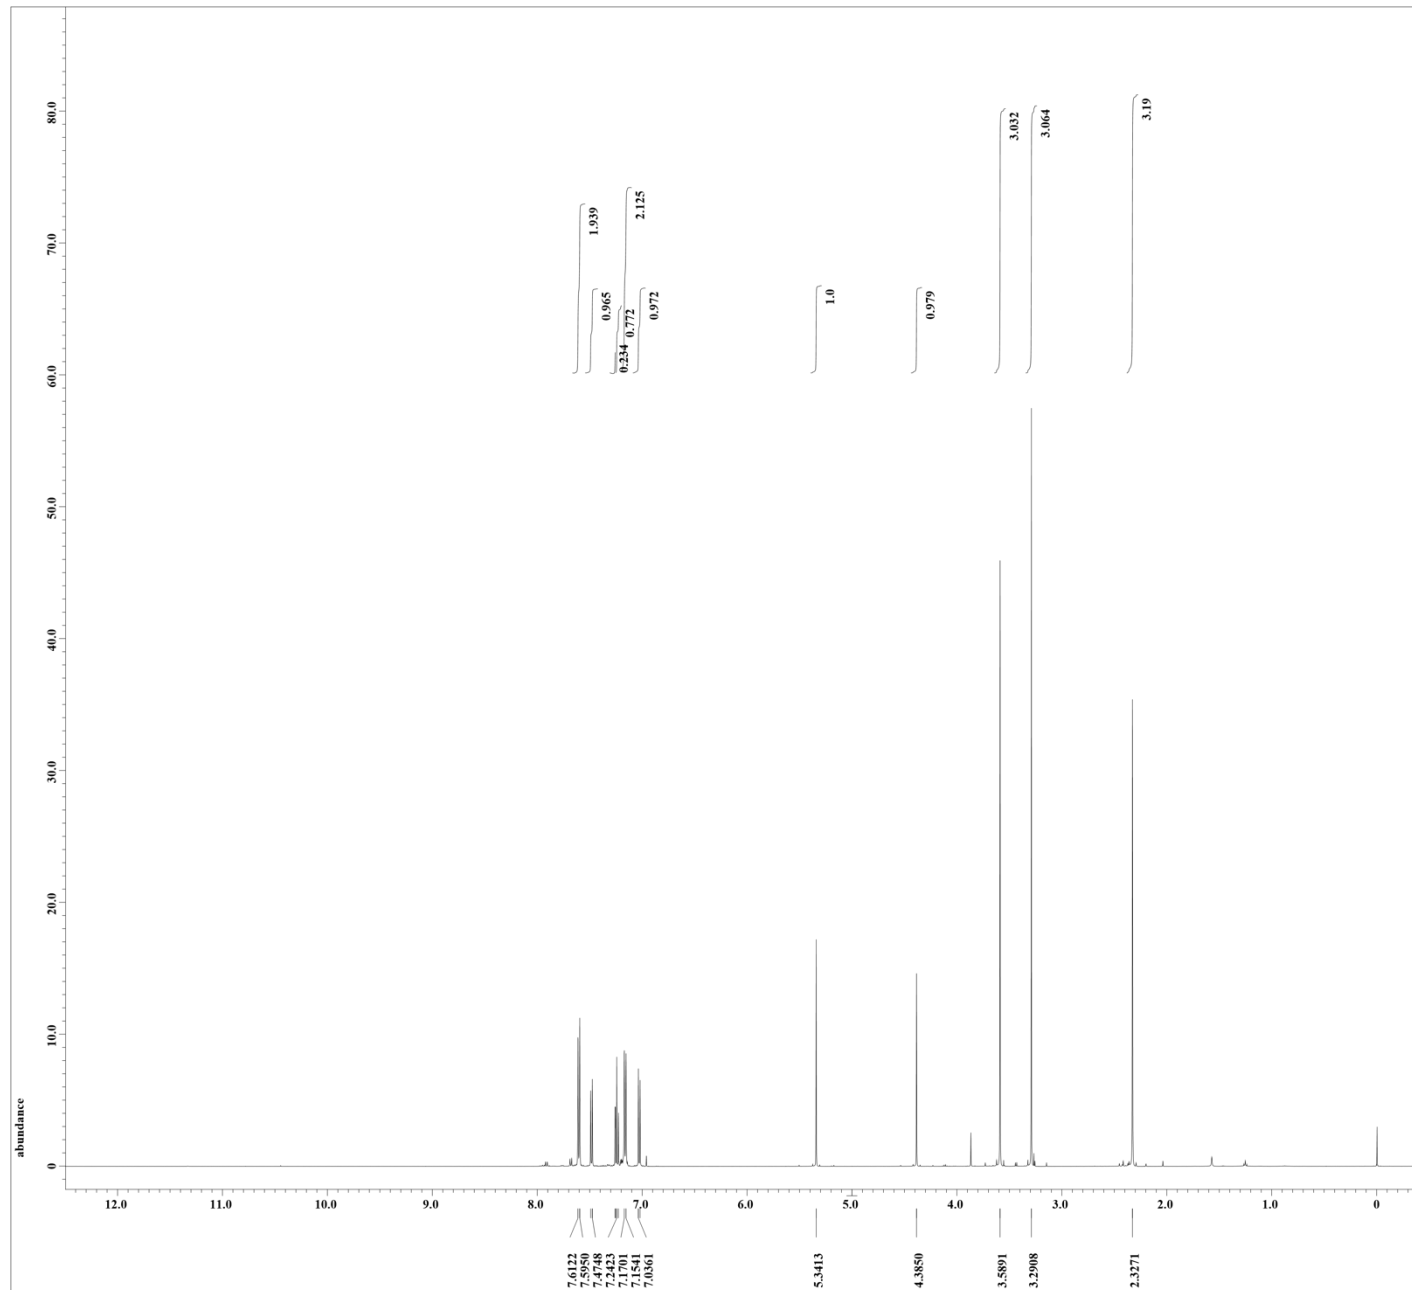

X : parts per Million : 1H



```

Filename      = YT-20-01-20-2-4.jdf
Author       = delta
Experiment   = single_pulse_dec
Sample_id    = 4 fr2
Solvent      = CHLOROFORM-D
Creation_time = 6-APR-2000 13:11:52
Revision_time = 30-JAN-2020 03:43:46
Current_time  = 30-JAN-2020 03:43:57

Content      = single pulse decouple
Data format  = 1D COMPLEX
Dim_size     = 26214
Dim_title    = 13C
Dim_units    = [ppm]
Dimensions   = X
Site         = ECA500
Spectrometer = DELTA2_NMR

Field_strength = 11.7473579[T] (500[MH]
X_acq_duration = 0.83361792[s]
X_domain       = 13C
X_freq         = 125.76529768[MHz]
X_offset       = 100[ppm]
X_points       = 32768
X_prescans     = 4
X_resolution   = 1.19959034[Hz]
X_sweep        = 39.3081761[kHz]
Irr_domain     = 1H
Irr_freq       = 500.15991521[MHz]
Irr_offset     = 5.0[ppm]
Clipped        = FALSE
Mod_return     = 1
Scans          = 1809
Total_scans    = 1809

X_90_width    = 12.8[us]
X_acq_time    = 0.83361792[s]
X_angle       = 30[deg]
X_atn         = 5.3[dB]
X_pulse       = 4.26666667[us]
Irr_atn_dec   = 21.09[dB]
Irr_atn_noe   = 21.09[dB]
Irr_noise     = WALTZ
Decoupling    = TRUE
Initial_wait   = 1[s]
Noe            = TRUE
Noe_time      = 2[s]
Recvr_gain    = 54
Relaxation_delay = 2[s]
Repetition_time = 2.83361792[s]
Temp_get      = 24.5[dc]
  
```

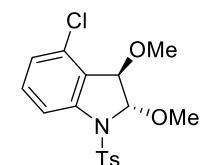

3i

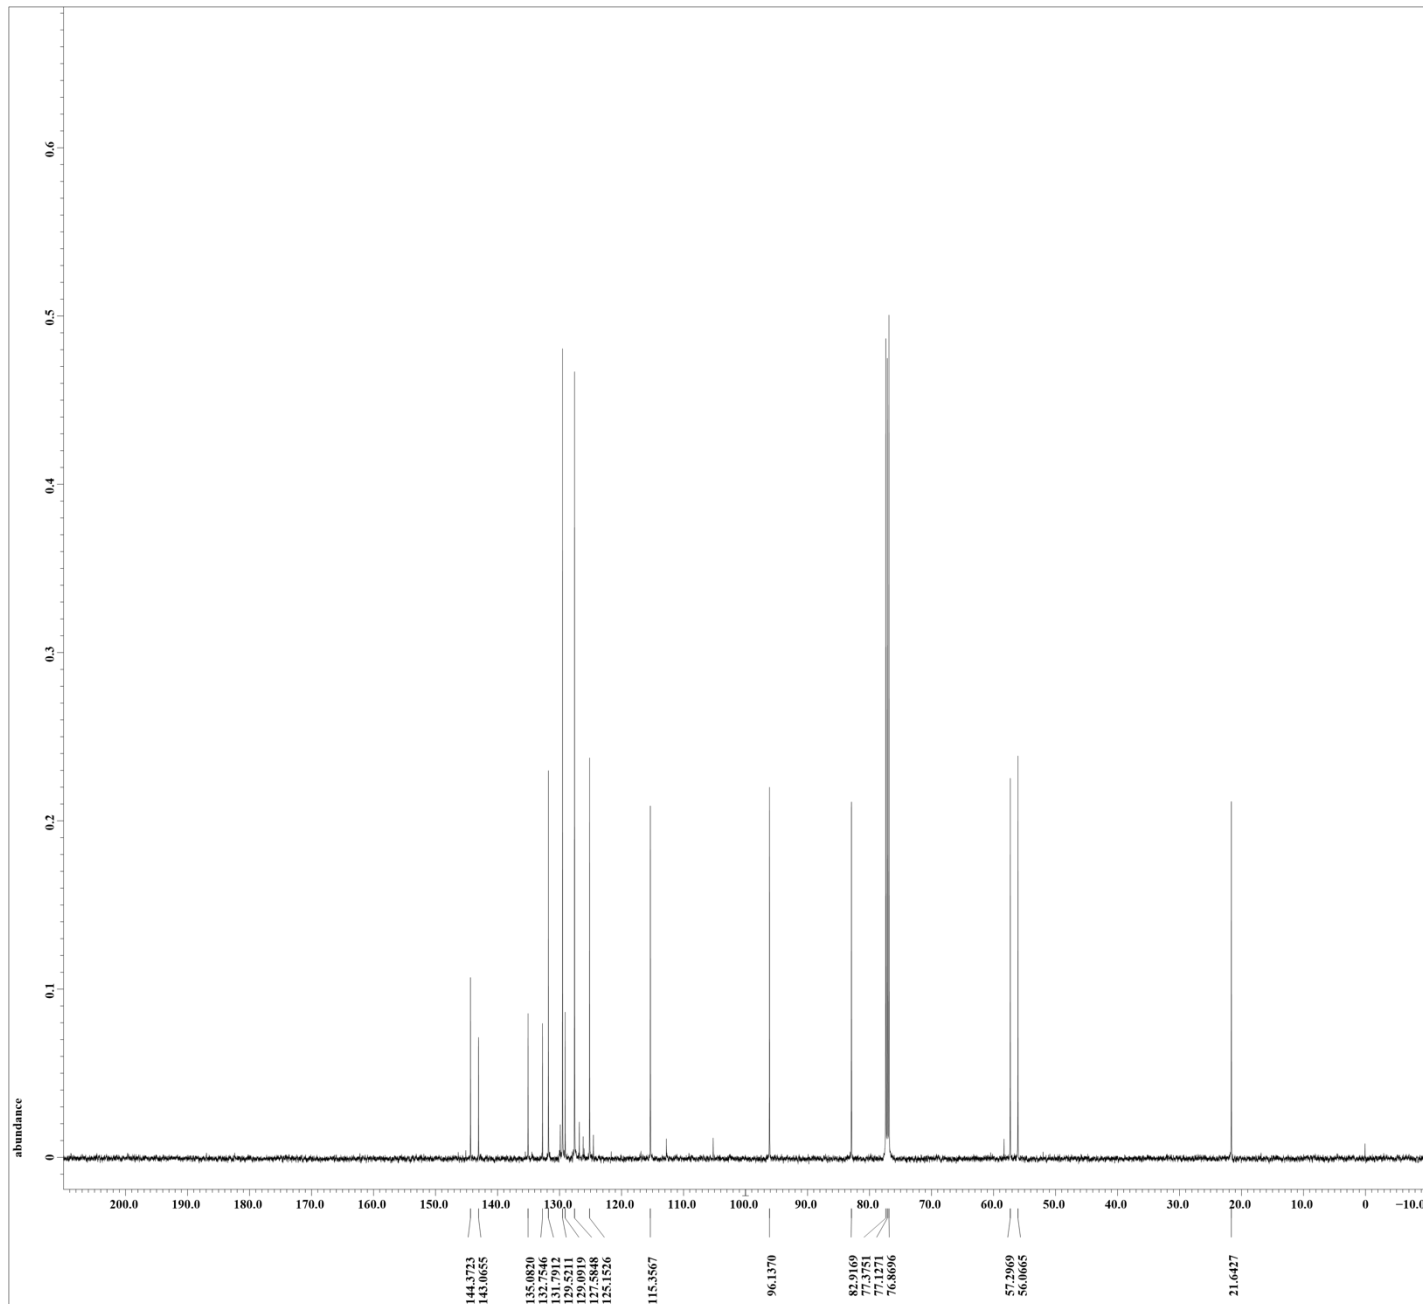

X : parts per Million : 13C



Filename = YT-20-01-24-2-5.jdf  
 Author = delta  
 Experiment = single\_pulse.ex2  
 Sample\_id = 161\_fri  
 Solvent = CHLOROFORM-D  
 Creation\_time = 10-APR-2000 13:17:57  
 Revision\_time = 30-JAN-2020 03:56:19  
 Current\_time = 30-JAN-2020 03:56:27

Content = single\_pulse  
 Data\_format = 1D\_COMPLEX  
 Dim\_size = 13107  
 Dim\_title = 1H  
 Dim\_units = [ppm]  
 Dimensions = X  
 Site = ECA500  
 Spectrometer = DELTA2\_NMR

Field\_strength = 11.7473579[T] (500[MH]  
 X\_acq\_duration = 1.74587904[s]  
 X\_domain = 1H  
 X\_freq = 500.15991521[MHz]  
 X\_offset = 5.0[ppm]  
 X\_points = 16384  
 X\_prescans = 1  
 X\_resolution = 0.57277737[Hz]  
 X\_sweep = 9.38438438[kHz]  
 Irr\_domain = 1H  
 Irr\_freq = 500.15991521[MHz]  
 Irr\_offset = 5.0[ppm]  
 Tri\_domain = 1H  
 Tri\_freq = 500.15991521[MHz]  
 Tri\_offset = 5.0[ppm]  
 Clipped = FALSE  
 Mod\_return = 1  
 Scans = 8  
 Total\_scans = 8

X\_90\_width = 12[us]  
 X\_acq\_time = 1.74587904[s]  
 X\_angle = 45[deg]  
 X\_atn = 3.4[db]  
 X\_pulse = 6[us]  
 Irr\_mode = Off  
 Tri\_mode = Off  
 Dante\_presat = FALSE  
 Initial\_wait = 1[s]  
 Recvz\_gain = 50  
 Relaxation\_delay = 5[s]  
 Repetition\_time = 6.74587904[s]  
 Temp\_get = 22.7[dc]

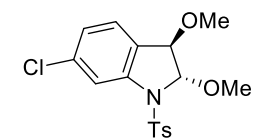

3j

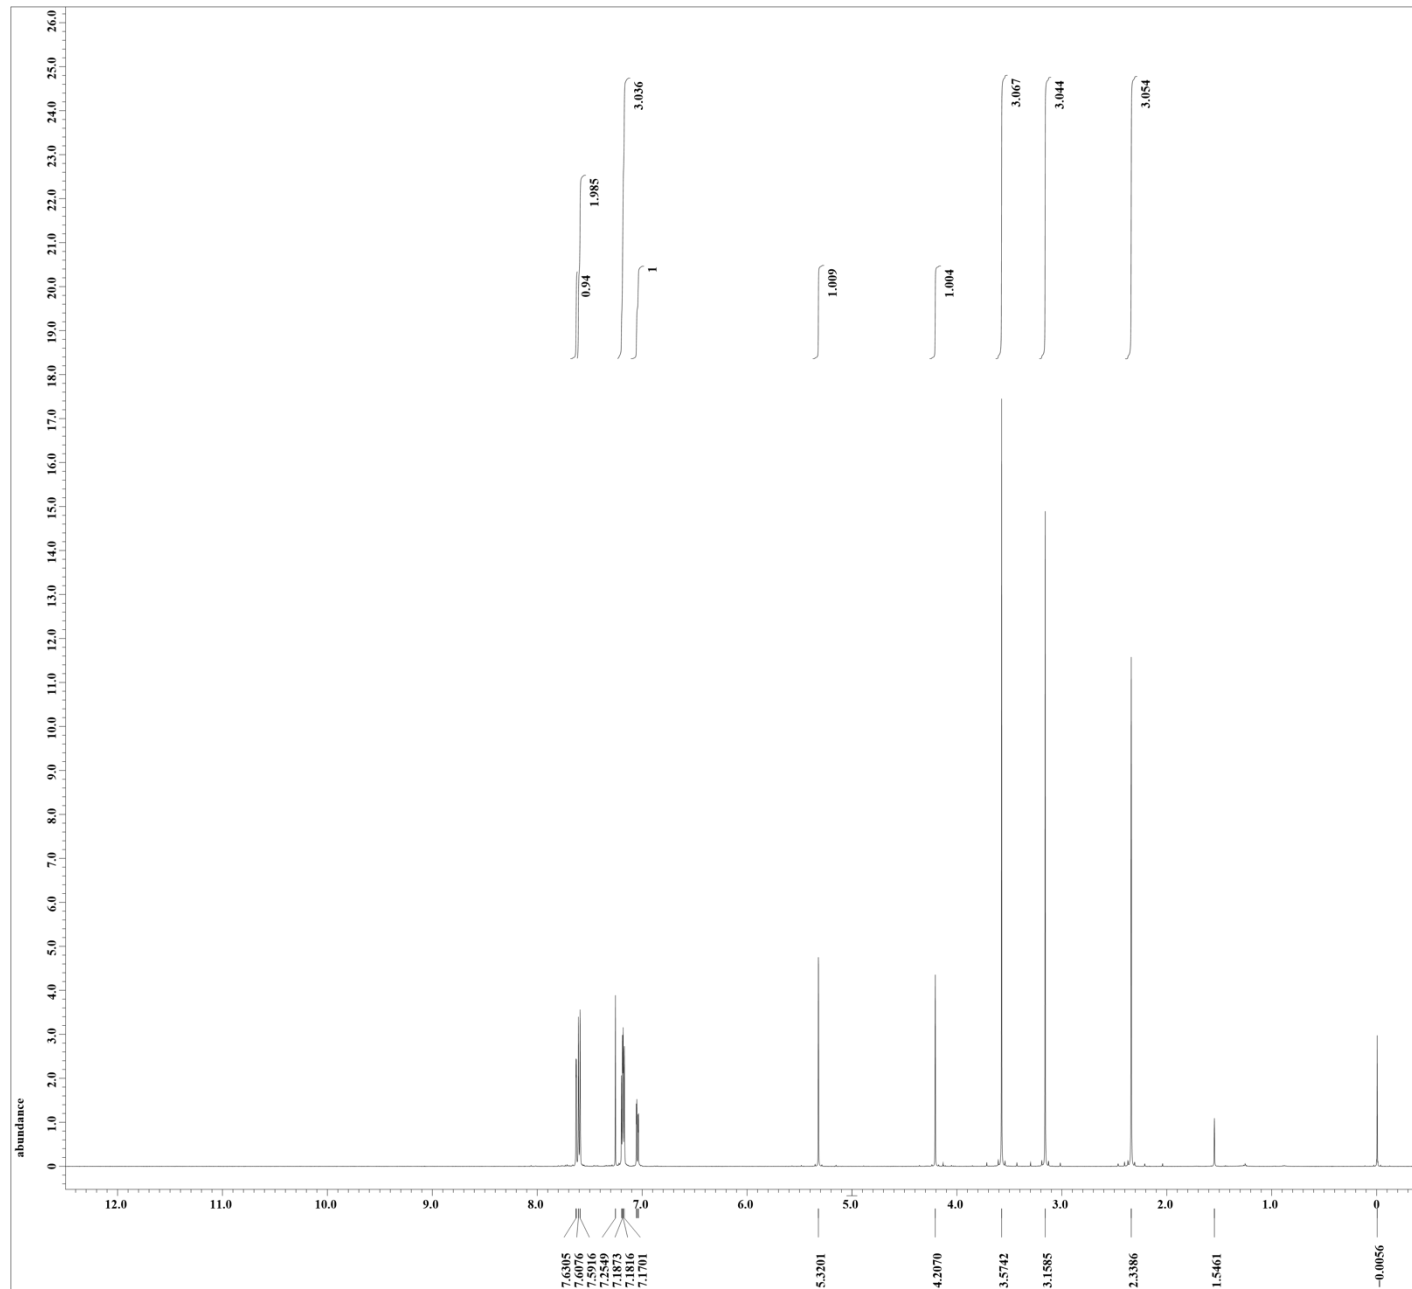

X : parts per Million : 1H



Filename = YT-20-01-24-2-3.jdf  
Author = delta  
Experiment = single\_pulse\_dec  
Sample\_id = 161\_fri  
Solvent = CHLOROFORM-D  
Creation\_time = 10-APR-2000 13:41:12  
Revision\_time = 30-JAN-2020 03:57:01  
Current\_time = 30-JAN-2020 03:57:18

Content = single\_pulse\_decouple  
Data\_format = 1D\_COMPLEX  
Dim\_size = 26214  
Dim\_title = 13C  
Dim\_units = [ppm]  
Dimensions = X  
Site = ECA500  
Spectrometer = DELTA2\_NMR

Field\_strength = 11.7473579[T] (500[MH  
X\_acq\_duration = 0.83361792[s]  
X\_domain = 13C  
X\_freq = 125.76529768[MHz]  
X\_offset = 100[ppm]  
X\_points = 32768  
X\_prescans = 4  
X\_resolution = 1.19959034[Hz]  
X\_sweep = 39.3081761[kHz]  
Irr\_domain = 1H  
Irr\_freq = 500.15991521[MHz]  
Irr\_offset = 5.0[ppm]  
Clipped = FALSE  
Mod\_return = 1  
Scans = 469  
Total\_scans = 469

X\_90\_width = 12.8[us]  
X\_acq\_time = 0.83361792[s]  
X\_angle = 30[deg]  
X\_atn = 5.3[dB]  
X\_pulse = 4.26666667[us]  
Irr\_atn\_dec = 21.09[dB]  
Irr\_atn\_noe = 21.09[dB]  
Irr\_noise = WALTZ  
Decoupling = TRUE  
Initial\_wait = 1[s]  
Noe = TRUE  
Noe\_time = 2[s]  
Recvr\_gain = 56  
Relaxation\_delay = 2[s]  
Repetition\_time = 2.83361792[s]  
Temp\_get = 23.6[dc]

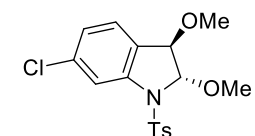

3j

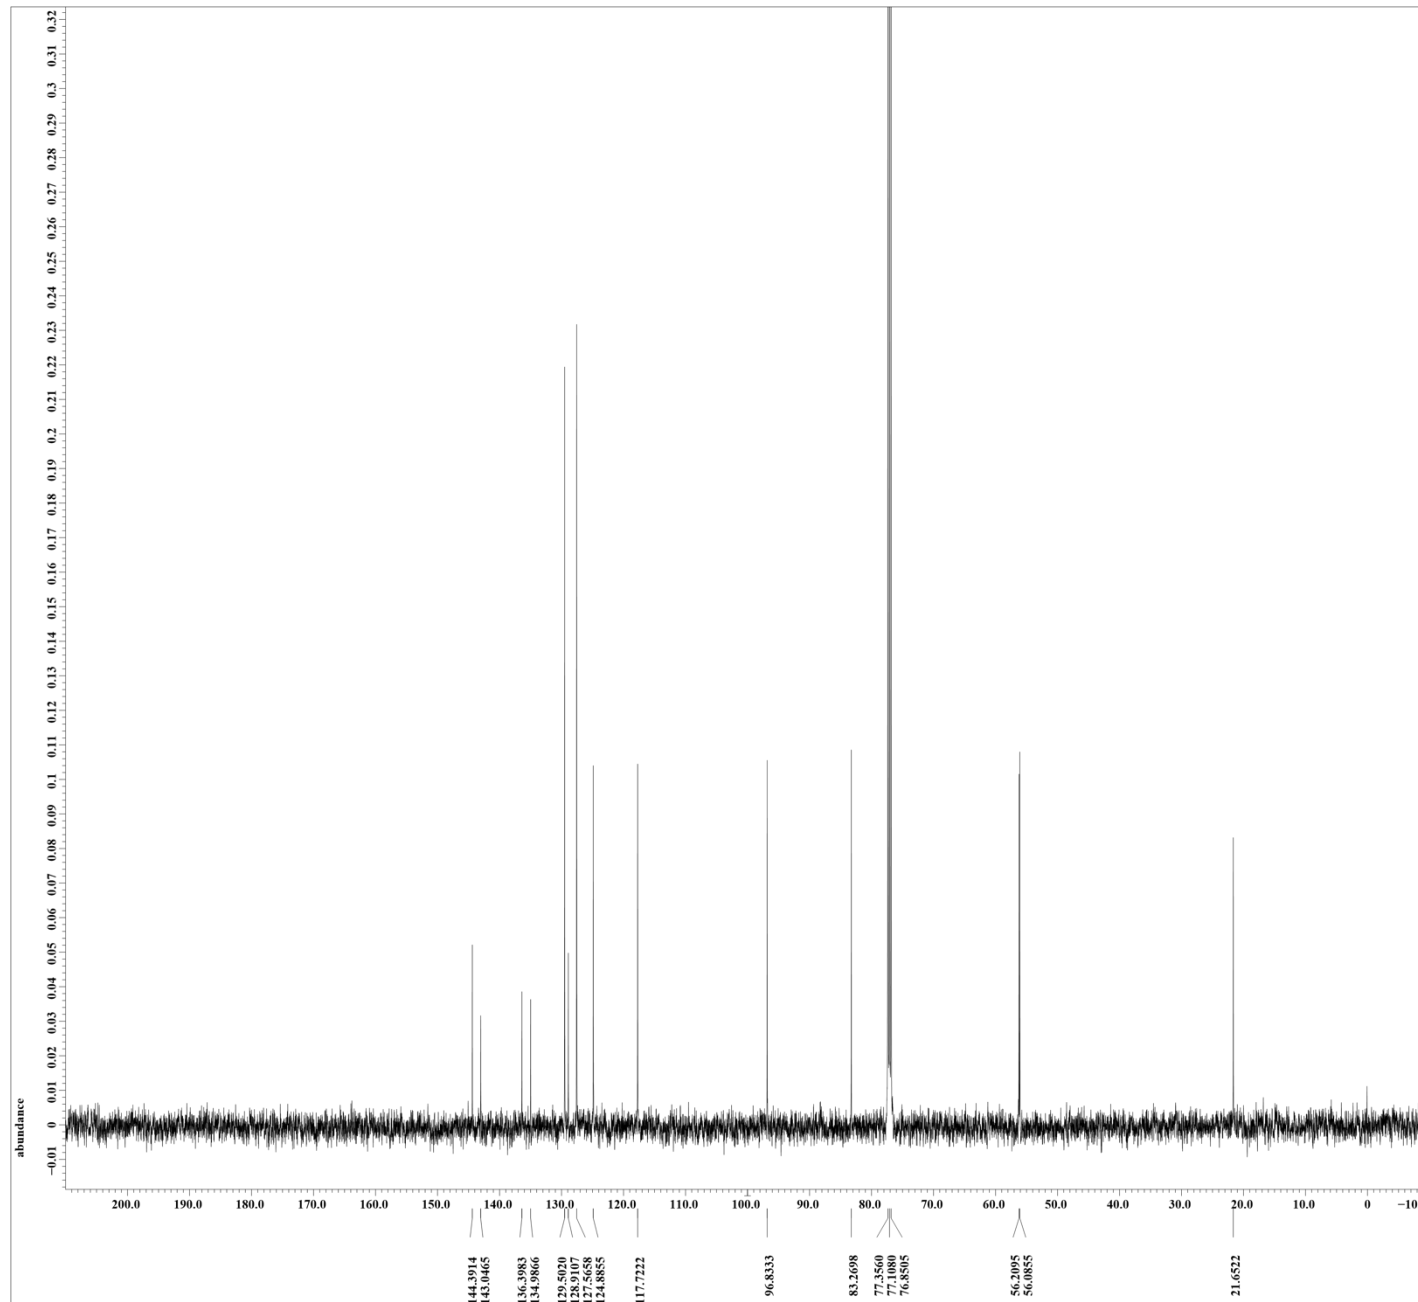

X : parts per Million : 13C





```

Filename      = 7A191231-14.jdf
Author       = delta
Experiment   = single_pulse.ex2
Sample_id    = S8578338
Solvent      = CHLOROFORM-D
Creation_time = 31-DEC-2019 15:15:05
Revision_time = 1-FEB-2020 18:14:11
Current_Time = 1-FEB-2020 18:14:34

Content      = single_pulse
Data format  = 1D COMPLEX
Dim_size     = 13107
Dim_title    = 1H
Dim_units    = [ppm]
Dimensions   = X
Site         = ECA 500
Spectrometer = DELTA2_NMR

Field_strength = 11.62926421 [T] (500[M]
X_acq_duration = 1.76422912 [s]
X_domain       = 1H
X_freq         = 495.13191398 [MHz]
X_offset       = 5 [ppm]
X_points       = 16384
X_prescans     = 1
X_resolution   = 0.5668198 [Hz]
X_sweep        = 9.28677563 [kHz]
Irr_domain     = 1H
Irr_freq       = 495.13191398 [MHz]
Irr_offset     = 5 [ppm]
Tri_domain     = 1H
Tri_freq       = 495.13191398 [MHz]
Tri_offset     = 5 [ppm]
Clipped        = FALSE
Mod_return     = 1
Scans          = 8
Total_scans    = 8

X_90_width     = 11.3 [us]
X_acq_time     = 1.76422912 [s]
X_angle        = 45 [deg]
X_atn          = 3.3 [dB]
X_pulse        = 5.65 [us]
Irr_mode       = Off
Tri_mode       = Off
Dante_presat   = FALSE
Initial_wait    = 1 [s]
Recov_gain     = 50
Relaxation_delay = 5 [s]
Repetition_time = 6.76422912 [s]
Temp_get       = 23 [dC]
  
```

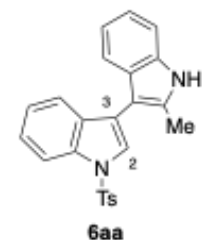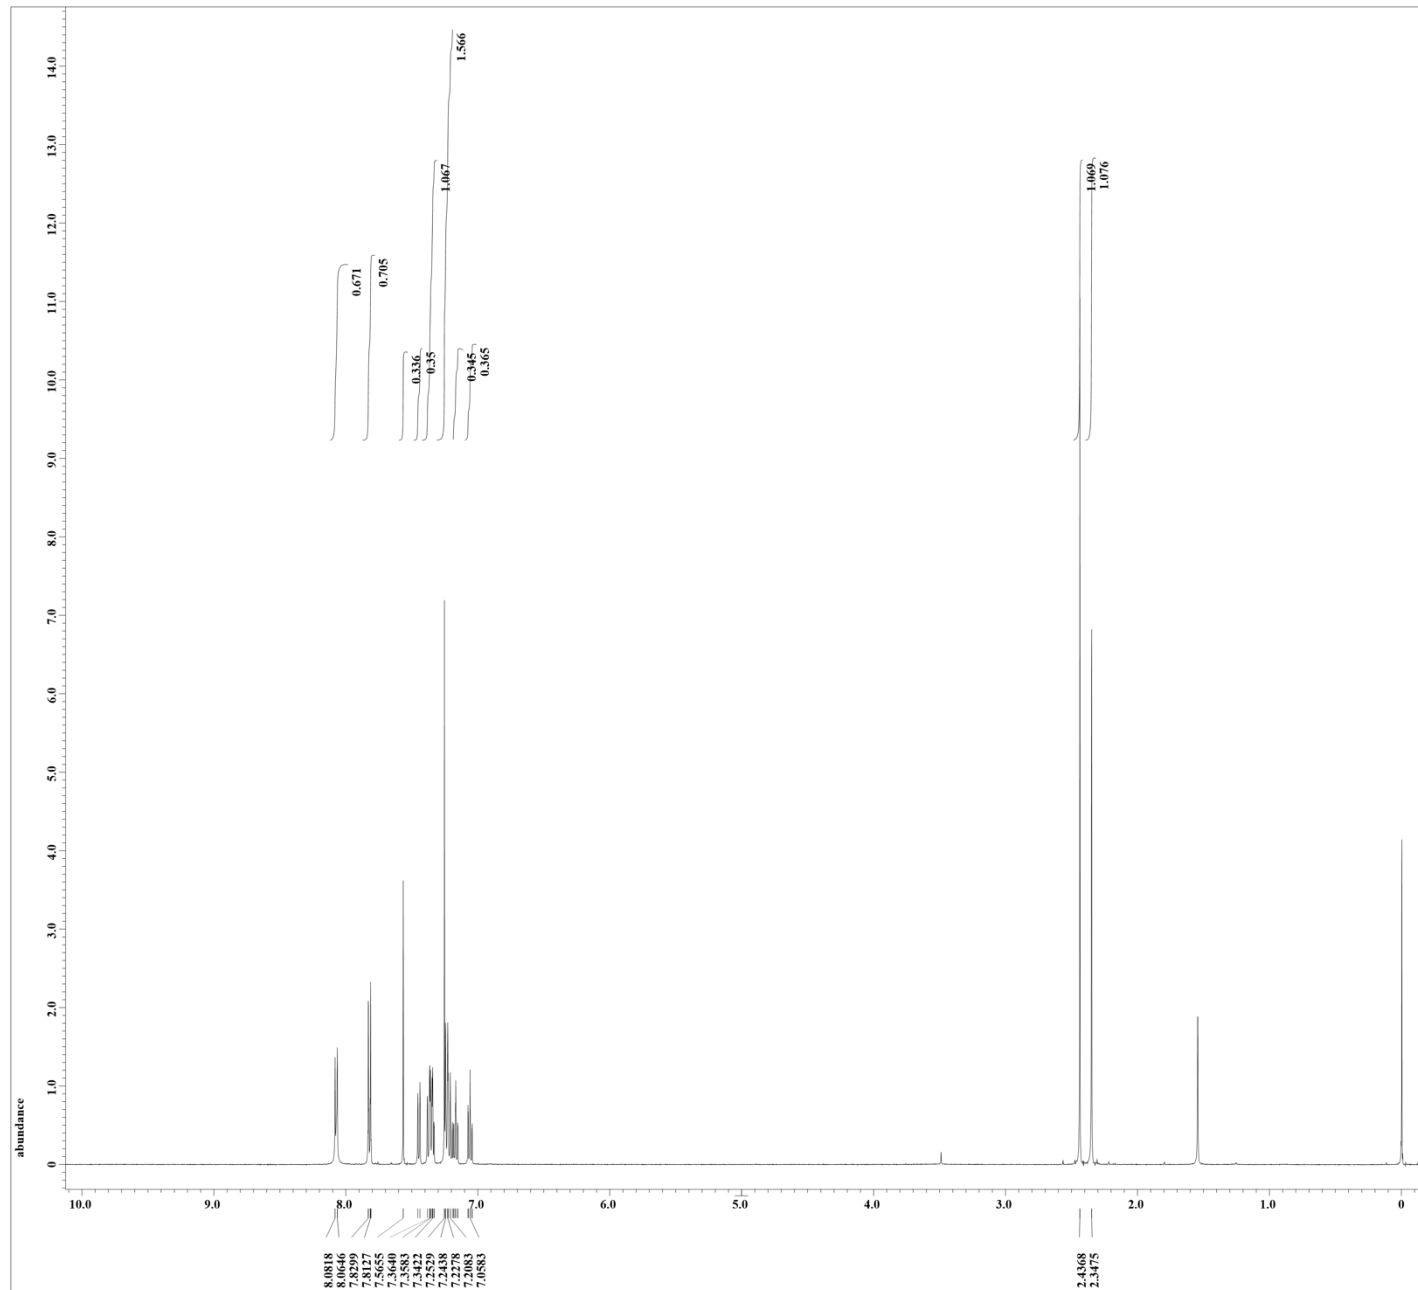

X : parts per Million : 1H



Filename = 7A191231-12.jdf  
 Author = delta  
 Experiment = single\_pulse\_dec  
 Sample\_id = S8648086  
 Solvent = CHLOROFORM-D  
 Creation\_time = 1-JAN-2020 12:35:19  
 Revision\_time = 1-FEB-2020 18:15:45  
 Current\_Time = 1-FEB-2020 18:16:13

Content = single pulse decouple  
 Data format = 1D COMPLEX  
 Dim\_size = 26214  
 Dim\_title = 13C  
 Dim\_units = [ppm]  
 Dimensions = X  
 Site = ECA 500  
 Spectrometer = DELTA2\_NMR

Field\_strength = 11.62926421[T] (500[M]  
 X\_acq\_duration = 0.8388608[s]  
 X\_domain = 13C  
 X\_freq = 124.5010059[MHz]  
 X\_offset = 100[ppm]  
 X\_points = 32768  
 X\_prescans = 4  
 X\_resolution = 1.1920929[Hz]  
 X\_sweep = 39.0625[kHz]  
 Irr\_domain = 1H  
 Irr\_freq = 495.13191398[MHz]  
 Irr\_offset = 5[ppm]  
 Clipped = TRUE  
 Mod\_return = 1  
 Scans = 24613  
 Total\_scans = 24613

X\_90\_width = 10.1[us]  
 X\_acq\_time = 0.8388608[s]  
 X\_angle = 30[deg]  
 X\_atn = 9.5[dB]  
 X\_pulse = 3.36666667[us]  
 Irr\_atn\_dec = 21.51[dB]  
 Irr\_atn\_noe = 21.51[dB]  
 Irr\_noise = WALTZ  
 Decoupling = TRUE  
 Initial\_wait = 1[s]  
 Noe = TRUE  
 Noe\_time = 2[s]  
 Recv\_gain = 60  
 Relaxation\_delay = 2[s]  
 Repetition\_time = 2.8388608[s]  
 Temp\_get = 23.9[dc]

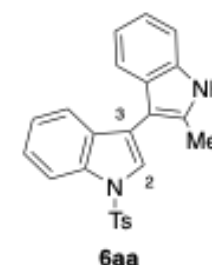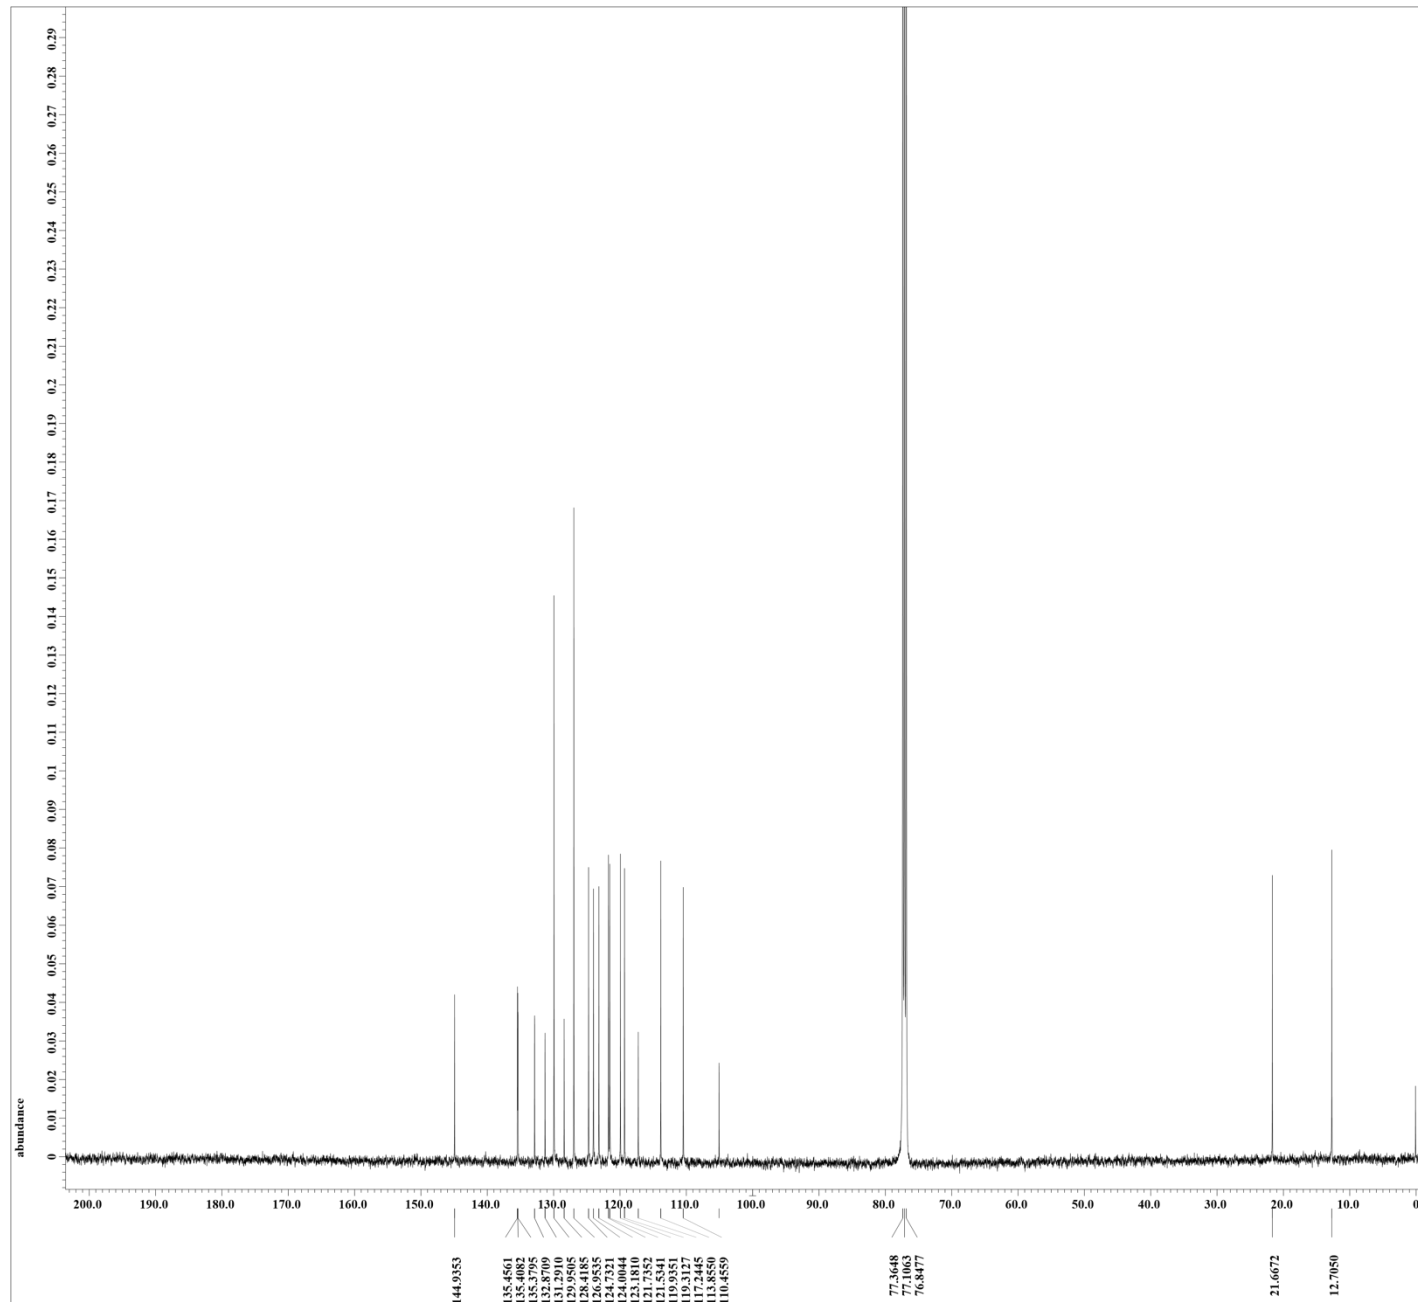

X : parts per Million : 13C



Filename = SH004-1102-5.jdf  
 Author = delta  
 Experiment = single\_pulse.ex2  
 Sample\_id = S#467375  
 Solvent = CHLOROFORM-D  
 Creation\_time = 30-JAN-2020 12:05:25  
 Revision\_time = 30-JAN-2020 17:32:57  
 Current\_time = 30-JAN-2020 17:33:18

Content = single\_pulse  
 Data\_format = 1D COMPLEX  
 Dim\_size = 13107  
 Dim\_title = 1H  
 Dim\_units = [ppm]  
 Dimensions = X  
 Site = ECA 500  
 Spectrometer = DELTA2\_NMR

Field\_strength = 11.62926421 [T] (500[M]  
 X\_acq\_duration = 1.76422912 [s]  
 X\_domain = 1H  
 X\_freq = 495.13191398 [MHz]  
 X\_offset = 5 [ppm]  
 X\_points = 16384  
 X\_prescans = 1  
 X\_resolution = 0.5668198 [Hz]  
 X\_sweep = 9.28677563 [kHz]  
 Irr\_domain = 1H  
 Irr\_freq = 495.13191398 [MHz]  
 Irr\_offset = 5 [ppm]  
 Tri\_domain = 1H  
 Tri\_freq = 495.13191398 [MHz]  
 Tri\_offset = 5 [ppm]  
 Clipped = FALSE  
 Mod\_return = 1  
 Scans = 8  
 Total\_scans = 8

X\_90\_width = 11.3 [us]  
 X\_acq\_time = 1.76422912 [s]  
 X\_angle = 45 [deg]  
 X\_atn = 3.3 [dB]  
 X\_pulse = 5.65 [us]  
 Irr\_mode = Off  
 Tri\_mode = Off  
 Dante\_presat = FALSE  
 Initial\_wait = 1 [s]  
 Recvz\_gain = 50  
 Relaxation\_delay = 5 [s]  
 Repetition\_time = 6.76422912 [s]  
 Temp\_get = 23.6 [dC]

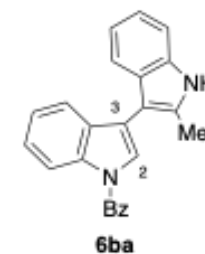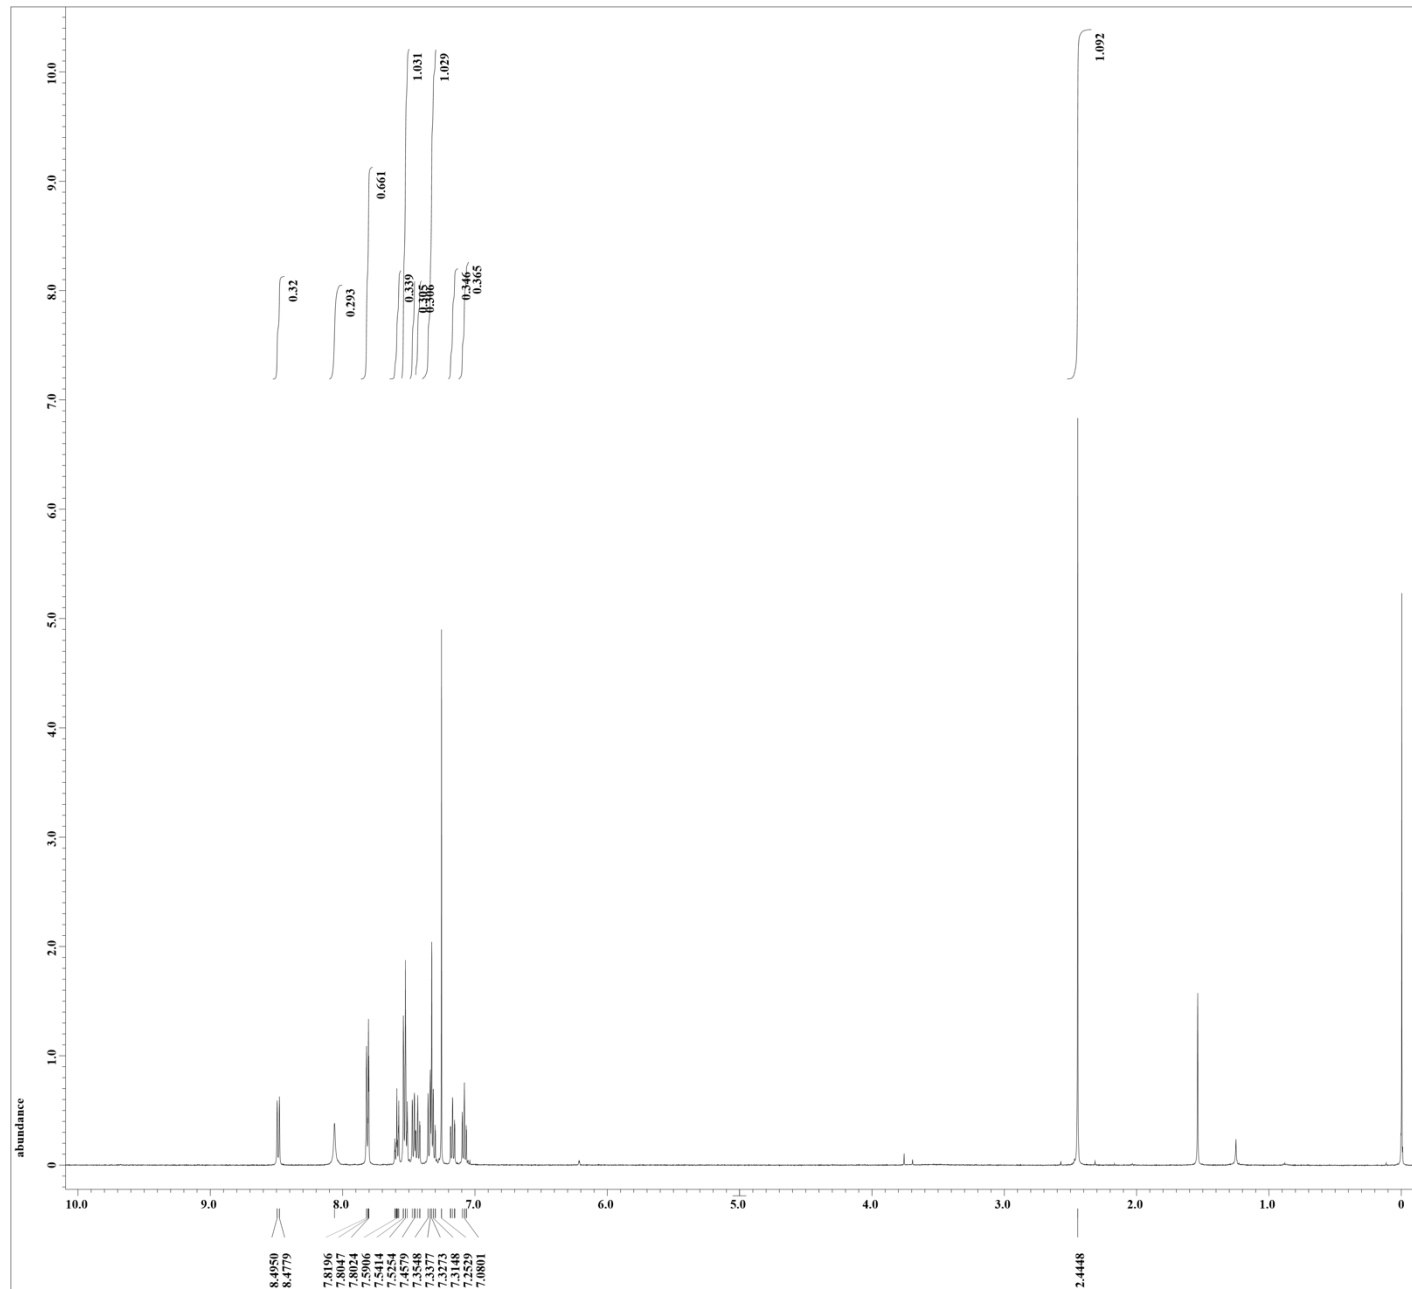

X : parts per Million : 1H



Filename = SH004-1102-3.jdf  
 Author = delta  
 Experiment = single\_pulse\_dec  
 Sample\_id = S8530593  
 Solvent = CHLOROFORM-D  
 Creation\_time = 30-JAN-2020 15:13:55  
 Revision\_time = 30-JAN-2020 16:09:33  
 Current\_time = 30-JAN-2020 16:12:13

Content = single\_pulse\_decouple  
 Data\_format = 1D\_COMPLEX  
 Dim\_size = 26214  
 Dim\_title = 13C  
 Dim\_units = [ppm]  
 Dimensions = X  
 Site = ECA 500  
 Spectrometer = DELTA2\_NMR

Field\_strength = 11.62926421[T] (500[M]  
 X\_acq\_duration = 0.8388608[s]  
 X\_domain = 13C  
 X\_freq = 124.5010059[MHz]  
 X\_offset = 100[ppm]  
 X\_points = 32768  
 X\_prescans = 4  
 X\_resolution = 1.1920929[Hz]  
 X\_sweep = 39.0625[kHz]  
 Irr\_domain = 1H  
 Irr\_freq = 495.13191398[MHz]  
 Irr\_offset = 5[ppm]  
 Clipped = FALSE  
 Mod\_return = 1  
 Scans = 1766  
 Total\_scans = 1766

X\_90\_width = 10.1[us]  
 X\_acq\_time = 0.8388608[s]  
 X\_angle = 30[deg]  
 X\_atn = 9.5[dB]  
 X\_pulse = 3.36666667[us]  
 Irr\_atn\_dec = 21.51[dB]  
 Irr\_atn\_noe = 21.51[dB]  
 Irr\_noise = WALZ  
 Decoupling = TRUE  
 Initial\_wait = 1[s]  
 Noe = TRUE  
 Noe\_time = 2[s]  
 Recv\_gain = 60  
 Relaxation\_delay = 2[s]  
 Repetition\_time = 2.8388608[s]  
 Temp\_get = 24.4[dc]

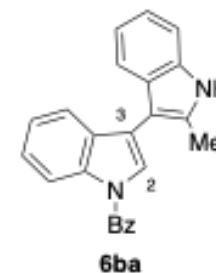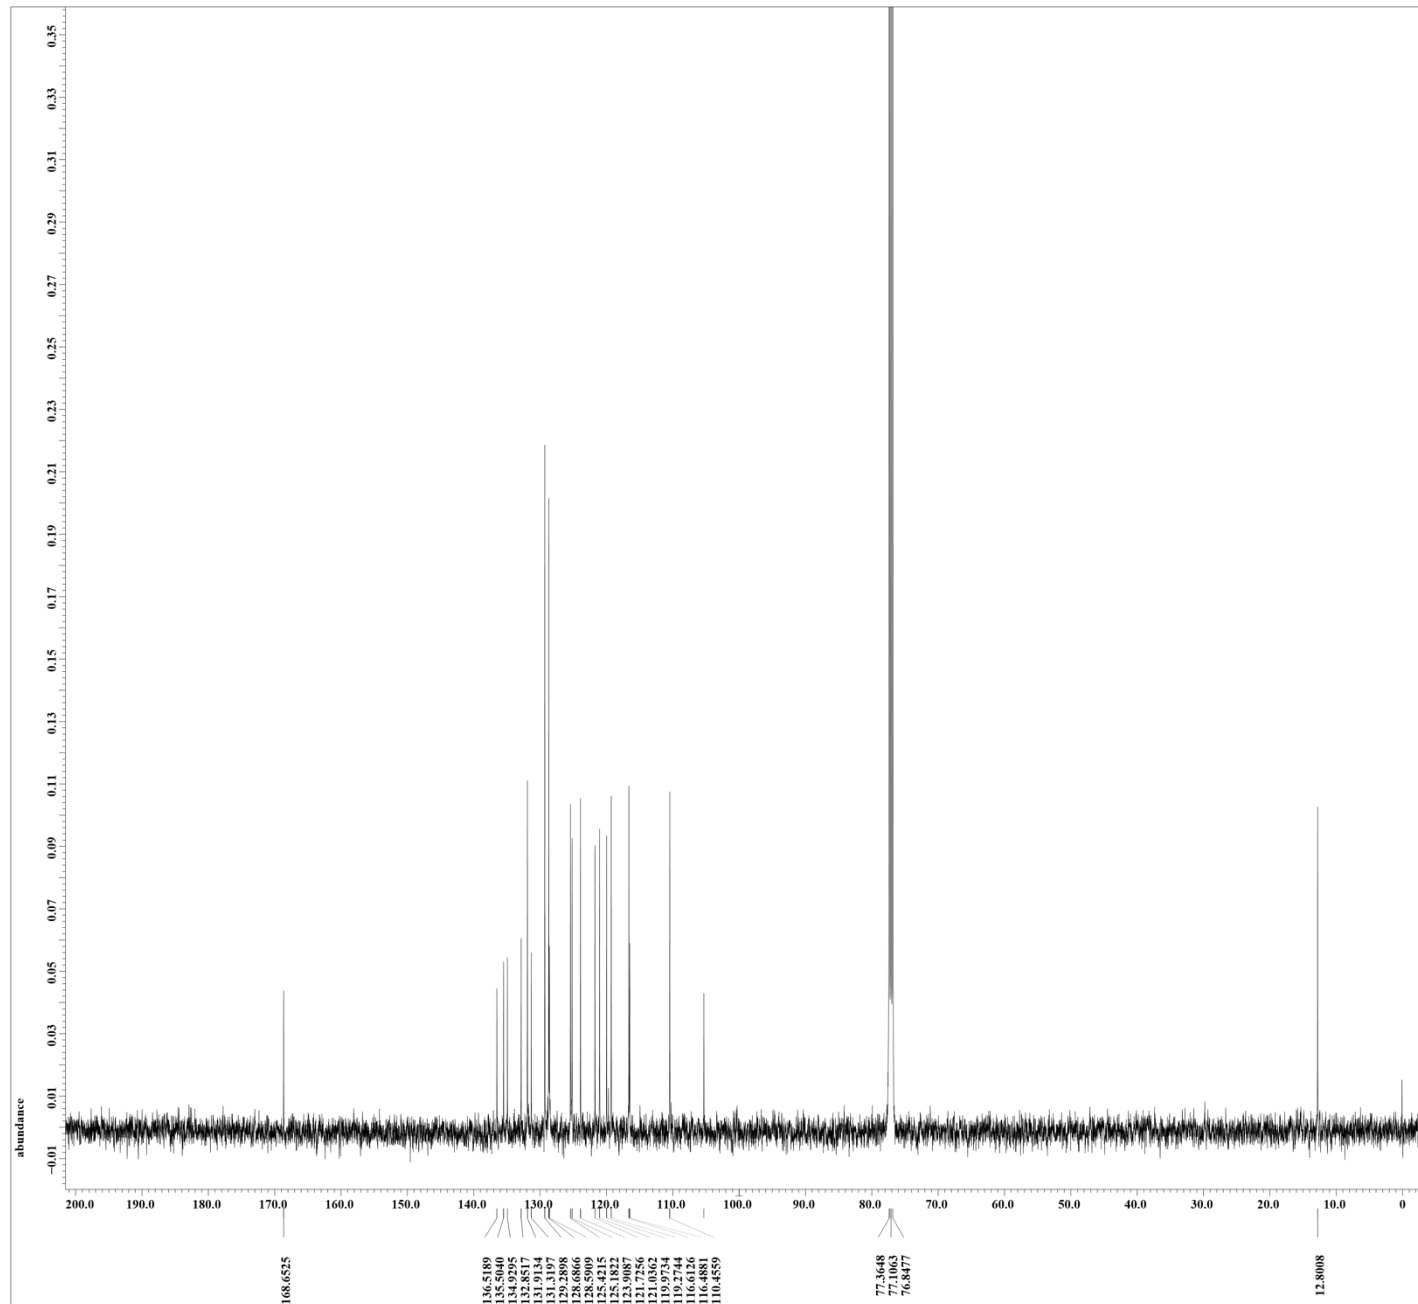



Filename = 7A200129-5.jdf  
 Author = delta  
 Experiment = single\_pulse.ex2  
 Sample\_id = S#633593  
 Solvent = CHLOROFORM-D  
 Creation\_time = 29-JAN-2020 16:42:32  
 Revision\_time = 29-JAN-2020 17:39:43  
 Current\_time = 29-JAN-2020 17:40:30

Content = single\_pulse  
 Data\_format = 1D\_COMPLEX  
 Dim\_size = 13107  
 Dim\_title = 1H  
 Dim\_units = [ppm]  
 Dimensions = X  
 Site = ECA 500  
 Spectrometer = DELTA2\_NMR

Field\_strength = 11.62926421 [T] (500[M]  
 X\_acq\_duration = 1.76422912 [s]  
 X\_domain = 1H  
 X\_freq = 495.13191398 [MHz]  
 X\_offset = 5 [ppm]  
 X\_points = 16384  
 X\_prescans = 1  
 X\_resolution = 0.5668198 [Hz]  
 X\_sweep = 9.28677563 [kHz]  
 Irr\_domain = 1H  
 Irr\_freq = 495.13191398 [MHz]  
 Irr\_offset = 5 [ppm]  
 Tri\_domain = 1H  
 Tri\_freq = 495.13191398 [MHz]  
 Tri\_offset = 5 [ppm]  
 Clipped = FALSE  
 Mod\_return = 1  
 Scans = 8  
 Total\_scans = 8

X\_90\_width = 11.3 [us]  
 X\_acq\_time = 1.76422912 [s]  
 X\_angle = 45 [deg]  
 X\_atn = 3.3 [dB]  
 X\_pulse = 5.65 [us]  
 Irr\_mode = Off  
 Tri\_mode = Off  
 Dante\_presat = FALSE  
 Initial\_wait = 1 [s]  
 Recv\_gain = 50  
 Relaxation\_delay = 5 [s]  
 Repetition\_time = 6.76422912 [s]  
 Temp\_get = 23.7 [dC]

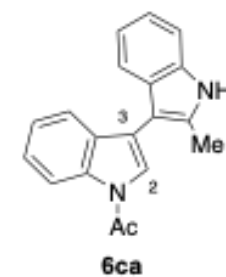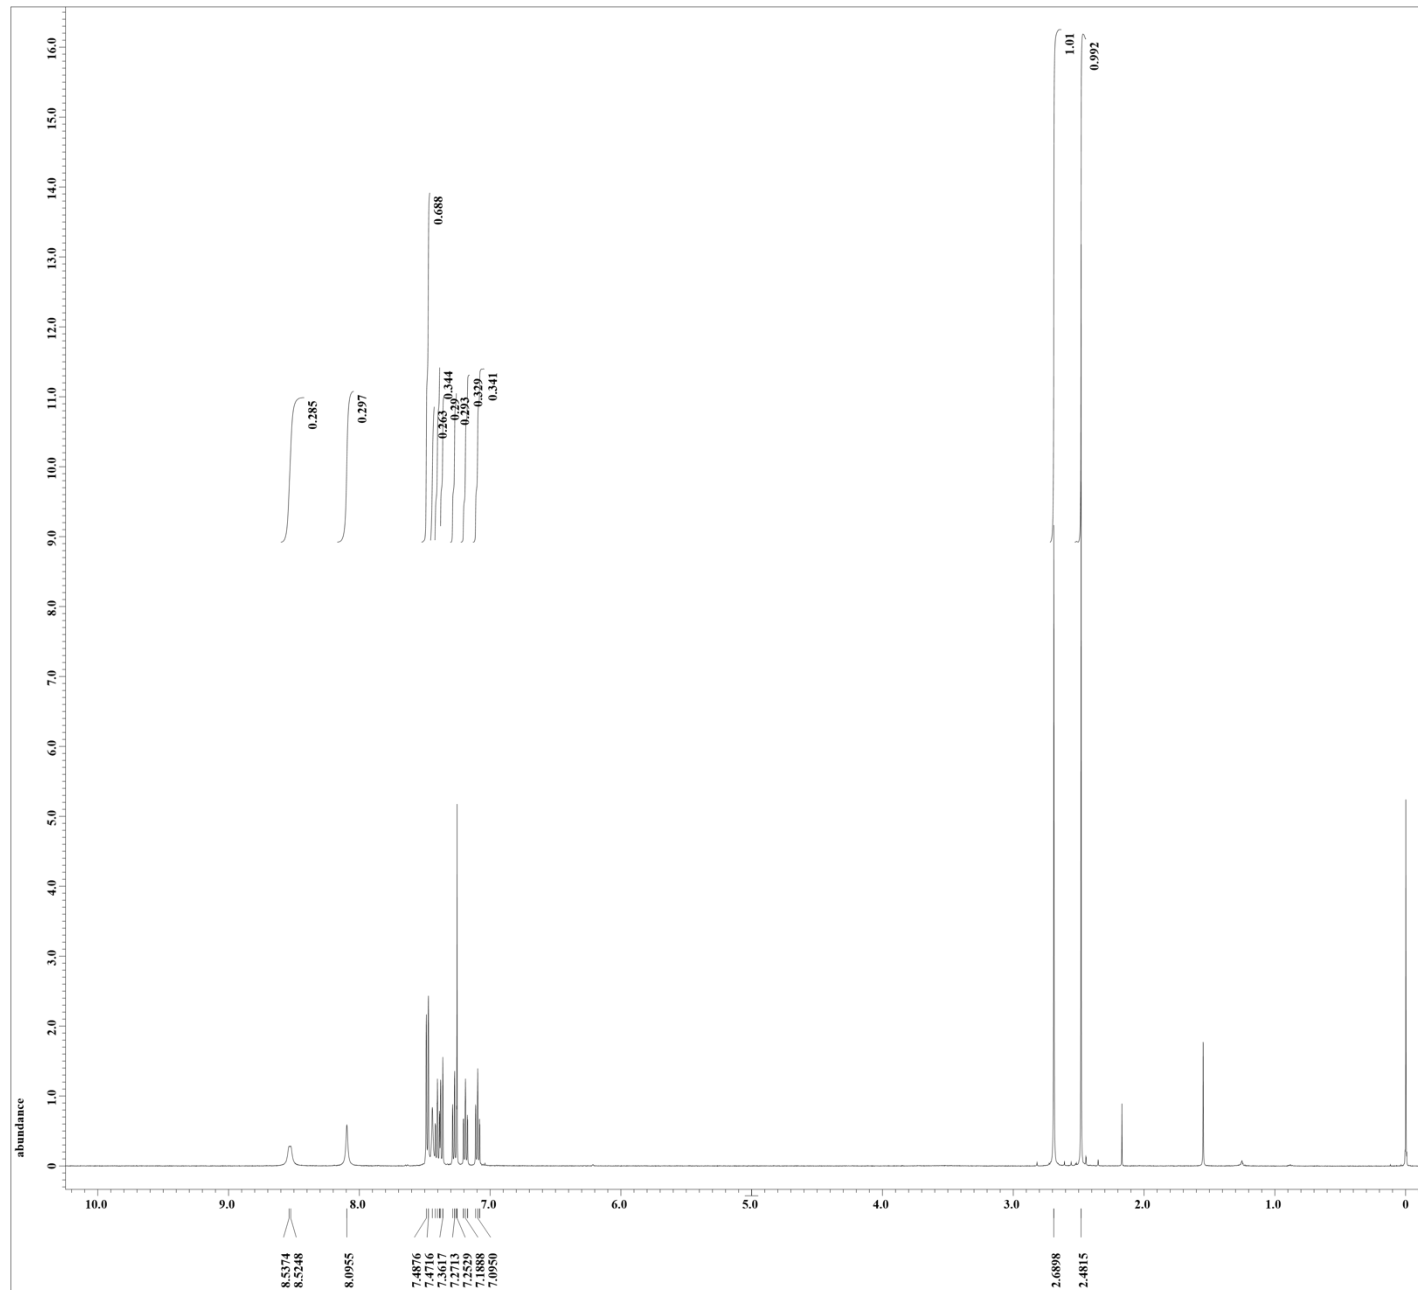

X : parts per Million : 1H



Filename = 7A200129-5.jdf  
 Author = delta  
 Experiment = single\_pulse\_dec  
 Sample\_id = S#634679  
 Solvent = CHLOROFORM-D  
 Creation\_time = 30-JAN-2020 07:12:30  
 Revision\_time = 30-JAN-2020 08:08:24  
 Current\_time = 30-JAN-2020 08:10:29

Content = single\_pulse\_decouple  
 Data\_format = 1D\_COMPLEX  
 Dim\_size = 26214  
 Dim\_title = 13C  
 Dim\_units = [ppm]  
 Dimensions = X  
 Site = ECA 500  
 Spectrometer = DELTA2\_NMR

Field\_strength = 11.62926421[T] (500[M]  
 X\_acq\_duration = 0.8388608[s]  
 X\_domain = 13C  
 X\_freq = 124.5010059[MHz]  
 X\_offset = 100[ppm]  
 X\_points = 32768  
 X\_prescans = 4  
 X\_resolution = 1.1920929[Hz]  
 X\_sweep = 39.0625[kHz]  
 Irr\_domain = 1H  
 Irr\_freq = 495.13191398[MHz]  
 Irr\_offset = 5[ppm]  
 Clipped = FALSE  
 Mod\_return = 1  
 Scans = 18357  
 Total\_scans = 18357

X\_90\_width = 10.1[us]  
 X\_acq\_time = 0.8388608[s]  
 X\_angle = 30[deg]  
 X\_atn = 9.5[dB]  
 X\_pulse = 3.36666667[us]  
 Irr\_atn\_dec = 21.51[dB]  
 Irr\_atn\_noe = 21.51[dB]  
 Irr\_noise = WALTZ  
 Decoupling = TRUE  
 Initial\_wait = 1[s]  
 Noe = TRUE  
 Noe\_time = 2[s]  
 Recvr\_gain = 60  
 Relaxation\_delay = 2[s]  
 Repetition\_time = 2.8388608[s]  
 Temp\_get = 24.1[dc]

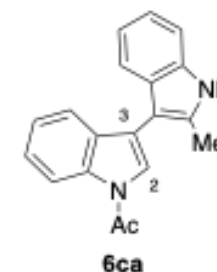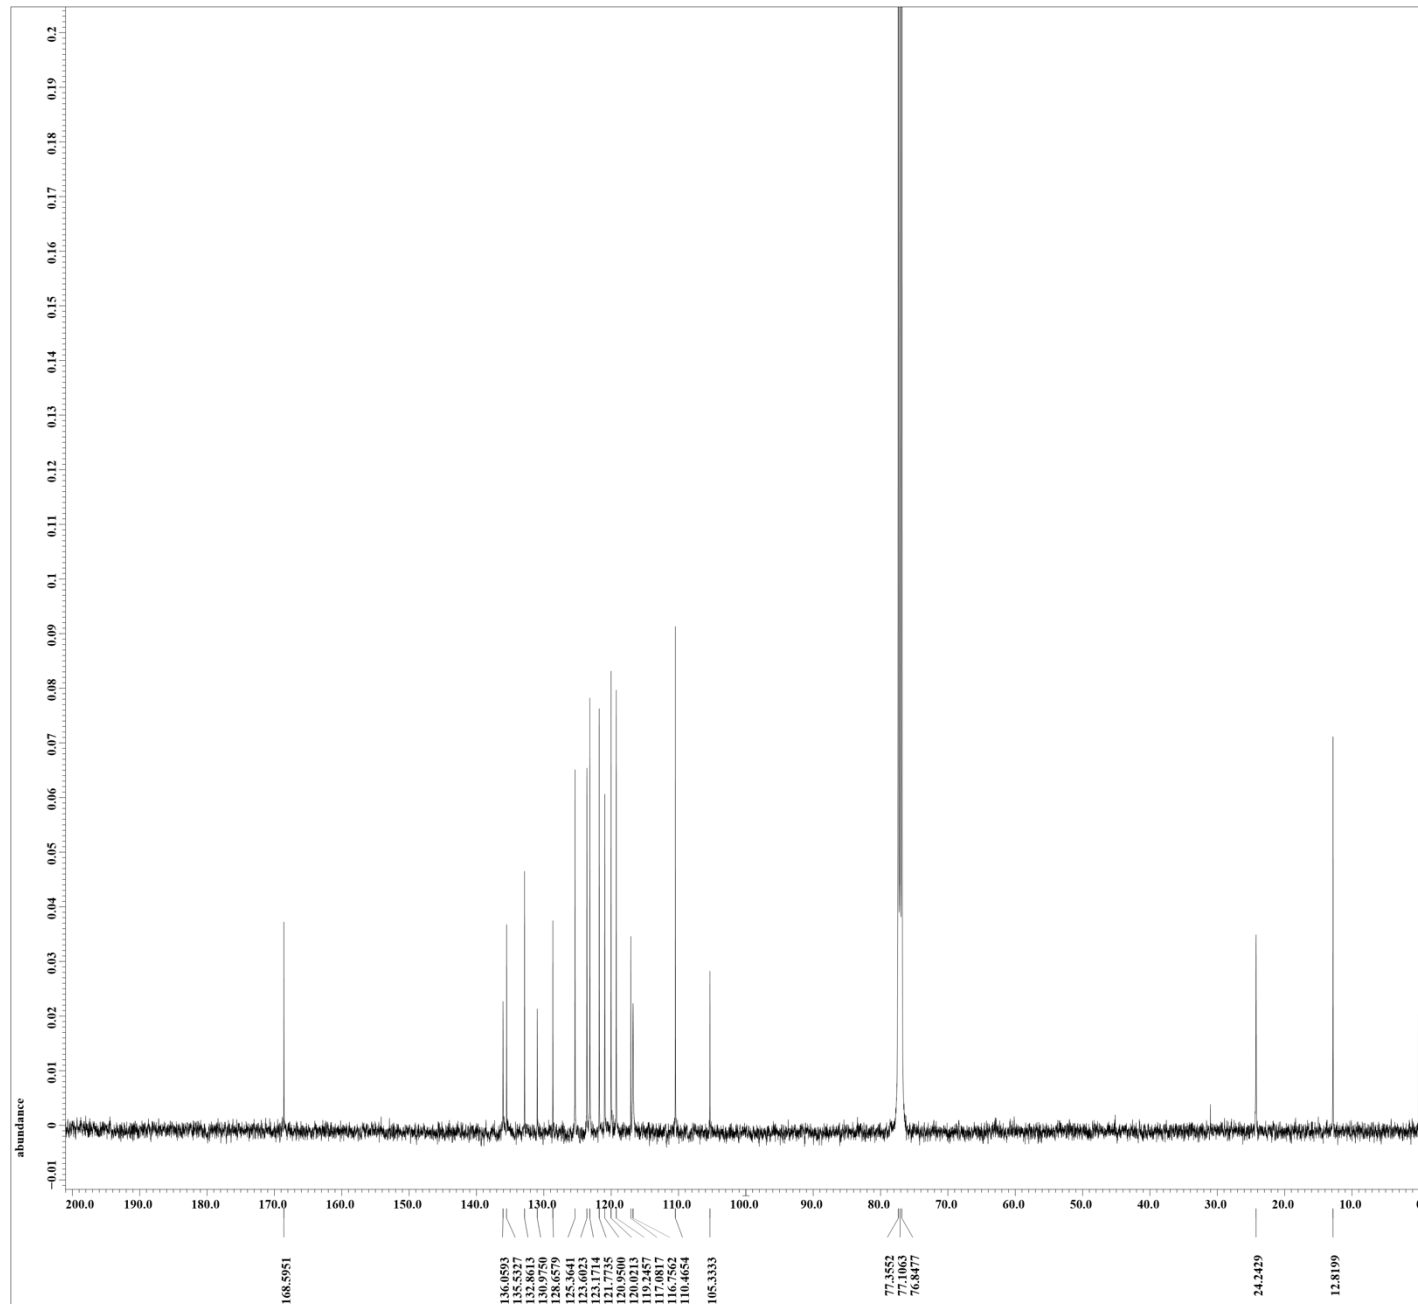



Filename = 7A200128-7.jdf  
 Author = delta  
 Experiment = single\_pulse.ex2  
 Sample\_id = S8741162  
 Solvent = CHLOROFORM-D  
 Creation\_time = 28-JAN-2020 19:42:13  
 Revision\_time = 28-JAN-2020 20:40:29  
 Current\_time = 28-JAN-2020 20:41:38

Content = single\_pulse  
 Data\_format = 1D COMPLEX  
 Dim\_size = 13107  
 Dim\_title = 1H  
 Dim\_units = [ppm]  
 Dimensions = X  
 Site = ECA 500  
 Spectrometer = DELTA2\_NMR

Field\_strength = 11.62926421 [T] (500[M]  
 X\_acq\_duration = 1.76422912 [s]  
 X\_domain = 1H  
 X\_freq = 495.13191398 [MHz]  
 X\_offset = 5 [ppm]  
 X\_points = 16384  
 X\_prescans = 1  
 X\_resolution = 0.5668198 [Hz]  
 X\_sweep = 9.28677563 [kHz]  
 Irr\_domain = 1H  
 Irr\_freq = 495.13191398 [MHz]  
 Irr\_offset = 5 [ppm]  
 Tri\_domain = 1H  
 Tri\_freq = 495.13191398 [MHz]  
 Tri\_offset = 5 [ppm]  
 Clipped = FALSE  
 Mod\_return = 1  
 Scans = 8  
 Total\_scans = 8

X\_90\_width = 11.3 [us]  
 X\_acq\_time = 1.76422912 [s]  
 X\_angle = 45 [deg]  
 X\_atn = 3.3 [dB]  
 X\_pulse = 5.65 [us]  
 Irr\_mode = Off  
 Tri\_mode = Off  
 Dante\_presat = FALSE  
 Initial\_wait = 1 [s]  
 Recv\_gain = 48  
 Relaxation\_delay = 5 [s]  
 Repetition\_time = 6.76422912 [s]  
 Temp\_get = 23.5 [dC]

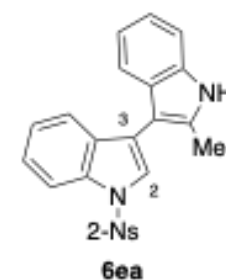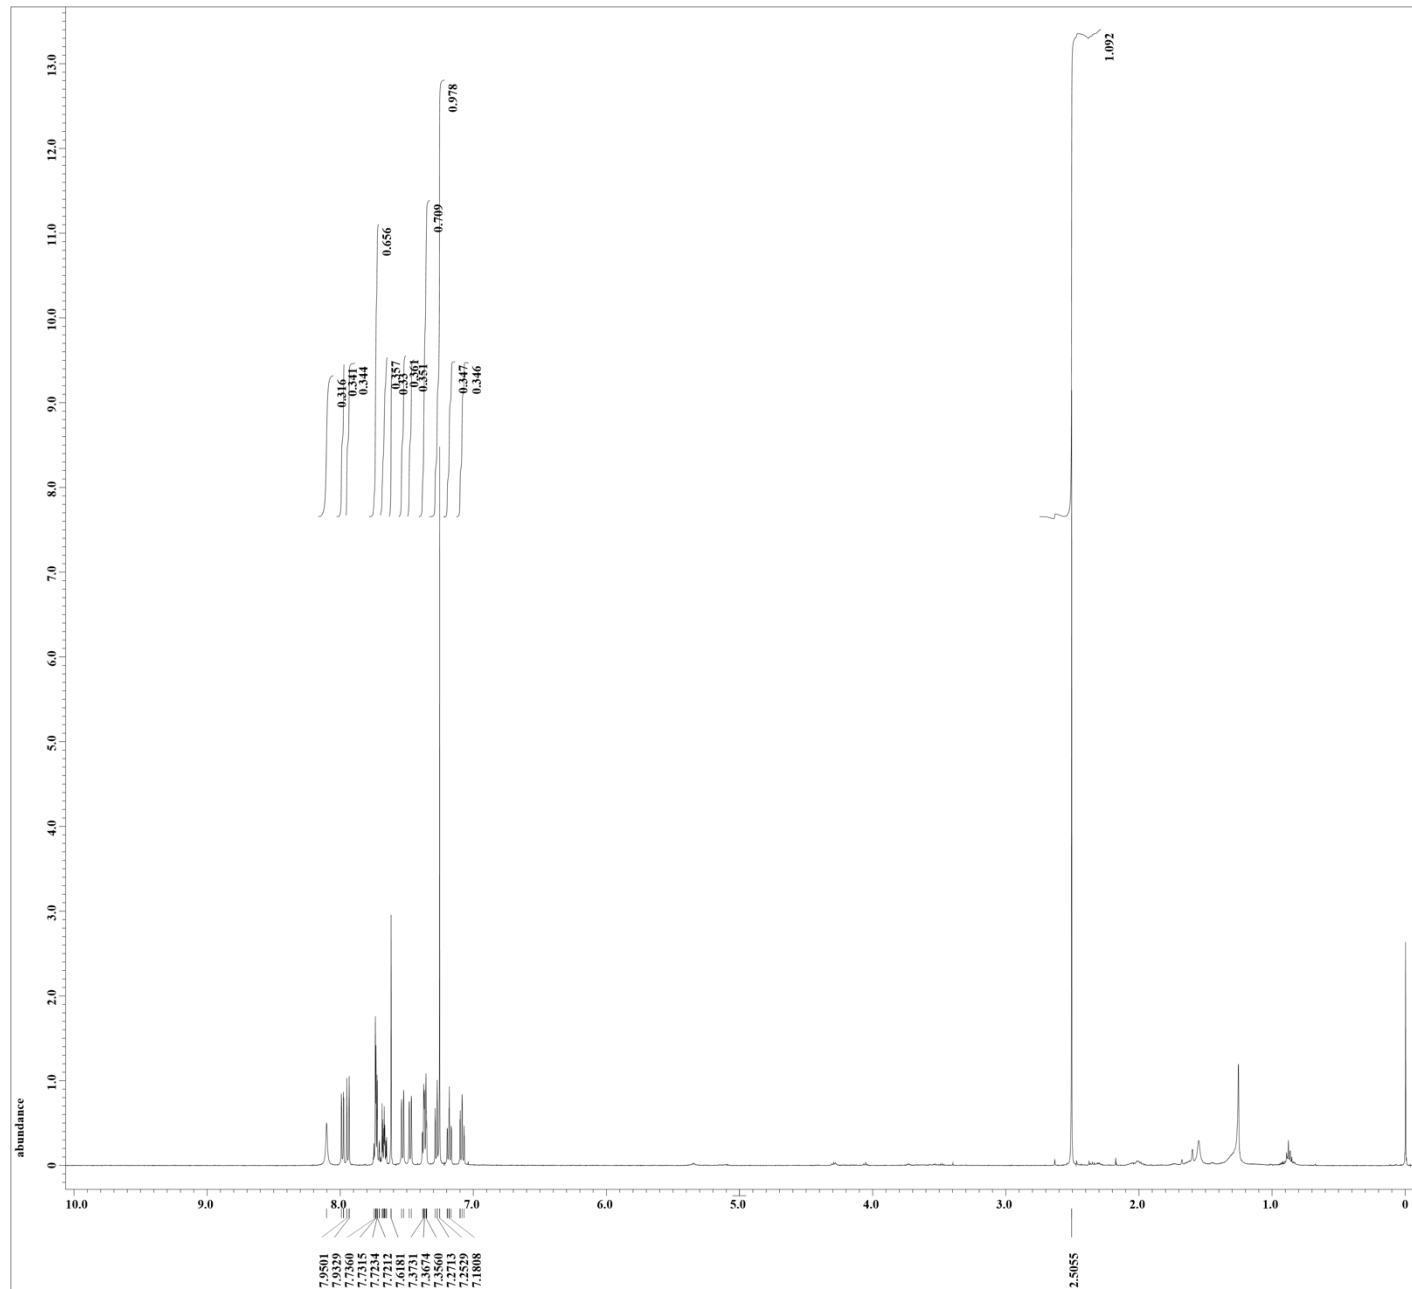

X : parts per Million : 1H



Filename = 7A200128-7.jdf  
 Author = delta  
 Experiment = single\_pulse\_dec  
 Sample\_id = S8742447  
 Solvent = CHLOROFORM-D  
 Creation\_time = 29-JAN-2020 07:19:37  
 Revision\_time = 29-JAN-2020 08:14:58  
 Current\_time = 29-JAN-2020 08:18:01

Content = single pulse decouple  
 Data format = 1D COMPLEX  
 Dim\_size = 26214  
 Dim\_title = 13C  
 Dim\_units = [ppm]  
 Dimensions = X  
 Site = ECA 500  
 Spectrometer = DELTA2\_NMR

Field\_strength = 11.62926421[T] (500[M]  
 X\_acq\_duration = 0.8388608[s]  
 X\_domain = 13C  
 X\_freq = 124.5010059[MHz]  
 X\_offset = 100[ppm]  
 X\_points = 32768  
 X\_prescans = 4  
 X\_resolution = 1.1920929[Hz]  
 X\_sweep = 39.0625[kHz]  
 Irr\_domain = 1H  
 Irr\_freq = 495.13191398[MHz]  
 Irr\_offset = 5[ppm]  
 Clipped = TRUE  
 Mod\_return = 1  
 Scans = 14710  
 Total\_scans = 14710

X\_90\_width = 10.1[us]  
 X\_acq\_time = 0.8388608[s]  
 X\_angle = 30[deg]  
 X\_atn = 9.5[dB]  
 X\_pulse = 3.36666667[us]  
 Irr\_atn\_dec = 21.51[dB]  
 Irr\_atn\_noe = 21.51[dB]  
 Irr\_noise = WALTZ  
 Decoupling = TRUE  
 Initial\_wait = 1[s]  
 Noe = TRUE  
 Noe\_time = 2[s]  
 Recv\_gain = 60  
 Relaxation\_delay = 2[s]  
 Repetition\_time = 2.8388608[s]  
 Temp\_get = 24[dc]

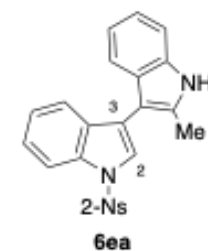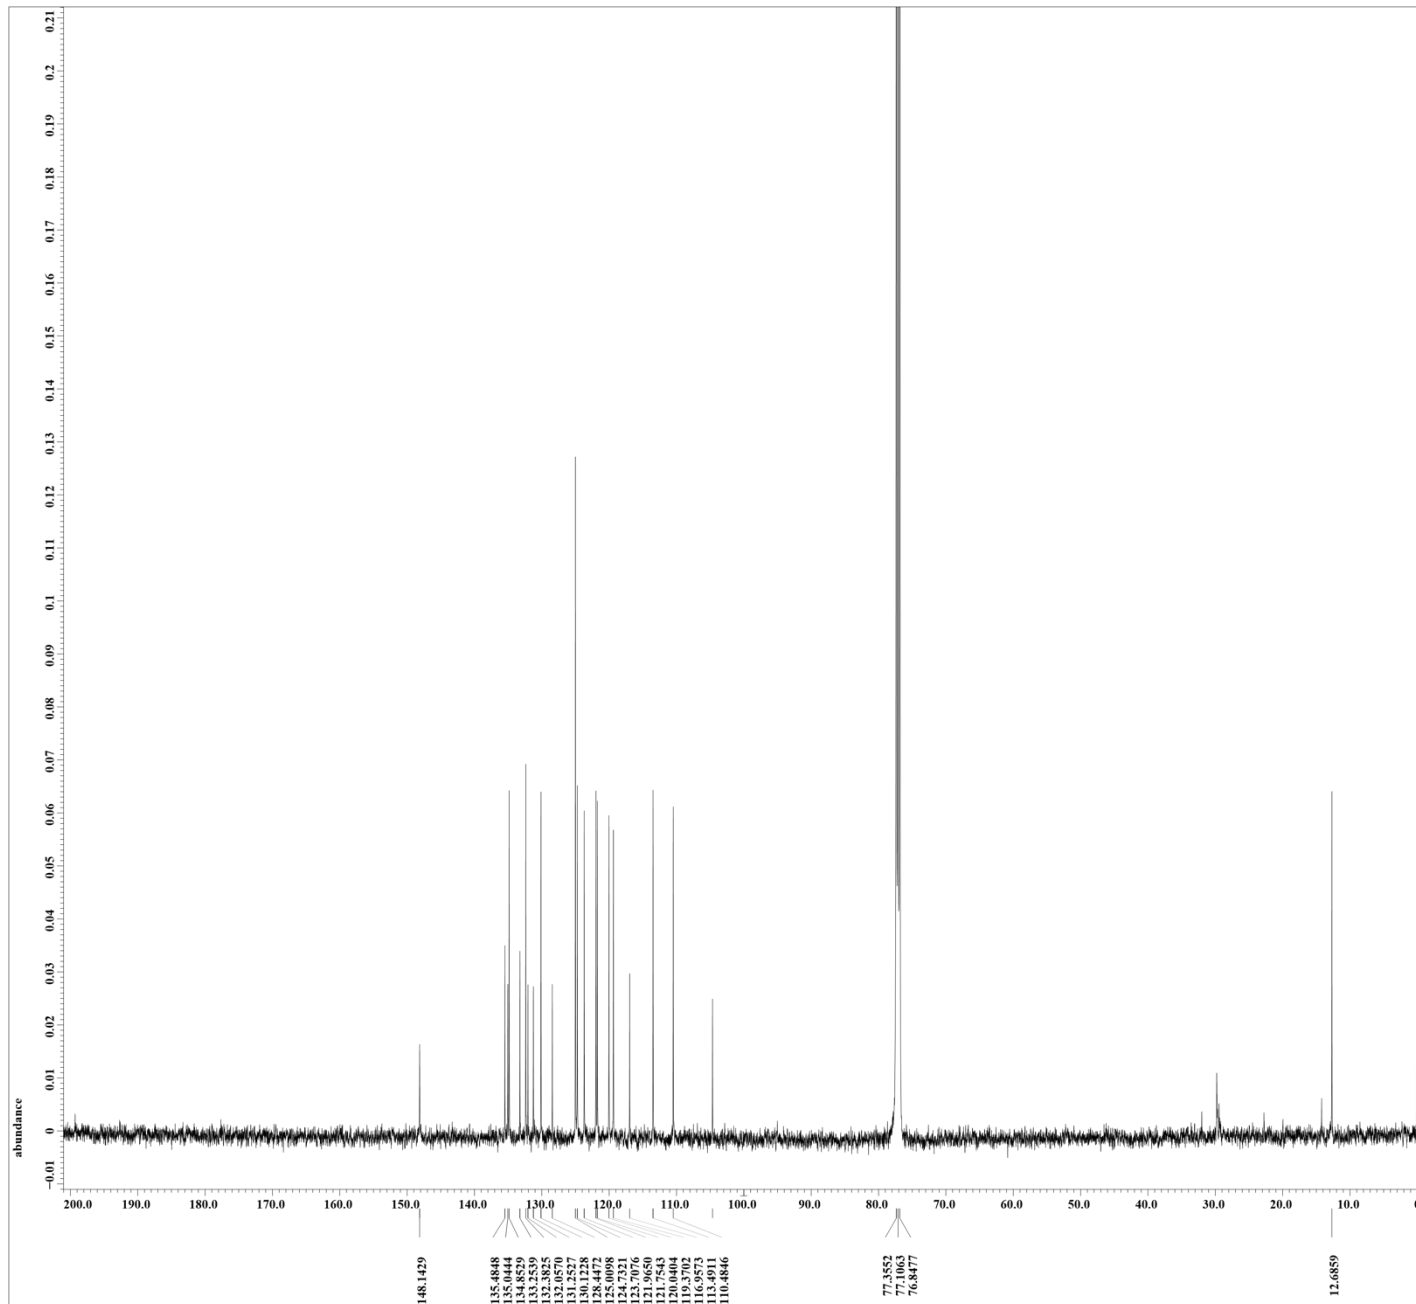

X : parts per Million : 13C





----- PROCESSING PARAMETERS -----  
 dc balance : 0 : FALSE  
 seXp : 0.2[Hz] : 0.0[s]  
 trapezoid3 : 0[%] : 80[%] : 100[%]  
 zeroFill : 1  
 fft : 1 : TRUE : TRUE  
 machinephase  
 ppm  
 Derived from: SH004-0604-1.jdf

Filename = SH004-0604-5.jdf  
 Author = delta  
 Experiment = single\_pulse.ex2  
 Sample\_id = S8751760  
 Solvent = CHLOROFORM-D  
 Creation time = 11-APR-2000 22:41:36  
 Revision time = 2-FEB-2020 11:48:18  
 Current time = 2-FEB-2020 11:48:47  
 Comment = single\_pulse  
 Data format = 1D COMPLEX  
 Dim Time = 13107  
 Dim Title = 1H  
 Dim Units = [ppm]  
 Dimensions = X  
 Site = ECA500  
 Spectrometer = DELTA2 NMR  
 Field strength = 11.7473579[T] (500[MH  
 X\_acq\_duration = 1.74587904[s]  
 X\_domain = 1H  
 X\_freq = 500.15991521[MHz]  
 X\_offset = 5.0[ppm]  
 X\_points = 16384  
 X\_prescans = 1  
 X\_resolution = 0.57277737[Hz]  
 X\_sweep = 9.38438438[kHz]  
 Irr\_domain = 1H  
 Irr\_freq = 500.15991521[MHz]  
 Irr\_offset = 5.0[ppm]  
 Tri\_domain = 1H  
 Tri\_freq = 500.15991521[MHz]  
 Tri\_offset = 5.0[ppm]  
 Clipped = FALSE  
 Mod return = 1  
 Scans = 8  
 Total\_scans = 8  
 X\_90\_width = 12[us]  
 X\_acq time = 1.74587904[s]  
 X\_angle = 45[deg]  
 X\_atn = 3.4[db]  
 X\_pulse = 6[us]  
 Irr\_mode = Off  
 Tri\_mode = Off  
 Dante\_presat = FALSE  
 Initial wait = 1[s]  
 Recvr\_gain = 50  
 Relaxation\_delay = 5[s]  
 Repetition\_time = 6.74587904[s]  
 Temp\_get = 23.6[dc]

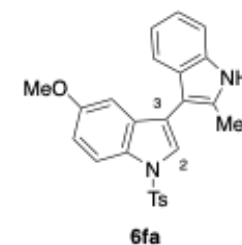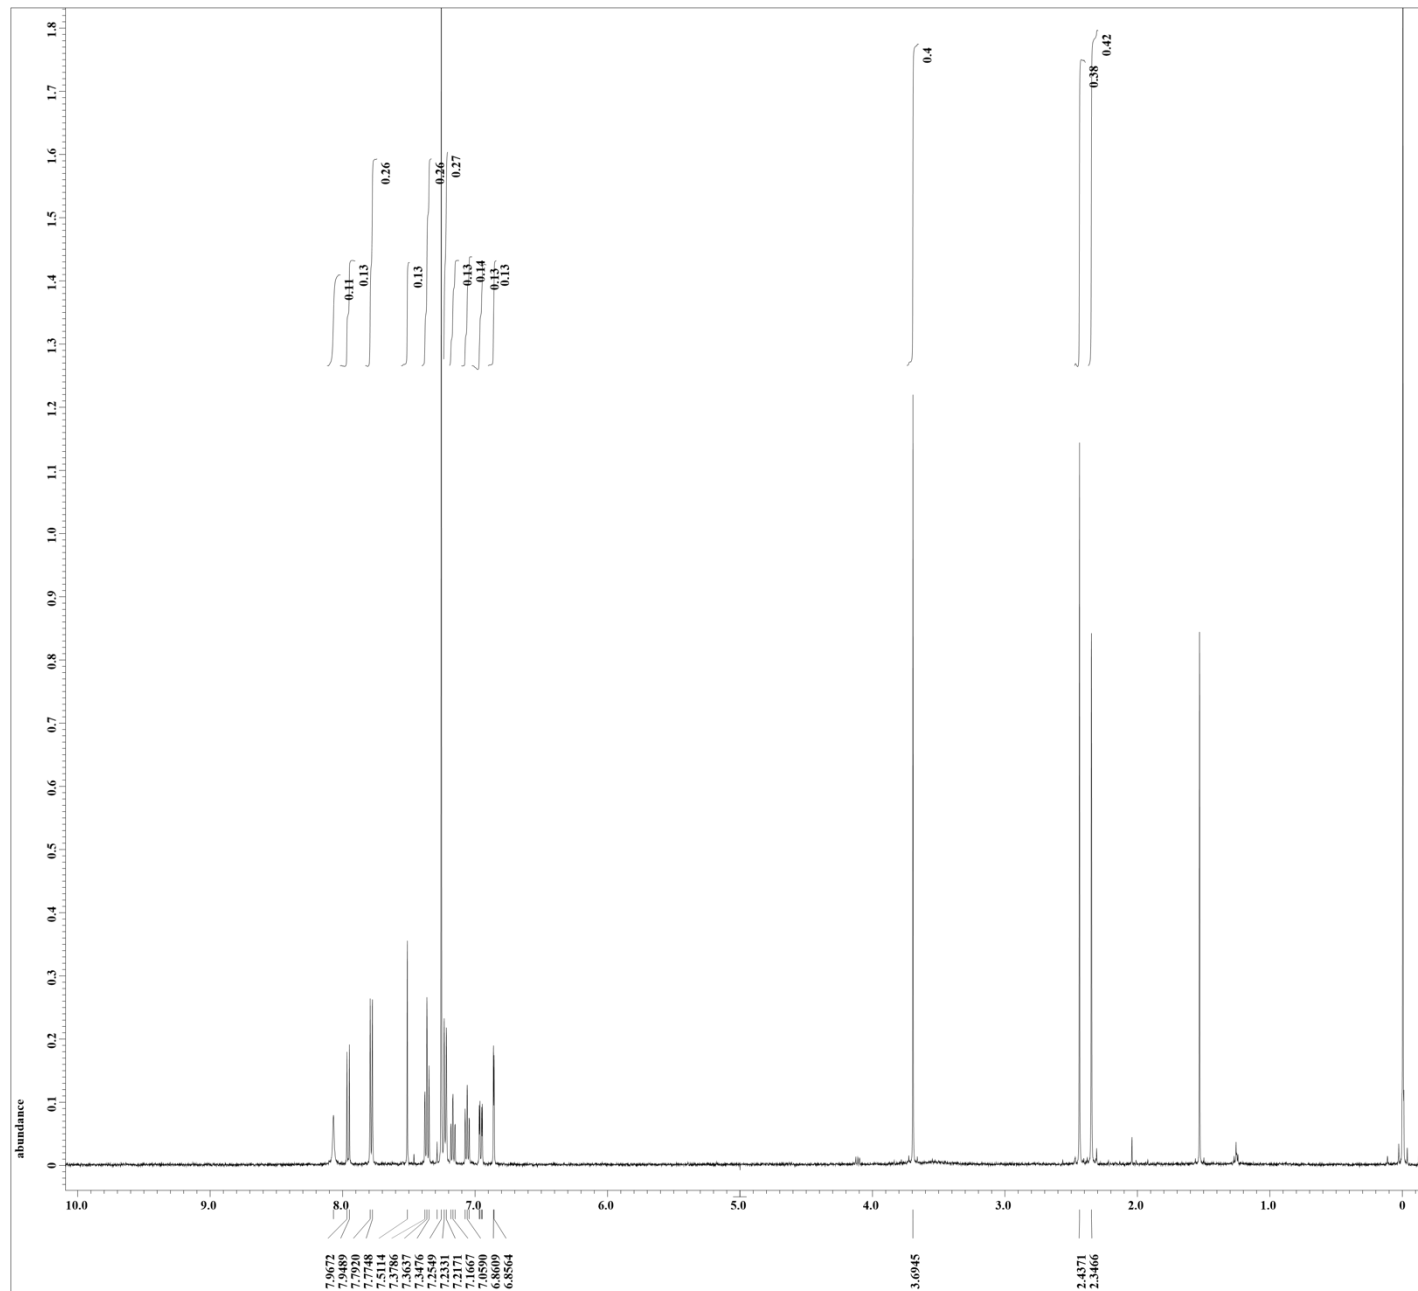

X : parts per Million : 1H



----- PROCESSING PARAMETERS -----  
 dc balance : 0 : FALSE  
 seXp : 2.0[Hz] : 0.0[s]  
 trapezoid3 : 0[%] : 80[%] : 100[%]  
 zeroFill : 1  
 fft : 1 : TRUE : TRUE  
 machinephase  
 ppm  
 Derived from: SH004-0604-2.jdf

Filename = SH004-0604-5.jdf  
 Author = delta  
 Experiment = single pulse dec  
 Sample\_id = S8765766  
 Solvent = CHLOROFORM-D  
 Creation time = 12-APR-2000 15:17:54  
 Revision time = 2-FEB-2020 11:42:59  
 Current Time = 2-FEB-2020 11:43:38  
 Comment = single pulse decouple  
 Data format = 1D COMPLEX  
 Dim Time = 26214  
 Dim\_title = 13C  
 Dim\_units = [ppm]  
 Dimensions = X  
 Site = ECA500  
 Spectrometer = DELTA2\_NMR  
 Field\_strength = 11.7473579[T] (500[MH  
 X\_acq\_duration = 0.83361792[s]  
 X\_domain = 13C  
 X\_freq = 125.76529768[MHz]  
 X\_offset = 100[ppm]  
 X\_points = 32768  
 X\_prescans = 4  
 X\_resolution = 1.19959034[Hz]  
 X\_sweep = 39.3081761[kHz]  
 Irr\_domain = 1H  
 Irr\_freq = 500.15991521[MHz]  
 Irr\_offset = 5.0[ppm]  
 Clipped = FALSE  
 Mod\_return = 1  
 Scans = 20611  
 Total\_scans = 20611  
 X\_90\_width = 12.8[us]  
 X\_acq\_time = 0.83361792[s]  
 X\_angle = 30[deg]  
 X\_atn = 5.3[db]  
 X\_pulse = 4.26666667[us]  
 Irr\_atn\_dec = 21.09[db]  
 Irr\_atn\_noe = 21.09[db]  
 Irr\_noise = WALZ  
 Decoupling = TRUE  
 Initial\_wait = 1[s]  
 Noe = TRUE  
 Noe\_time = 2[s]  
 RecVr\_gain = 56  
 Relaxation\_delay = 2[s]  
 Repetition\_time = 2.83361792[s]  
 Temp\_get = 24.6[dc]

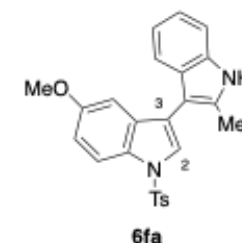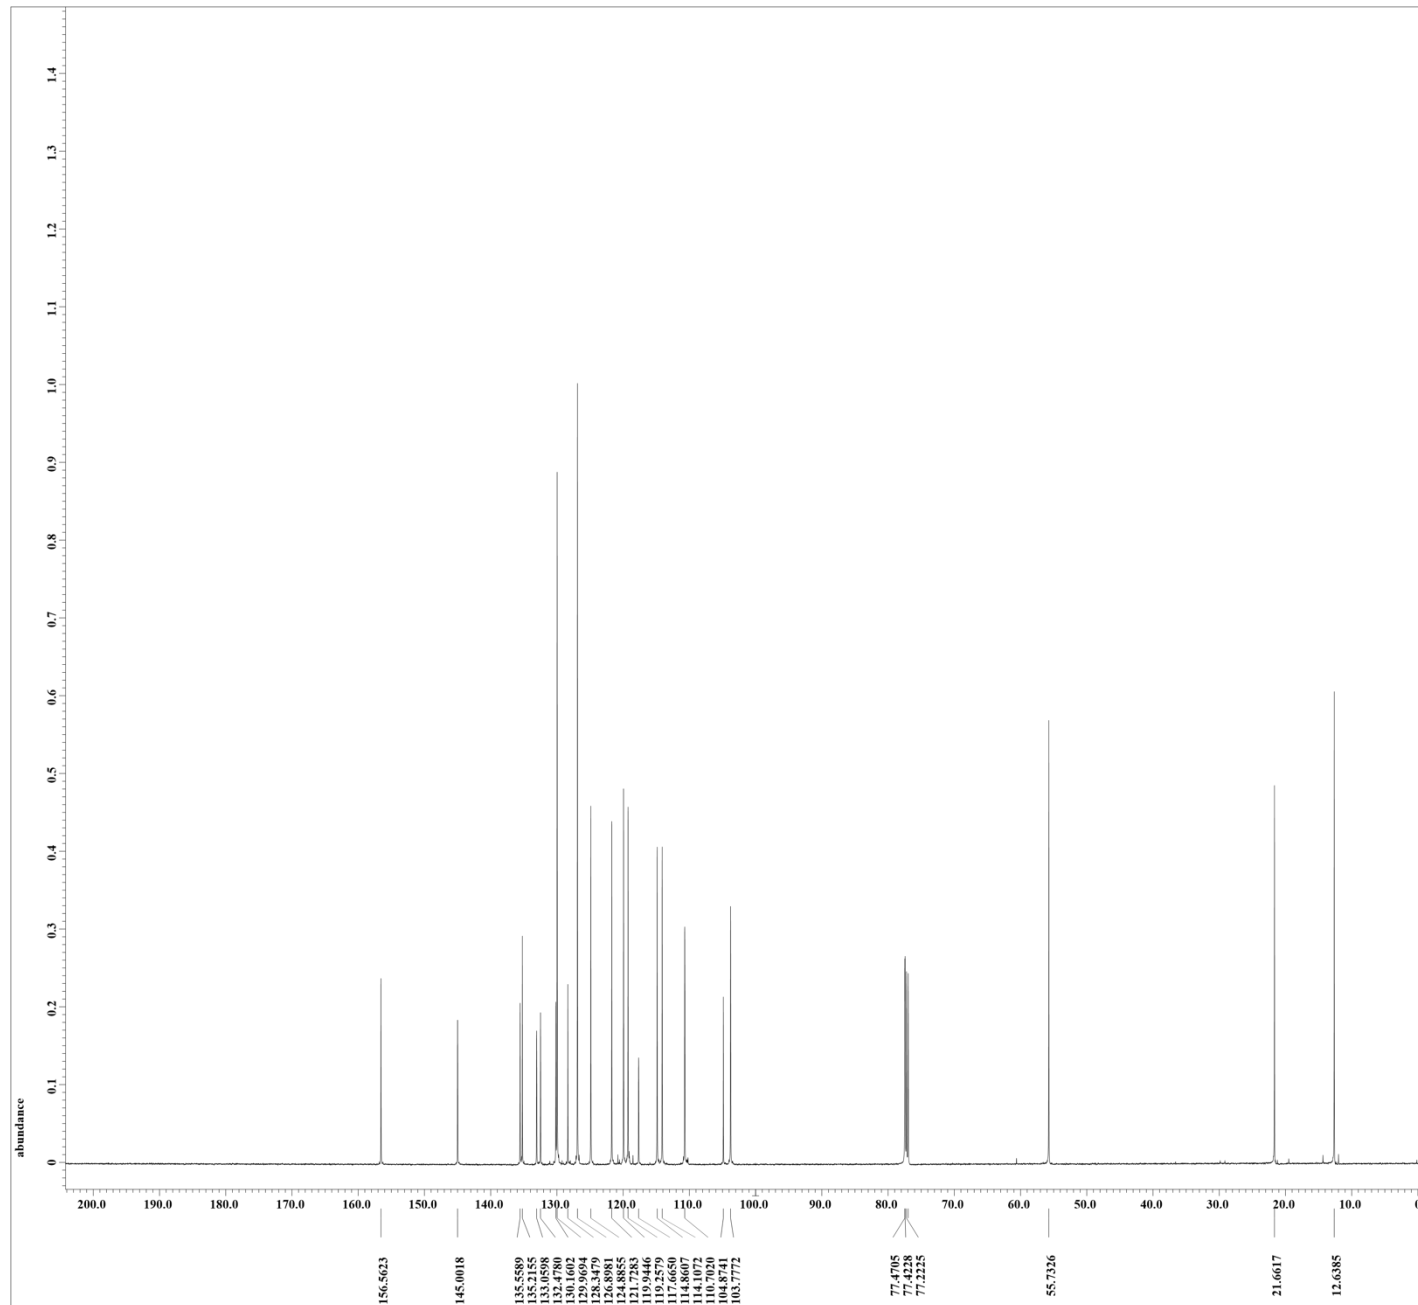

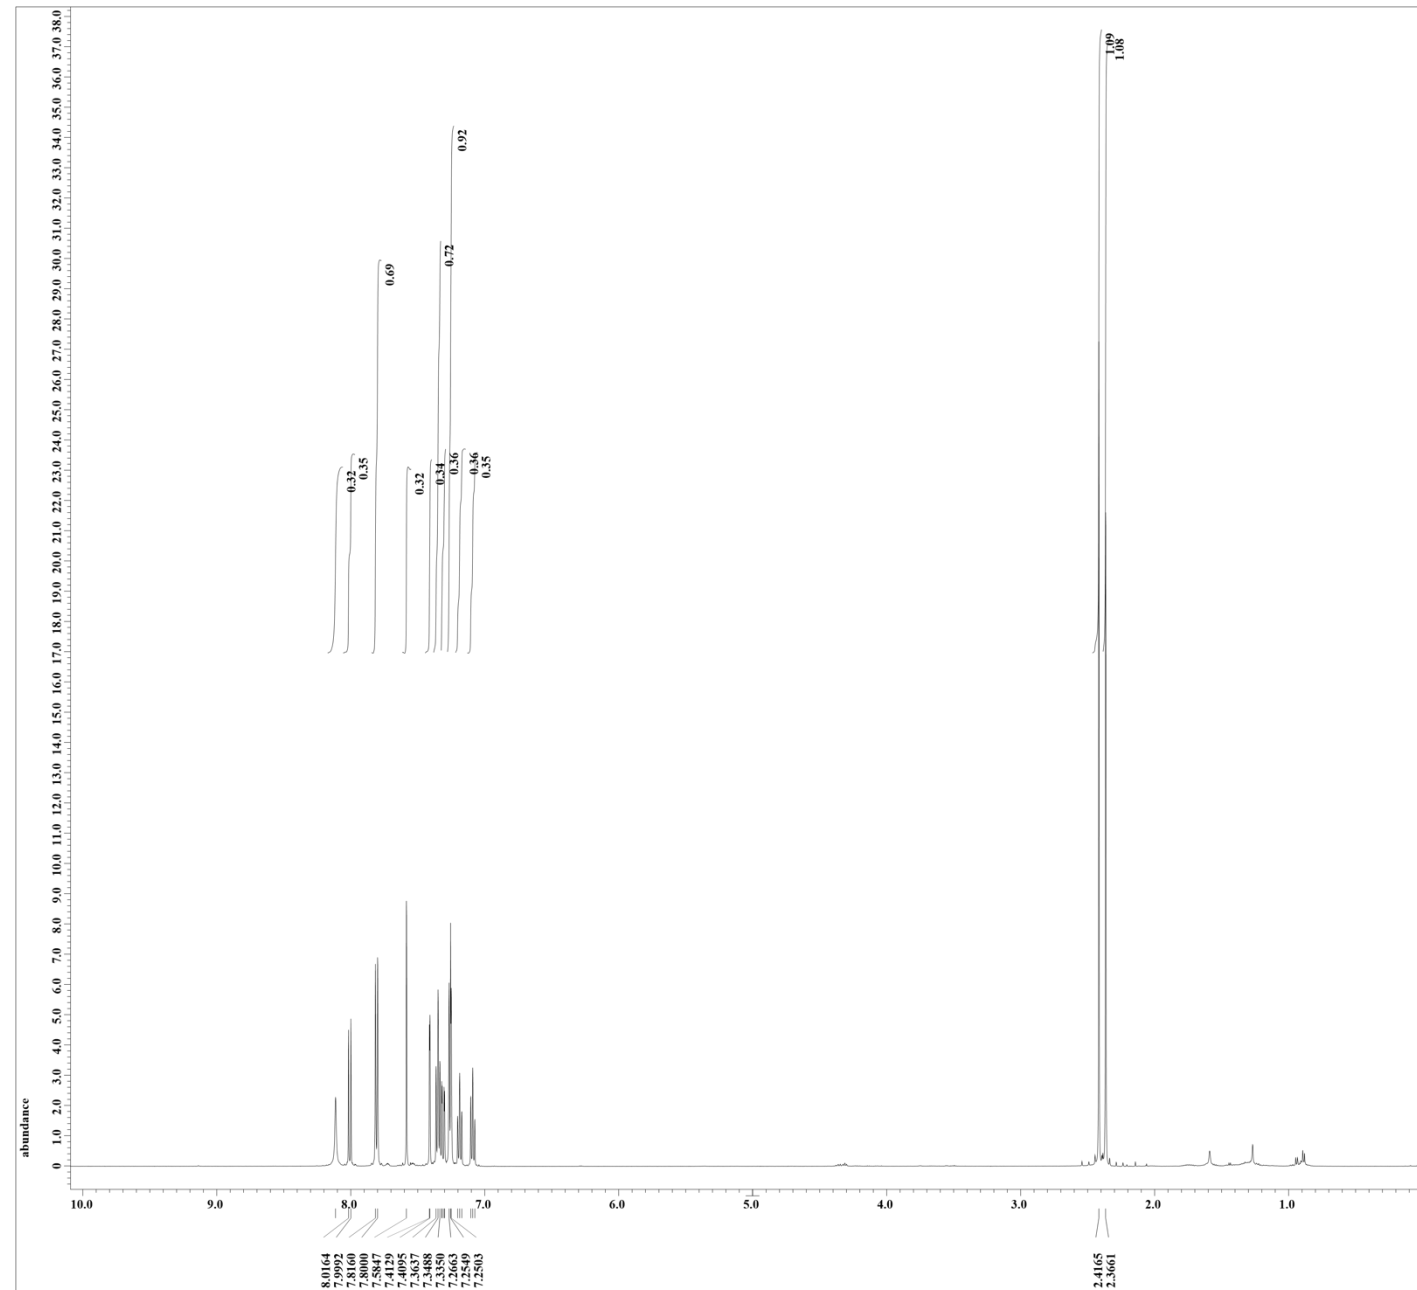

X : parts per Million : 1H



----- PROCESSING PARAMETERS -----  
 dc balance : 0 : FALSE  
 seXp : 0.2[Hz] : 0.0[s]  
 trapezoid3 : 0[%] : 80[%] : 100[%]  
 zeroFill : 1  
 fft : 1 : TRUE : TRUE  
 machinePhase  
 ppm  
 Derived from: SH004-1301-5C1-1.jdf

Filename = SH004-1301-5C1-4.jdf  
 Author = delta  
 Experiment = single pulse.ex2  
 Sample id = S8528920  
 Solvent = CHLOROFORM-D  
 Creation time = 17-APR-2000 16:30:01  
 Revision time = 1-FEB-2020 19:40:26  
 Current time = 1-FEB-2020 19:40:59  
 Comment = single pulse  
 Data format = 1D COMPLEX  
 Dim Time = 13107  
 Dim Title = 1H  
 Dim units = [ppm]  
 Dimensions = X  
 Site = ECA500  
 Spectrometer = DELTA2 NMR  
 Field strength = 11.7473579[T] (500[MH  
 X acq duration = 1.74587904[s]  
 X domain = 1H  
 X freq = 500.15991521[MHz]  
 X offset = 5.0[ppm]  
 X points = 16384  
 X prescans = 1  
 X resolution = 0.57277737[Hz]  
 X sweep = 9.38438438[kHz]  
 Irr domain = 1H  
 Irr freq = 500.15991521[MHz]  
 Irr offset = 5.0[ppm]  
 Tri domain = 1H  
 Tri freq = 500.15991521[MHz]  
 Tri offset = 5.0[ppm]  
 Clipped = TRUE  
 Mod return = 1  
 Scans = 8  
 Total scans = 8  
 X 90 width = 12[us]  
 X acq time = 1.74587904[s]  
 X angle = 45[deg]  
 X attn = 3.4[dB]  
 X pulse = 6[us]  
 Irr mode = Off  
 Tri mode = Off  
 Dante presat = FALSE  
 Initial wait = 1[s]  
 Recvr gain = 50  
 Relaxation delay = 5[s]  
 Repetition time = 6.74587904[s]  
 Temp get = 22.5[dc]

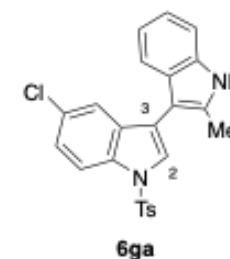



Filename = SH004-1301-2.jdf  
 Author = delta  
 Experiment = single\_pulse\_dec  
 Sample\_id = S8558165  
 Solvent = CHLOROFORM-D  
 Creation\_time = 31-JAN-2020 17:39:09  
 Revision\_time = 1-FEB-2020 19:51:08  
 Current\_time = 1-FEB-2020 19:51:57  
  
 Content = single pulse decouple  
 Data format = 1D COMPLEX  
 Dim\_size = 26214  
 Dim\_title = 13C  
 Dim\_units = [ppm]  
 Dimensions = X  
 Site = ECA 500  
 Spectrometer = DELTA2\_NMR  
  
 Field\_strength = 11.62926421[T] (500[M]  
 X\_acq\_duration = 0.8388608[s]  
 X\_domain = 13C  
 X\_freq = 124.5010059[MHz]  
 X\_offset = 100[ppm]  
 X\_points = 32768  
 X\_prescans = 4  
 X\_resolution = 1.1920929[Hz]  
 X\_sweep = 39.0625[kHz]  
 Irr\_domain = 1H  
 Irr\_freq = 495.13191398[MHz]  
 Irr\_offset = 5[ppm]  
 Clipped = FALSE  
 Mod\_return = 1  
 Scans = 3862  
 Total\_scans = 3862  
  
 X\_90\_width = 10.1[us]  
 X\_acq\_time = 0.8388608[s]  
 X\_angle = 30[deg]  
 X\_atn = 9.5[dB]  
 X\_pulse = 3.36666667[us]  
 Irr\_atn\_dec = 21.51[dB]  
 Irr\_atn\_noe = 21.51[dB]  
 Irr\_noise = WALTZ  
 Decoupling = TRUE  
 Initial\_wait = 1[s]  
 Noe = TRUE  
 Noe\_time = 2[s]  
 Recv\_gain = 60  
 Relaxation\_delay = 2[s]  
 Repetition\_time = 2.8388608[s]  
 Temp\_get = 24.5[dc]

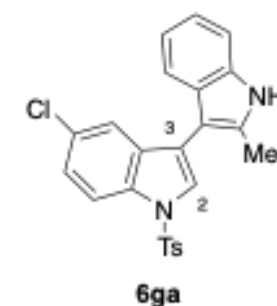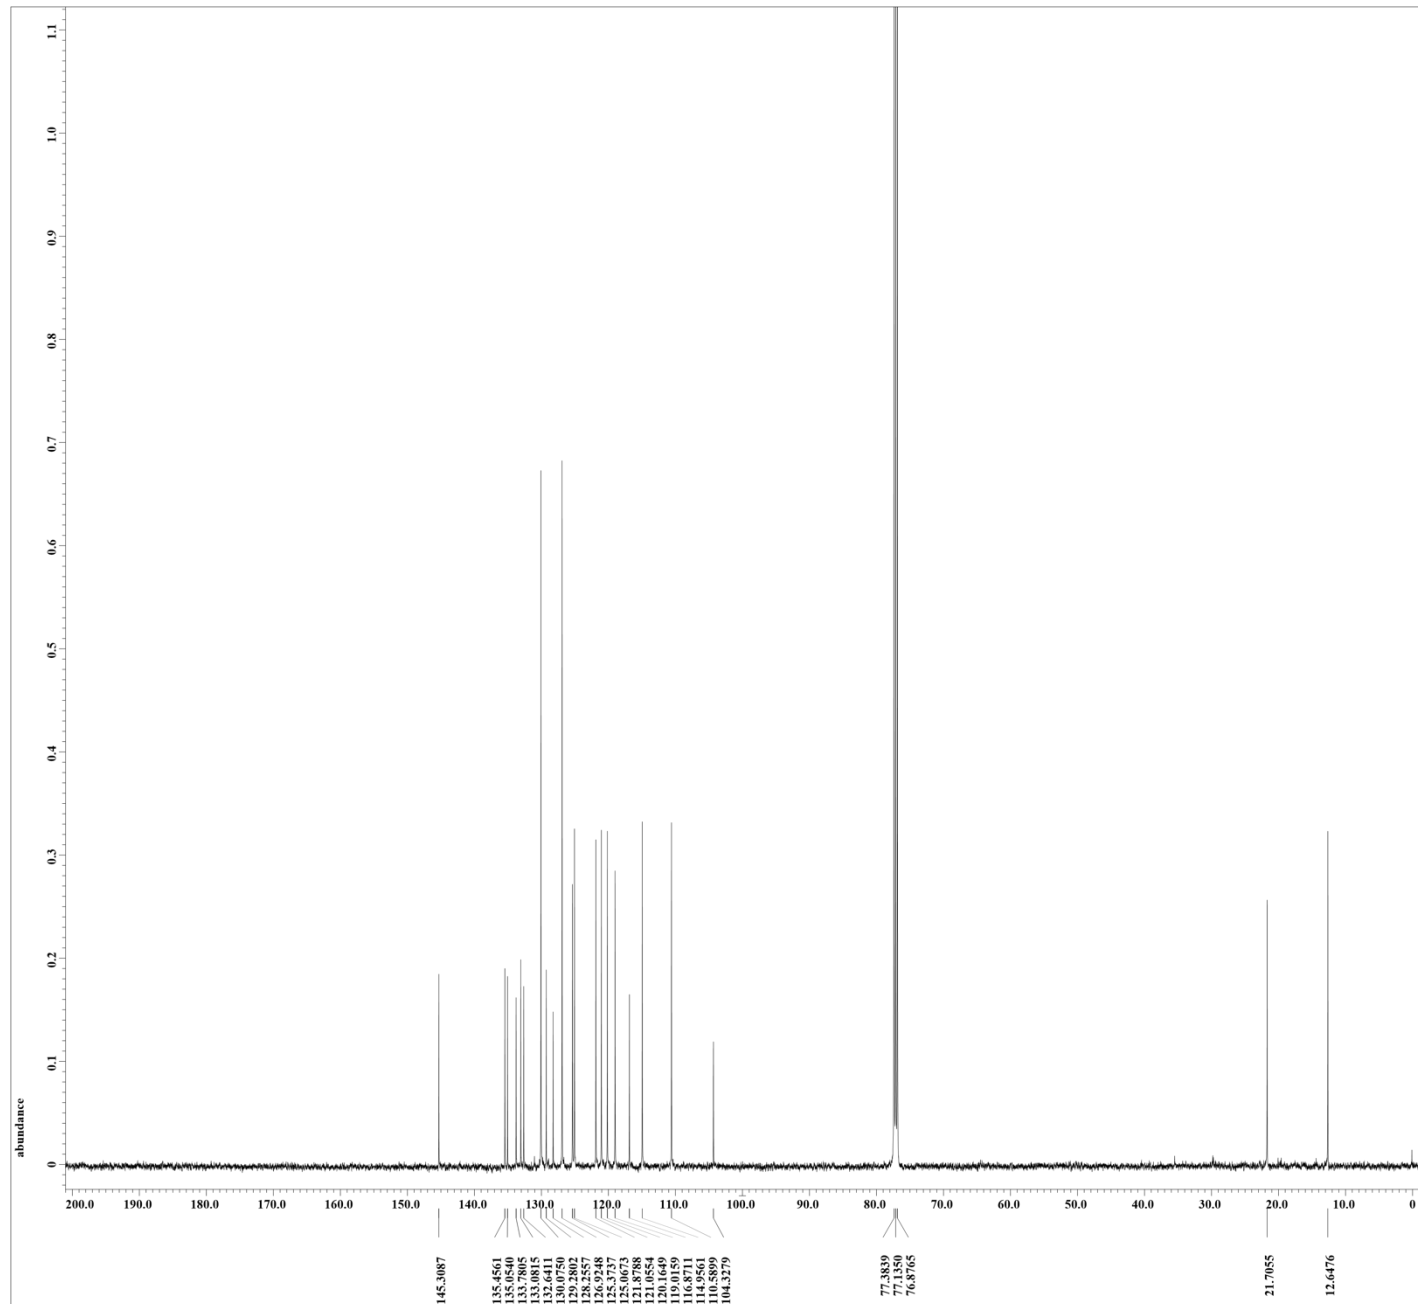



Filename = 7A200130-4.jdf  
 Author = delta  
 Experiment = single\_pulse.ex2  
 Sample\_id = S8349605  
 Solvent = CHLOROFORM-D  
 Creation\_time = 30-JAN-2020 08:49:11  
 Revision\_time = 30-JAN-2020 09:47:08  
 Current\_time = 30-JAN-2020 09:48:04

Content = single\_pulse  
 Data\_format = 1D\_COMPLEX  
 Dim\_size = 13107  
 Dim\_title = 1H  
 Dim\_units = [ppm]  
 Dimensions = X  
 Site = ECA 500  
 Spectrometer = DELTA2\_NMR

Field\_strength = 11.62926421 [T] (500[M]  
 X\_acq\_duration = 1.76422912 [s]  
 X\_domain = 1H  
 X\_freq = 495.13191398 [MHz]  
 X\_offset = 5 [ppm]  
 X\_points = 16384  
 X\_prescans = 1  
 X\_resolution = 0.5668198 [Hz]  
 X\_sweep = 9.28677563 [kHz]  
 Irr\_domain = 1H  
 Irr\_freq = 495.13191398 [MHz]  
 Irr\_offset = 5 [ppm]  
 Tri\_domain = 1H  
 Tri\_freq = 495.13191398 [MHz]  
 Tri\_offset = 5 [ppm]  
 Clipped = FALSE  
 Mod\_return = 1  
 Scans = 8  
 Total\_scans = 8

X\_90\_width = 11.3 [us]  
 X\_acq\_time = 1.76422912 [s]  
 X\_angle = 45 [deg]  
 X\_atn = 3.3 [dB]  
 X\_pulse = 5.65 [us]  
 Irr\_mode = Off  
 Tri\_mode = Off  
 Dante\_presat = FALSE  
 Initial\_wait = 1 [s]  
 Recov\_gain = 50  
 Relaxation\_delay = 5 [s]  
 Repetition\_time = 6.76422912 [s]  
 Temp\_get = 23.5 [dC]

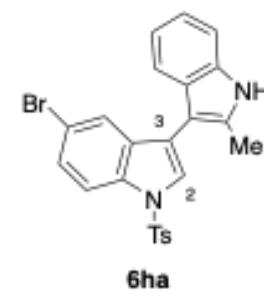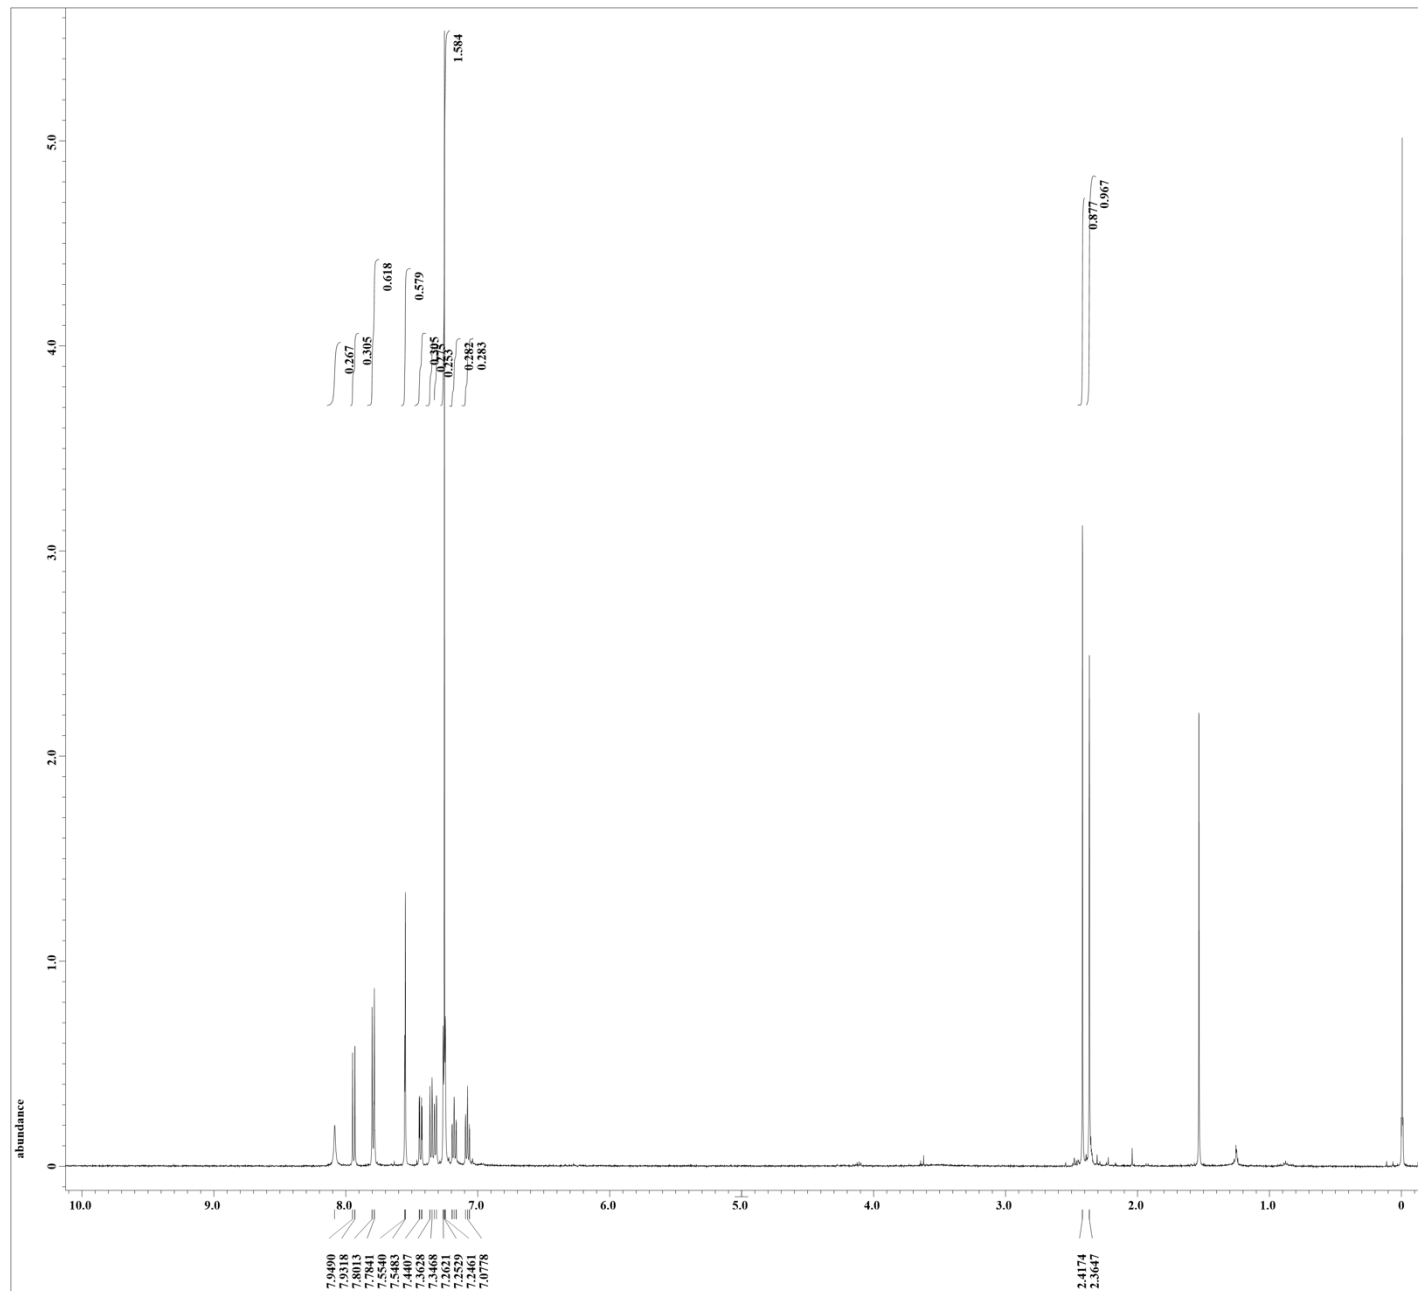

X : parts per Million : 1H

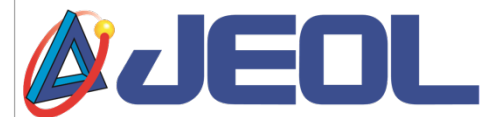

Filename = 7A200130-4.jdf  
 Author = delta  
 Experiment = single\_pulse\_dec  
 Sample\_id = S#630137  
 Solvent = CHLOROFORM-D  
 Creation\_time = 31-JAN-2020 07:13:17  
 Revision\_time = 31-JAN-2020 08:09:47  
 Current\_time = 31-JAN-2020 08:10:39

Content = single\_pulse\_decouple  
 Data\_format = 1D\_COMPLEX  
 Dim\_size = 26214  
 Dim\_title = 13C  
 Dim\_units = [ppm]  
 Dimensions = X  
 Site = ECA 500  
 Spectrometer = DELTA2\_NMR

Field\_strength = 11.62926421[T] (500[M]  
 X\_acq\_duration = 0.8388608[s]  
 X\_domain = 13C  
 X\_freq = 124.5010059[MHz]  
 X\_offset = 100[ppm]  
 X\_points = 32768  
 X\_prescans = 4  
 X\_resolution = 1.1920929[Hz]  
 X\_sweep = 39.0625[kHz]  
 Irr\_domain = 1H  
 Irr\_freq = 495.13191398[MHz]  
 Irr\_offset = 5[ppm]  
 Clipped = TRUE  
 Mod\_return = 1  
 Scans = 18528  
 Total\_scans = 18528

X\_90\_width = 10.1[us]  
 X\_acq\_time = 0.8388608[s]  
 X\_angle = 30[deg]  
 X\_atn = 9.5[dB]  
 X\_pulse = 3.36666667[us]  
 Irr\_atn\_dec = 21.51[dB]  
 Irr\_atn\_noe = 21.51[dB]  
 Irr\_noise = WALTZ  
 Decoupling = TRUE  
 Initial\_wait = 1[s]  
 Noe = TRUE  
 Noe\_time = 2[s]  
 Recvr\_gain = 60  
 Relaxation\_delay = 2[s]  
 Repetition\_time = 2.8388608[s]  
 Temp\_get = 24.1[dc]

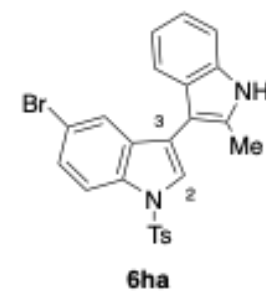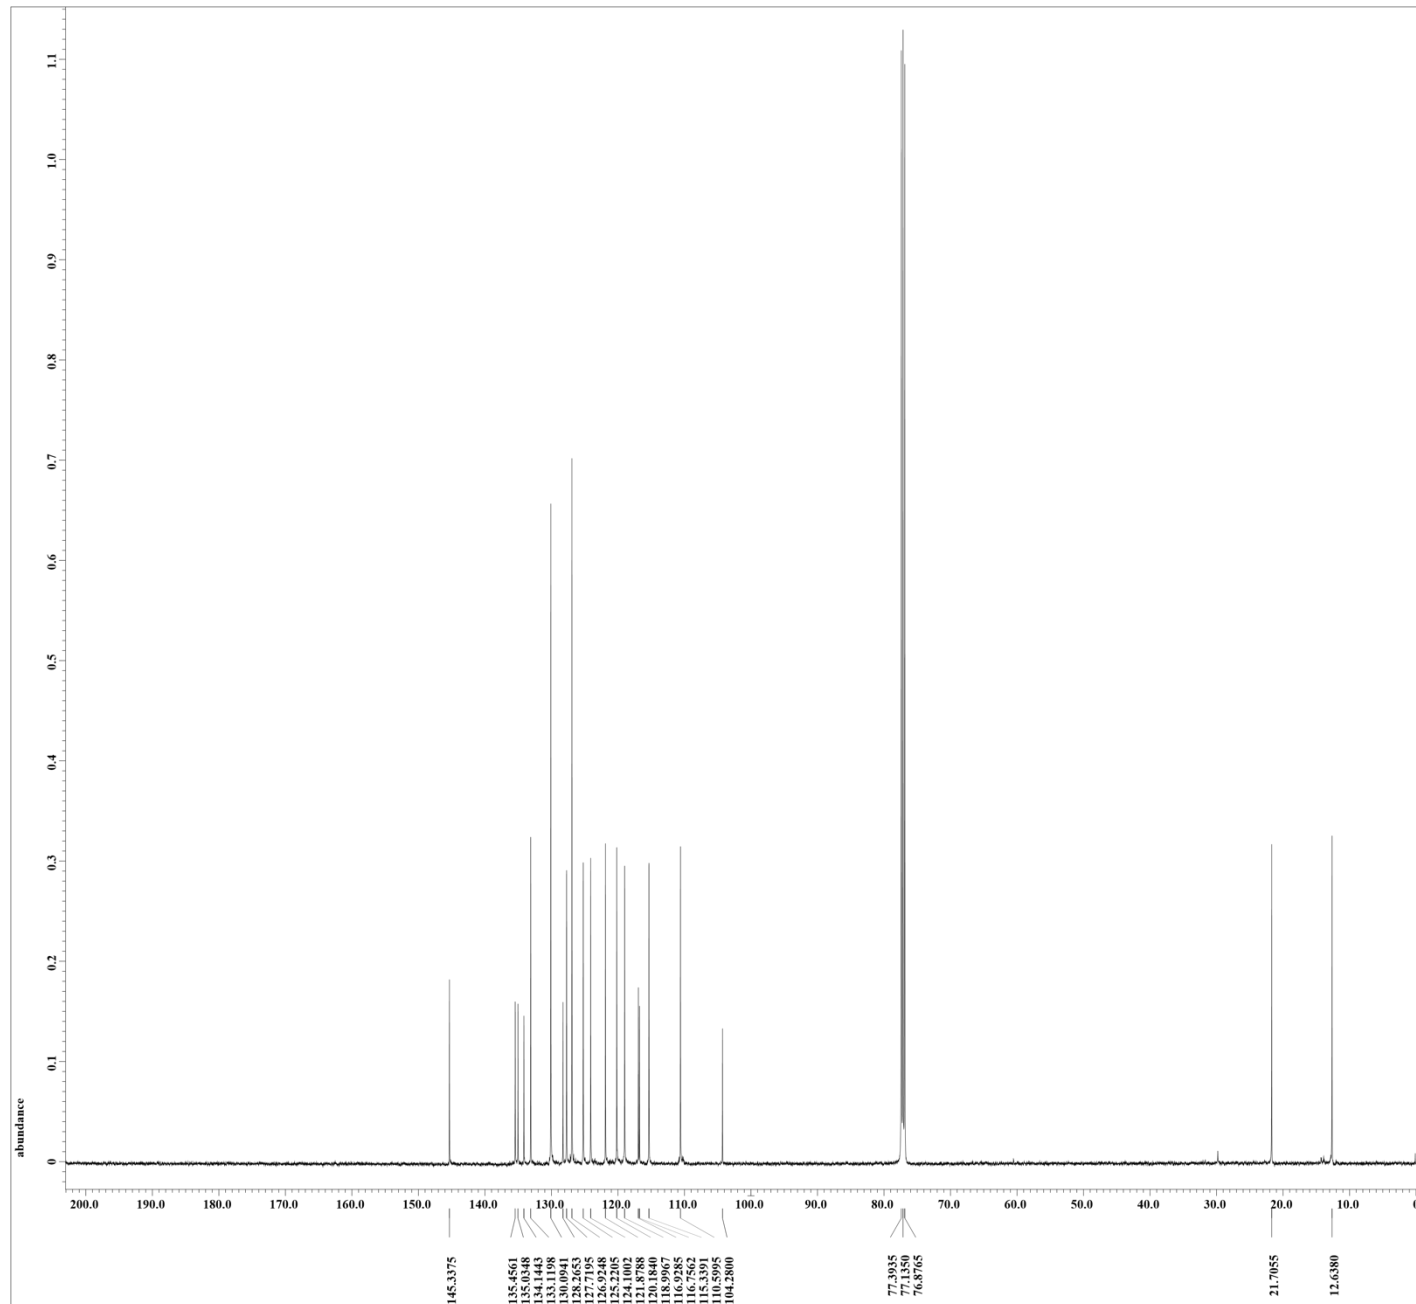

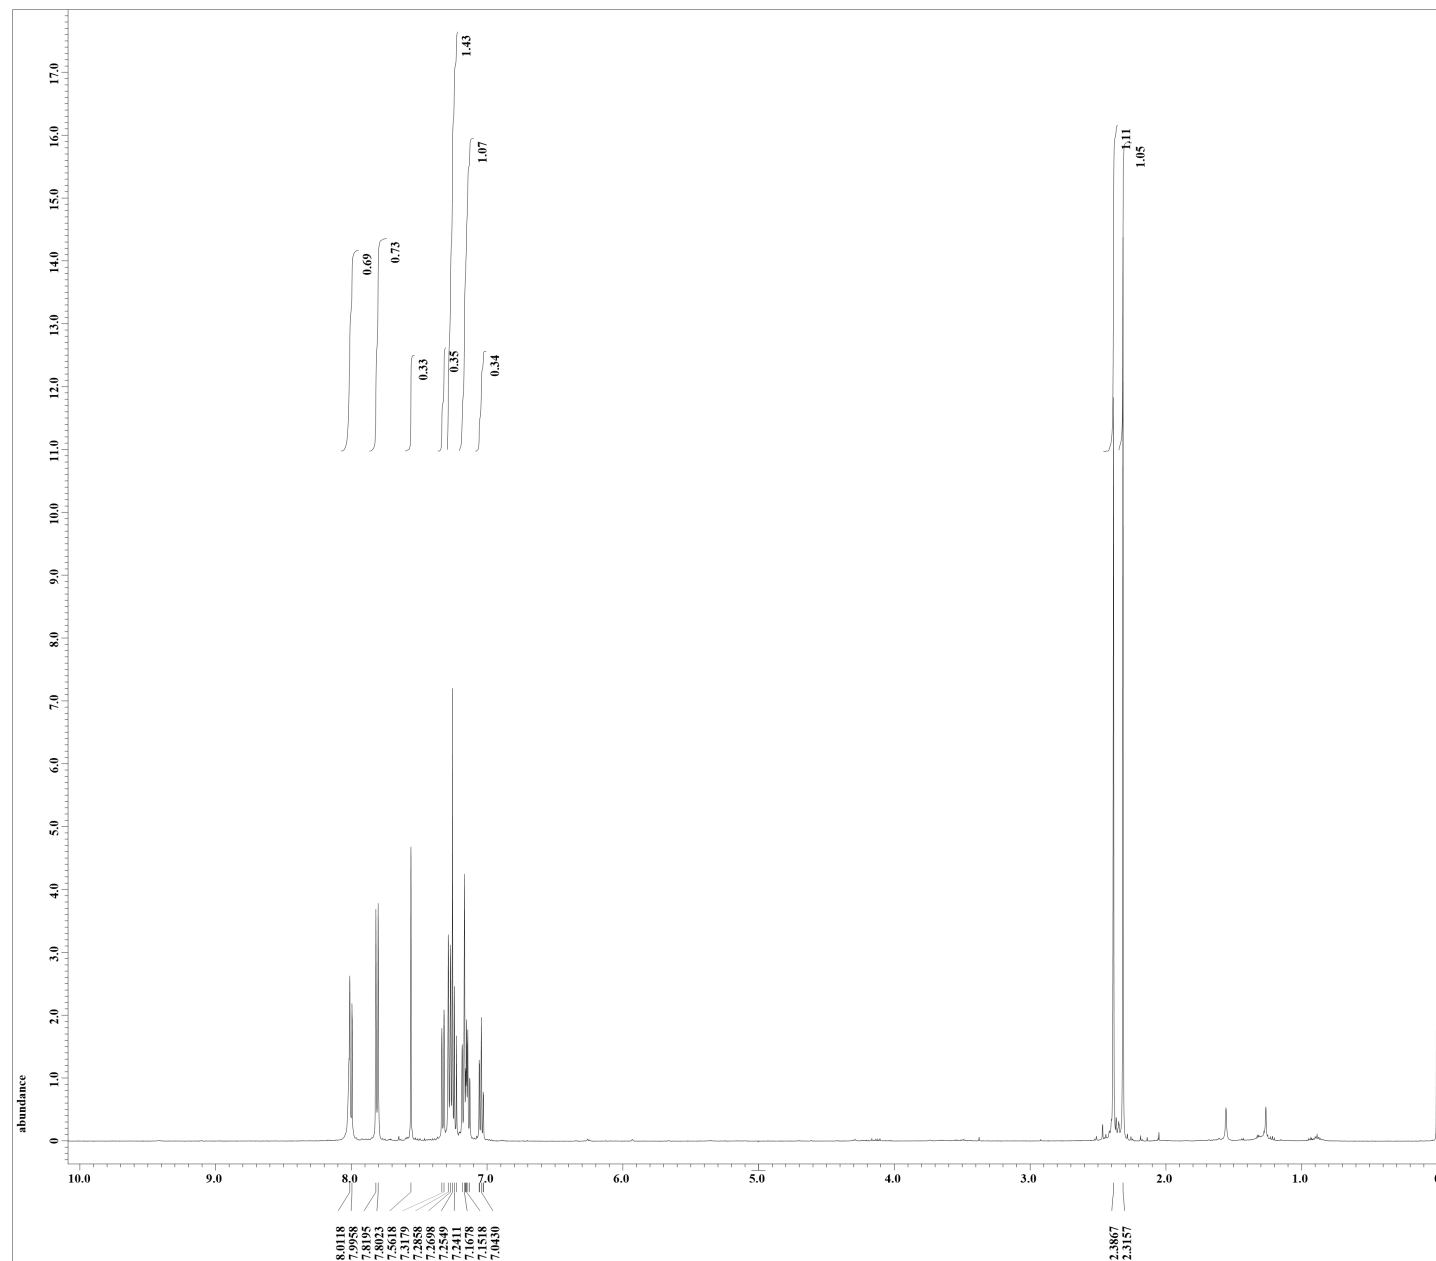

X : parts per Million : 1H

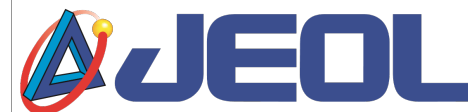

----- PROCESSING PARAMETERS -----  
 dc balance : 0 : FALSE  
 secp : 0.2[Hz] : 0.0[s]  
 trapezoid3 : 0[%] : 80[%] : 100[%]  
 zerofill : 1  
 fft : 1 : TRUE : TRUE  
 machinephase  
 ppm

Derived from: SH004-1603-4Cl-1.jdf

Filename = SH004-1603-4Cl-4.jdf  
 Author = delta  
 Experiment = single pulse.ex2  
 Sample\_id = S#618278  
 Solvent = CHLOROFORM-D  
 Creation\_time = 19-APR-2000 18:58:52  
 Revision\_time = 2-FEB-2020 18:11:13  
 Current\_time = 2-FEB-2020 18:11:34

Comment = single pulse  
 Data\_format = 1D COMPLEX  
 Dim\_size = 13107  
 Dim\_title = 1H  
 Dim\_units = [ppm]  
 Dimensions = X  
 Site = ECA500  
 Spectrometer = DELTA2\_NMR

Field\_strength = 11.7473579[T] (500[MH  
 X\_acq\_duration = 1.74587904[s]  
 X\_domain = 1H  
 X\_freq = 500.15991521[MHz]  
 X\_offset = 5.0[ppm]  
 X\_points = 16384  
 X\_prescans = 1  
 X\_resolution = 0.57277737[Hz]  
 X\_sweep = 9.38438438[kHz]  
 Irr\_domain = 1H  
 Irr\_freq = 500.15991521[MHz]  
 Irr\_offset = 5.0[ppm]  
 Tri\_domain = 1H  
 Tri\_freq = 500.15991521[MHz]  
 Tri\_offset = 5.0[ppm]  
 Clipped = FALSE  
 Mod\_return = 1  
 Scans = 8  
 Total\_scans = 8

X\_90\_width = 12[us]  
 X\_acq\_time = 1.74587904[s]  
 X\_angle = 45[deg]  
 X\_atn = 3.4[dB]  
 X\_pulse = 6[us]  
 Irr\_mode = Off  
 Tri\_mode = Off  
 Dante\_presat = FALSE  
 Initial\_wait = 1[s]  
 Recvr\_gain = 50  
 Relaxation\_delay = 5[s]  
 Repetition\_time = 6.74587904[s]  
 Temp\_get = 23.7[dc]

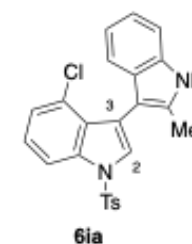

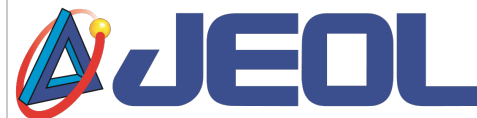

----- PROCESSING PARAMETERS -----  
dc balance : 0 : FALSE  
sexp : 2.0[Hz] : 0.0[s]  
trapezoid3 : 0[%] : 80[%] : 100[%]  
zerofill : 1  
fft : 1 : TRUE : TRUE  
machinphase  
ppm

Derived from: SH004-1603-4Cl-2.jdf

Filename = SH004-1603-4Cl-4.jdf  
Author = delta  
Experiment = single\_pulse\_dec  
Sample\_id = S#619146  
Solvent = CHLOROFORM-D  
Creation\_time = 20-APR-2000 09:43:48  
Revision\_time = 3-FEB-2020 07:56:42  
Current\_Time = 3-FEB-2020 07:58:53

Comment = single pulse decouple  
Data\_format = 1D COMPLEX  
Dim\_size = 26214  
Dim\_title = 13C  
Dim\_units = [ppm]  
Dimensions = X  
Site = ECA500  
Spectrometer = DELTA2\_NMR

Field\_strength = 11.7473579[T] (500[MH  
X\_acq\_duration = 0.83361792[s]  
X\_domain = 13C  
X\_freq = 125.76529768[MHz]  
X\_offset = 100[ppm]  
X\_points = 32768  
X\_prescans = 4  
X\_resolution = 1.19959034[Hz]  
X\_sweep = 39.3081761[kHz]  
Irr\_domain = 1H  
Irr\_freq = 500.15991521[MHz]  
Irr\_offset = 5.0[ppm]  
Clipped = FALSE  
Mod\_return = 1  
Scans = 18715  
Total\_scans = 18715

X\_90\_width = 12.8[us]  
X\_acq\_time = 0.83361792[s]  
X\_angle = 30[deg]  
X\_atn = 4.3[dB]  
X\_pulse = 4.26666667[us]  
Irr\_atn\_dec = 21.09[dB]  
Irr\_atn\_noe = 21.09[dB]  
Irr\_noise = WALTZ  
Decoupling = TRUE  
Initial\_wait = 1[s]  
Noe = TRUE  
Noe\_time = 2[s]  
RecVr\_gain = 56  
Relaxation\_delay = 2[s]  
Repetition\_time = 2.83361792[s]  
Temp\_get = 25.1[degC]

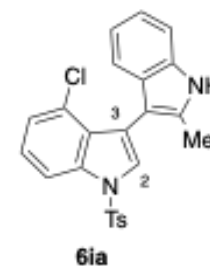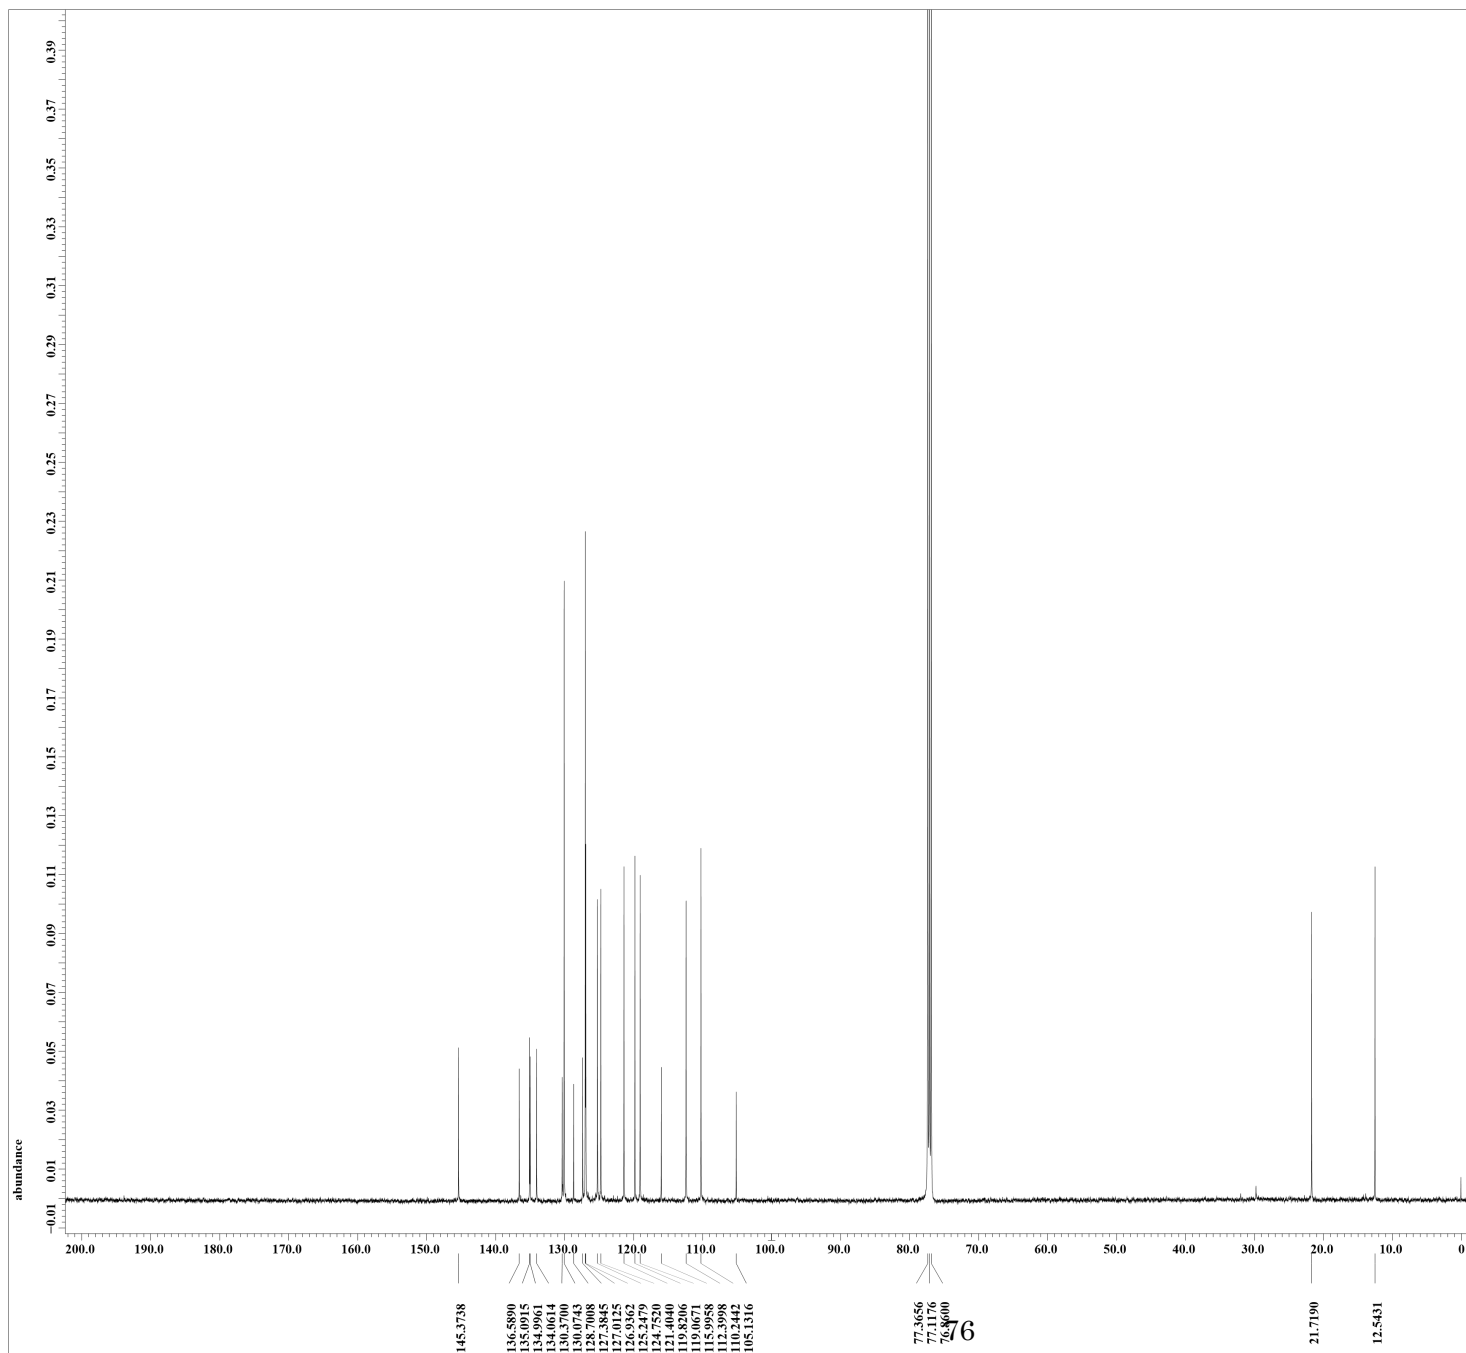



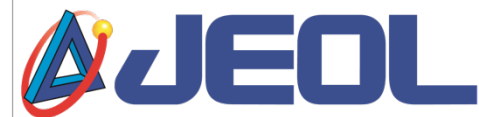

----- PROCESSING PARAMETERS -----  
 dc balance : 0 : FALSE  
 seXP : 0.2[Hz] : 0.0[s]  
 trapezoid3 : 0[%] : 80[%] : 100[%]  
 zeroFill : 1  
 fft : 1 : TRUE : TRUE  
 machinePhase  
 ppm  
 Derived from: SH004-1504-6Cl-1.jdf

Filename = SH004-1504-6Cl-6.jdf  
 Author = delta  
 Experiment = single\_pulse.ex2  
 Sample\_id = S8323329  
 Solvent = CHLOROFORM-D  
 Creation time = 19-APR-2000 10:47:18  
 Revision time = 2-FEB-2020 11:39:07  
 Current time = 2-FEB-2020 11:39:28  
 Comment = single\_pulse  
 Data format = 1D COMPLEX  
 Dir Time = 13107  
 Dir\_title = 1H  
 Dir\_units = [ppm]  
 Dimensions = X  
 Site = ECA500  
 Spectrometer = DELTA2 NMR  
 Field\_strength = 11.7473579[T] (500[MH  
 X\_acq\_duration = 1.74587904[s]  
 X\_domain = 1H  
 X\_freq = 500.15991521[MHz]  
 X\_offset = 5.0[ppm]  
 X\_points = 16384  
 X\_prescans = 1  
 X\_resolution = 0.57277737[Hz]  
 X\_sweep = 9.38438438[kHz]  
 Irr\_domain = 1H  
 Irr\_freq = 500.15991521[MHz]  
 Irr\_offset = 5.0[ppm]  
 Tri\_domain = 1H  
 Tri\_freq = 500.15991521[MHz]  
 Tri\_offset = 5.0[ppm]  
 Clipped = TRUE  
 Mod return = 1  
 Scans = 8  
 Total\_scans = 8  
 X\_90\_width = 12[us]  
 X\_acq time = 1.74587904[s]  
 X\_angle = 45[deg]  
 X\_atn = 3.4[dB]  
 X\_pulse = 6[us]  
 Irr\_mode = Off  
 Tri\_mode = Off  
 Dante\_preset = FALSE  
 Initial wait = 1[s]  
 Recvr\_gain = 50  
 Relaxation\_delay = 5[s]  
 Repetition\_time = 6.74587904[s]  
 Temp\_get = 23.7[dc]

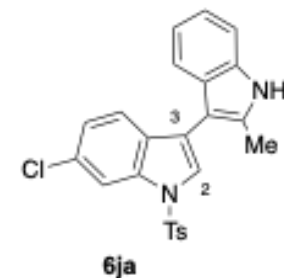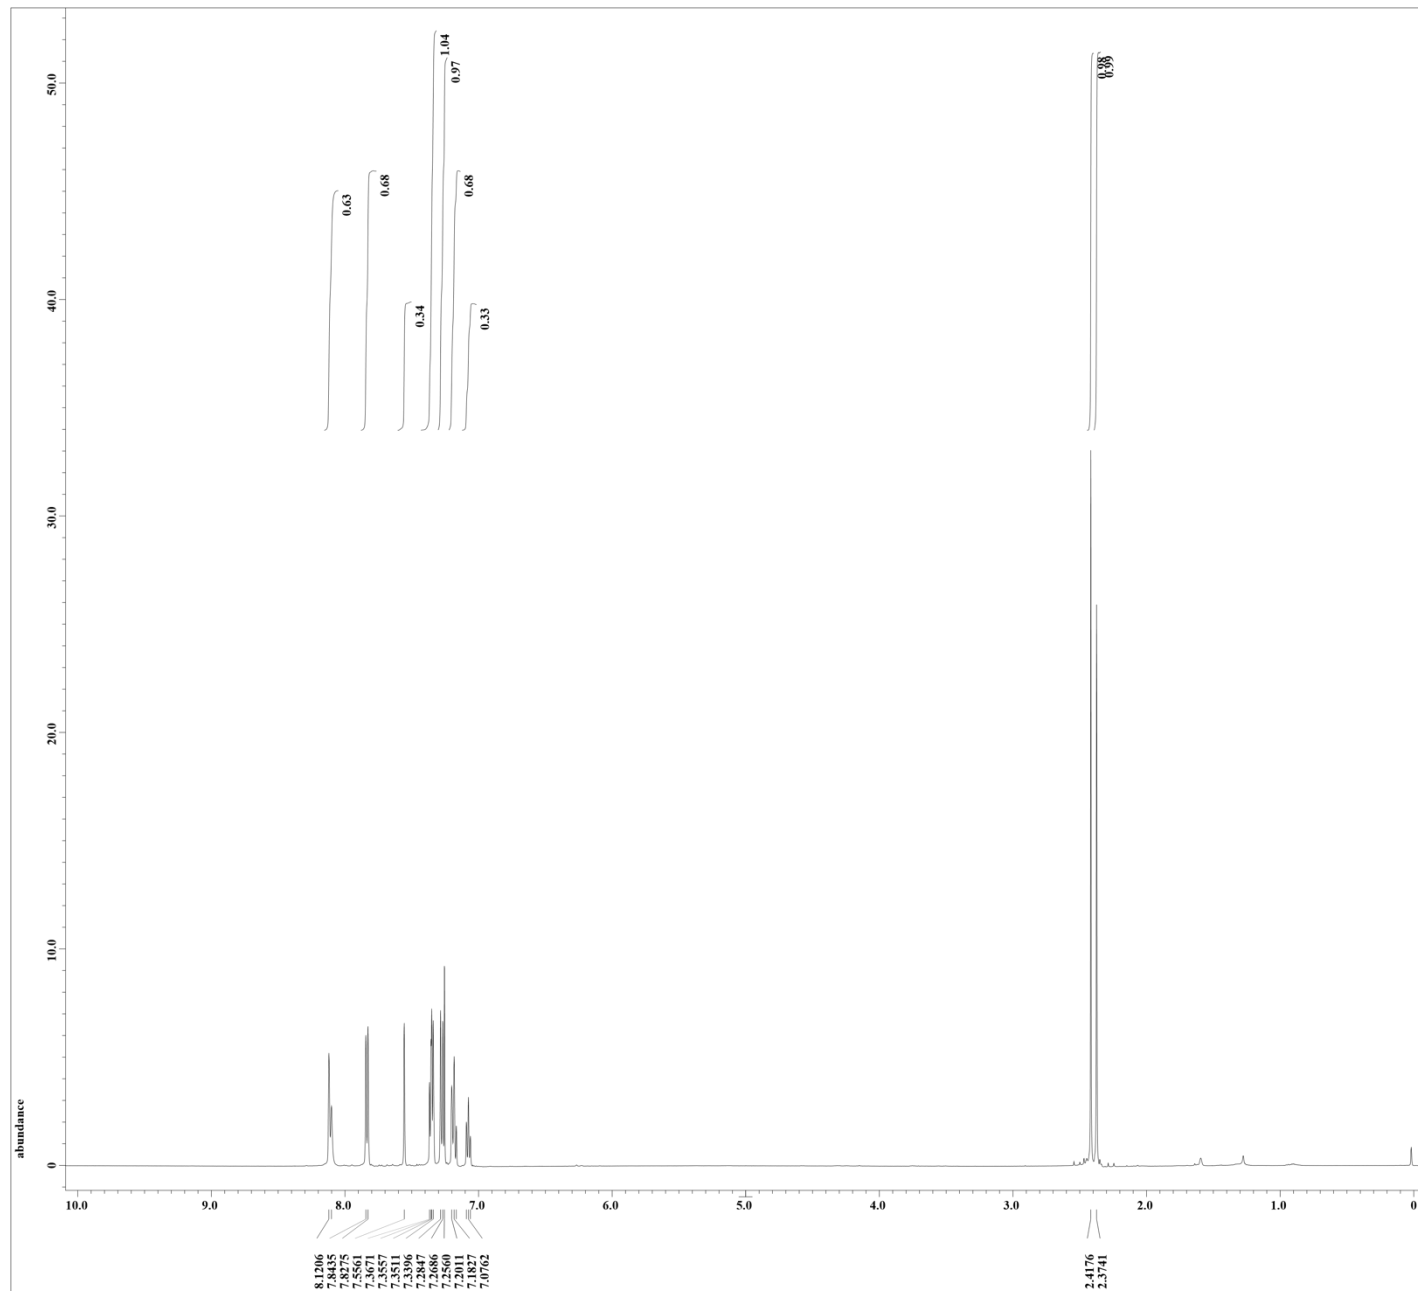

X : parts per Million : 1H



----- PROCESSING PARAMETERS -----  
 dc balance : 0 : FALSE  
 seXp : 2.0[Hz] : 0.0[s]  
 trapezoid3 : 0[%] : 80[%] : 100[%]  
 zeroFill : 1  
 fft : 1 : TRUE : TRUE  
 machinephase  
 ppm  
 Derived from: SH004-1504-6C1-2.jdf

Filename = SH004-1504-6C1-4.jdf  
 Author = delta  
 Experiment = single pulse dec  
 Sample\_id = S8325152  
 Solvent = CHLOROFORM-D  
 Creation time = 19-APR-2000 13:12:47  
 Revision time = 2-FEB-2020 11:39:40  
 Current time = 2-FEB-2020 11:40:15  
 Comment = single pulse decouple  
 Data format = 1D COMPLEX  
 Dim\_Tsize = 26214  
 Dim\_title = 13C  
 Dim\_units = [ppm]  
 Dimensions = X  
 Site = ECA500  
 Spectrometer = DELTA2\_NMR  
 Field\_strength = 11.7473579[T] (500[MH  
 X\_acq\_duration = 0.83361792[s]  
 X\_domain = 13C  
 X\_freq = 125.76529768[MHz]  
 X\_offset = 100[ppm]  
 X\_points = 32768  
 X\_prescans = 4  
 X\_resolution = 1.19959034[Hz]  
 X\_sweep = 39.3081761[kHz]  
 Irr\_domain = 1H  
 Irr\_freq = 500.15991521[MHz]  
 Irr\_offset = 5.0[ppm]  
 Clipped = FALSE  
 Mod\_return = 1  
 Scans = 3025  
 Total\_scans = 3025  
 X\_90\_width = 12.8[us]  
 X\_acq\_time = 0.83361792[s]  
 X\_angle = 30[deg]  
 X\_atn = 5.3[db]  
 X\_pulse = 4.26666667[us]  
 Irr\_atn\_dec = 21.09[db]  
 Irr\_atn\_noe = 21.09[db]  
 Irr\_noise = WALTE  
 Decoupling = TRUE  
 Initial\_wait = 1[s]  
 Noe = TRUE  
 Noe\_time = 2[s]  
 RecVr\_gain = 54  
 Relaxation\_delay = 2[s]  
 Repetition\_time = 2.83361792[s]  
 Temp\_get = 23.9[dc]

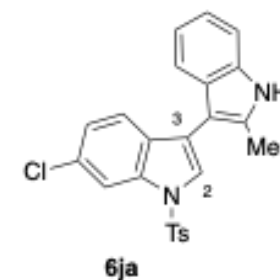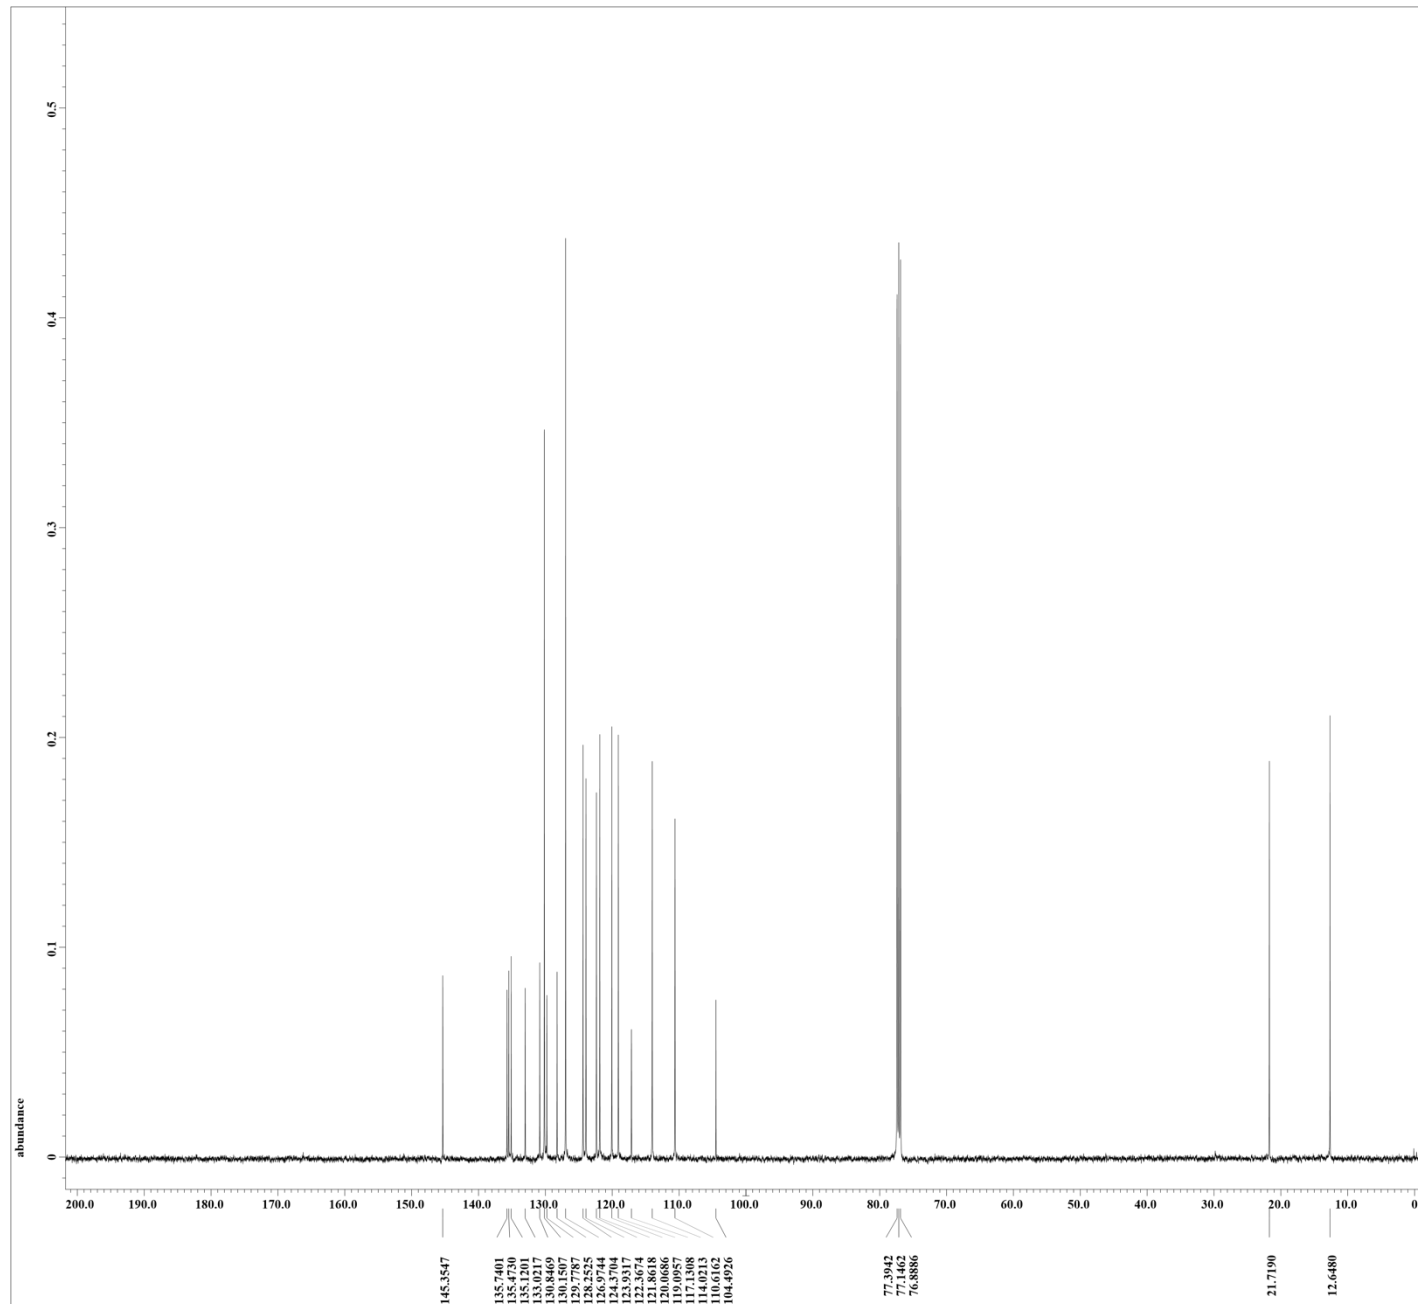



----- PROCESSING PARAMETERS -----  
 dc balance : 0 : FALSE  
 seXP : 0.2[Hz] : 0.0[s]  
 trapezoid3 : 0[%] : 80[%] : 100[%]  
 zeroFill : 1  
 fft : 1 : TRUE : TRUE  
 machinePhase  
 ppm  
 Derived from: TA2019-1231-8.jdf

Filename = TA2019-1231-18.jdf  
 Author = delta  
 Experiment = single\_pulse.ex2  
 Sample\_id = S8540954  
 Solvent = CHLOROFORM-D  
 Creation\_time = 17-MAR-2000 16:51:07  
 Revision\_time = 1-FEB-2020 23:41:42  
 Current\_time = 1-FEB-2020 23:41:59  
 Comment = single\_pulse  
 Data\_format = 1D COMPLEX  
 Dim\_Time = 13107  
 Dim\_title = 1H  
 Dim\_units = [ppm]  
 Dimensions = X  
 Site = ECA500  
 Spectrometer = DELTA2 NMR  
 Field\_strength = 11.7473579[T] (500[MH  
 X\_acq\_duration = 1.74587904[s]  
 X\_domain = 1H  
 X\_freq = 500.15991521[MHz]  
 X\_offset = 5.0[ppm]  
 X\_points = 16384  
 X\_prescans = 1  
 X\_resolution = 0.57277737[Hz]  
 X\_sweep = 9.38438438[kHz]  
 Irr\_domain = 1H  
 Irr\_freq = 500.15991521[MHz]  
 Irr\_offset = 5.0[ppm]  
 Tri\_domain = 1H  
 Tri\_freq = 500.15991521[MHz]  
 Tri\_offset = 5.0[ppm]  
 Clipped = FALSE  
 Mod\_return = 1  
 Scans = 8  
 Total\_scans = 8  
 X\_90\_width = 12[us]  
 X\_acq\_time = 1.74587904[s]  
 X\_angle = 45[deg]  
 X\_atn = 3.4[db]  
 X\_pulse = 6[us]  
 Irr\_mode = Off  
 Tri\_mode = Off  
 Dante\_presat = FALSE  
 Initial\_wait = 1[s]  
 Recvr\_gain = 50  
 Relaxation\_delay = 5[s]  
 Repetition\_time = 6.74587904[s]  
 Temp\_get = 22.5[dc]

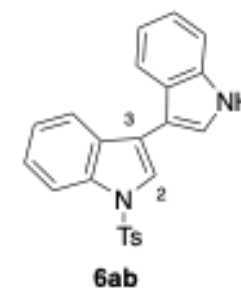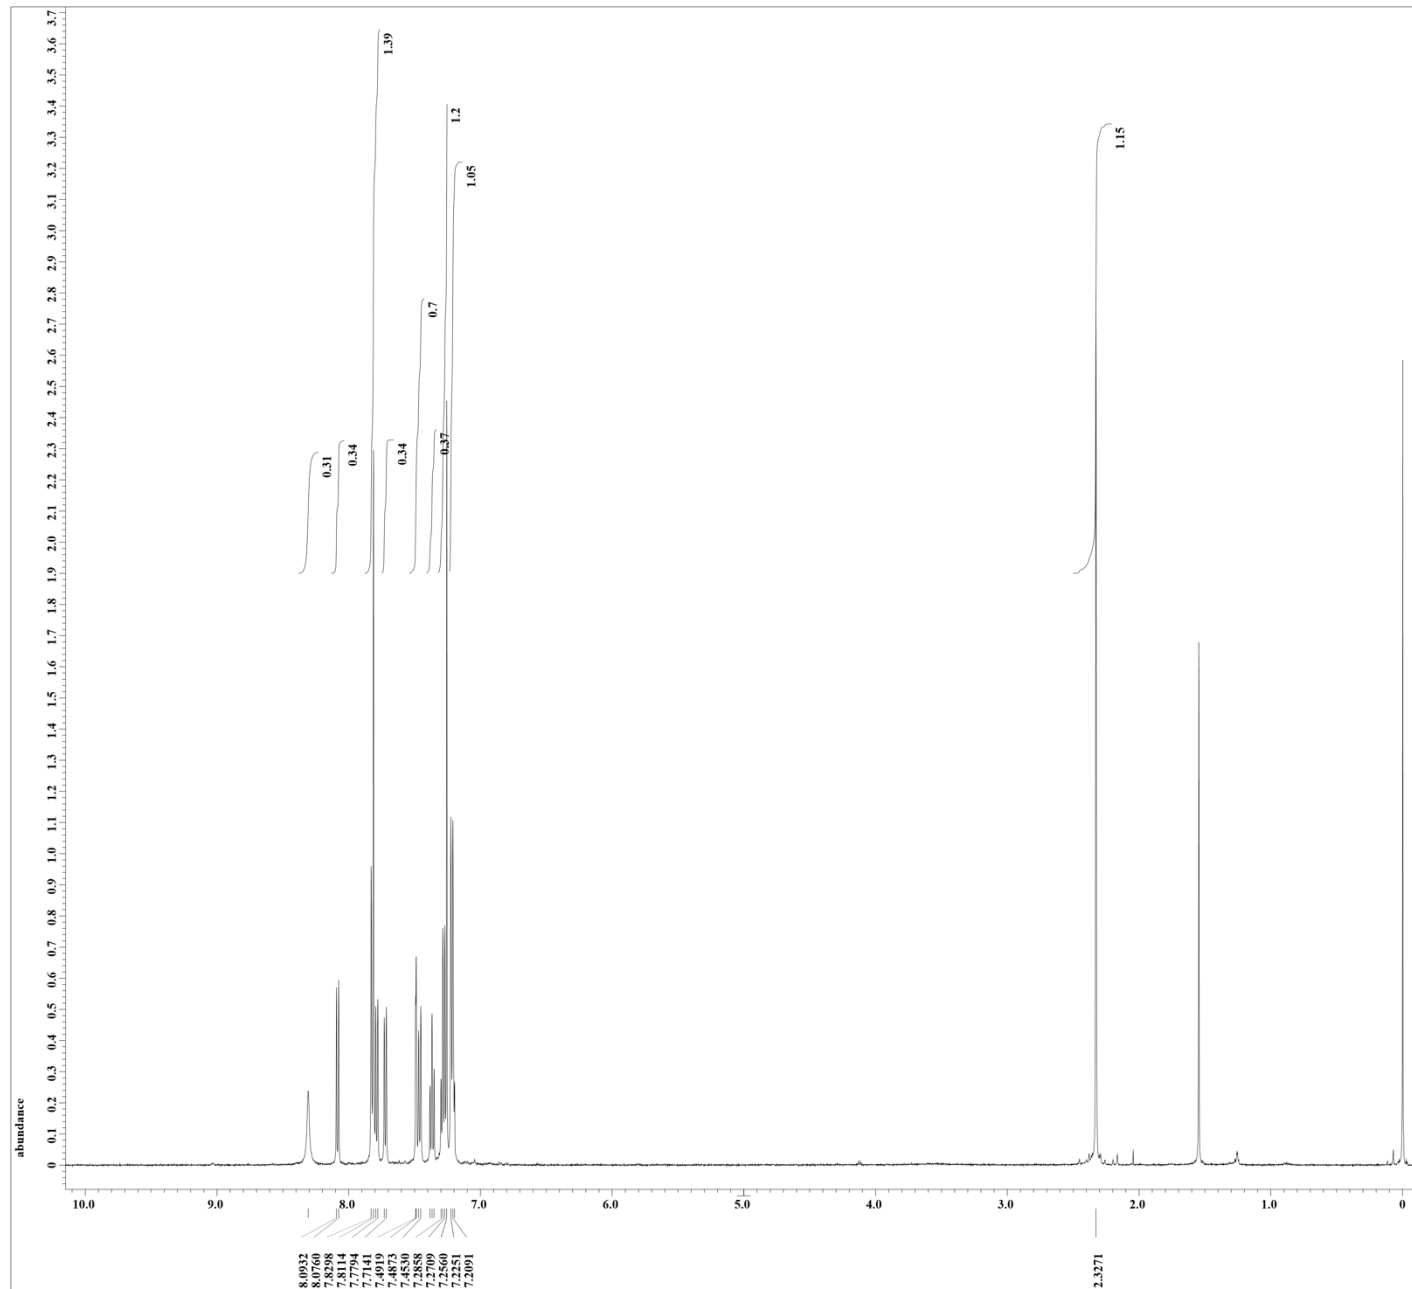

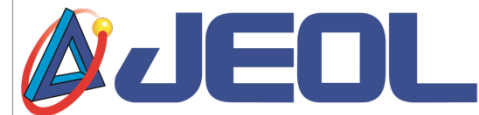

----- PROCESSING PARAMETERS -----  
dc balance : 0 : FALSE  
seXP : 2.0[Hz] : 0.0[s]  
trapezoid3 : 0[%] : 80[%] : 100[%]  
zeroFill : 1  
fft : 1 : TRUE : TRUE  
machinephase  
ppm  
Derived from: TA2019-1231-14.jdf

Filename = TA2019-1231-17.jdf  
Author = delta  
Experiment = single\_pulse\_dec  
Sample\_id = S9635226  
Solvent = CHLOROFORM-D  
Creation time = 18-MAR-2000 14:56:56  
Revision time = 1-FEB-2020 23:42:13  
Current time = 1-FEB-2020 23:42:45  
  
Comment = single pulse decouple  
Data format = 1D COMPLEX  
Dim Title = 26214  
Dim Title = 13C  
Dim units = [ppm]  
Dimensions = X  
Site = ECA500  
Spectrometer = DELTA2 NMR  
  
Field strength = 11.7473579[T] (500[MH  
X\_acq\_duration = 0.83361792[s]  
X\_domain = 13C  
X\_freq = 125.76529768[MHz]  
X\_offset = 100[ppm]  
X\_points = 32768  
X\_prescans = 4  
X\_resolution = 1.19959034[Hz]  
X\_sweep = 39.3081761[kHz]  
Irr\_domain = 1H  
Irr\_freq = 500.15991521[MHz]  
Irr\_offset = 5.0[ppm]  
Clipped = FALSE  
Mod\_return = 1  
Scans = 24757.0  
Total\_scans = 24757.0  
  
X\_90\_width = 12.8[us]  
X\_acq\_time = 0.83361792[s]  
X\_angle = 30[deg]  
X\_atn = 5.3[db]  
X\_pulse = 4.26666667[us]  
Irr\_atn\_dec = 21.09[db]  
Irr\_atn\_noe = 21.09[db]  
Irr\_noise = WALZ  
Decoupling = TRUE  
Initial\_wait = 1[s]  
Noe = TRUE  
Noe\_time = 2[s]  
Recvr\_gain = 56  
Relaxation\_delay = 2[s]  
Repetition\_time = 2.83361792[s]  
Temp\_get = 24.8[dc]

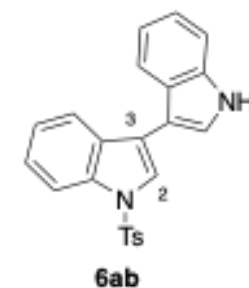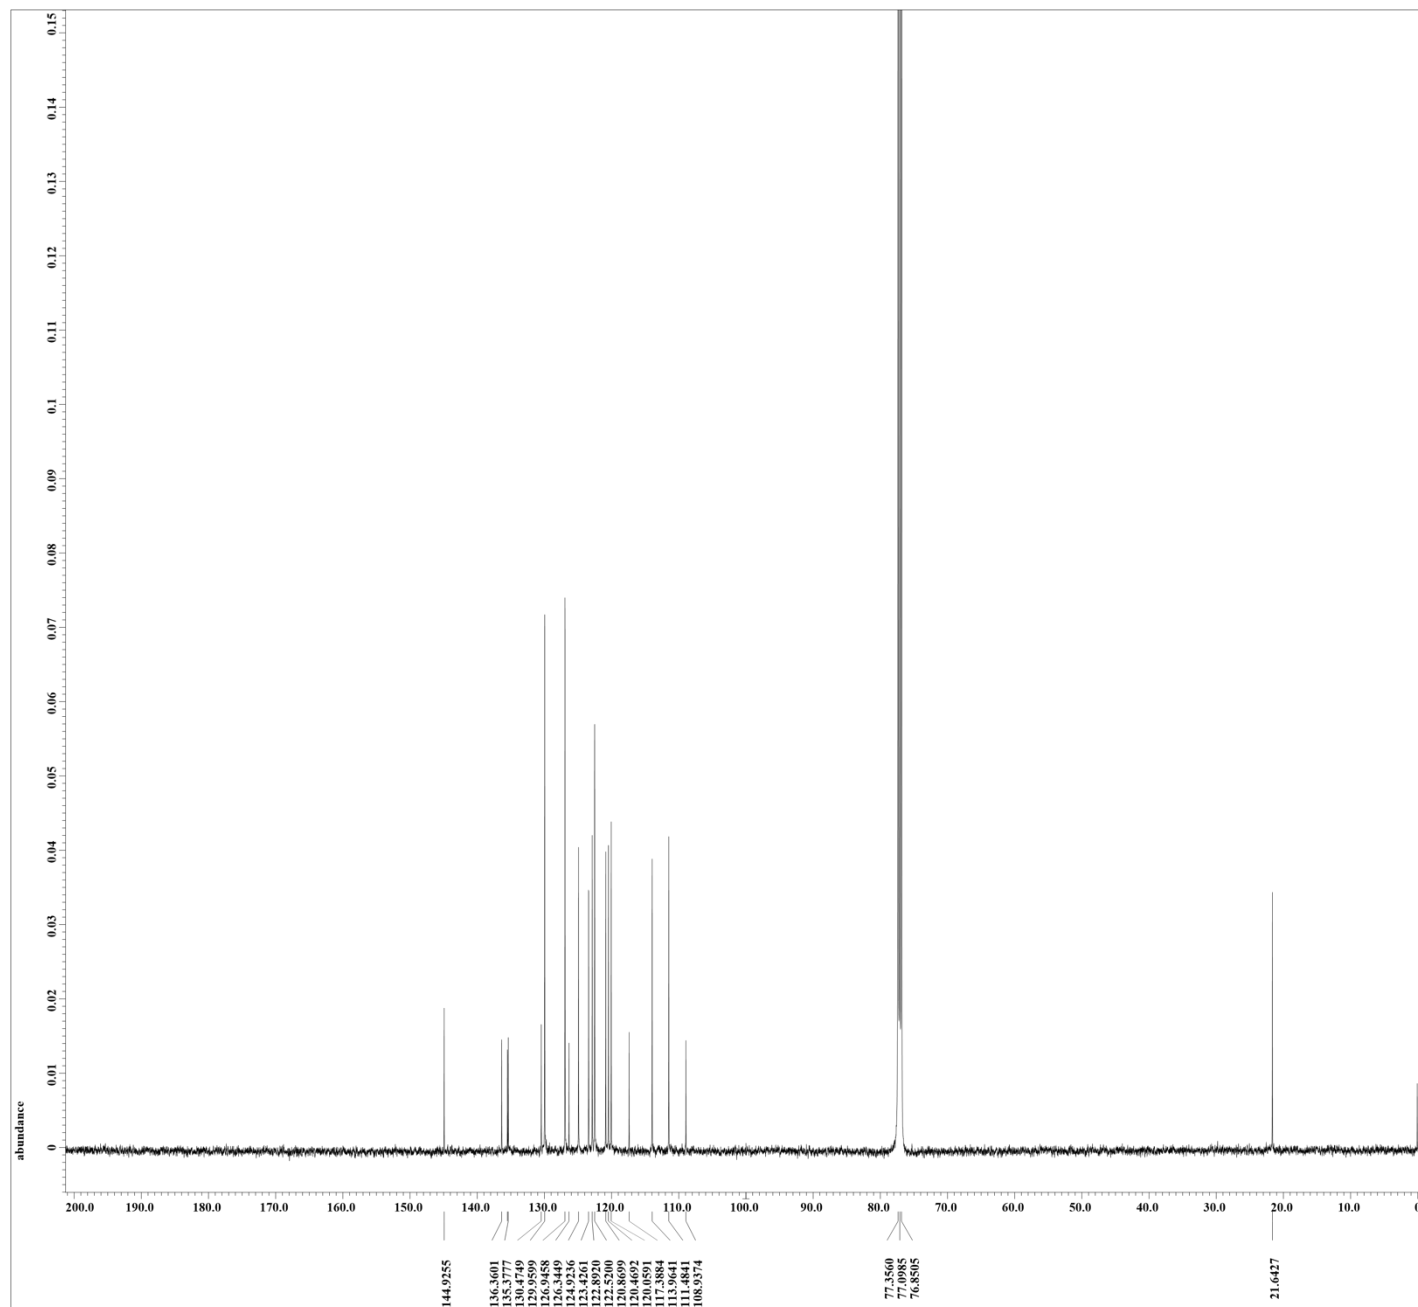



Filename = 7A200128-4.jdf  
 Author = delta  
 Experiment = single\_pulse.ex2  
 Sample\_id = S8701193  
 Solvent = CHLOROFORM-D  
 Creation\_time = 28-JAN-2020 18:35:51  
 Revision\_time = 28-JAN-2020 19:36:00  
 Current\_time = 28-JAN-2020 19:36:48

Content = single\_pulse  
 Data\_format = 1D\_COMPLEX  
 Dim\_size = 13107  
 Dim\_title = 1H  
 Dim\_units = [ppm]  
 Dimensions = X  
 Site = ECA 500  
 Spectrometer = DELTA2\_NMR

Field\_strength = 11.62926421[T] (500[M]  
 X\_acq\_duration = 1.76422912[s]  
 X\_domain = 1H  
 X\_freq = 495.13191398[MHz]  
 X\_offset = 5[ppm]  
 X\_points = 16384  
 X\_prescans = 1  
 X\_resolution = 0.5668198[Hz]  
 X\_sweep = 9.28677563[kHz]  
 Irr\_domain = 1H  
 Irr\_freq = 495.13191398[MHz]  
 Irr\_offset = 5[ppm]  
 Tri\_domain = 1H  
 Tri\_freq = 495.13191398[MHz]  
 Tri\_offset = 5[ppm]  
 Clipped = FALSE  
 Mod\_return = 1  
 Scans = 8  
 Total\_scans = 8

X\_90\_width = 11.3[us]  
 X\_acq\_time = 1.76422912[s]  
 X\_angle = 45[deg]  
 X\_atn = 3.3[db]  
 X\_pulse = 5.65[us]  
 Irr\_mode = Off  
 Tri\_mode = Off  
 Dante\_presat = FALSE  
 Initial\_wait = 1[s]  
 Recvz\_gain = 38  
 Relaxation\_delay = 5[s]  
 Repetition\_time = 6.76422912[s]  
 Temp\_get = 23.4[dc]

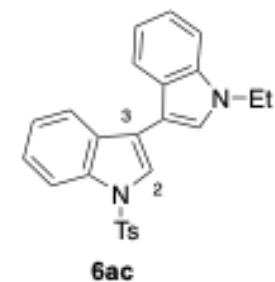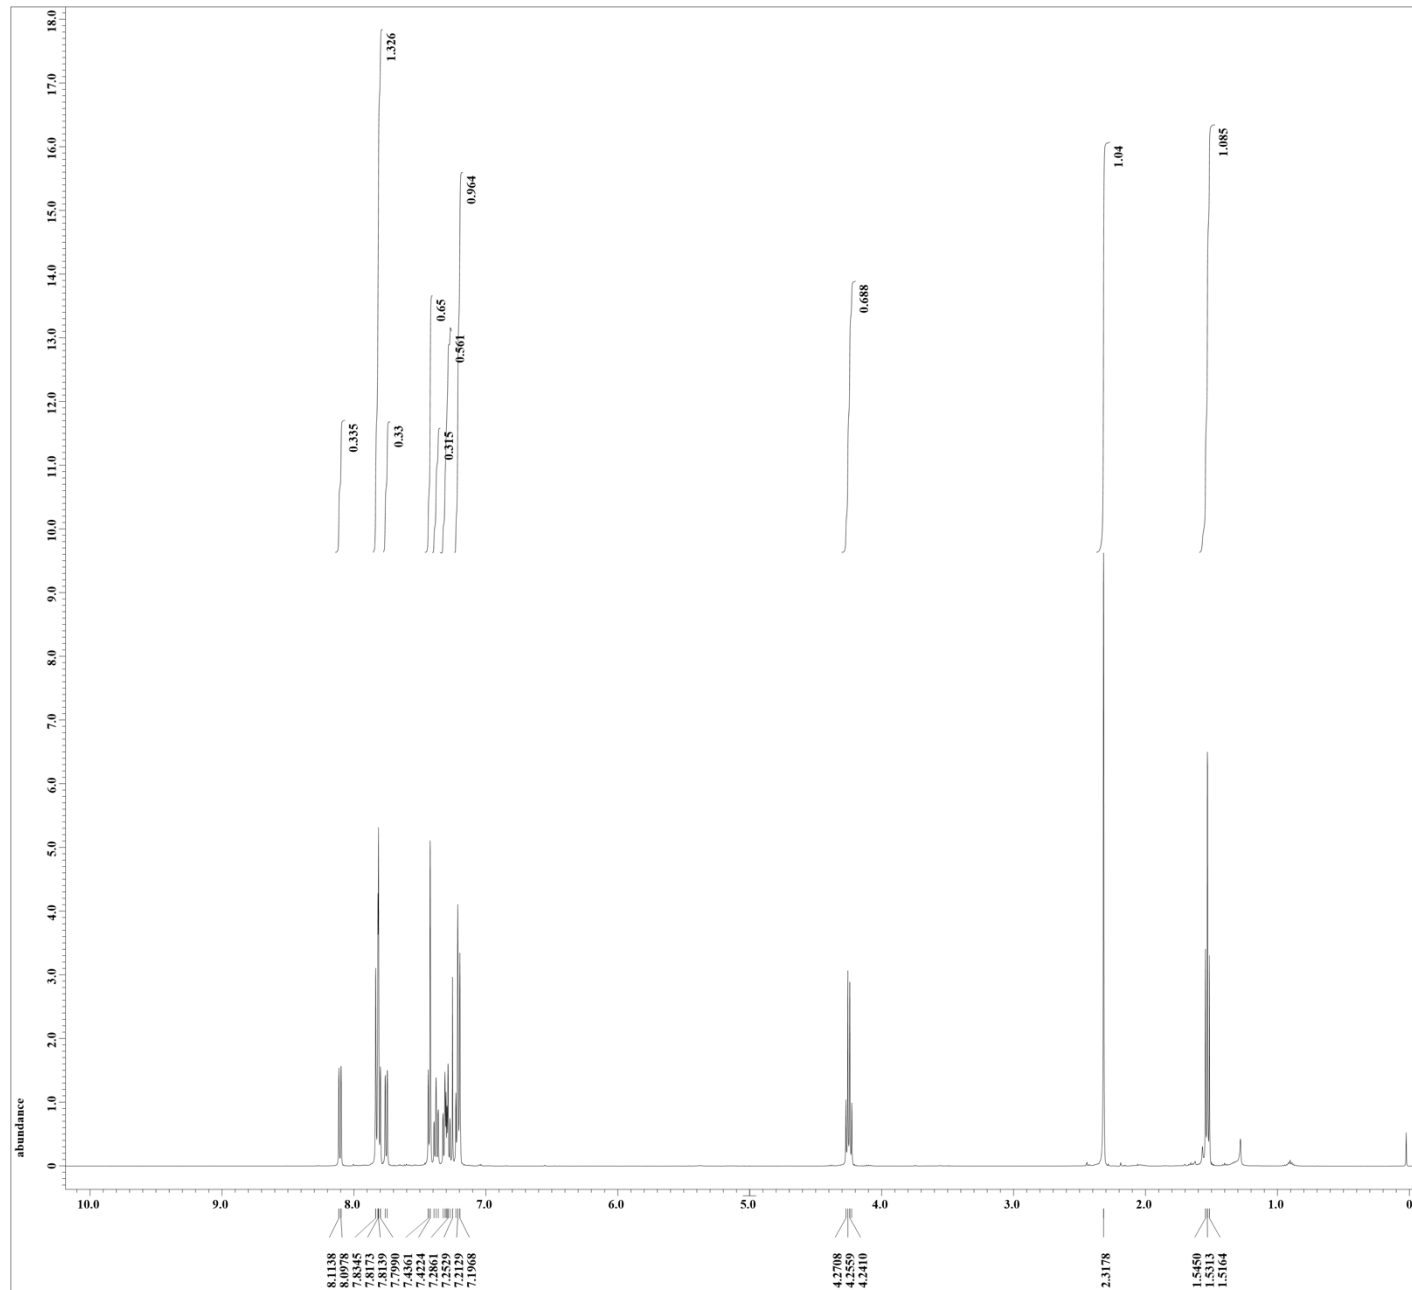

X : parts per Million : 1H



Filename = 7A200128-3.jdf  
 Author = delta  
 Experiment = single\_pulse\_dec  
 Sample\_id = S8703009  
 Solvent = CHLOROFORM-D  
 Creation\_time = 28-JAN-2020 19:30:31  
 Revision\_time = 28-JAN-2020 20:26:17  
 Current\_time = 28-JAN-2020 20:28:37

Content = single\_pulse\_decouple  
 Data\_format = 1D\_COMPLEX  
 Dim\_size = 26214  
 Dim\_title = 13C  
 Dim\_units = [ppm]  
 Dimensions = X  
 Site = ECA 500  
 Spectrometer = DELTA2\_NMR

Field\_strength = 11.62926421[T] (500[M]  
 X\_acq\_duration = 0.8388608[s]  
 X\_domain = 13C  
 X\_freq = 124.5010059[MHz]  
 X\_offset = 100[ppm]  
 X\_points = 32768  
 X\_prescans = 4  
 X\_resolution = 1.1920929[Hz]  
 X\_sweep = 39.0625[kHz]  
 Irr\_domain = 1H  
 Irr\_freq = 495.13191398[MHz]  
 Irr\_offset = 5[ppm]  
 Clipped = FALSE  
 Mod\_return = 1  
 Scans = 1108  
 Total\_scans = 1108

X\_90\_width = 10.1[us]  
 X\_acq\_time = 0.8388608[s]  
 X\_angle = 30[deg]  
 X\_atn = 9.5[dB]  
 X\_pulse = 3.36666667[us]  
 Irr\_atn\_dec = 21.51[dB]  
 Irr\_atn\_noe = 21.51[dB]  
 Irr\_noise = WALTZ  
 Decoupling = TRUE  
 Initial\_wait = 1[s]  
 Noe = TRUE  
 Noe\_time = 2[s]  
 Recvr\_gain = 60  
 Relaxation\_delay = 2[s]  
 Repetition\_time = 2.8388608[s]  
 Temp\_get = 24[dc]

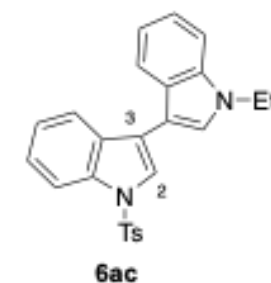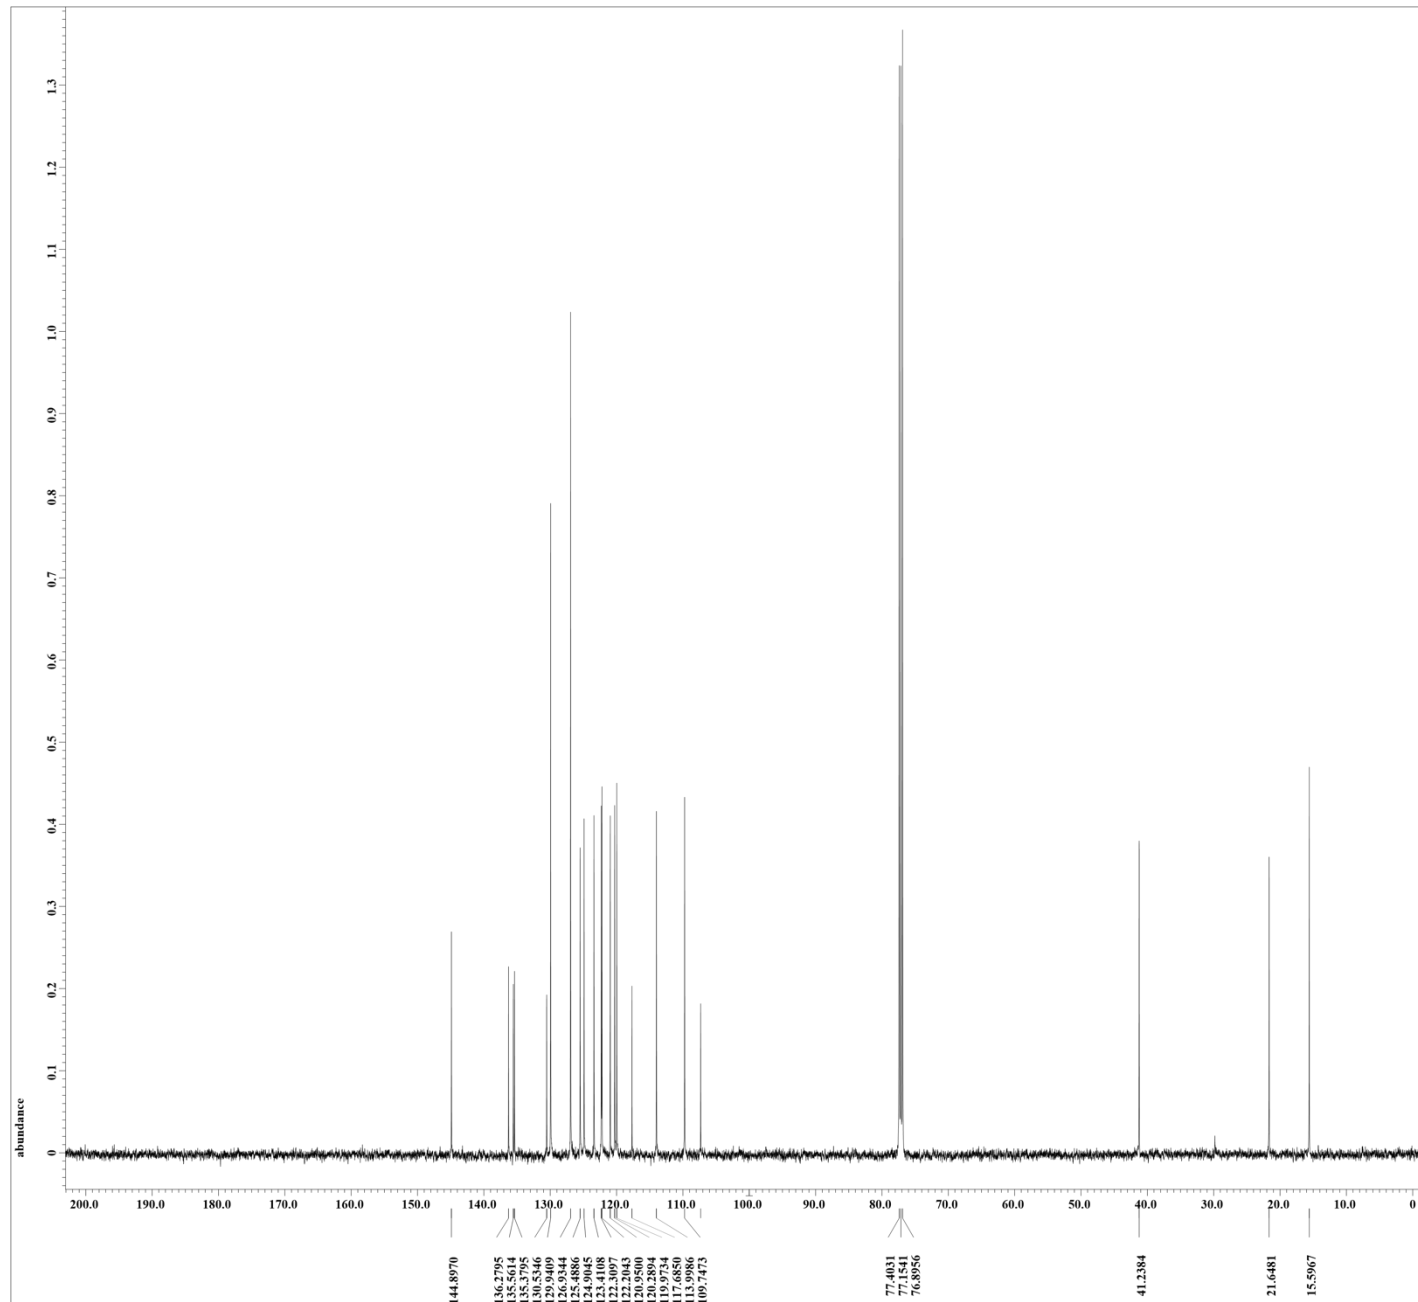

X : parts per Million : 13C

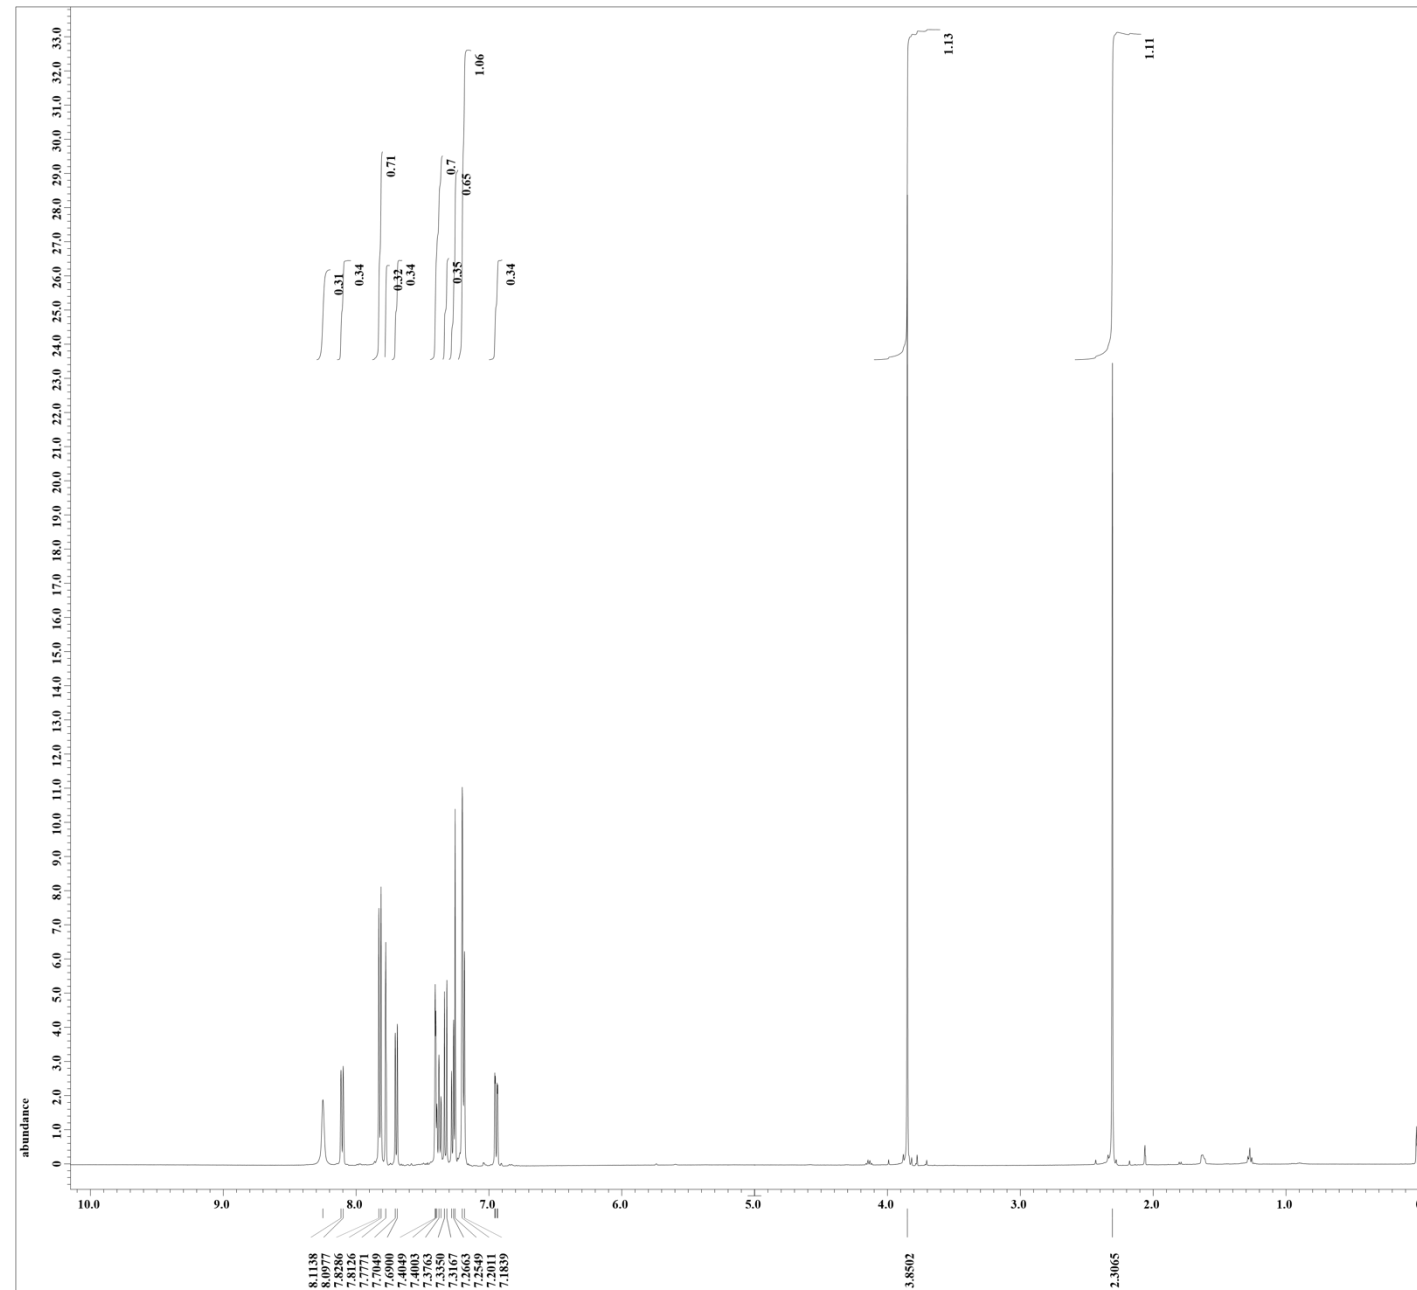

X : parts per Million : 1H

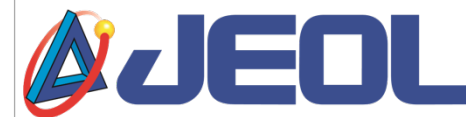

----- PROCESSING PARAMETERS -----  
 dc balance : 0 : FALSE  
 seXp : 0.2[Hz] : 0.0[s]  
 trapezoid3 : 0[%] : 80[%] : 100[%]  
 zeroFill : 1  
 fft : 1 : TRUE : TRUE  
 machinephase  
 ppm  
 Derived from: TA2020-0106-6.jdf

Filename = TA2020-0106-17.jdf  
 Author = delta  
 Experiment = single\_pulse.ex2  
 Sample\_id = S8603947  
 Solvent = CHLOROFORM-D  
 Creation time = 23-MAR-2000 18:35:59  
 Revision time = 1-FEB-2020 18:55:43  
 Current time = 1-FEB-2020 18:56:05  
 Comment = single\_pulse  
 Data format = 1D COMPLEX  
 Dim Time = 13107  
 Dim Title = 1H  
 Dim Units = [ppm]  
 Dimensions = X  
 Site = ECA500  
 Spectrometer = DELTA2 NMR  
 Field strength = 11.7473579[T] (500[MH]  
 X\_acq\_duration = 1.74587904[s]  
 X\_domain = 1H  
 X\_freq = 500.15991521[MHz]  
 X\_offset = 5.0[ppm]  
 X\_points = 16384  
 X\_prescans = 1  
 X\_resolution = 0.57277737[Hz]  
 X\_sweep = 9.38438438[kHz]  
 Irr\_domain = 1H  
 Irr\_freq = 500.15991521[MHz]  
 Irr\_offset = 5.0[ppm]  
 Tri\_domain = 1H  
 Tri\_freq = 500.15991521[MHz]  
 Tri\_offset = 5.0[ppm]  
 Clipped = TRUE  
 Mod return = 1  
 Scans = 8  
 Total\_scans = 8  
 X\_90\_width = 12[us]  
 X\_acq time = 1.74587904[s]  
 X\_angle = 45[deg]  
 X\_atn = 3.4[dB]  
 X\_pulse = 6[us]  
 Irr\_mode = Off  
 Tri\_mode = Off  
 Dante\_preset = FALSE  
 Initial wait = 1[s]  
 Recvr\_gain = 50  
 Relaxation\_delay = 5[s]  
 Repetition\_time = 6.74587904[s]  
 Temp\_get = 23.5[dc]

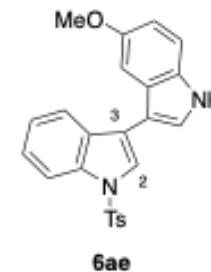



----- PROCESSING PARAMETERS -----  
dc balance : 0 : FALSE  
sexp : 2.0[Hz] : 0.0[s]  
trapezoid3 : 0[%] : 80[%] : 100[%]  
zerofill : 1  
fft : 1 : TRUE : TRUE  
machinephase  
ppm  
Derived from: TA2020-0106-14.jdf

Filename = TA2020-0106-18.jdf  
Author = delta  
Experiment = single pulse dec  
Sample\_id = S8731659  
Solvent = CHLOROFORM-D  
Creation time = 24-MAR-2000 09:54:49  
Revision time = 1-FEB-2020 18:51:11  
Current time = 1-FEB-2020 18:51:48  
  
Comment = single pulse decouple  
Data format = 1D COMPLEX  
Dim Time = 26214  
Dim\_title = 13C  
Dim\_units = [ppm]  
Dimensions = X  
Site = ECA500  
Spectrometer = DELTA2 NMR  
  
Field\_strength = 11.7473579[T] (500[MH  
X\_acq\_duration = 0.83361792[s]  
X\_domain = 13C  
X\_freq = 125.76529768[MHz]  
X\_offset = 100[ppm]  
X\_points = 32768  
X\_prescans = 4  
X\_resolution = 1.19959034[Hz]  
X\_sweep = 39.3081761[kHz]  
Irr\_domain = 1H  
Irr\_freq = 500.15991521[MHz]  
Irr\_offset = 5.0[ppm]  
Clipped = FALSE  
Mod\_return = 1  
Scans = 14959  
Total\_scans = 14959  
  
X\_90\_width = 12.8[us]  
X\_acq\_time = 0.83361792[s]  
X\_angle = 30[deg]  
X\_atn = 5.3[db]  
X\_pulse = 4.26666667[us]  
Irr\_atn\_dec = 21.09[db]  
Irr\_atn\_noe = 21.09[db]  
Irr\_noise = WALZ  
Decoupling = TRUE  
Initial\_wait = 1[s]  
Noe = TRUE  
Noe\_time = 2[s]  
Recvr\_gain = 56  
Relaxation\_delay = 2[s]  
Repetition\_time = 2.83361792[s]  
Temp\_get = 23.9[dc]

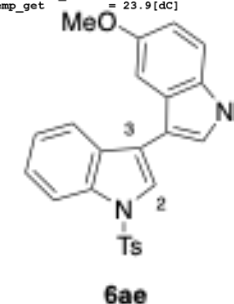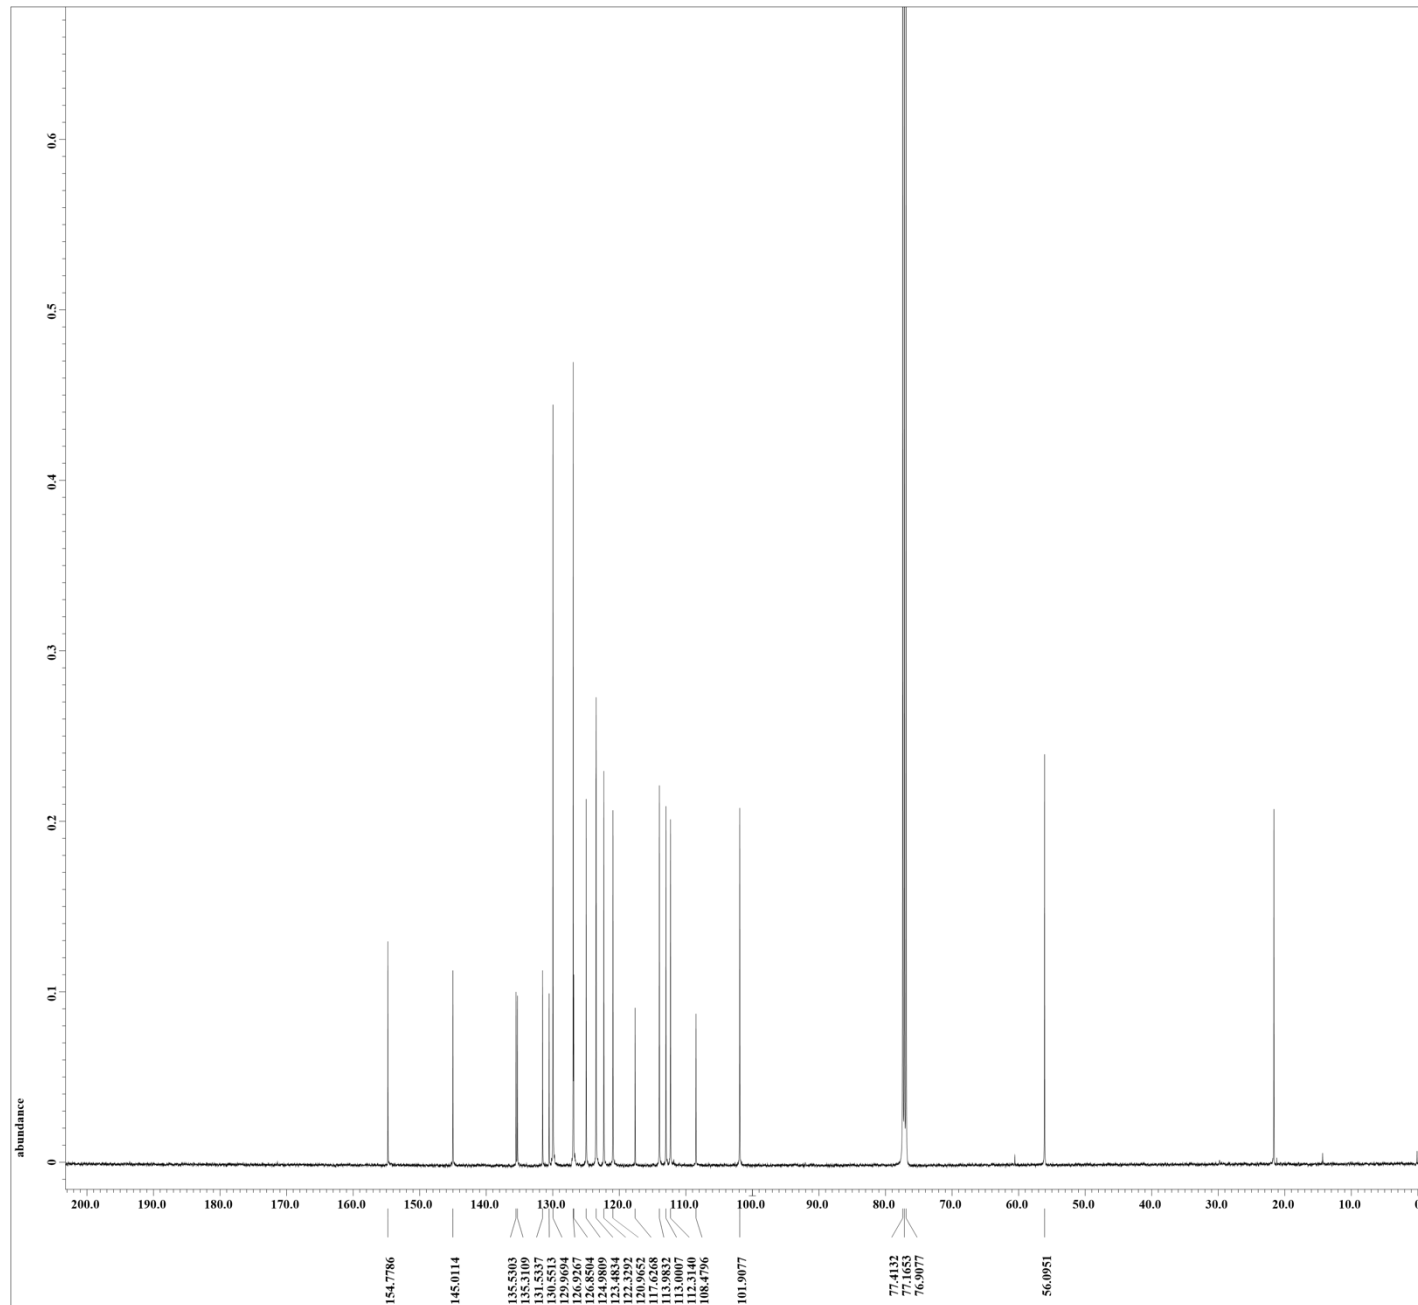





----- PROCESSING PARAMETERS -----  
 dc balance : 0 : FALSE  
 seXp : 0.2[Hz] : 0.0[s]  
 trapezoid3 : 0[%] : 80[%]  
 zeroFill : 1  
 fft : 1 : TRUE : TRUE  
 machinephase  
 ppm  
 Derived from: TA2020-0102-1.jdf

Filename = TA2020-0102-9.jdf  
 Author = delta  
 Experiment = single\_pulse.ex2  
 Sample\_id = S8721749  
 Solvent = CHLOROFORM-D  
 Creation time = 18-MAR-2000 21:52:23  
 Revision time = 1-FEB-2020 23:36:07  
 Current time = 1-FEB-2020 23:36:31  
 Comment = single\_pulse  
 Data format = 1D COMPLEX  
 Dim\_Time = 13107  
 Dim\_title = 1H  
 Dim\_units = [ppm]  
 Dimensions = X  
 Site = ECA500  
 Spectrometer = DELTA2 NMR  
 Field\_strength = 11.7473579[T] (500[MH  
 X\_acq\_duration = 1.74587904[s]  
 X\_domain = 1H  
 X\_freq = 500.15991521[MHz]  
 X\_offset = 5.0[ppm]  
 X\_points = 16384  
 X\_prescans = 1  
 X\_resolution = 0.57277737[Hz]  
 X\_sweep = 9.38438438[kHz]  
 Irr\_domain = 1H  
 Irr\_freq = 500.15991521[MHz]  
 Irr\_offset = 5.0[ppm]  
 Tri\_domain = 1H  
 Tri\_freq = 500.15991521[MHz]  
 Tri\_offset = 5.0[ppm]  
 Clipped = FALSE  
 Mod\_return = 1  
 Scans = 8  
 Total\_scans = 8  
 X\_90\_width = 12[us]  
 X\_acq\_time = 1.74587904[s]  
 X\_angle = 45[deg]  
 X\_atn = 3.4[db]  
 X\_pulse = 6[us]  
 Irr\_mode = Off  
 Tri\_mode = Off  
 Dante\_presat = FALSE  
 Initial\_wait = 1[s]  
 Recvr\_gain = 50  
 Relaxation\_delay = 5[s]  
 Repetition\_time = 6.74587904[s]  
 Temp\_get = 23.9[dc]

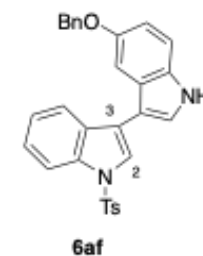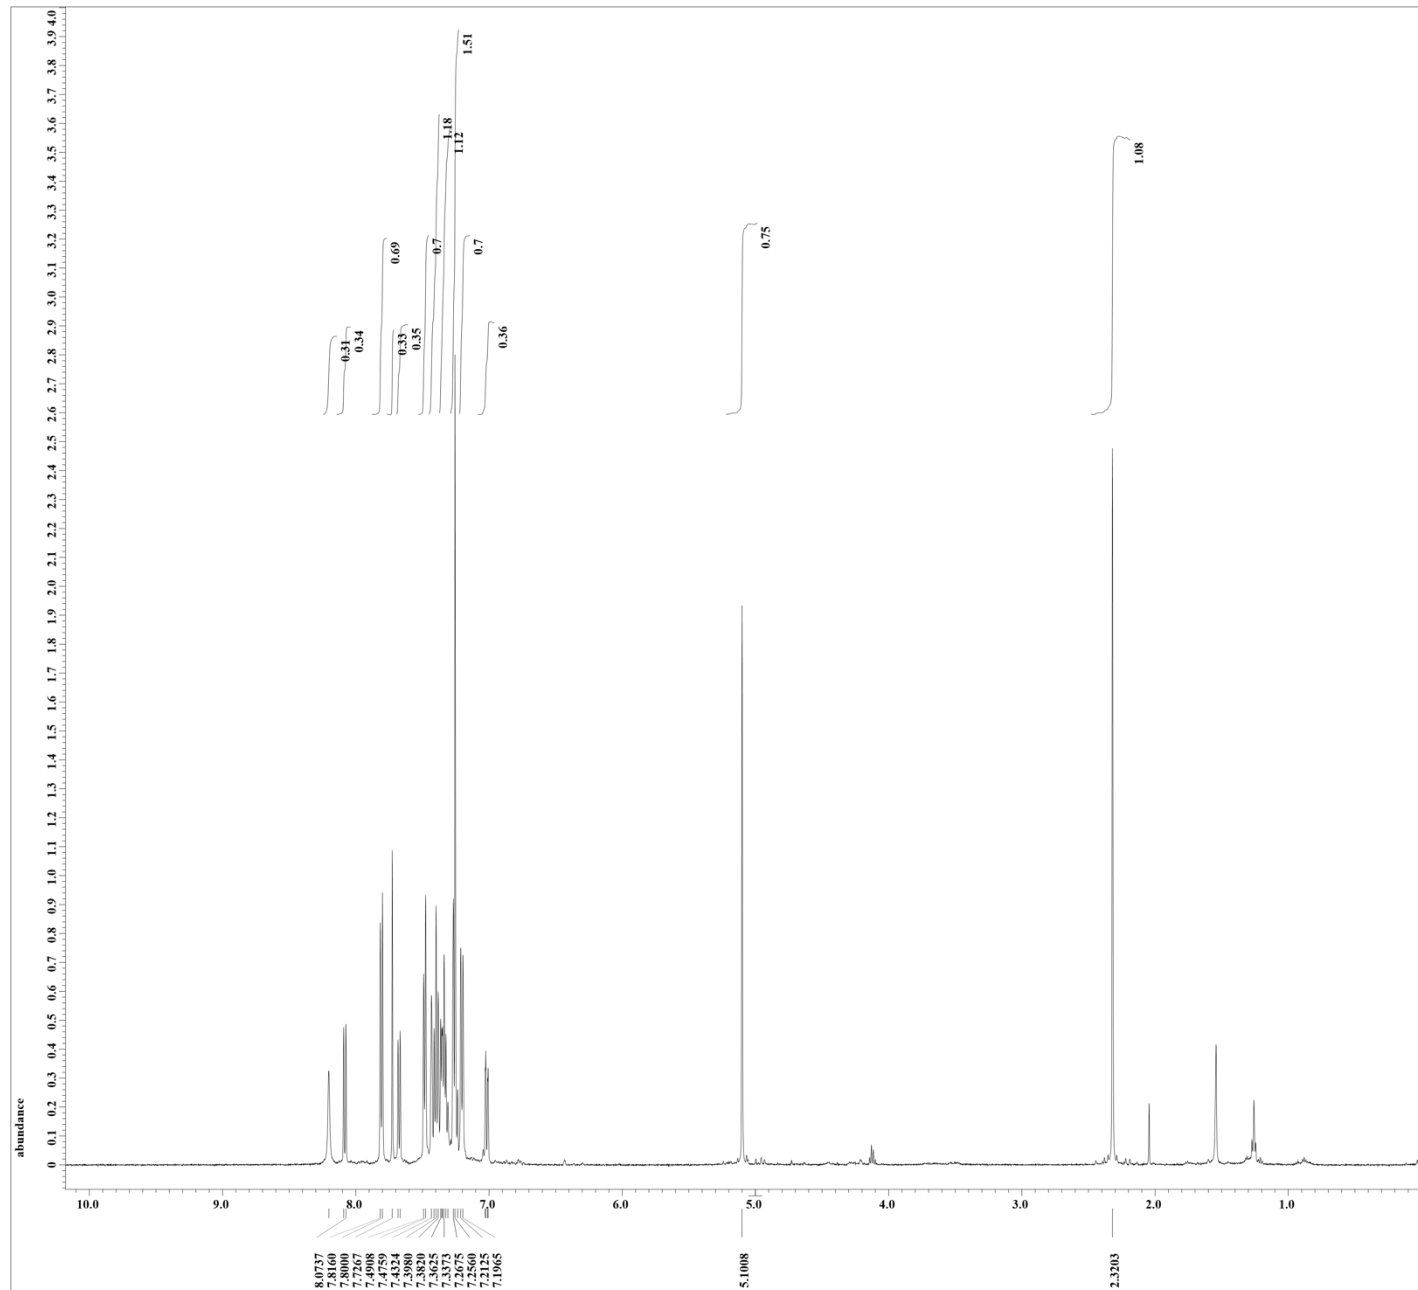

X : parts per Million : 1H



----- PROCESSING PARAMETERS -----  
 dc balance : 0 : FALSE  
 seXp : 2.0[Hz] : 0.0[s]  
 trapezoid3 : 0[%] : 80[%] : 100[%]  
 zeroFill : 1  
 fft : 1 : TRUE : TRUE  
 machinephase  
 ppm  
 Derived from: TA2020-0102-2.jdf

Filename = TA2020-0102-8.jdf  
 Author = delta  
 Experiment = single pulse dec  
 Sample\_id = S872251  
 Solvent = CHLOROFORM-D  
 Creation time = 19-MAR-2000 13:02:20  
 Revision time = 1-FEB-2020 23:31:22  
 Current time = 1-FEB-2020 23:32:10  
 Comment = single pulse decouple  
 Data format = 1D COMPLEX  
 Dim title = 26214  
 Dim title = 13C  
 Dim units = [ppm]  
 Dimensions = X  
 Site = ECA500  
 Spectrometer = DELTA2 NMR  
 Field strength = 11.7473579[T] (500[MH  
 X\_acq\_duration = 0.83361792[s]  
 X\_domain = 13C  
 X\_freq = 125.76529768[MHz]  
 X\_offset = 100[ppm]  
 X\_points = 32768  
 X\_prescans = 4  
 X\_resolution = 1.19959034[Hz]  
 X\_sweep = 39.3081761[kHz]  
 Irr\_domain = 1H  
 Irr\_freq = 500.15991521[MHz]  
 Irr\_offset = 5.0[ppm]  
 Clipped = TRUE  
 Mod\_return = 1  
 Scans = 19250  
 Total\_scans = 19250  
 X\_90\_width = 12.8[us]  
 X\_acq\_time = 0.83361792[s]  
 X\_angle = 30[deg]  
 X\_atn = 5.3[db]  
 X\_pulse = 4.26666667[us]  
 Irr\_atn\_dec = 21.09[db]  
 Irr\_atn\_noe = 21.09[db]  
 Irr\_noise = WALZ  
 Decoupling = TRUE  
 Initial\_wait = 1[s]  
 Noe = TRUE  
 Noe\_time = 2[s]  
 Recvr\_gain = 60  
 Relaxation\_delay = 2[s]  
 Repetition\_time = 2.83361792[s]  
 Temp\_get = 24.9[dc]

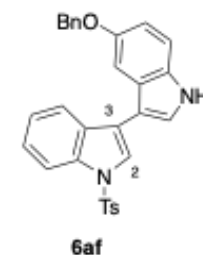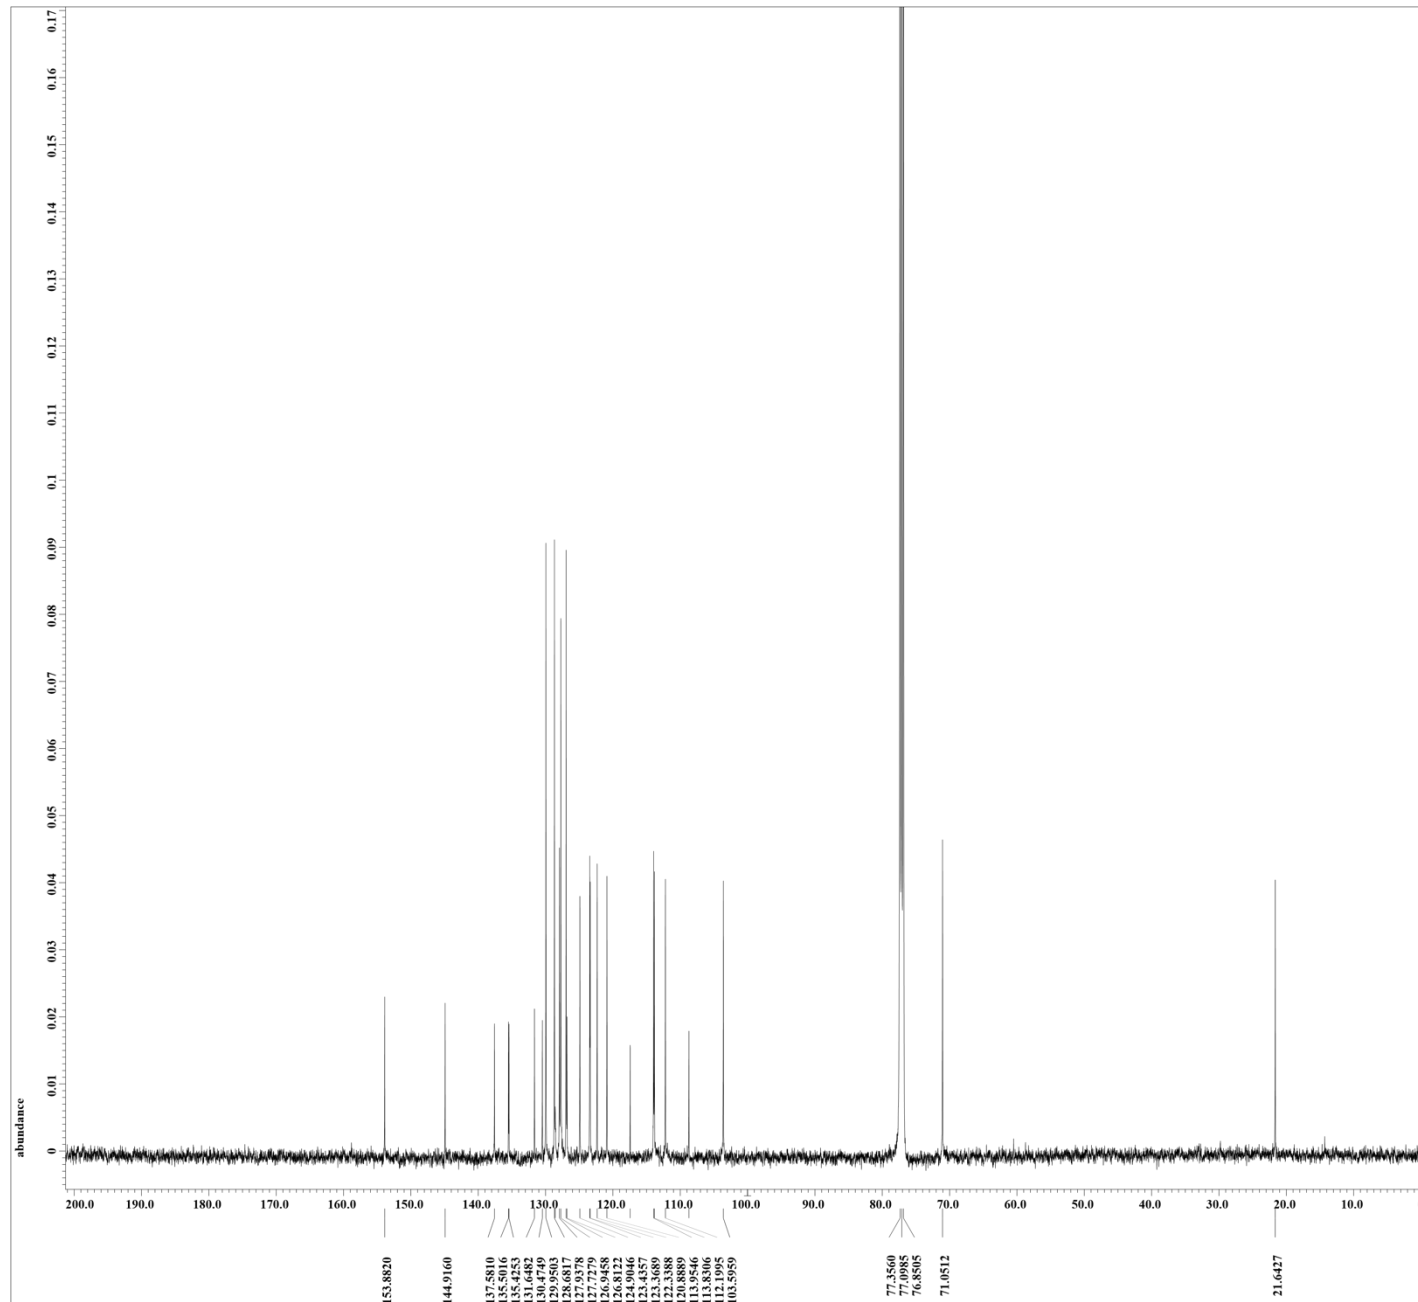



Filename = 7A200103-6.jdf  
 Author = delta  
 Experiment = single\_pulse.ex2  
 Sample\_id = S8421477  
 Solvent = CHLOROFORM-D  
 Creation\_time = 3-JAN-2020 10:53:25  
 Revision\_time = 1-FEB-2020 18:21:46  
 Current\_time = 1-FEB-2020 18:22:26

Content = single\_pulse  
 Data format = 1D COMPLEX  
 Dim\_size = 13107  
 Dim\_title = 1H  
 Dim\_units = [ppm]  
 Dimensions = X  
 Site = ECA 500  
 Spectrometer = DELTA2\_NMR

Field\_strength = 11.62926421[T] (500[M]  
 X\_acq\_duration = 1.76422912[s]  
 X\_domain = 1H  
 X\_freq = 495.13191398[MHz]  
 X\_offset = 5[ppm]  
 X\_points = 16384  
 X\_prescans = 1  
 X\_resolution = 0.5668198[Hz]  
 X\_sweep = 9.28677563[kHz]  
 Irr\_domain = 1H  
 Irr\_freq = 495.13191398[MHz]  
 Irr\_offset = 5[ppm]  
 Tri\_domain = 1H  
 Tri\_freq = 495.13191398[MHz]  
 Tri\_offset = 5[ppm]  
 Clipped = FALSE  
 Mod\_return = 1  
 Scans = 8  
 Total\_scans = 8

X\_90\_width = 11.3[us]  
 X\_acq\_time = 1.76422912[s]  
 X\_angle = 45[deg]  
 X\_atn = 3.3[db]  
 X\_pulse = 5.65[us]  
 Irr\_mode = Off  
 Tri\_mode = Off  
 Dante\_presat = FALSE  
 Initial\_wait = 1[s]  
 Recv\_gain = 48  
 Relaxation\_delay = 5[s]  
 Repetition\_time = 6.76422912[s]  
 Temp\_get = 22.8[dc]

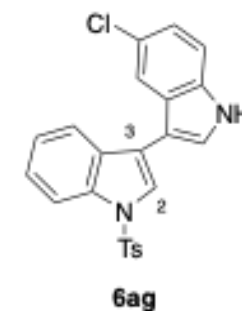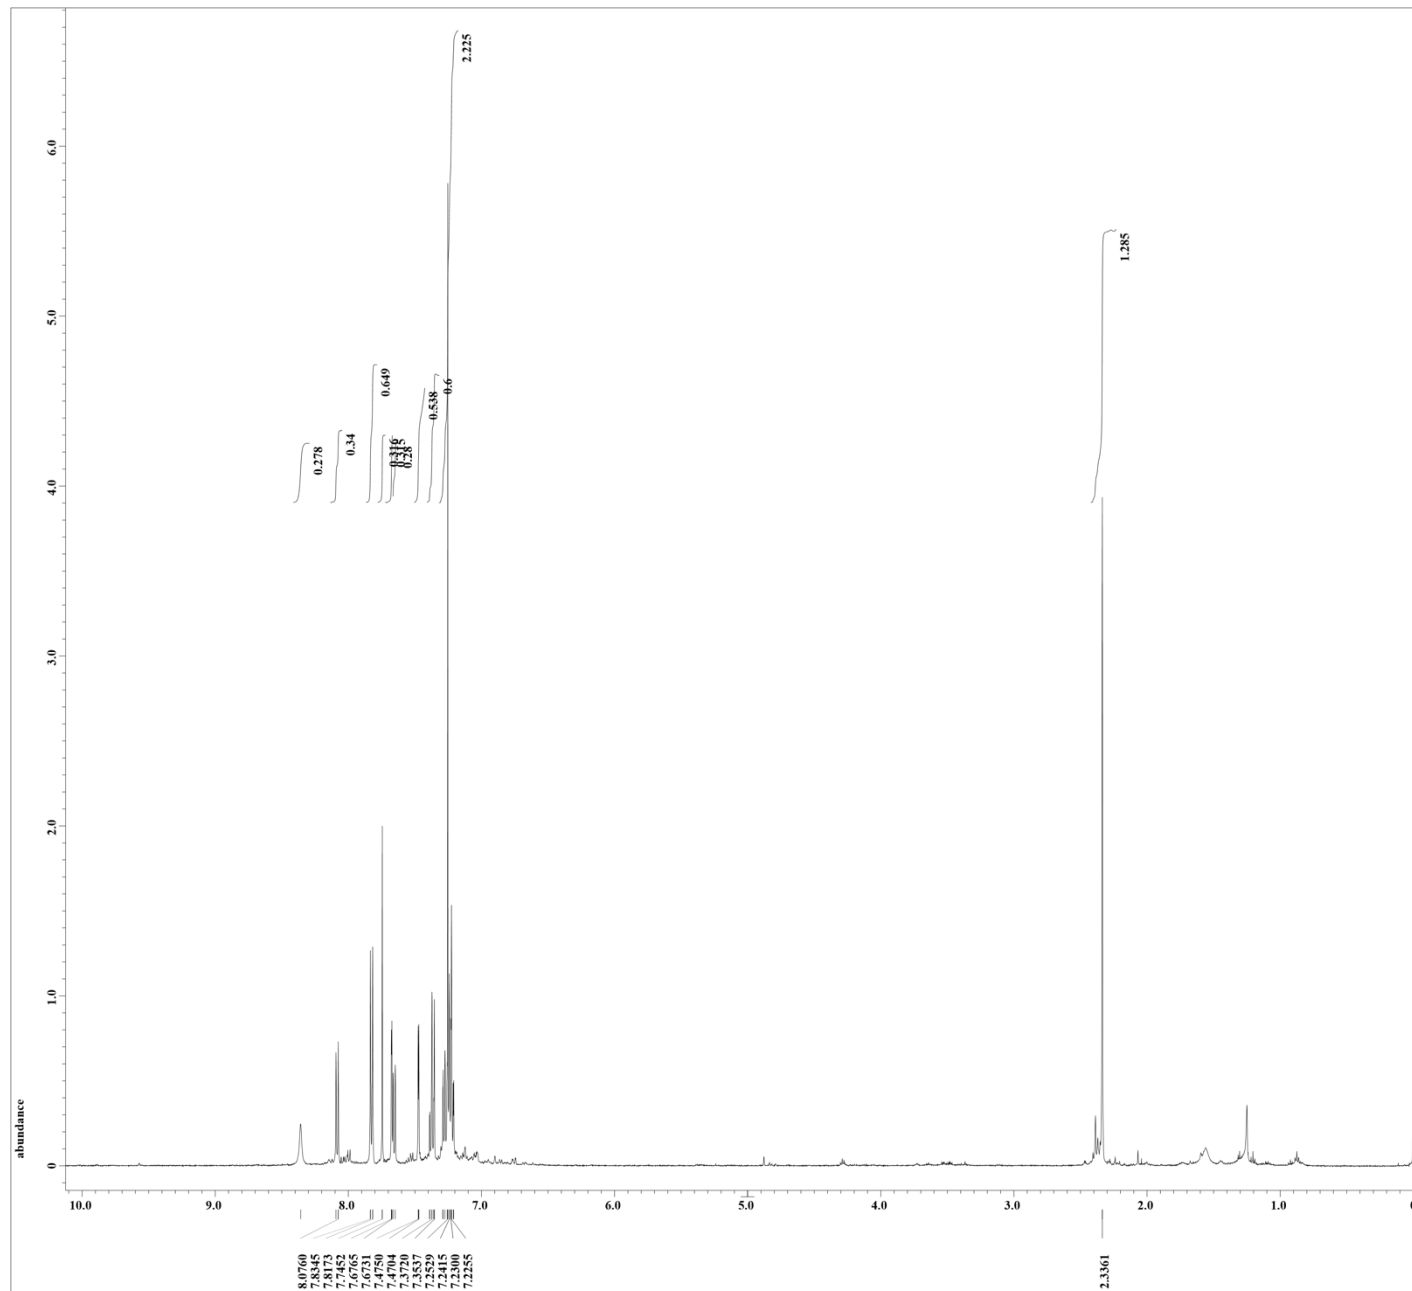

X : parts per Million : 1H



Filename = 7A200103-4.jdf  
 Author = delta  
 Experiment = single\_pulse\_dec  
 Sample\_id = S8422774  
 Solvent = CHLOROFORM-D  
 Creation\_time = 6-JAN-2020 07:22:18  
 Revision\_time = 1-FEB-2020 18:23:43  
 Current\_Time = 1-FEB-2020 18:24:12

Content = single pulse decouple  
 Data format = 1D COMPLEX  
 Dim\_size = 26214  
 Dim\_title = 13C  
 Dim\_units = [ppm]  
 Dimensions = X  
 Site = ECA 500  
 Spectrometer = DELTA2\_NMR

Field\_strength = 11.62926421[T] (500[M]  
 X\_acq\_duration = 0.8388608[s]  
 X\_domain = 13C  
 X\_freq = 124.5010059[MHz]  
 X\_offset = 100[ppm]  
 X\_points = 32768  
 X\_prescans = 4  
 X\_resolution = 1.1920929[Hz]  
 X\_sweep = 39.0625[kHz]  
 Irr\_domain = 1H  
 Irr\_freq = 495.13191398[MHz]  
 Irr\_offset = 5[ppm]  
 Clipped = TRUE  
 Mod\_return = 1  
 Scans = 86811  
 Total\_scans = 86811

X\_90\_width = 10.1[us]  
 X\_acq\_time = 0.8388608[s]  
 X\_angle = 30[deg]  
 X\_atn = 9.5[dB]  
 X\_pulse = 3.36666667[us]  
 Irr\_atn\_dec = 21.51[dB]  
 Irr\_atn\_noe = 21.51[dB]  
 Irr\_noise = WALTZ  
 Decoupling = TRUE  
 Initial\_wait = 1[s]  
 Noe = TRUE  
 Noe\_time = 2[s]  
 Recvr\_gain = 60  
 Relaxation\_delay = 2[s]  
 Repetition\_time = 2.8388608[s]  
 Temp\_get = 23.5[dc]

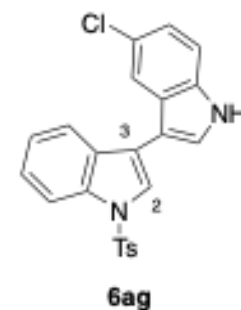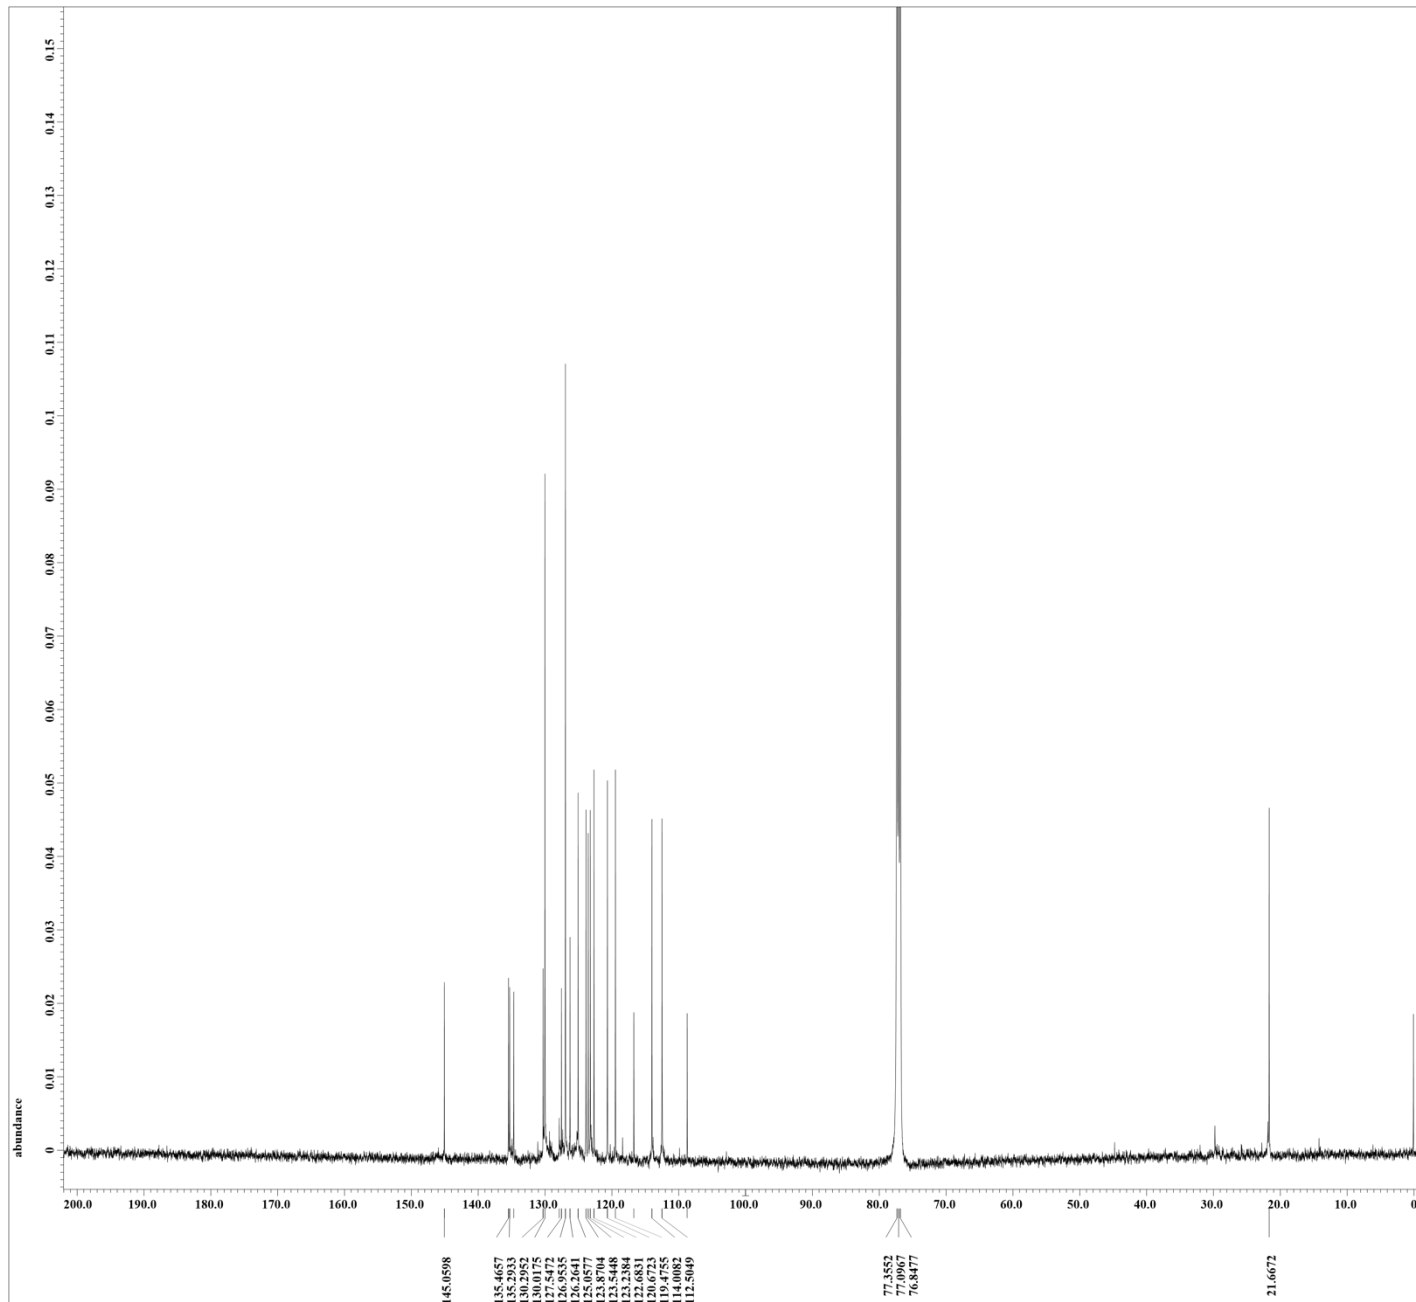



Filename = 7A200109-21.jdf  
 Author = delta  
 Experiment = single\_pulse.ex2  
 Sample\_id = S8489122  
 Solvent = CHLOROFORM-D  
 Creation\_time = 9-JAN-2020 12:45:35  
 Revision\_time = 1-FEB-2020 18:31:14  
 Current\_time = 1-FEB-2020 18:31:38

Content = single\_pulse  
 Data\_format = 1D\_COMPLEX  
 Dim\_size = 13107  
 Dim\_title = 1H  
 Dim\_units = [ppm]  
 Dimensions = X  
 Site = ECA 500  
 Spectrometer = DELTA2\_NMR

Field\_strength = 11.62926421[T] (500[M]  
 X\_acq\_duration = 1.76422912[s]  
 X\_domain = 1H  
 X\_freq = 495.13191398[MHz]  
 X\_offset = 5[ppm]  
 X\_points = 16384  
 X\_prescans = 1  
 X\_resolution = 0.5668198[Hz]  
 X\_sweep = 9.28677563[kHz]  
 Irr\_domain = 1H  
 Irr\_freq = 495.13191398[MHz]  
 Irr\_offset = 5[ppm]  
 Tri\_domain = 1H  
 Tri\_freq = 495.13191398[MHz]  
 Tri\_offset = 5[ppm]  
 Clipped = FALSE  
 Mod\_return = 1  
 Scans = 8  
 Total\_scans = 8

X\_90\_width = 11.3[us]  
 X\_acq\_time = 1.76422912[s]  
 X\_angle = 45[deg]  
 X\_atn = 3.3[db]  
 X\_pulse = 5.65[us]  
 Irr\_mode = Off  
 Tri\_mode = Off  
 Dante\_presat = FALSE  
 Initial\_wait = 1[s]  
 Recvz\_gain = 46  
 Relaxation\_delay = 5[s]  
 Repetition\_time = 6.76422912[s]  
 Temp\_get = 23.6[dc]

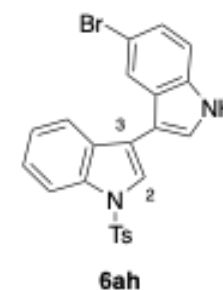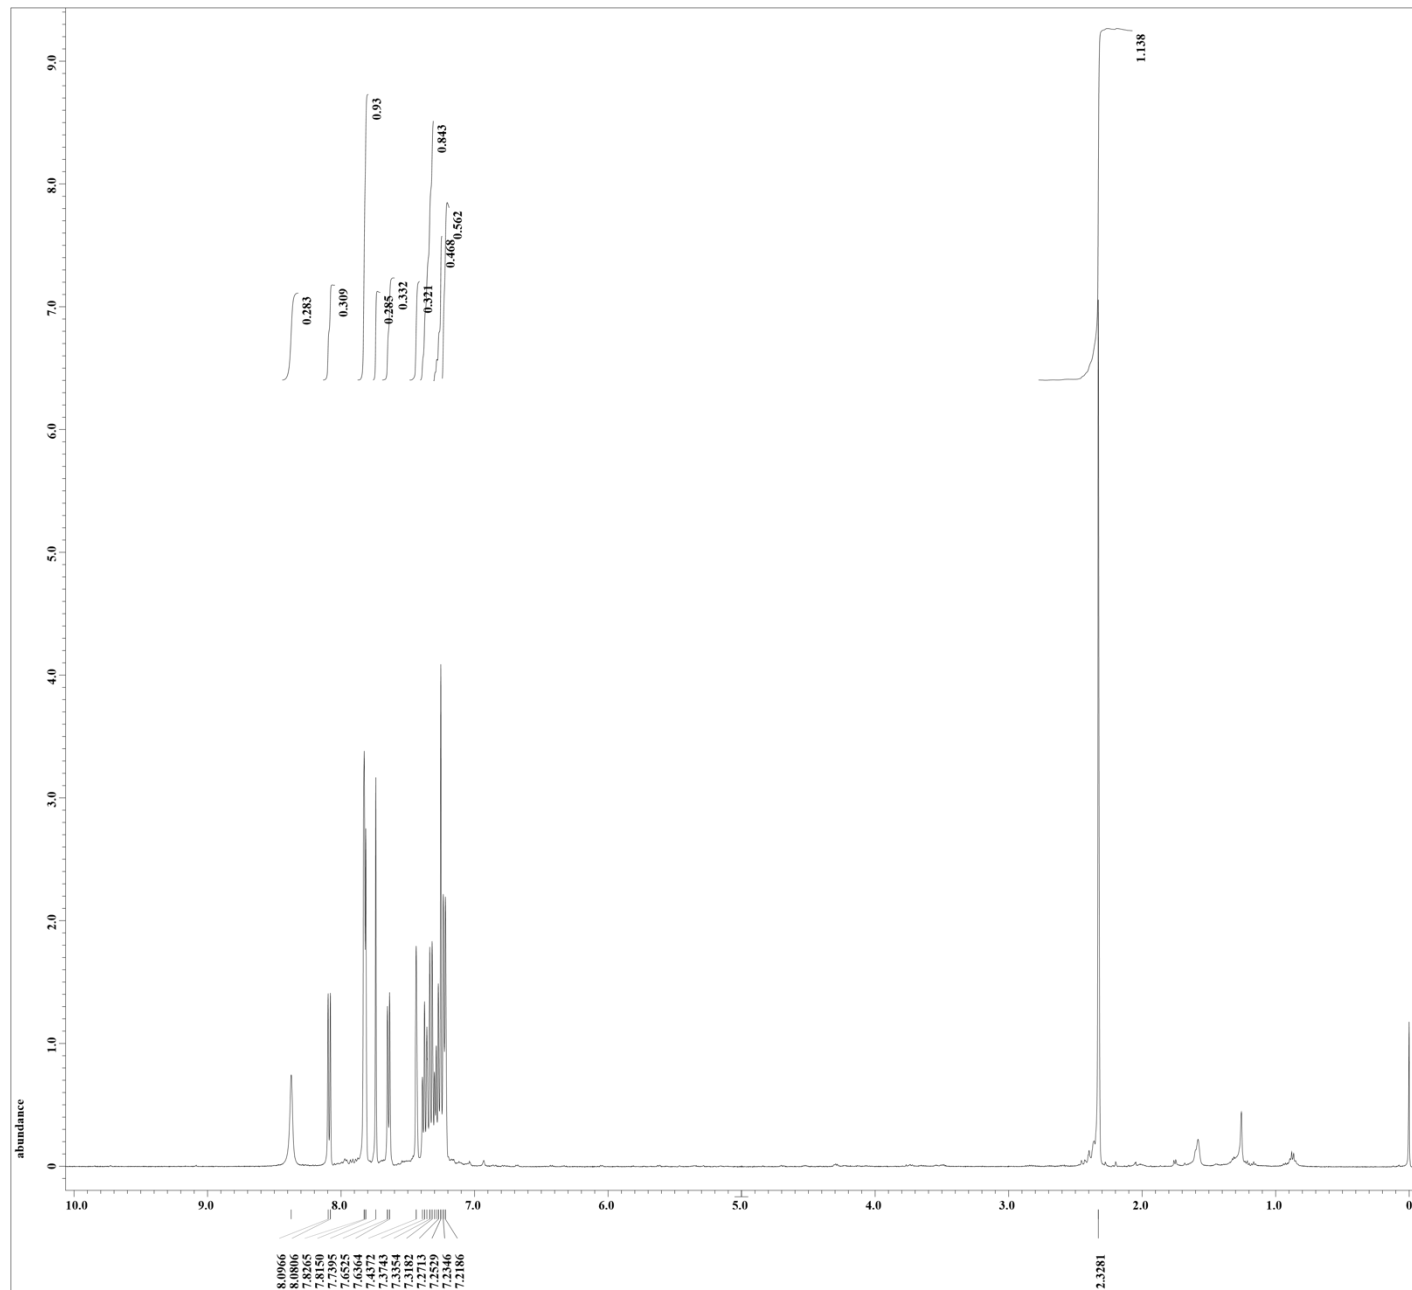

X : parts per Million : 1H



```

Filename      = 7A200109-19.jdf
Author       = delta
Experiment   = single_pulse_dec
Sample_id    = S#653477
Solvent      = CHLOROFORM-D
Creation_time = 10-JAN-2020 08:12:59
Revision_time = 1-FEB-2020 18:31:57
Current_Time = 1-FEB-2020 18:32:26

Content      = single_pulse_decouple
Data format  = 1D COMPLEX
Dim_size     = 26214
Dim_title    = 13C
Dim_units    = [ppm]
Dimensions   = X
Site         = ECA 500
Spectrometer = DELTA2_NMR

Field_strength = 11.62926421[T] (500[M]
X_acq_duration = 0.8388608[s]
X_domain       = 13C
X_freq         = 124.5010059[MHz]
X_offset       = 100[ppm]
X_points       = 32768
X_prescans     = 4
X_resolution   = 1.1920929[Hz]
X_sweep        = 39.0625[kHz]
Irr_domain     = 1H
Irr_freq       = 495.13191398[MHz]
Irr_offset     = 5[ppm]
Clipped        = FALSE
Mod_return     = 1
Scans          = 18907
Total_scans    = 18907

X_90_width     = 10.1[us]
X_acq_time     = 0.8388608[s]
X_angle        = 30[deg]
X_atn          = 9.5[dB]
X_pulse        = 3.36666667[us]
Irr_atn_dec    = 21.51[dB]
Irr_atn_noe    = 21.51[dB]
Irr_noise      = WALZT
Decoupling     = TRUE
Initial_wait   = 1[s]
Noe             = TRUE
Noe_time       = 2[s]
Recvr_gain     = 60
Relaxation_delay = 2[s]
Repetition_time = 2.8388608[s]
Temp_get       = 23.8[dc]
  
```

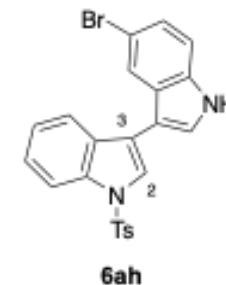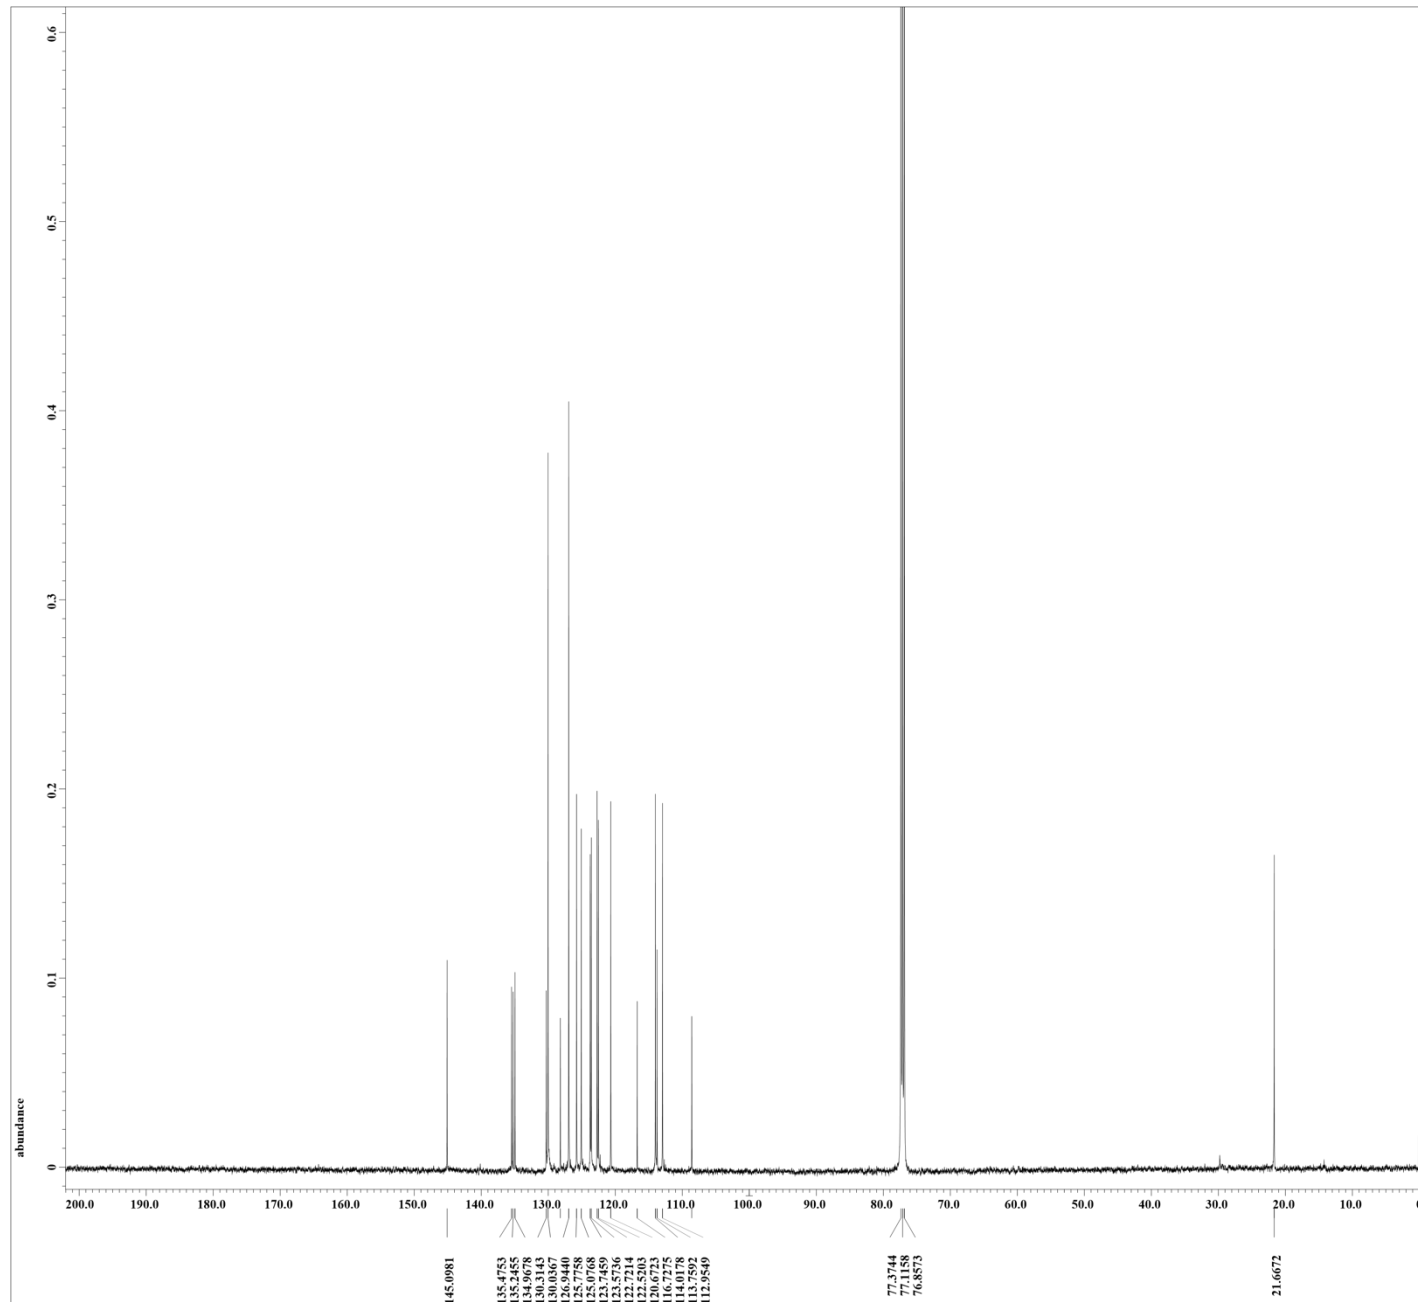

X : parts per Million : 13C



----- PROCESSING PARAMETERS -----  
 dc balance : 0 : FALSE  
 seXp : 0.2[Hz] : 0.0[s]  
 trapezoid3 : 0[%] : 80[%] : 100[%]  
 zeroFill : 1  
 fft : 1 : TRUE : TRUE  
 machinephase  
 ppm  
 Derived from: TA2020-0107-2.jdf

Filename = TA2020-0107-21.jdf  
 Author = delta  
 Experiment = single\_pulse.ex2  
 Sample\_id = S9442819  
 Solvent = CHLOROFORM-D  
 Creation time = 25-MAR-2000 14:07:15  
 Revision time = 1-FEB-2020 19:09:59  
 Current time = 1-FEB-2020 19:12:22  
 Comment = single\_pulse  
 Data format = 1D COMPLEX  
 Dim Time = 13107  
 Dim\_title = 1H  
 Dim\_units = [ppm]  
 Dimensions = X  
 Site = ECA500  
 Spectrometer = DELTA2 NMR  
 Field\_strength = 11.7473579[T] (500[MH  
 X\_acq\_duration = 1.74587904[s]  
 X\_domain = 1H  
 X\_freq = 500.15991521[MHz]  
 X\_offset = 5.0[ppm]  
 X\_points = 16384  
 X\_prescans = 1  
 X\_resolution = 0.57277737[Hz]  
 X\_sweep = 9.38438438[kHz]  
 Irr\_domain = 1H  
 Irr\_freq = 500.15991521[MHz]  
 Irr\_offset = 5.0[ppm]  
 Tri\_domain = 1H  
 Tri\_freq = 500.15991521[MHz]  
 Tri\_offset = 5.0[ppm]  
 Clipped = FALSE  
 Mod return = 1  
 Scans = 8  
 Total\_scans = 8  
 X\_90\_width = 12[us]  
 X\_acq\_time = 1.74587904[s]  
 X\_angle = 45[deg]  
 X\_atn = 3.4[dB]  
 X\_pulse = 6[us]  
 Irr\_mode = Off  
 Tri\_mode = Off  
 Dante\_presat = FALSE  
 Initial\_wait = 1[s]  
 Recvr\_gain = 50  
 Relaxation\_delay = 5[s]  
 Repetition\_time = 6.74587904[s]  
 Temp\_get = 23.2[dc]

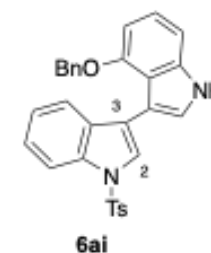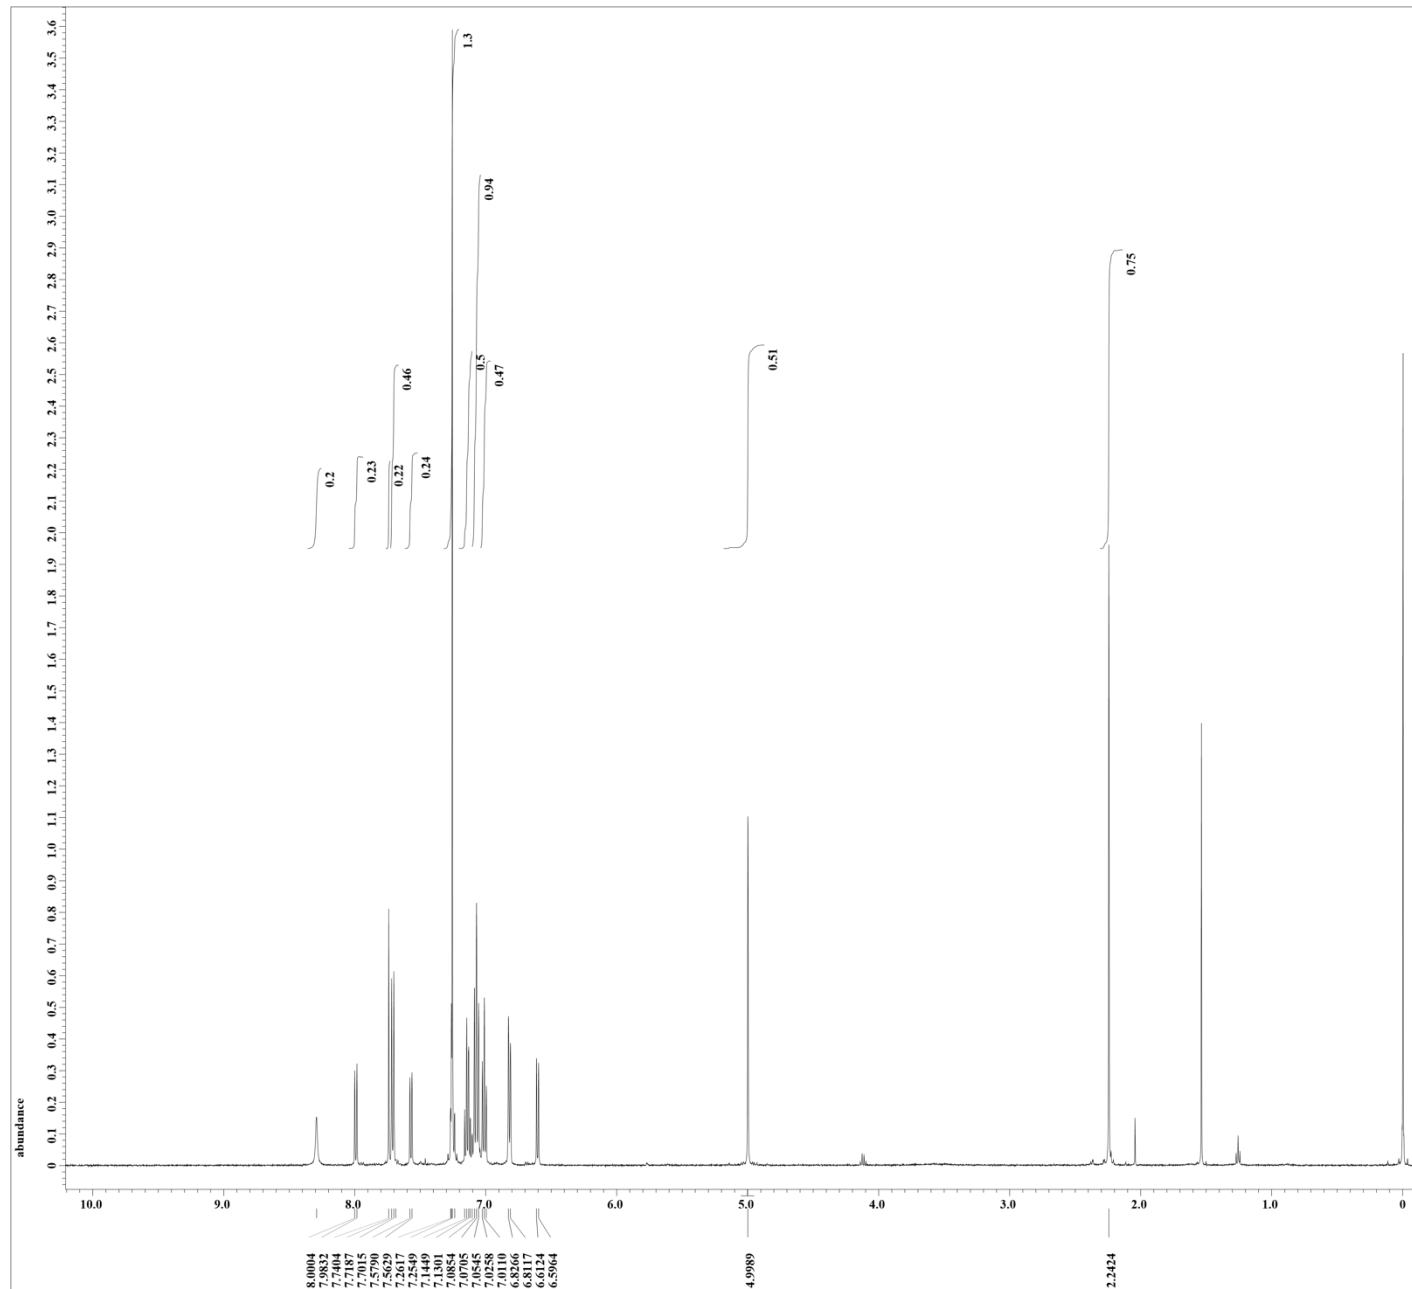

X : parts per Million : 1H



----- PROCESSING PARAMETERS -----  
 dc balance : 0 : FALSE  
 seXp : 2.0[Hz] : 0.0[s]  
 trapezoid3 : 0[%] : 80[%] : 100[%]  
 zeroFill : 1  
 fft : 1 : TRUE : TRUE  
 machinephase  
 ppm  
 Derived from: TA2020-0107-11.jdf

Filename = TA2020-0107-21.jdf  
 Author = delta  
 Experiment = single\_pulse\_dec  
 Sample\_id = S8676370  
 Solvent = CHLOROFORM-D  
 Creation time = 26-MAR-2000 10:13:38  
 Revision time = 1-FEB-2020 19:00:20  
 Current time = 1-FEB-2020 19:00:54  
 Comment = single pulse decouple  
 Data format = 1D COMPLEX  
 Dim Time = 26214  
 Dim Title = 13C  
 Dim Units = [ppm]  
 Dimensions = X  
 Site = ECA500  
 Spectrometer = DELTA2 NMR  
 Field strength = 11.7473579[T] (500[MH  
 X\_acq\_duration = 0.83361792[s]  
 X\_domain = 13C  
 X\_freq = 125.76529768[MHz]  
 X\_offset = 100[ppm]  
 X\_points = 32768  
 X\_prescans = 4  
 X\_resolution = 1.19959034[Hz]  
 X\_sweep = 39.3081761[kHz]  
 Irr\_domain = 1H  
 Irr\_freq = 500.15991521[MHz]  
 Irr\_offset = 5.0[ppm]  
 Clipped = TRUE  
 Mod\_return = 1  
 Scans = 17313  
 Total\_scans = 17313  
 X\_90\_width = 12.8[us]  
 X\_acq\_time = 0.83361792[s]  
 X\_angle = 30[deg]  
 X\_atn = 5.3[dB]  
 X\_pulse = 4.26666667[us]  
 Irr\_atn\_dec = 21.09[dB]  
 Irr\_atn\_noe = 21.09[dB]  
 Irr\_noise = WALZ  
 Decoupling = TRUE  
 Initial\_wait = 1[s]  
 Noe = TRUE  
 Noe\_time = 2[s]  
 RecVr\_gain = 60  
 Relaxation\_delay = 2[s]  
 Repetition\_time = 2.83361792[s]  
 Temp\_get = 24.6[dc]

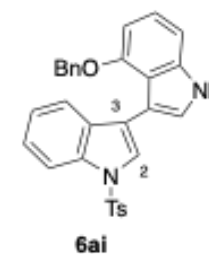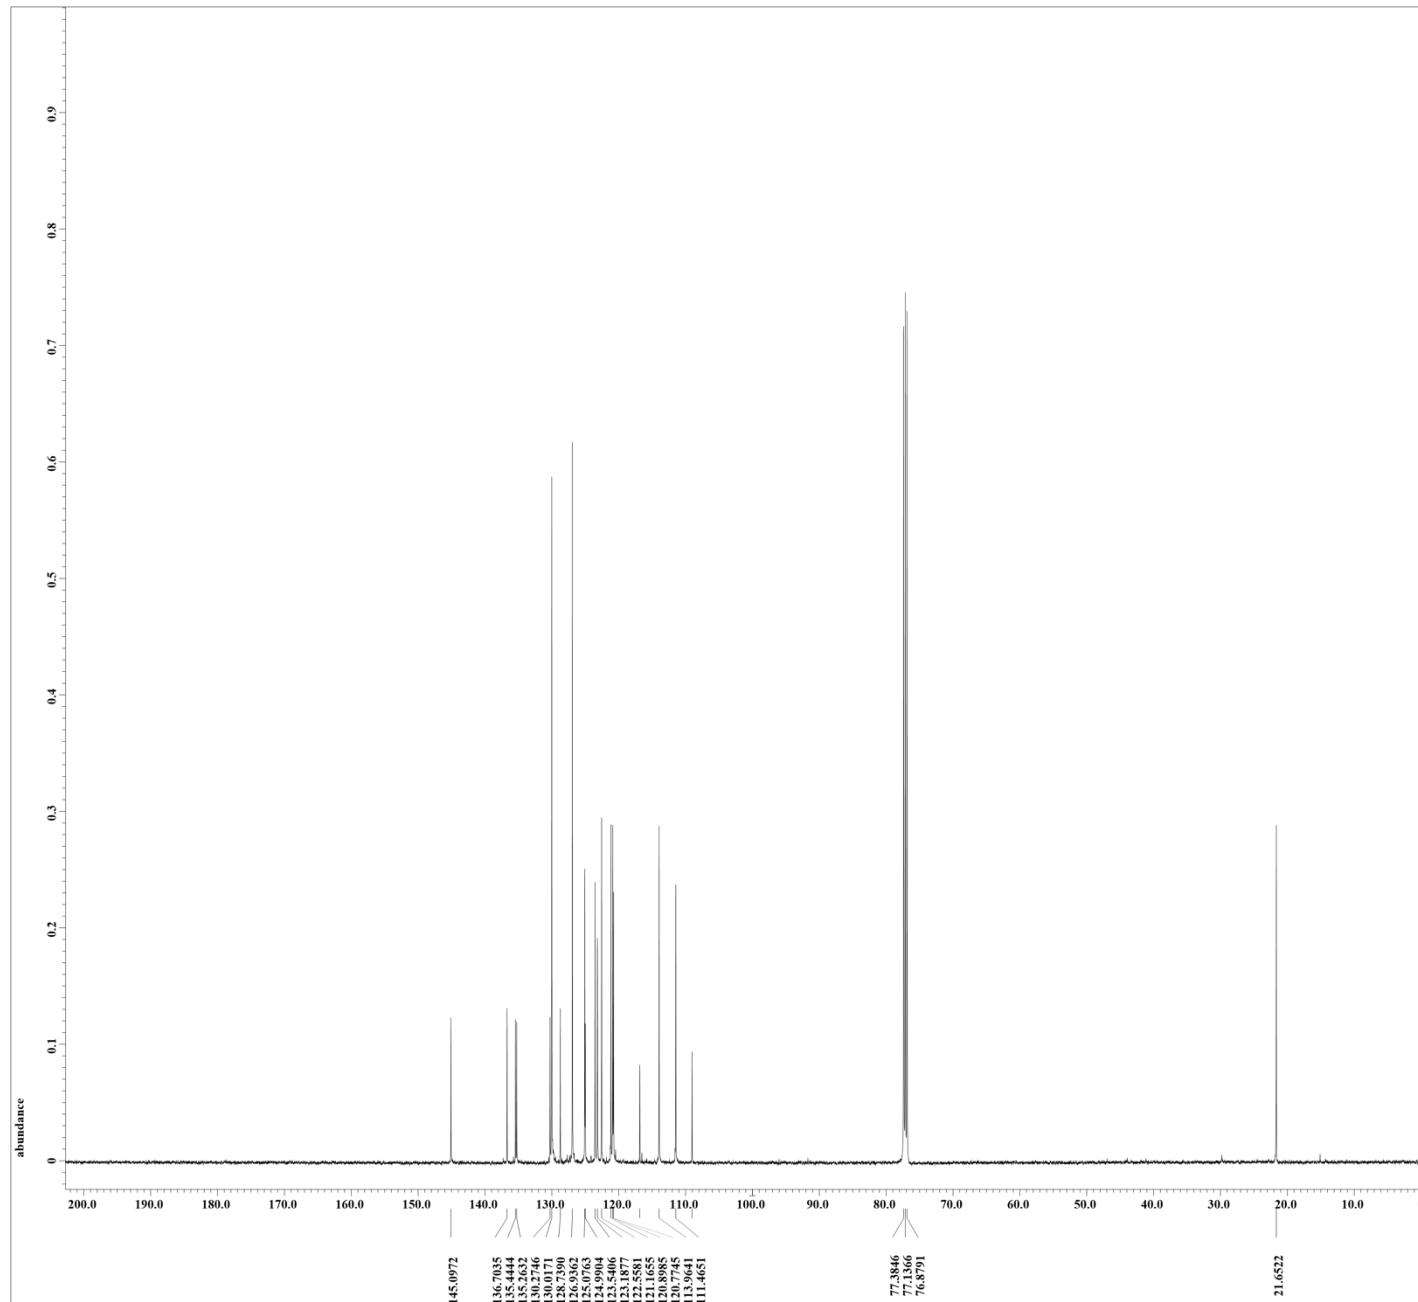





Filename = 7A200102-12.jdf  
 Author = delta  
 Experiment = single\_pulse.ex2  
 Sample\_id = S#462431  
 Solvent = CHLOROFORM-D  
 Creation\_time = 2-JAN-2020 12:02:06  
 Revision\_time = 1-FEB-2020 18:46:17  
 Current\_time = 1-FEB-2020 18:46:40

Content = single\_pulse  
 Data format = 1D COMPLEX  
 Dim\_size = 13107  
 Dim\_title = 1H  
 Dim\_units = [ppm]  
 Dimensions = X  
 Site = ECA 500  
 Spectrometer = DELTA2\_NMR

Field\_strength = 11.62926421[T] (500[M]  
 X\_acq\_duration = 1.76422912[s]  
 X\_domain = 1H  
 X\_freq = 495.13191398[MHz]  
 X\_offset = 5[ppm]  
 X\_points = 16384  
 X\_prescans = 1  
 X\_resolution = 0.5668198[Hz]  
 X\_sweep = 9.28677563[kHz]  
 Irr\_domain = 1H  
 Irr\_freq = 495.13191398[MHz]  
 Irr\_offset = 5[ppm]  
 Tri\_domain = 1H  
 Tri\_freq = 495.13191398[MHz]  
 Tri\_offset = 5[ppm]  
 Clipped = FALSE  
 Mod\_return = 1  
 Scans = 8  
 Total\_scans = 8

X\_90\_width = 11.3[us]  
 X\_acq\_time = 1.76422912[s]  
 X\_angle = 45[deg]  
 X\_atn = 3.3[db]  
 X\_pulse = 5.65[us]  
 Irr\_mode = Off  
 Tri\_mode = Off  
 Dante\_presat = FALSE  
 Initial\_wait = 1[s]  
 Recvz\_gain = 38  
 Relaxation\_delay = 5[s]  
 Repetition\_time = 6.76422912[s]  
 Temp\_get = 23.2[dc]

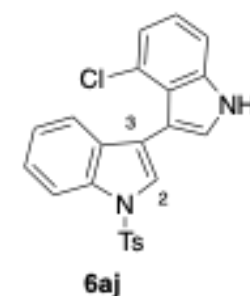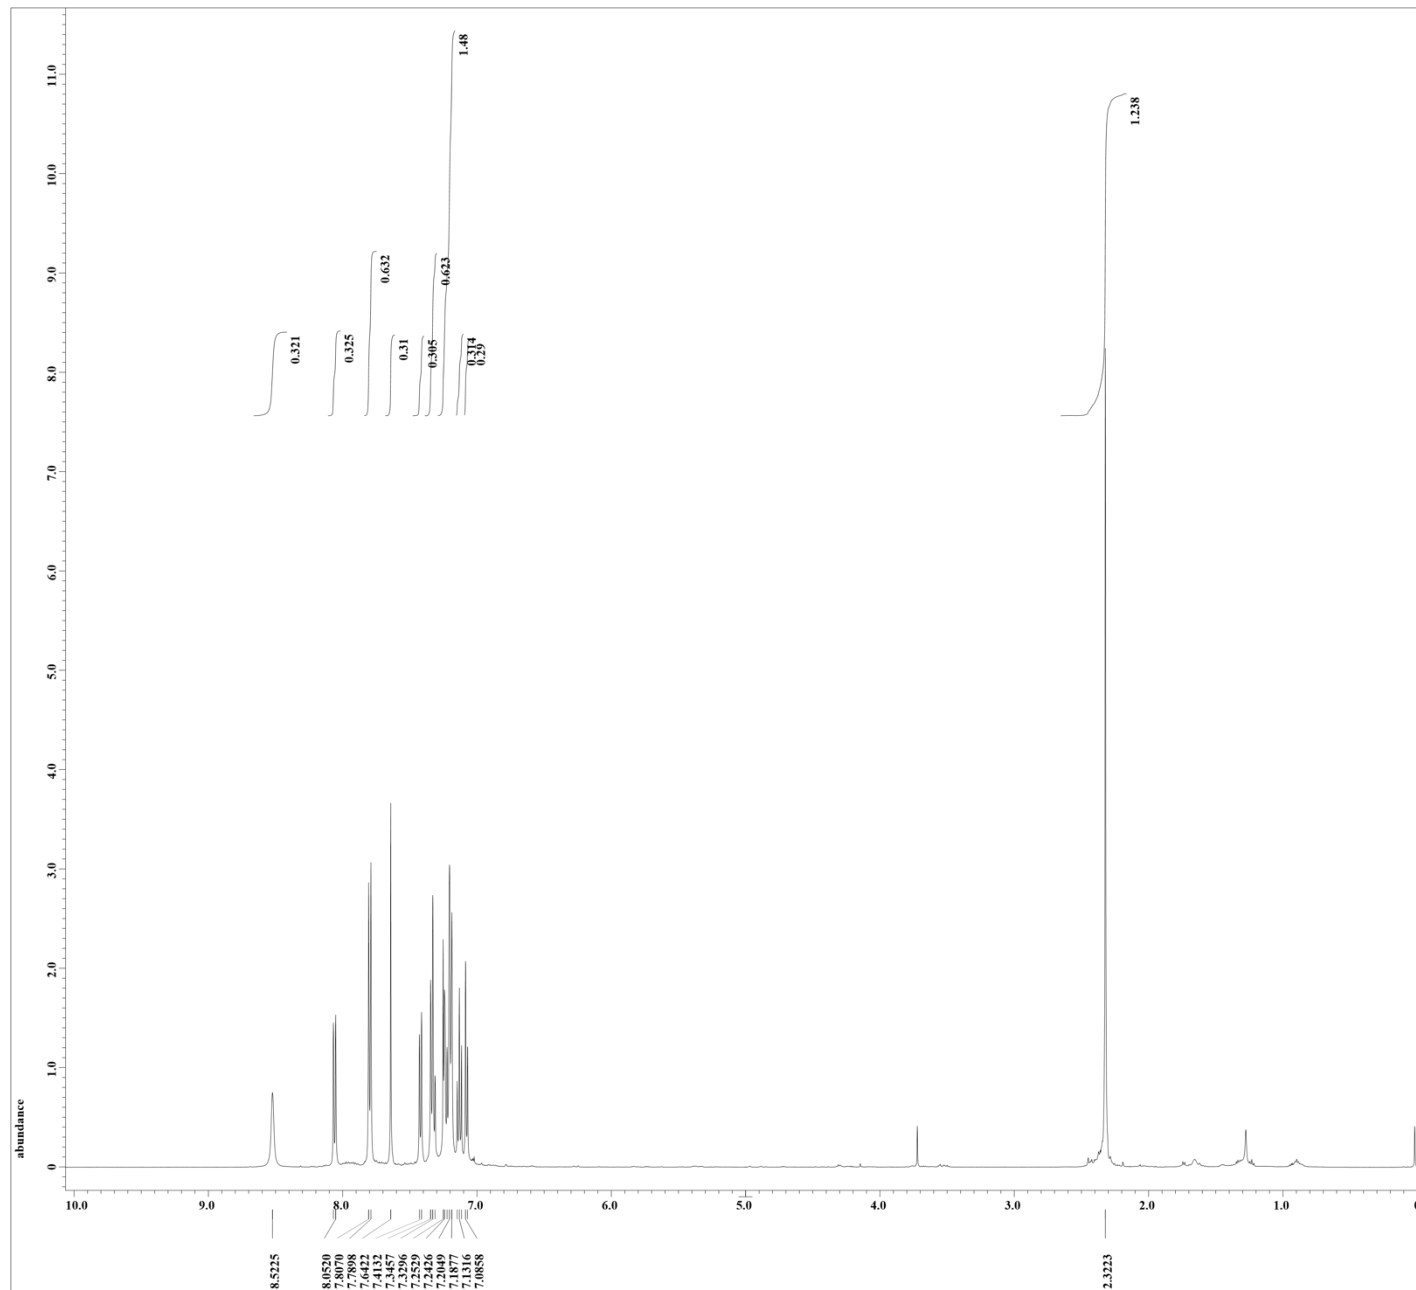

X : parts per Million : 1H



```

Filename      = 7A200102-10.jdf
Author       = delta
Experiment   = single_pulse_dec
Sample_id    = S#499169
Solvent      = CHLOROFORM-D
Creation_time = 3-JAN-2020 09:44:28
Revision_time = 1-FEB-2020 18:48:00
Current_Time = 1-FEB-2020 18:48:39

Content       = single_pulse_decouple
Data_format   = 1D COMPLEX
Dim_size      = 26214
Dim_title     = 13C
Dim_units     = [ppm]
Dimensions    = X
Site          = ECA 500
Spectrometer  = DELTA2_NMR

Field_strength = 11.62926421[T] (500[M]
X_acq_duration = 0.8388608[s]
X_domain       = 13C
X_freq         = 124.5010059[MHz]
X_offset       = 100[ppm]
X_points       = 32768
X_prescans     = 4
X_resolution   = 1.1920929[Hz]
X_sweep        = 39.0625[kHz]
Irr_domain     = 1H
Irr_freq       = 495.13191398[MHz]
Irr_offset     = 5[ppm]
Clipped        = FALSE
Mod_return     = 1
Scans          = 26249.0
Total_scans    = 26249.0

X_90_width     = 10.1[us]
X_acq_time     = 0.8388608[s]
X_angle        = 30[deg]
X_atn          = 9.5[dB]
X_pulse        = 3.36666667[us]
Irr_atn_dec    = 21.51[dB]
Irr_atn_noe    = 21.51[dB]
Irr_noise      = WALTZ
Decoupling     = TRUE
Initial_wait   = 1[s]
Noe            = TRUE
Noe_time       = 2[s]
Recvr_gain     = 60
Relaxation_delay = 2[s]
Repetition_time = 2.8388608[s]
Temp_get       = 23.6[dc]
  
```

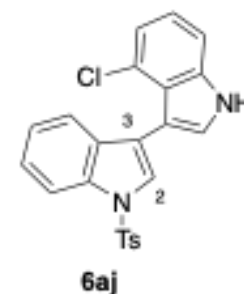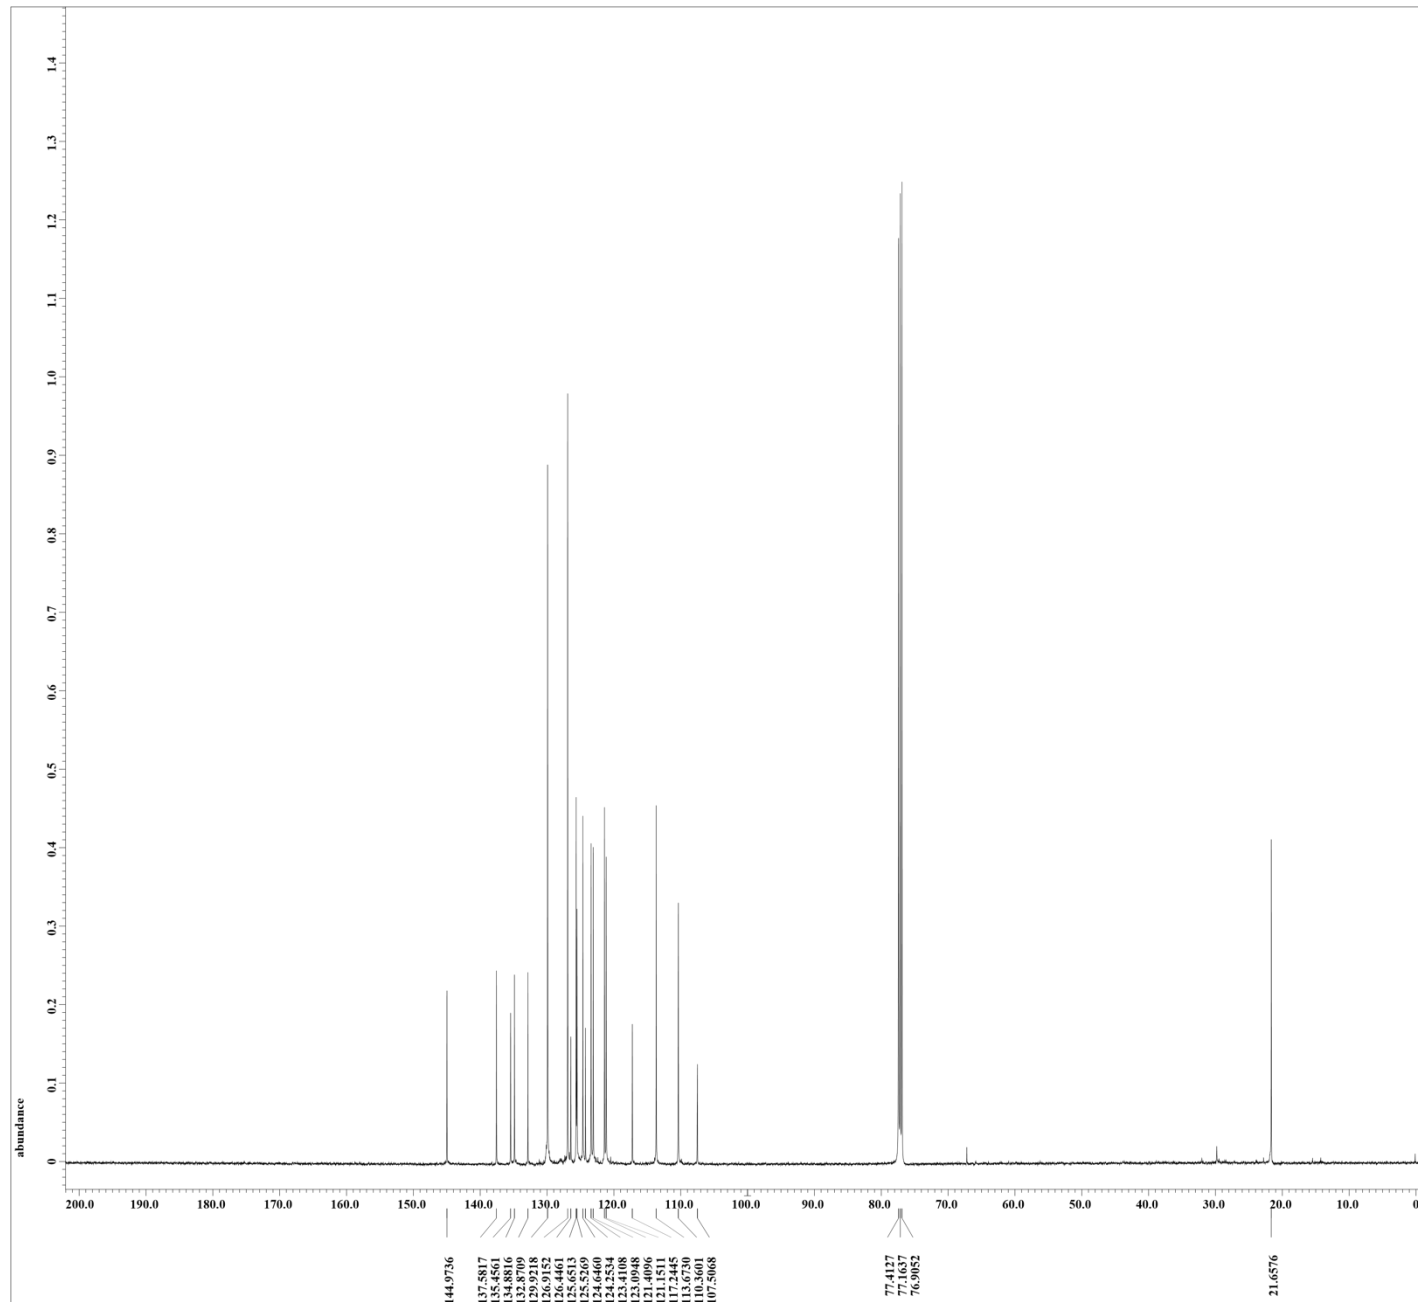

X : parts per Million : 13C



Filename = 7A200106-10.jdf  
 Author = delta  
 Experiment = single\_pulse.ex2  
 Sample\_id = S#495301  
 Solvent = CHLOROFORM-D  
 Creation\_time = 6-JAN-2020 12:56:29  
 Revision\_time = 1-FEB-2020 18:39:39  
 Current\_time = 1-FEB-2020 18:40:06

Content = single\_pulse  
 Data\_format = 1D\_COMPLEX  
 Dim\_size = 13107  
 Dim\_title = 1H  
 Dim\_units = [ppm]  
 Dimensions = X  
 Site = ECA 500  
 Spectrometer = DELTA2\_NMR

Field\_strength = 11.62926421[T] (500[M]  
 X\_acq\_duration = 1.76422912[s]  
 X\_domain = 1H  
 X\_freq = 495.13191398[MHz]  
 X\_offset = 5[ppm]  
 X\_points = 16384  
 X\_prescans = 1  
 X\_resolution = 0.5668198[Hz]  
 X\_sweep = 9.28677563[kHz]  
 Irr\_domain = 1H  
 Irr\_freq = 495.13191398[MHz]  
 Irr\_offset = 5[ppm]  
 Tri\_domain = 1H  
 Tri\_freq = 495.13191398[MHz]  
 Tri\_offset = 5[ppm]  
 Clipped = FALSE  
 Mod\_return = 1  
 Scans = 8  
 Total\_scans = 8

X\_90\_width = 11.3[us]  
 X\_acq\_time = 1.76422912[s]  
 X\_angle = 45[deg]  
 X\_atn = 3.3[db]  
 X\_pulse = 5.65[us]  
 Irr\_mode = Off  
 Tri\_mode = Off  
 Dante\_presat = FALSE  
 Initial\_wait = 1[s]  
 Recv\_gain = 44  
 Relaxation\_delay = 5[s]  
 Repetition\_time = 6.76422912[s]  
 Temp\_get = 79.4[dc]

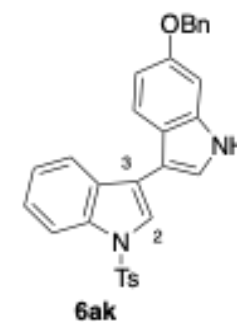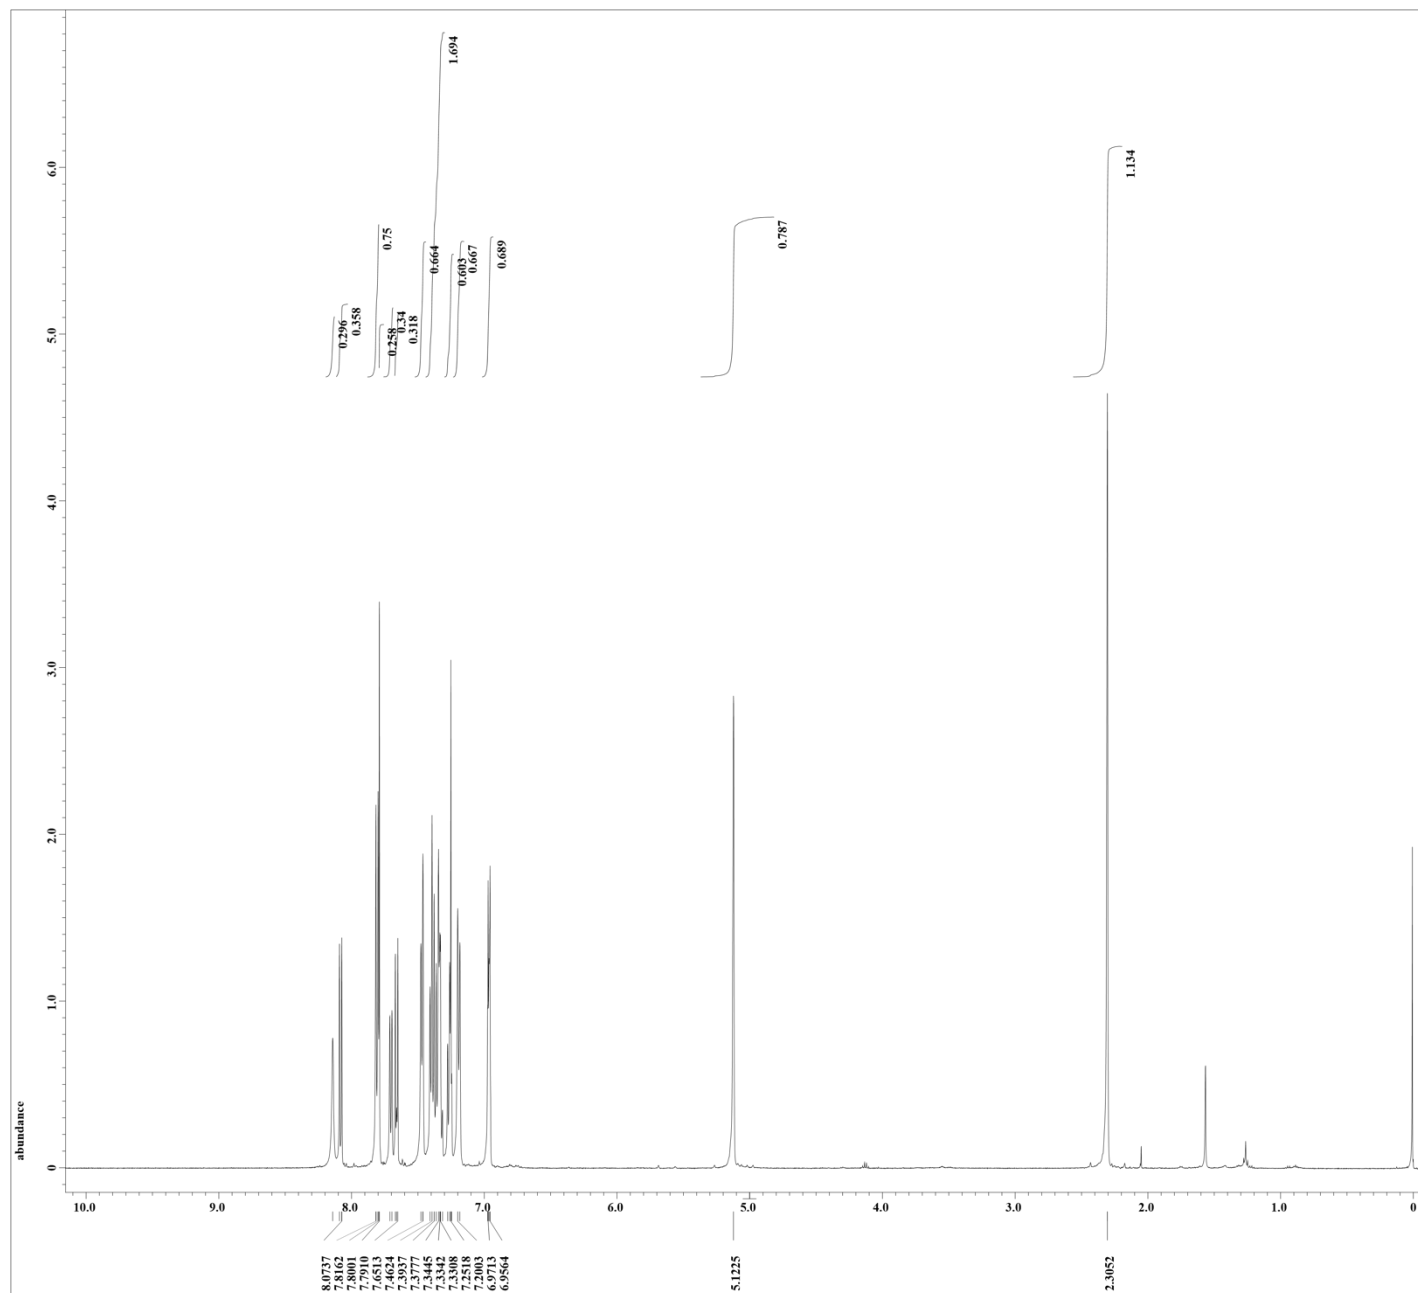

X : parts per Million : 1H



Filename = 7A200106-10.jdf  
 Author = delta  
 Experiment = single\_pulse\_dec  
 Sample\_id = S#565702  
 Solvent = CHLOROFORM-D  
 Creation\_time = 7-JAN-2020 07:35:25  
 Revision\_time = 1-FEB-2020 18:35:34  
 Current\_time = 1-FEB-2020 18:36:11

Content = single\_pulse\_decouple  
 Data\_format = 1D\_COMPLEX  
 Dim\_size = 26214  
 Dim\_title = 13C  
 Dim\_units = [ppm]  
 Dimensions = X  
 Site = ECA 500  
 Spectrometer = DELTA2\_NMR

Field\_strength = 11.62926421[T] (500[M]  
 X\_acq\_duration = 0.8388608[s]  
 X\_domain = 13C  
 X\_freq = 124.5010059[MHz]  
 X\_offset = 100[ppm]  
 X\_points = 32768  
 X\_prescans = 4  
 X\_resolution = 1.1920929[Hz]  
 X\_sweep = 39.0625[kHz]  
 Irr\_domain = 1H  
 Irr\_freq = 495.13191398[MHz]  
 Irr\_offset = 5[ppm]  
 Clipped = FALSE  
 Mod\_return = 1  
 Scans = 21195  
 Total\_scans = 21195

X\_90\_width = 10.1[us]  
 X\_acq\_time = 0.8388608[s]  
 X\_angle = 30[deg]  
 X\_atn = 9.5[dB]  
 X\_pulse = 3.36666667[us]  
 Irr\_atn\_dec = 21.51[dB]  
 Irr\_atn\_noe = 21.51[dB]  
 Irr\_noise = WALTZ  
 Decoupling = TRUE  
 Initial\_wait = 1[s]  
 Noe = TRUE  
 Noe\_time = 2[s]  
 Recvr\_gain = 60  
 Relaxation\_delay = 2[s]  
 Repetition\_time = 2.8388608[s]  
 Temp\_get = 101.3[degC]

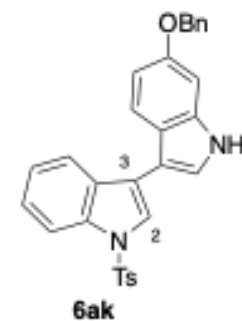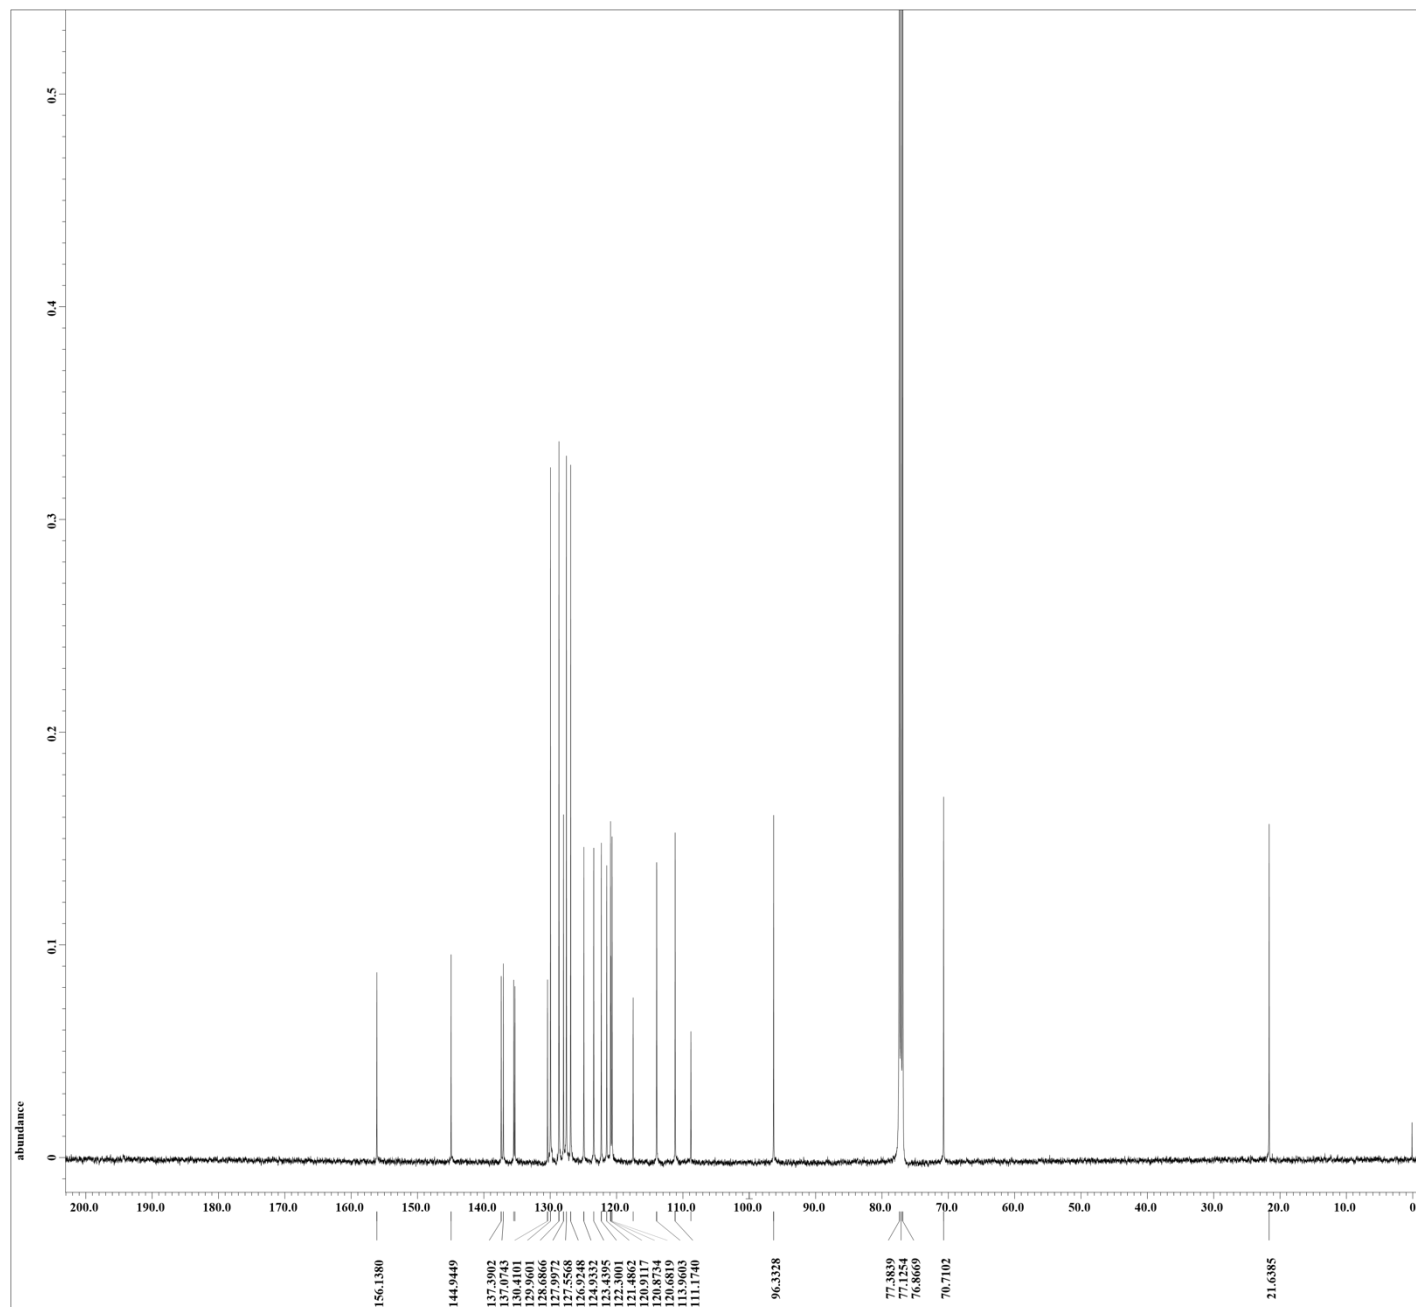

X : parts per Million : 13C

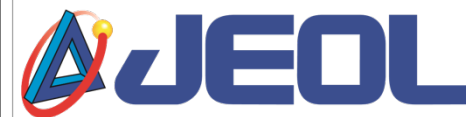

Filename = 7A200108-9.jdf  
 Author = delta  
 Experiment = single\_pulse.ex2  
 Sample\_id = S#632215  
 Solvent = CHLOROFORM-D  
 Creation\_time = 8-JAN-2020 16:43:38  
 Revision\_time = 1-FEB-2020 18:59:32  
 Current\_time = 1-FEB-2020 19:09:53

Content = single\_pulse  
 Data\_format = 1D\_COMPLEX  
 Dim\_size = 13107  
 Dim\_title = 1H  
 Dim\_units = [ppm]  
 Dimensions = X  
 Site = ECA 500  
 Spectrometer = DELTA2\_NMR

Field\_strength = 11.62926421[T] (500[M]  
 X\_acq\_duration = 1.76422912[s]  
 X\_domain = 1H  
 X\_freq = 495.13191398[MHz]  
 X\_offset = 5[ppm]  
 X\_points = 16384  
 X\_prescans = 1  
 X\_resolution = 0.5668198[Hz]  
 X\_sweep = 9.28677563[kHz]  
 Irr\_domain = 1H  
 Irr\_freq = 495.13191398[MHz]  
 Irr\_offset = 5[ppm]  
 Tri\_domain = 1H  
 Tri\_freq = 495.13191398[MHz]  
 Tri\_offset = 5[ppm]  
 Clipped = FALSE  
 Mod\_return = 1  
 Scans = 8  
 Total\_scans = 8

X\_90\_width = 11.3[us]  
 X\_acq\_time = 1.76422912[s]  
 X\_angle = 45[deg]  
 X\_atn = 3.3[db]  
 X\_pulse = 5.65[us]  
 Irr\_mode = Off  
 Tri\_mode = Off  
 Dante\_presat = FALSE  
 Initial\_wait = 1[s]  
 Recvz\_gain = 50  
 Relaxation\_delay = 5[s]  
 Repetition\_time = 6.76422912[s]  
 Temp\_get = 114.1[dC]

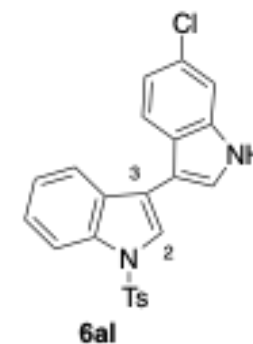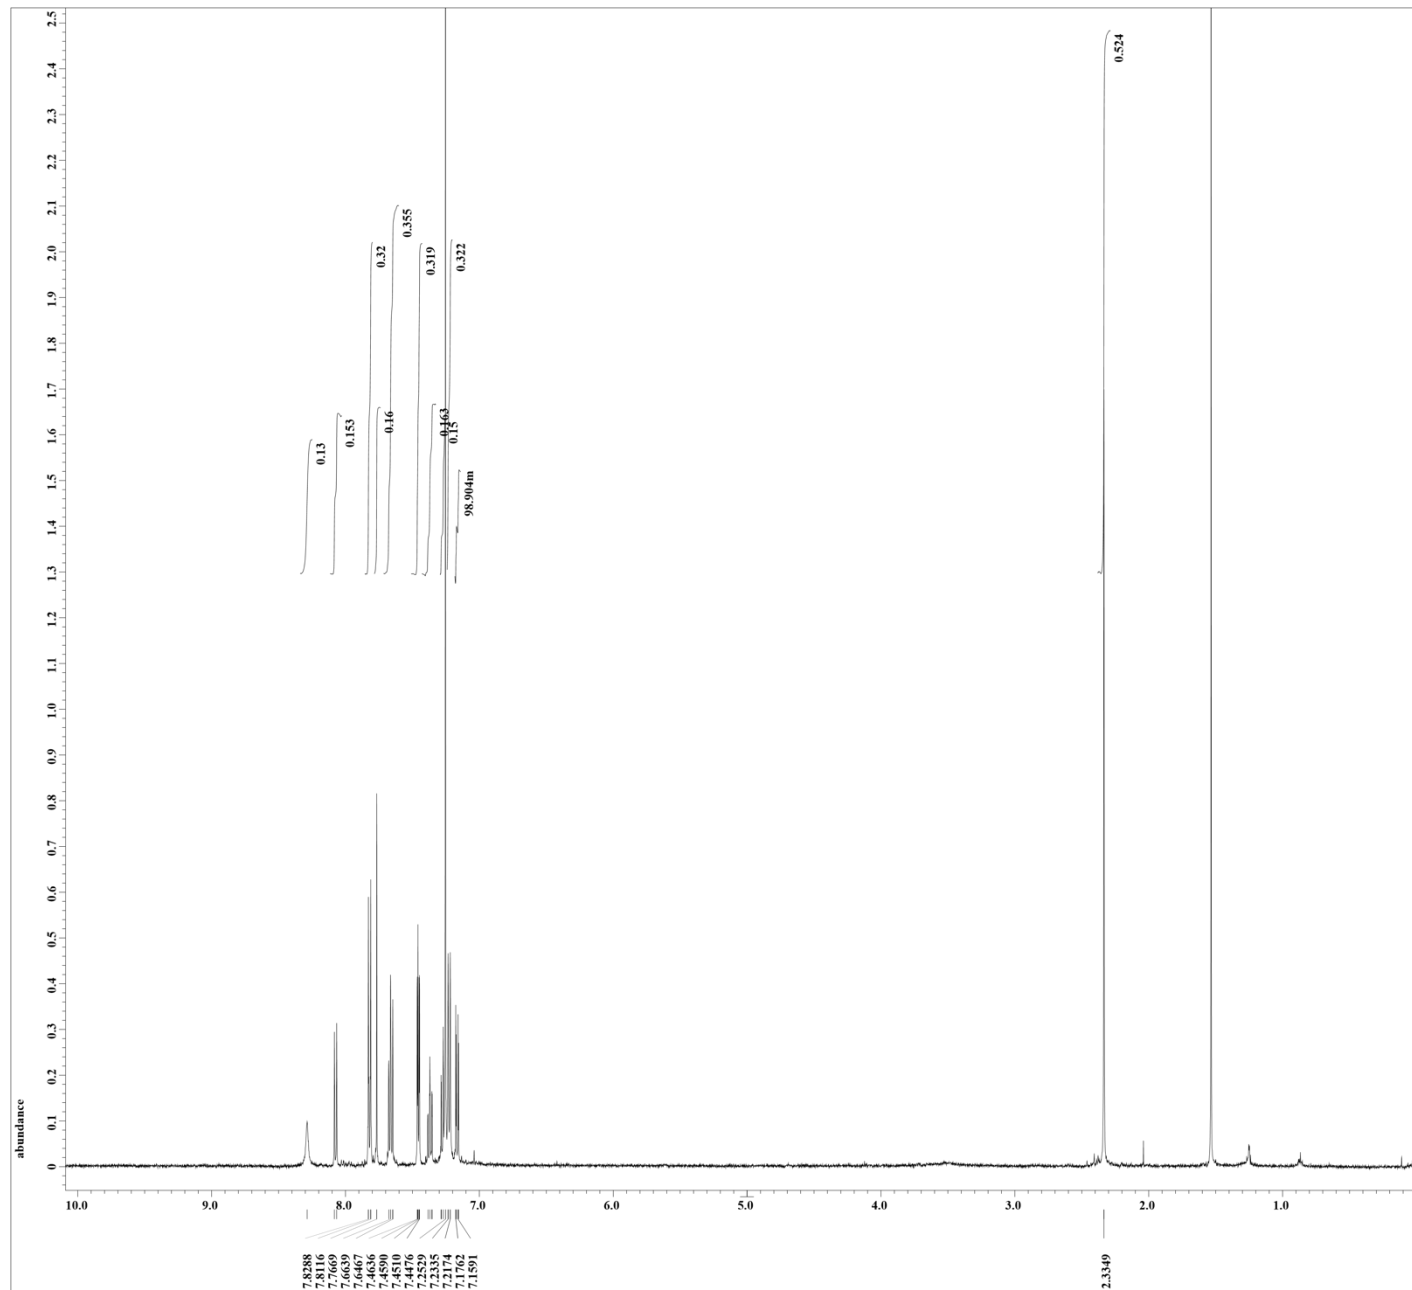

X : parts per Million : 1H

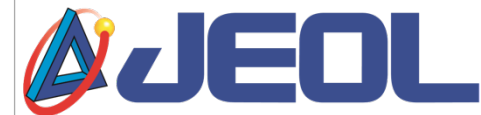

----- PROCESSING PARAMETERS -----  
 dc balance : 0 : FALSE  
 seXp : 2.0[Hz] : 0.0[s]  
 trapezoid3 : 0[%] : 80[%] : 100[%]  
 zeroFill : 1  
 fft : 1 : TRUE : TRUE  
 machinephase  
 ppm  
 Derived from: TA2020-0107-11.jdf

Filename = TA2020-0107-17.jdf  
 Author = delta  
 Experiment = single pulse dec  
 Sample\_id = S8676370  
 Solvent = CHLOROFORM-D  
 Creation time = 26-MAR-2000 10:13:38  
 Revision time = 1-FEB-2020 18:44:43  
 Current time = 1-FEB-2020 18:45:22  
 Comment = single pulse decouple  
 Data format = 1D COMPLEX  
 Dim Time = 26214  
 Dim\_title = 13C  
 Dim\_units = [ppm]  
 Dimensions = X  
 Site = ECA500  
 Spectrometer = DELTA2 NMR  
 Field\_strength = 11.7473579[T] (500[MH  
 X\_acq\_duration = 0.83361792[s]  
 X\_domain = 13C  
 X\_freq = 125.76529768[MHz]  
 X\_offset = 100[ppm]  
 X\_points = 32768  
 X\_prescans = 4  
 X\_resolution = 1.19959034[Hz]  
 X\_sweep = 39.3081761[kHz]  
 Irr\_domain = 1H  
 Irr\_freq = 500.15991521[MHz]  
 Irr\_offset = 5.0[ppm]  
 Clipped = TRUE  
 Mod\_return = 1  
 Scans = 17313  
 Total\_scans = 17313  
 X\_90\_width = 12.8[us]  
 X\_acq\_time = 0.83361792[s]  
 X\_angle = 30[deg]  
 X\_atn = 5.3[dB]  
 X\_pulse = 4.26666667[us]  
 Irr\_atn\_dec = 21.09[dB]  
 Irr\_atn\_noe = 21.09[dB]  
 Irr\_noise = WALZ  
 Decoupling = TRUE  
 Initial\_wait = 1[s]  
 Noe = TRUE  
 Noe\_time = 2[s]  
 RecVr\_gain = 60  
 Relaxation\_delay = 2[s]  
 Repetition\_time = 2.83361792[s]  
 Temp\_get = 24.6[dc]

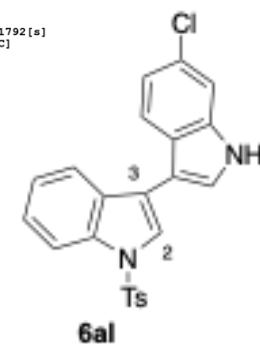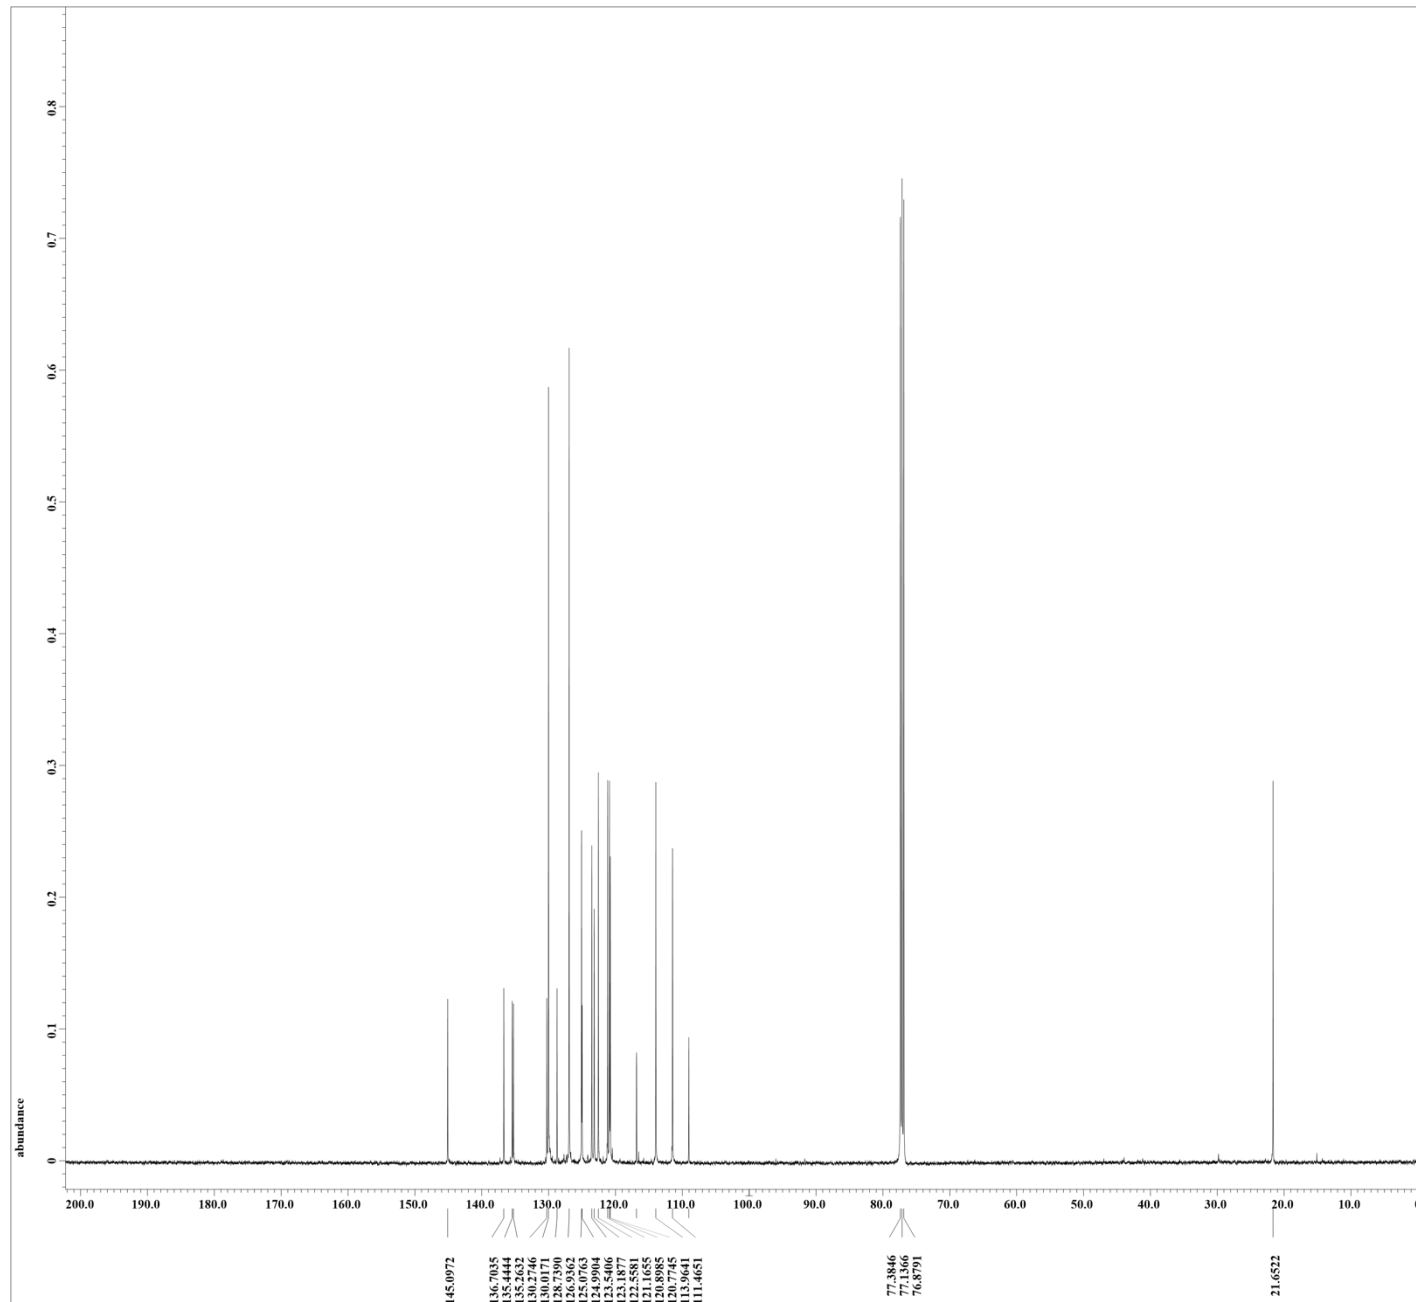



Filename = 7A200101-15.jdf  
 Author = delta  
 Experiment = single\_pulse.ex2  
 Sample\_id = S8485945  
 Solvent = CHLOROFORM-D  
 Creation\_time = 1-JAN-2020 12:41:10  
 Revision\_time = 1-FEB-2020 19:47:38  
 Current\_time = 1-FEB-2020 19:48:09

Content = single\_pulse  
 Data\_format = 1D\_COMPLEX  
 Dim\_size = 13107  
 Dim\_title = 1H  
 Dim\_units = [ppm]  
 Dimensions = X  
 Site = ECA 500  
 Spectrometer = DELTA2\_NMR

Field\_strength = 11.62926421[T] (500[M]  
 X\_acq\_duration = 1.76422912[s]  
 X\_domain = 1H  
 X\_freq = 495.13191398[MHz]  
 X\_offset = 5[ppm]  
 X\_points = 16384  
 X\_prescans = 1  
 X\_resolution = 0.5668198[Hz]  
 X\_sweep = 9.28677563[kHz]  
 Irr\_domain = 1H  
 Irr\_freq = 495.13191398[MHz]  
 Irr\_offset = 5[ppm]  
 Tri\_domain = 1H  
 Tri\_freq = 495.13191398[MHz]  
 Tri\_offset = 5[ppm]  
 Clipped = FALSE  
 Mod\_return = 1  
 Scans = 8  
 Total\_scans = 8

X\_90\_width = 11.3[us]  
 X\_acq\_time = 1.76422912[s]  
 X\_angle = 45[deg]  
 X\_atn = 3.3[db]  
 X\_pulse = 5.65[us]  
 Irr\_mode = Off  
 Tri\_mode = Off  
 Dante\_presat = FALSE  
 Initial\_wait = 1[s]  
 Recv\_gain = 48  
 Relaxation\_delay = 5[s]  
 Repetition\_time = 6.76422912[s]  
 Temp\_get = 23.4[dc]

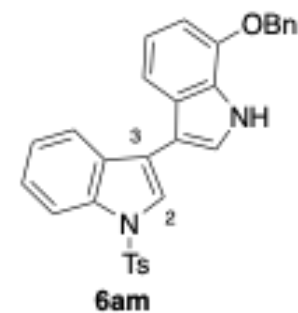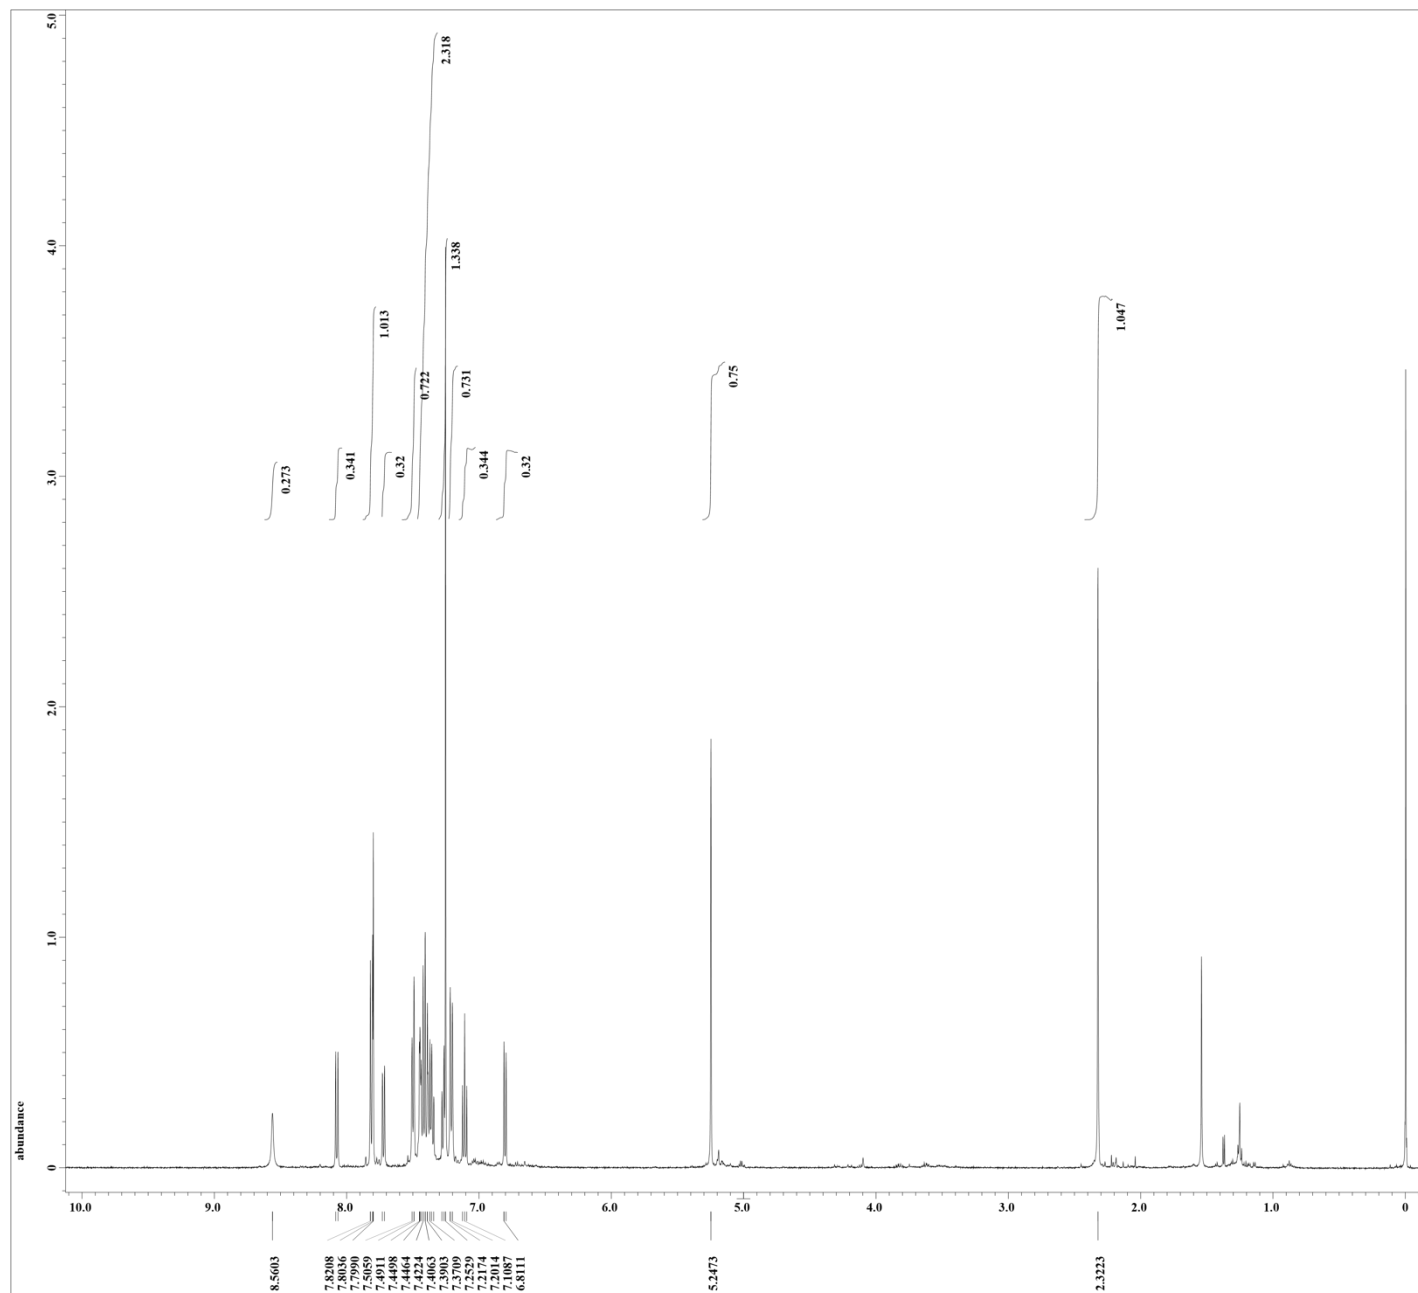

X : parts per Million : 1H



----- PROCESSING PARAMETERS -----  
dc balance : 0 : FALSE  
sexp : 2.0[Hz] : 0.0[s]  
trapezoid3 : 0[%] : 80[%] : 100[%]  
zerofill : 1  
fft : 1 : TRUE : TRUE  
machinephase  
ppm  
Derived from: TA2020-0101-1.jdf

Filename = TA2020-0101-3.jdf  
Author = delta  
Experiment = single\_pulse\_dec  
Sample\_id = S946029  
Solvent = CHLOROFORM-D  
Creation time = 18-MAR-2000 21:38:55  
Revision time = 1-FEB-2020 19:14:57  
Current time = 1-FEB-2020 19:15:44

Comment = single pulse decouple  
Data format = 1D COMPLEX  
Dim Time = 26214  
Dim\_title = 13C  
Dim\_units = [ppm]  
Dimensions = X  
Site = ECA500  
Spectrometer = DELTA2 NMR

Field\_strength = 11.7473579[T] (500[MH  
X\_acq\_duration = 0.83361792[s]  
X\_domain = 13C  
X\_freq = 125.76529768[MHz]  
X\_offset = 100[ppm]  
X\_points = 32768  
X\_prescans = 4  
X\_resolution = 1.19959034[Hz]  
X\_sweep = 39.3081761[kHz]  
Irr\_domain = 1H  
Irr\_freq = 500.15991521[MHz]  
Irr\_offset = 5.0[ppm]  
Clipped = TRUE  
Mod\_return = 1  
Scans = 8045  
Total\_scans = 8045

X\_90\_width = 12.8[us]  
X\_acq\_time = 0.83361792[s]  
X\_angle = 30[deg]  
X\_atn = 5.3[dB]  
X\_pulse = 4.26666667[us]  
Irr\_atn\_dec = 21.09[dB]  
Irr\_atn\_noe = 21.09[dB]  
Irr\_noise = WALZ  
Decoupling = TRUE  
Initial\_wait = 1[s]  
Noe = TRUE  
Noe\_time = 2[s]  
Recvr\_gain = 60  
Relaxation\_delay = 2[s]  
Repetition\_time = 2.83361792[s]  
Temp\_get = 24.7[dc]

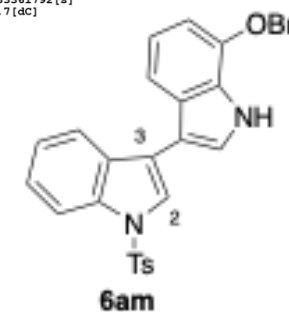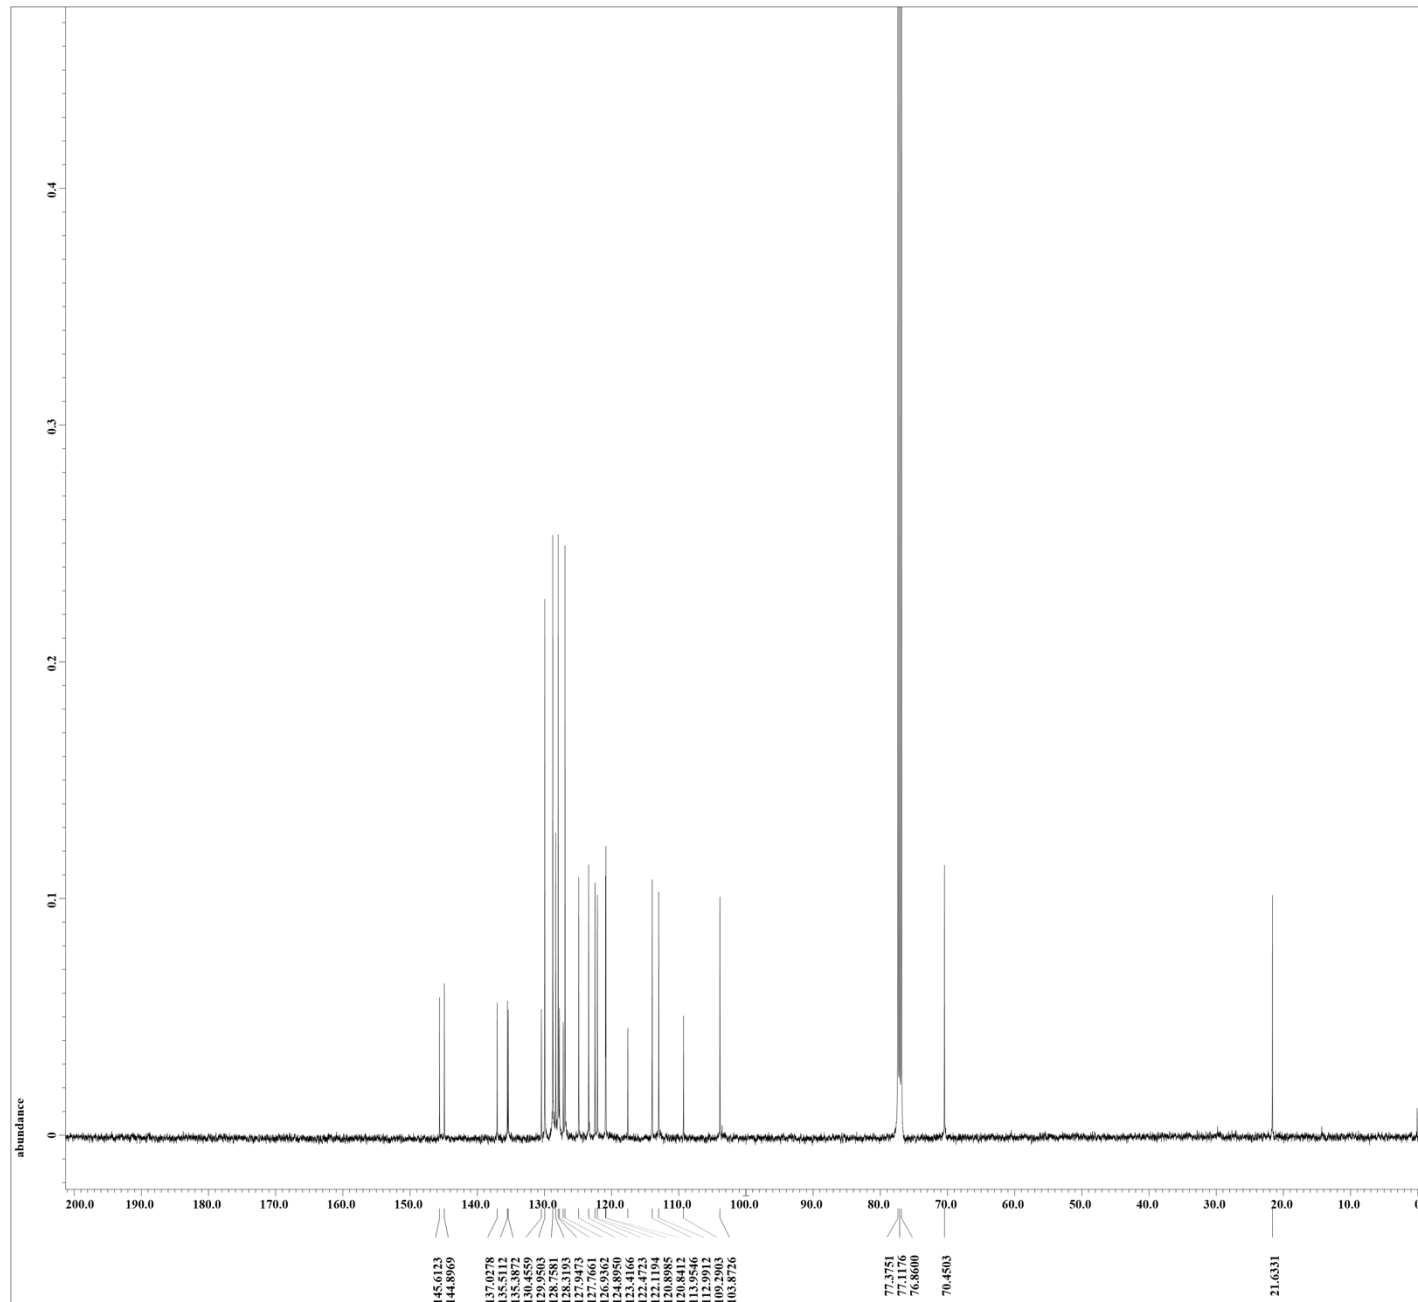

X : parts per Million : 13C





Filename = 7A200101-13.jdf  
 Author = delta  
 Experiment = single\_pulse.ex2  
 Sample\_id = S#661716  
 Solvent = CHLOROFORM-D  
 Creation\_time = 1-JAN-2020 17:33:51  
 Revision\_time = 1-FEB-2020 17:50:01  
 Current\_time = 1-FEB-2020 17:50:35

Content = single\_pulse  
 Data\_format = 1D\_COMPLEX  
 Dim\_size = 13107  
 Dim\_title = 1H  
 Dim\_units = [ppm]  
 Dimensions = X  
 Site = ECA 500  
 Spectrometer = DELTA2\_NMR

Field\_strength = 11.62926421[T] (500[M]  
 X\_acq\_duration = 1.76422912[s]  
 X\_domain = 1H  
 X\_freq = 495.13191398[MHz]  
 X\_offset = 5[ppm]  
 X\_points = 16384  
 X\_prescans = 1  
 X\_resolution = 0.5668198[Hz]  
 X\_sweep = 9.28677563[kHz]  
 Irr\_domain = 1H  
 Irr\_freq = 495.13191398[MHz]  
 Irr\_offset = 5[ppm]  
 Tri\_domain = 1H  
 Tri\_freq = 495.13191398[MHz]  
 Tri\_offset = 5[ppm]  
 Clipped = FALSE  
 Mod\_return = 1  
 Scans = 8  
 Total\_scans = 8

X\_90\_width = 11.3[us]  
 X\_acq\_time = 1.76422912[s]  
 X\_angle = 45[deg]  
 X\_atn = 3.3[db]  
 X\_pulse = 5.65[us]  
 Irr\_mode = Off  
 Tri\_mode = Off  
 Dante\_presat = FALSE  
 Initial\_wait = 1[s]  
 Recv\_gain = 50  
 Relaxation\_delay = 5[s]  
 Repetition\_time = 6.76422912[s]  
 Temp\_get = 23[dc]

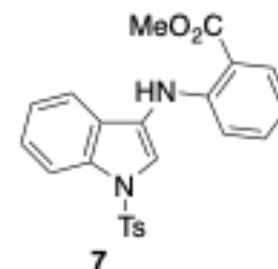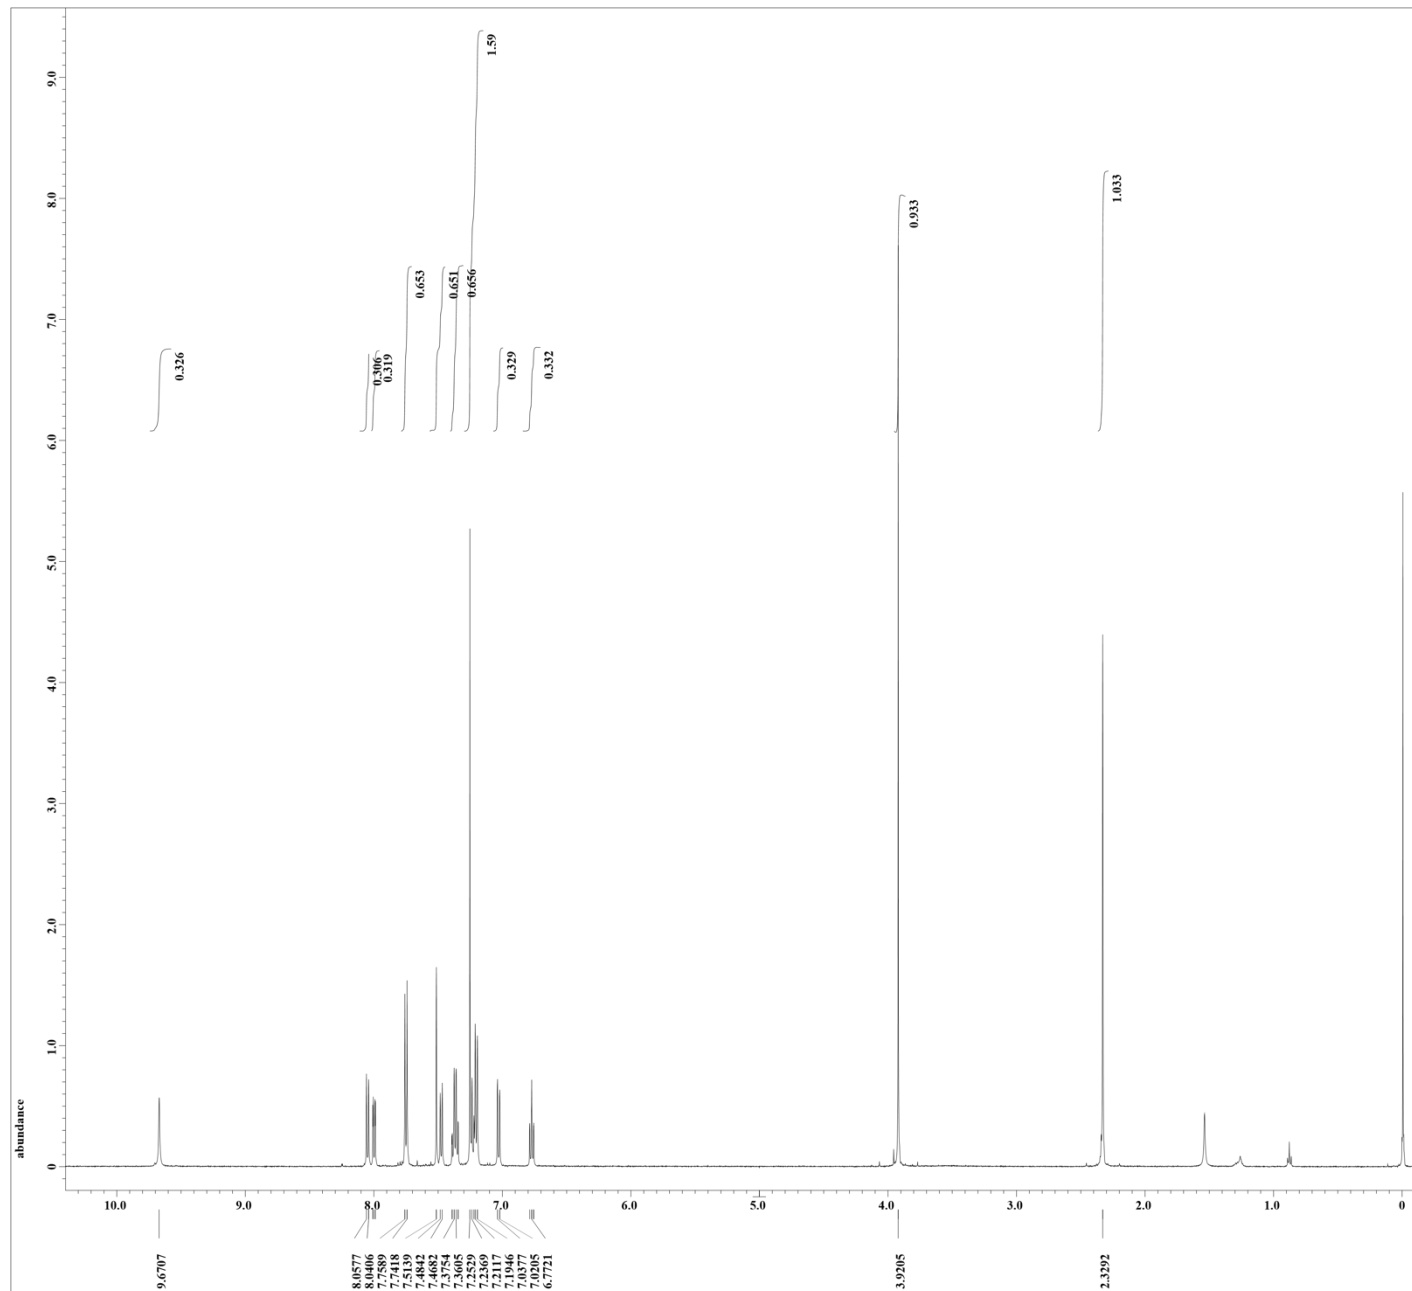

X : parts per Million : 1H



Filename = 7A200101-13.jdf  
 Author = delta  
 Experiment = single\_pulse\_dec  
 Sample\_id = S8736458  
 Solvent = CHLOROFORM-D  
 Creation\_time = 2-JAN-2020 10:42:35  
 Revision\_time = 1-FEB-2020 17:46:34  
 Current\_Time = 1-FEB-2020 17:47:10

Content = single\_pulse\_decouple  
 Data\_format = 1D\_COMPLEX  
 Dim\_size = 26214  
 Dim\_title = 13C  
 Dim\_units = [ppm]  
 Dimensions = X  
 Site = ECA 500  
 Spectrometer = DELTA2\_NMR

Field\_strength = 11.62926421[T] (500[M]  
 X\_acq\_duration = 0.8388608[s]  
 X\_domain = 13C  
 X\_freq = 124.5010059[MHz]  
 X\_offset = 100[ppm]  
 X\_points = 32768  
 X\_prescans = 4  
 X\_resolution = 1.1920929[Hz]  
 X\_sweep = 39.0625[kHz]  
 Irr\_domain = 1H  
 Irr\_freq = 495.13191398[MHz]  
 Irr\_offset = 5[ppm]  
 Clipped = FALSE  
 Mod\_return = 1  
 Scans = 19119  
 Total\_scans = 19119

X\_90\_width = 10.1[us]  
 X\_acq\_time = 0.8388608[s]  
 X\_angle = 30[deg]  
 X\_atn = 9.5[dB]  
 X\_pulse = 3.36666667[us]  
 Irr\_atn\_dec = 21.51[dB]  
 Irr\_atn\_noe = 21.51[dB]  
 Irr\_noise = WALTZ  
 Decoupling = TRUE  
 Initial\_wait = 1[s]  
 Noe = TRUE  
 Noe\_time = 2[s]  
 Recvr\_gain = 60  
 Relaxation\_delay = 2[s]  
 Repetition\_time = 2.8388608[s]  
 Temp\_get = 23.8[dc]

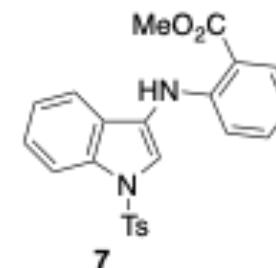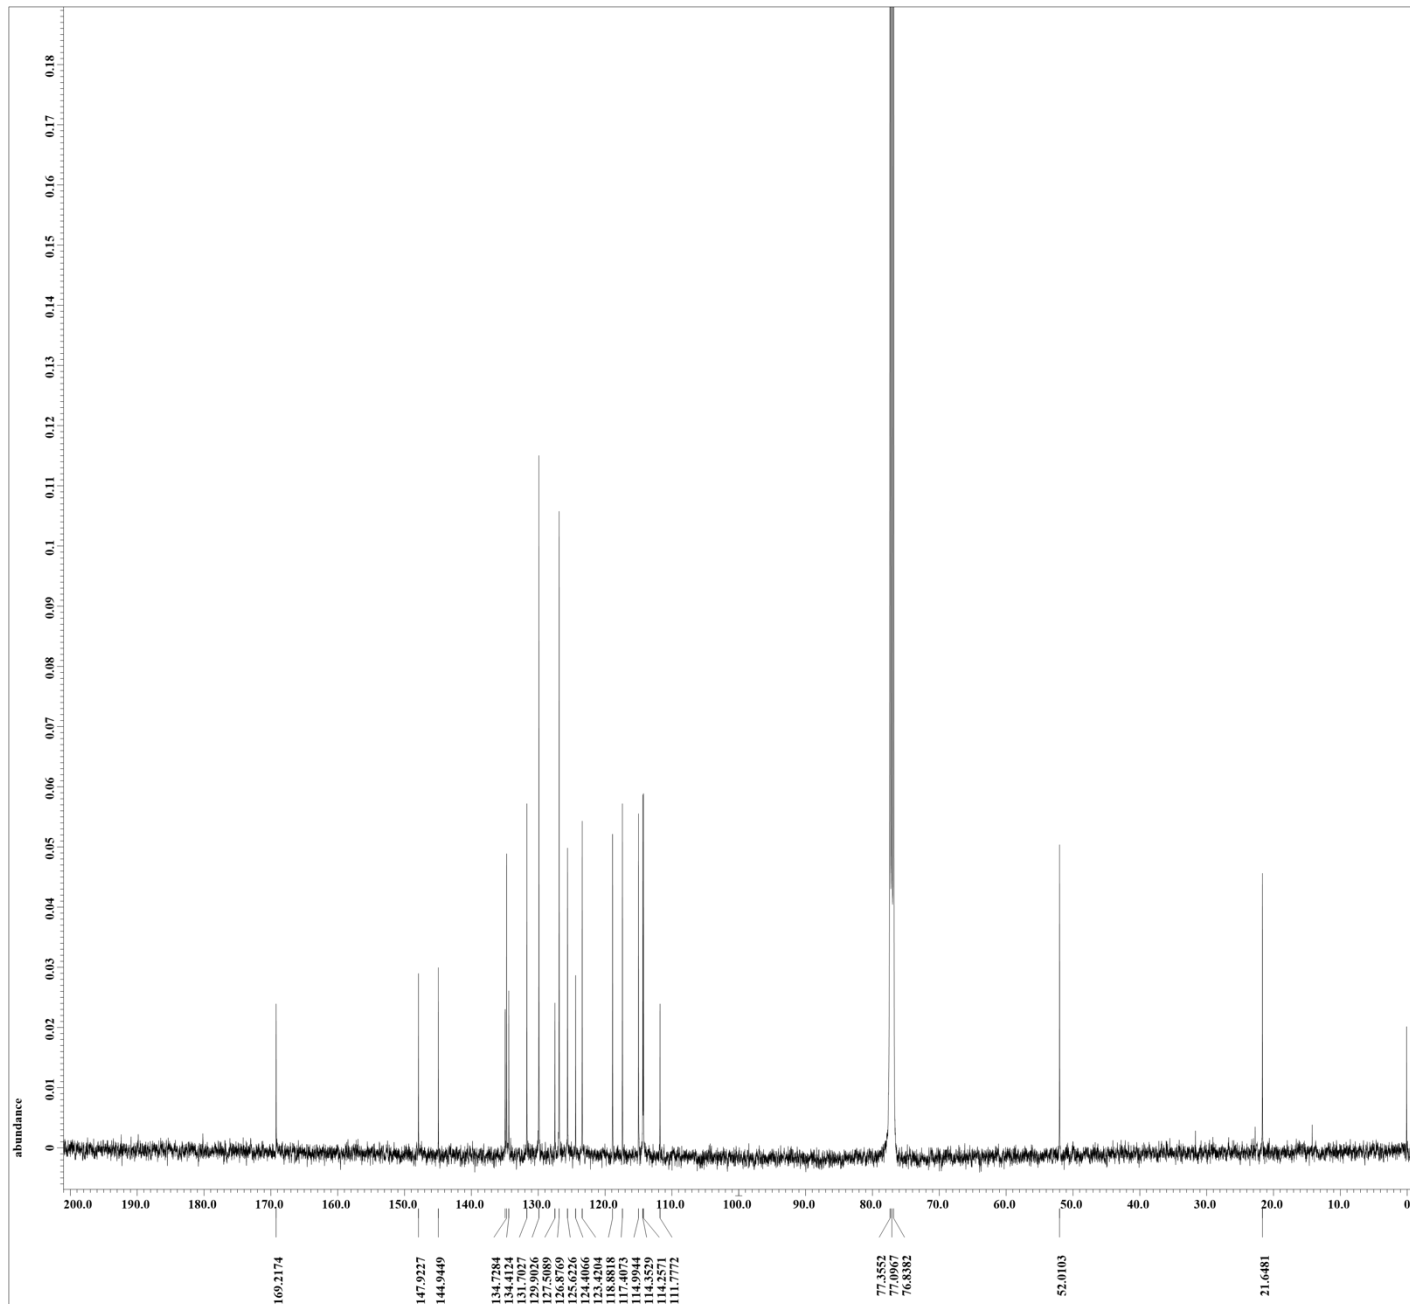

X : parts per Million : 13C



Filename = 7A200121-8.jdf  
 Author = delta  
 Experiment = single\_pulse.ex2  
 Sample\_id = S#667909  
 Solvent = CHLOROFORM-D  
 Creation\_time = 21-JAN-2020 17:41:41  
 Revision\_time = 1-FEB-2020 17:56:26  
 Current\_time = 1-FEB-2020 17:56:42

Content = single\_pulse  
 Data\_format = 1D\_COMPLEX  
 Dim\_size = 13107  
 Dim\_title = 1H  
 Dim\_units = [ppm]  
 Dimensions = X  
 Site = ECA 500  
 Spectrometer = DELTA2\_NMR

Field\_strength = 11.62926421[T] (500[M]  
 X\_acq\_duration = 1.76422912[s]  
 X\_domain = 1H  
 X\_freq = 495.13191398[MHz]  
 X\_offset = 5[ppm]  
 X\_points = 16384  
 X\_prescans = 1  
 X\_resolution = 0.5668198[Hz]  
 X\_sweep = 9.28677563[kHz]  
 Irr\_domain = 1H  
 Irr\_freq = 495.13191398[MHz]  
 Irr\_offset = 5[ppm]  
 Tri\_domain = 1H  
 Tri\_freq = 495.13191398[MHz]  
 Tri\_offset = 5[ppm]  
 Clipped = FALSE  
 Mod\_return = 1  
 Scans = 8  
 Total\_scans = 8

X\_90\_width = 11.3[us]  
 X\_acq\_time = 1.76422912[s]  
 X\_angle = 45[deg]  
 X\_atn = 3.3[db]  
 X\_pulse = 5.65[us]  
 Irr\_mode = Off  
 Tri\_mode = Off  
 Dante\_presat = FALSE  
 Initial\_wait = 1[s]  
 Recv\_gain = 46  
 Relaxation\_delay = 5[s]  
 Repetition\_time = 6.76422912[s]  
 Temp\_get = 23.5[dc]

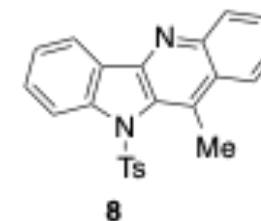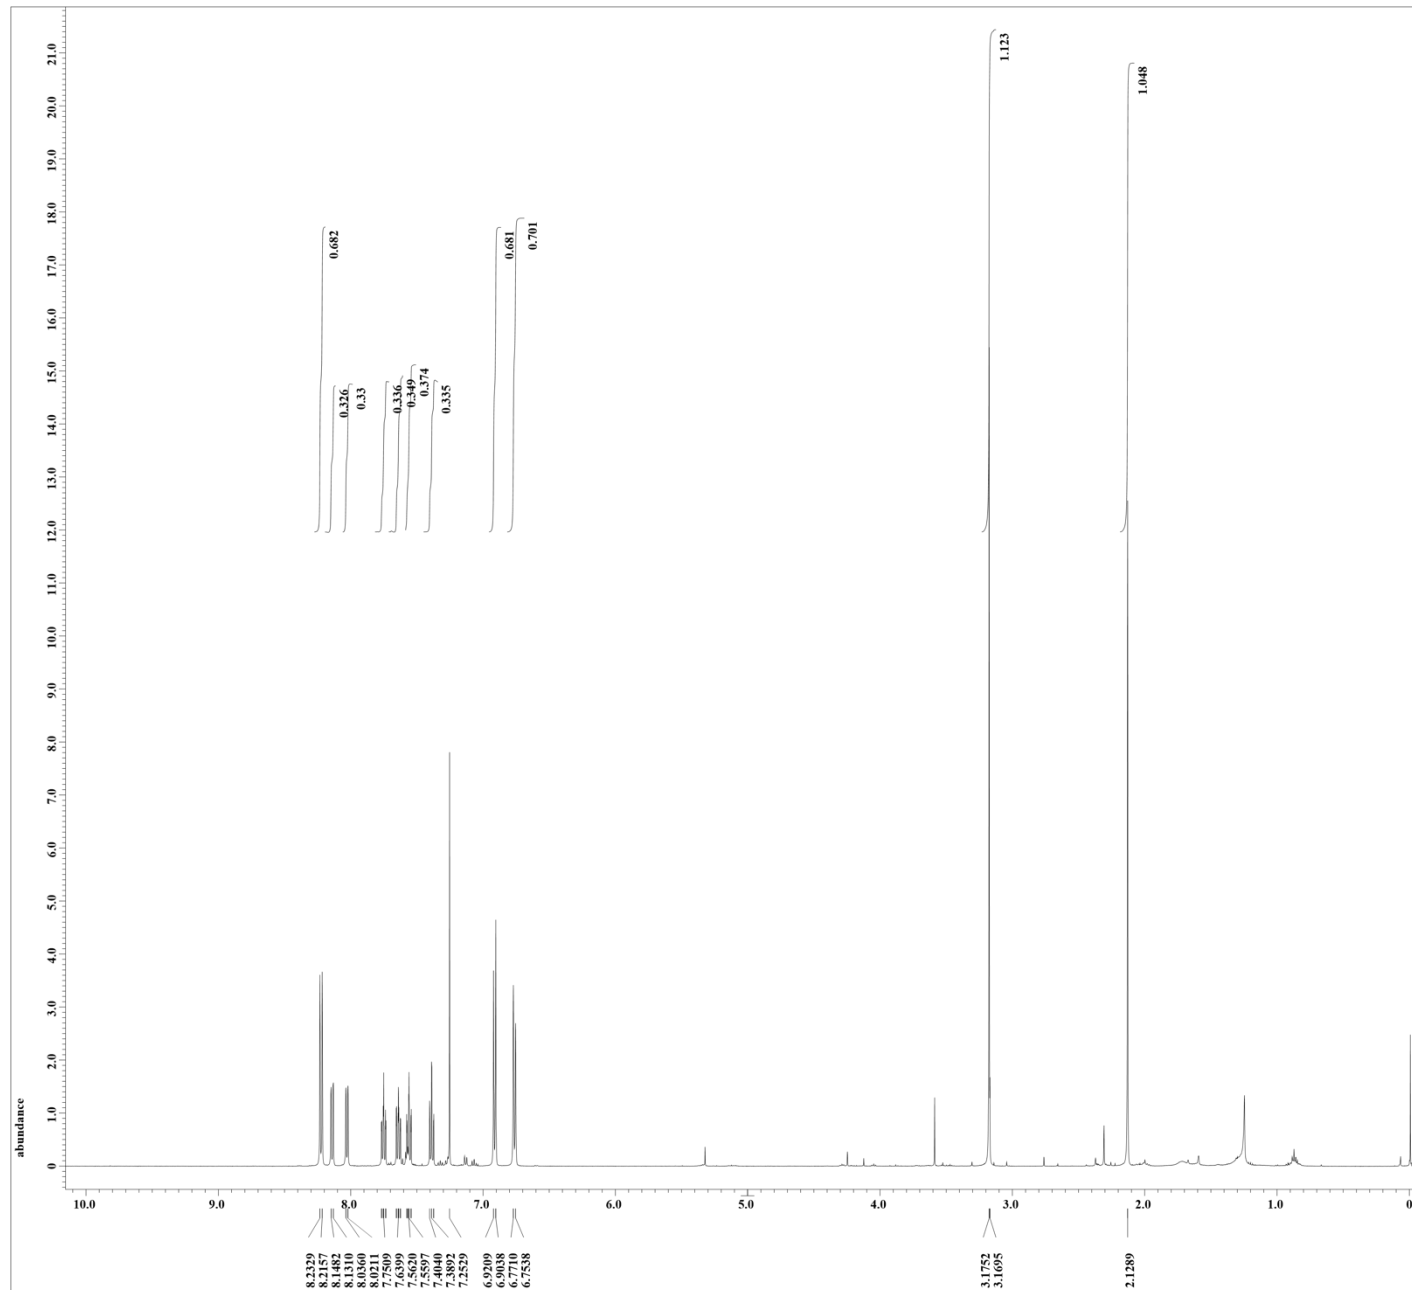

X : parts per Million : 1H



Filename = 7A200121-6.jdf  
 Author = delta  
 Experiment = single\_pulse\_dec  
 Sample\_id = S#669662  
 Solvent = CHLOROFORM-D  
 Creation\_time = 22-JAN-2020 06:36:34  
 Revision\_time = 1-FEB-2020 17:56:59  
 Current\_time = 1-FEB-2020 17:57:39

Content = single\_pulse\_decouple  
 Data\_format = 1D\_COMPLEX  
 Dim\_size = 26214  
 Dim\_title = 13C  
 Dim\_units = [ppm]  
 Dimensions = X  
 Site = ECA 500  
 Spectrometer = DELTA2\_NMR

Field\_strength = 11.62926421[T] (500[M]  
 X\_acq\_duration = 0.8388608[s]  
 X\_domain = 13C  
 X\_freq = 124.5010059[MHz]  
 X\_offset = 100[ppm]  
 X\_points = 32768  
 X\_prescans = 4  
 X\_resolution = 1.1920929[Hz]  
 X\_sweep = 39.0625[kHz]  
 Irr\_domain = 1H  
 Irr\_freq = 495.13191398[MHz]  
 Irr\_offset = 5[ppm]  
 Clipped = FALSE  
 Mod\_return = 1  
 Scans = 16337  
 Total\_scans = 16337

X\_90\_width = 10.1[us]  
 X\_acq\_time = 0.8388608[s]  
 X\_angle = 30[deg]  
 X\_atn = 9.5[dB]  
 X\_pulse = 3.36666667[us]  
 Irr\_atn\_dec = 21.51[dB]  
 Irr\_atn\_noe = 21.51[dB]  
 Irr\_noise = WALTZ  
 Decoupling = TRUE  
 Initial\_wait = 1[s]  
 Noe = TRUE  
 Noe\_time = 2[s]  
 Recv\_gain = 60  
 Relaxation\_delay = 2[s]  
 Repetition\_time = 2.8388608[s]  
 Temp\_get = 24.1[dc]

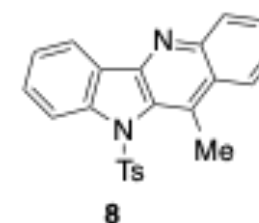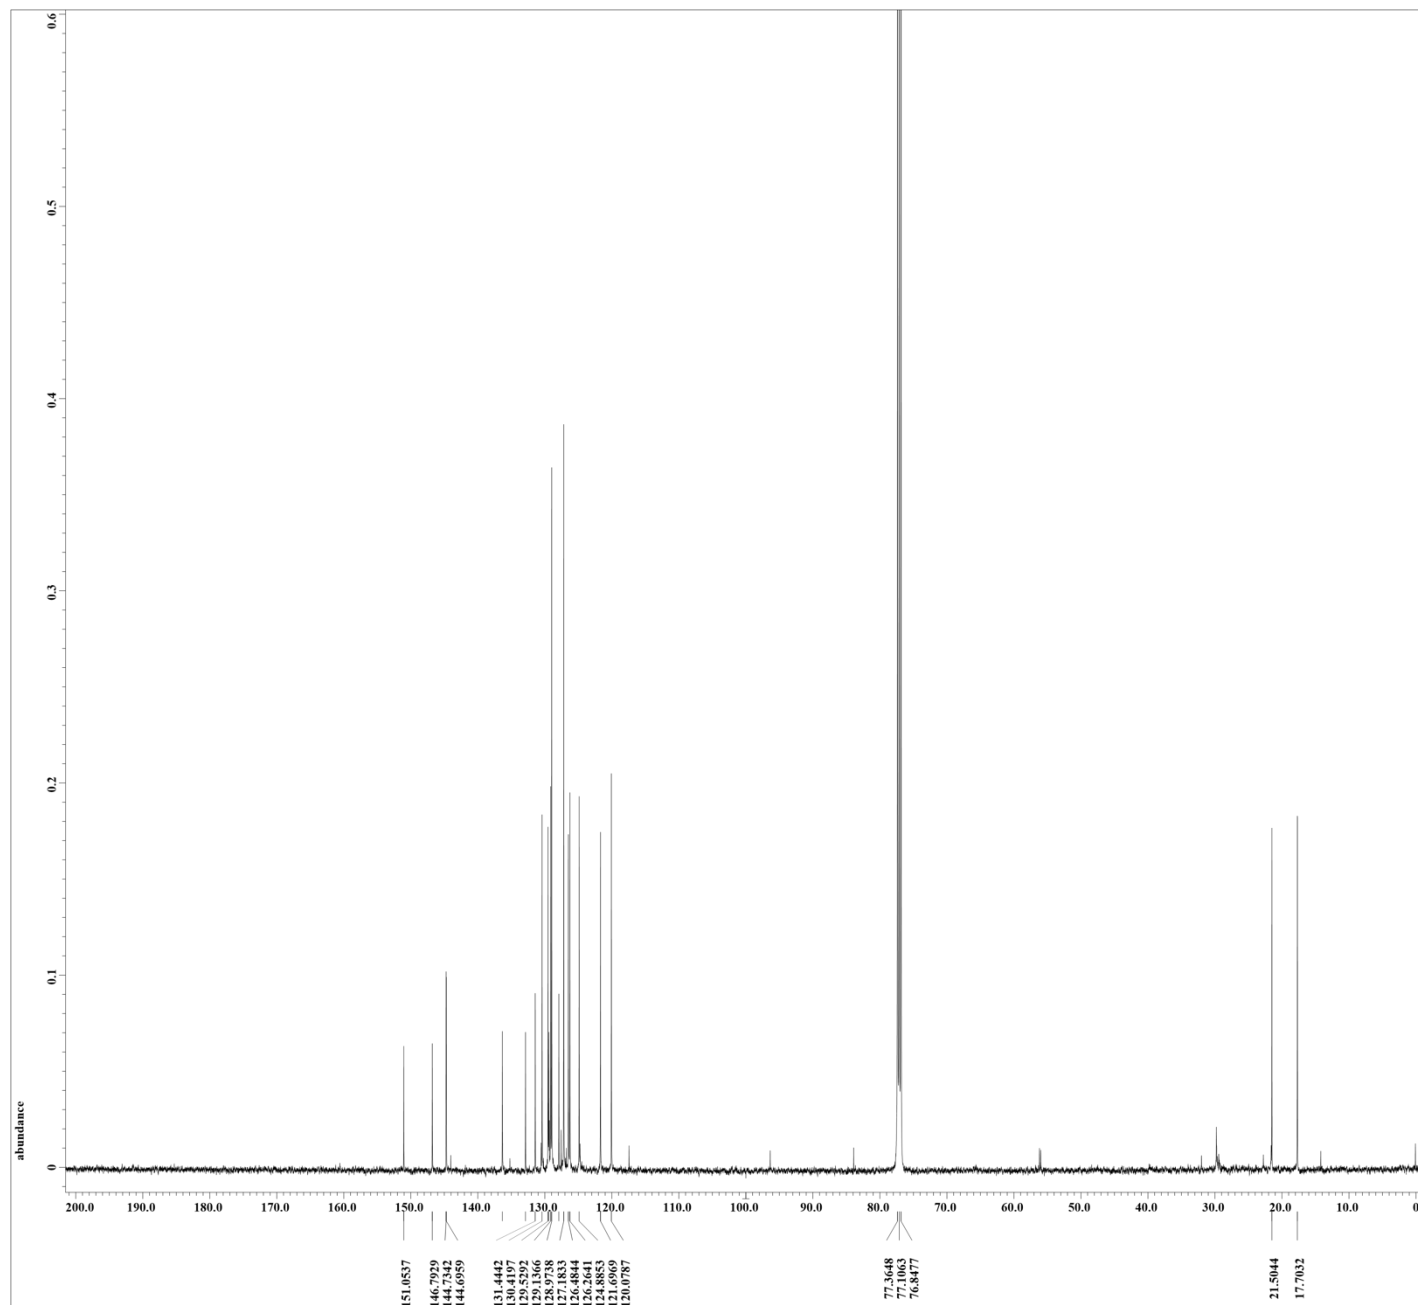

X : parts per Million : 13C



Filename = 7A200122-10.jdf  
 Author = delta  
 Experiment = single\_pulse.ex2  
 Sample\_id = S8325349  
 Solvent = CHLOROFORM-D  
 Creation\_time = 22-JAN-2020 08:10:13  
 Revision\_time = 1-FEB-2020 17:42:25  
 Current\_time = 1-FEB-2020 17:42:55

Content = single\_pulse  
 Data\_format = 1D\_COMPLEX  
 Dim\_size = 13107  
 Dim\_title = 1H  
 Dim\_units = [ppm]  
 Dimensions = X  
 Site = ECA 500  
 Spectrometer = DELTA2\_NMR

Field\_strength = 11.62926421[T] (500[M]  
 X\_acq\_duration = 1.76422912[s]  
 X\_domain = 1H  
 X\_freq = 495.13191398[MHz]  
 X\_offset = 5[ppm]  
 X\_points = 16384  
 X\_prescans = 1  
 X\_resolution = 0.5668198[Hz]  
 X\_sweep = 9.28677563[kHz]  
 Irr\_domain = 1H  
 Irr\_freq = 495.13191398[MHz]  
 Irr\_offset = 5[ppm]  
 Tri\_domain = 1H  
 Tri\_freq = 495.13191398[MHz]  
 Tri\_offset = 5[ppm]  
 Clipped = FALSE  
 Mod\_return = 1  
 Scans = 8  
 Total\_scans = 8

X\_90\_width = 11.3[us]  
 X\_acq\_time = 1.76422912[s]  
 X\_angle = 45[deg]  
 X\_atn = 3.3[dB]  
 X\_pulse = 5.65[us]  
 Irr\_mode = Off  
 Tri\_mode = Off  
 Dante\_presat = FALSE  
 Initial\_wait = 1[s]  
 Recvz\_gain = 48  
 Relaxation\_delay = 5[s]  
 Repetition\_time = 6.76422912[s]  
 Temp\_get = 23.6[dc]

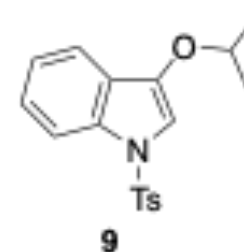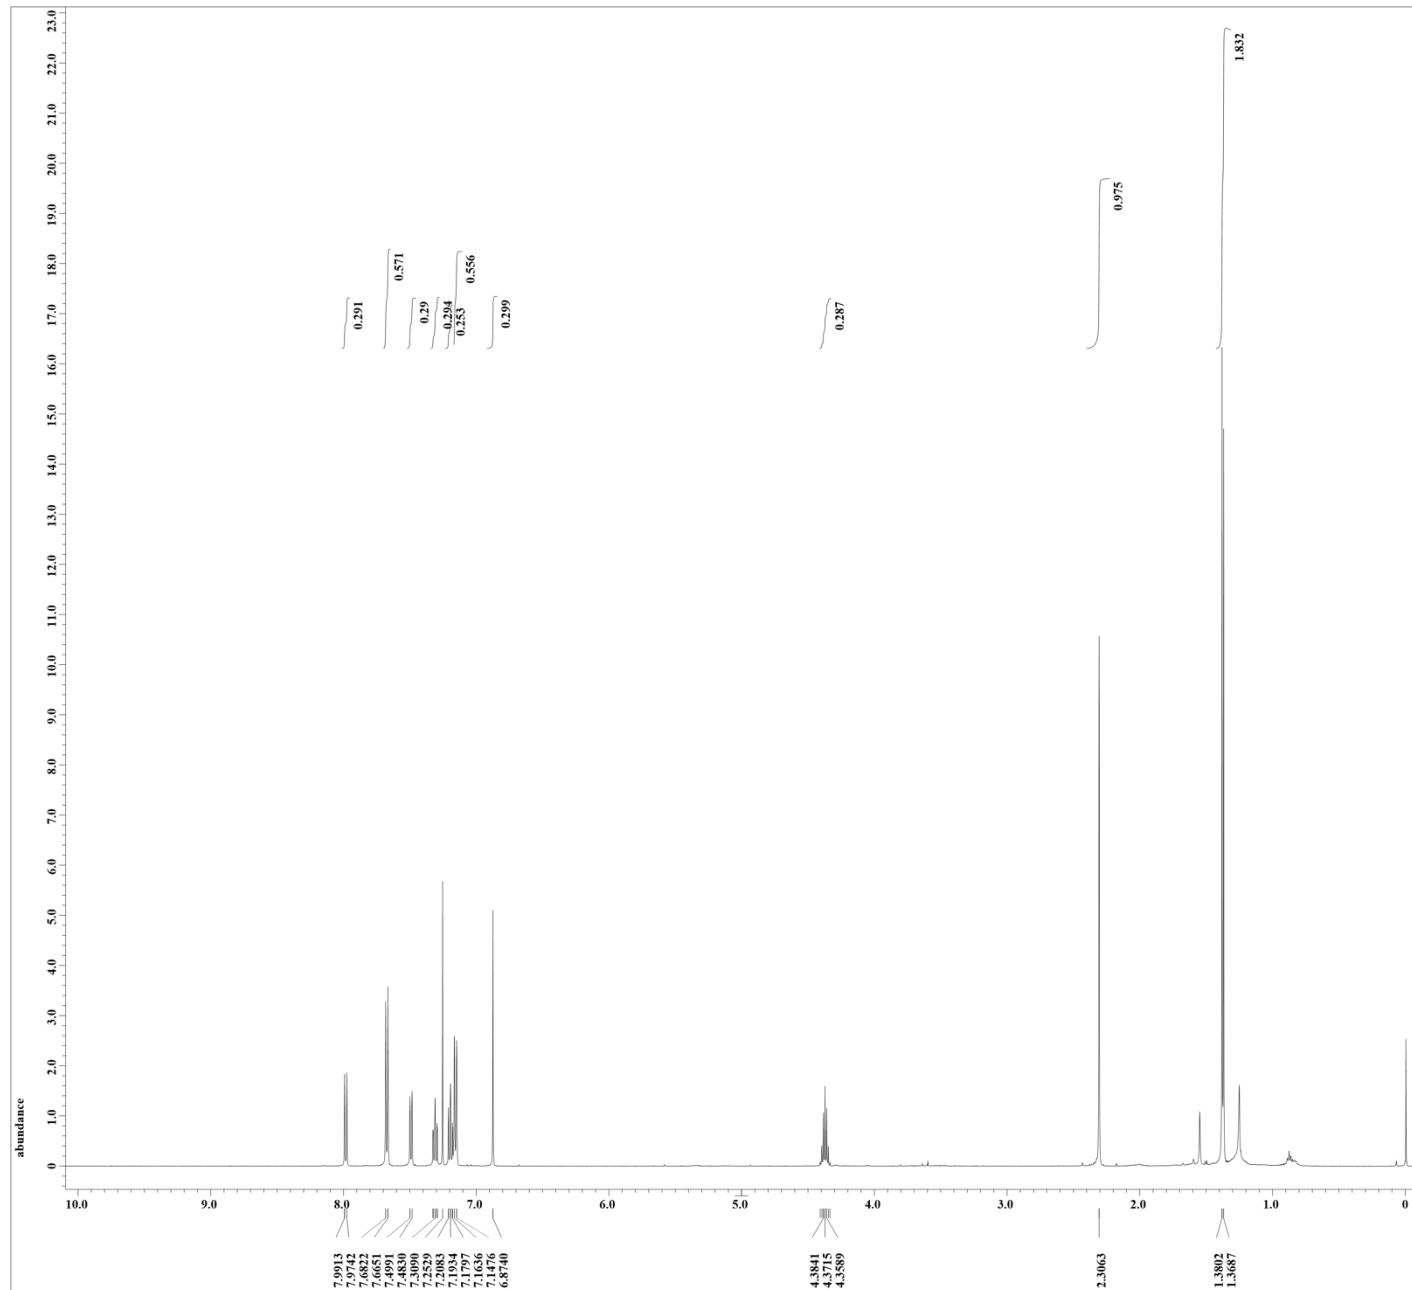

X : parts per Million : 1H



Filename = 7A200122-8.jdf  
Author = delta  
Experiment = single\_pulse\_dec  
Sample\_id = S8326587  
Solvent = CHLOROFORM-D  
Creation\_time = 22-JAN-2020 10:10:35  
Revision\_time = 1-FEB-2020 17:35:43  
Current\_time = 1-FEB-2020 17:36:50

Content = single\_pulse\_decouple  
Data\_format = 1D\_COMPLEX  
Dim\_size = 26214  
Dim\_title = 13C  
Dim\_units = [ppm]  
Dimensions = X  
Site = ECA 500  
Spectrometer = DELTA2\_NMR

Field\_strength = 11.62926421[T] (500[M]  
X\_acq\_duration = 0.8388608[s]  
X\_domain = 13C  
X\_freq = 124.5010059[MHz]  
X\_offset = 100[ppm]  
X\_points = 32768  
X\_prescans = 4  
X\_resolution = 1.1920929[Hz]  
X\_sweep = 39.0625[kHz]  
Irr\_domain = 1H  
Irr\_freq = 495.13191398[MHz]  
Irr\_offset = 5[ppm]  
Clipped = TRUE  
Mod\_return = 1  
Scans = 2513  
Total\_scans = 2513

X\_90\_width = 10.1[us]  
X\_acq\_time = 0.8388608[s]  
X\_angle = 30[deg]  
X\_atn = 9.5[dB]  
X\_pulse = 3.36666667[us]  
Irr\_atn\_dec = 21.51[dB]  
Irr\_atn\_noe = 21.51[dB]  
Irr\_noise = WALTZ  
Decoupling = TRUE  
Initial\_wait = 1[s]  
Noe = TRUE  
Noe\_time = 2[s]  
Recvr\_gain = 60  
Relaxation\_delay = 2[s]  
Repetition\_time = 2.8388608[s]  
Temp\_get = 24.4[dc]

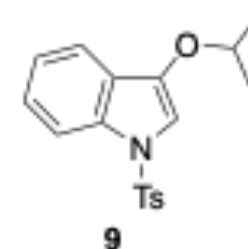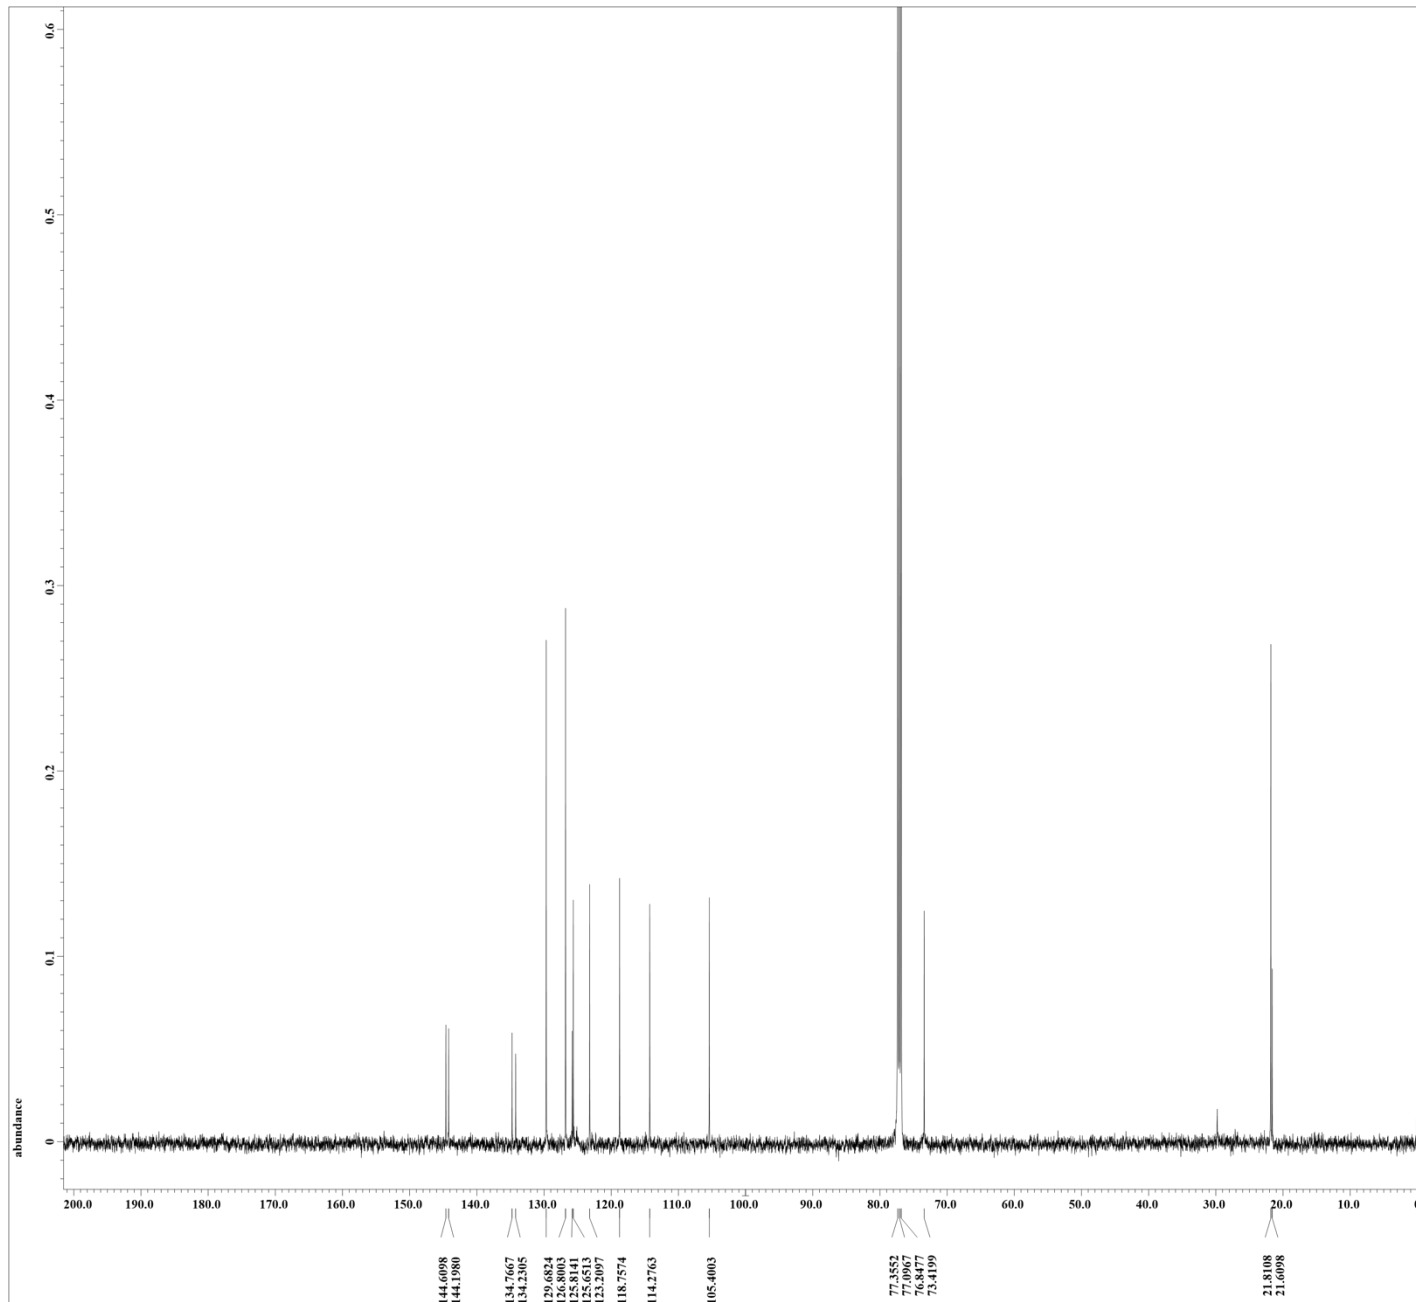

X : parts per Million : 13C



Filename = 7A191126-12.jdf  
 Author = delta  
 Experiment = single\_pulse.ex2  
 Sample\_id = S8395871  
 Solvent = CHLOROFORM-D  
 Creation\_time = 26-NOV-2019 10:15:49  
 Revision\_time = 1-FEB-2020 17:20:04  
 Current\_time = 1-FEB-2020 17:20:37

Content = single\_pulse  
 Data format = 1D COMPLEX  
 Dim\_size = 13107  
 Dim\_title = 1H  
 Dim\_units = [ppm]  
 Dimensions = X  
 Site = ECA 500  
 Spectrometer = DELTA2\_NMR

Field\_strength = 11.62926421[T] (500[M]  
 X\_acq\_duration = 1.76422912[s]  
 X\_domain = 1H  
 X\_freq = 495.13191398[MHz]  
 X\_offset = 5[ppm]  
 X\_points = 16384  
 X\_prescans = 1  
 X\_resolution = 0.5668198[Hz]  
 X\_sweep = 9.28677563[kHz]  
 Irr\_domain = 1H  
 Irr\_freq = 495.13191398[MHz]  
 Irr\_offset = 5[ppm]  
 Tri\_domain = 1H  
 Tri\_freq = 495.13191398[MHz]  
 Tri\_offset = 5[ppm]  
 Clipped = FALSE  
 Mod\_return = 1  
 Scans = 8  
 Total\_scans = 8

X\_90\_width = 11.3[us]  
 X\_acq\_time = 1.76422912[s]  
 X\_angle = 45[deg]  
 X\_atn = 3.3[db]  
 X\_pulse = 5.65[us]  
 Irr\_mode = Off  
 Tri\_mode = Off  
 Dante\_presat = FALSE  
 Initial\_wait = 1[s]  
 Recvz\_gain = 50  
 Relaxation\_delay = 5[s]  
 Repetition\_time = 6.76422912[s]  
 Temp\_get = 23.4[dc]

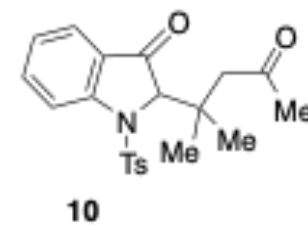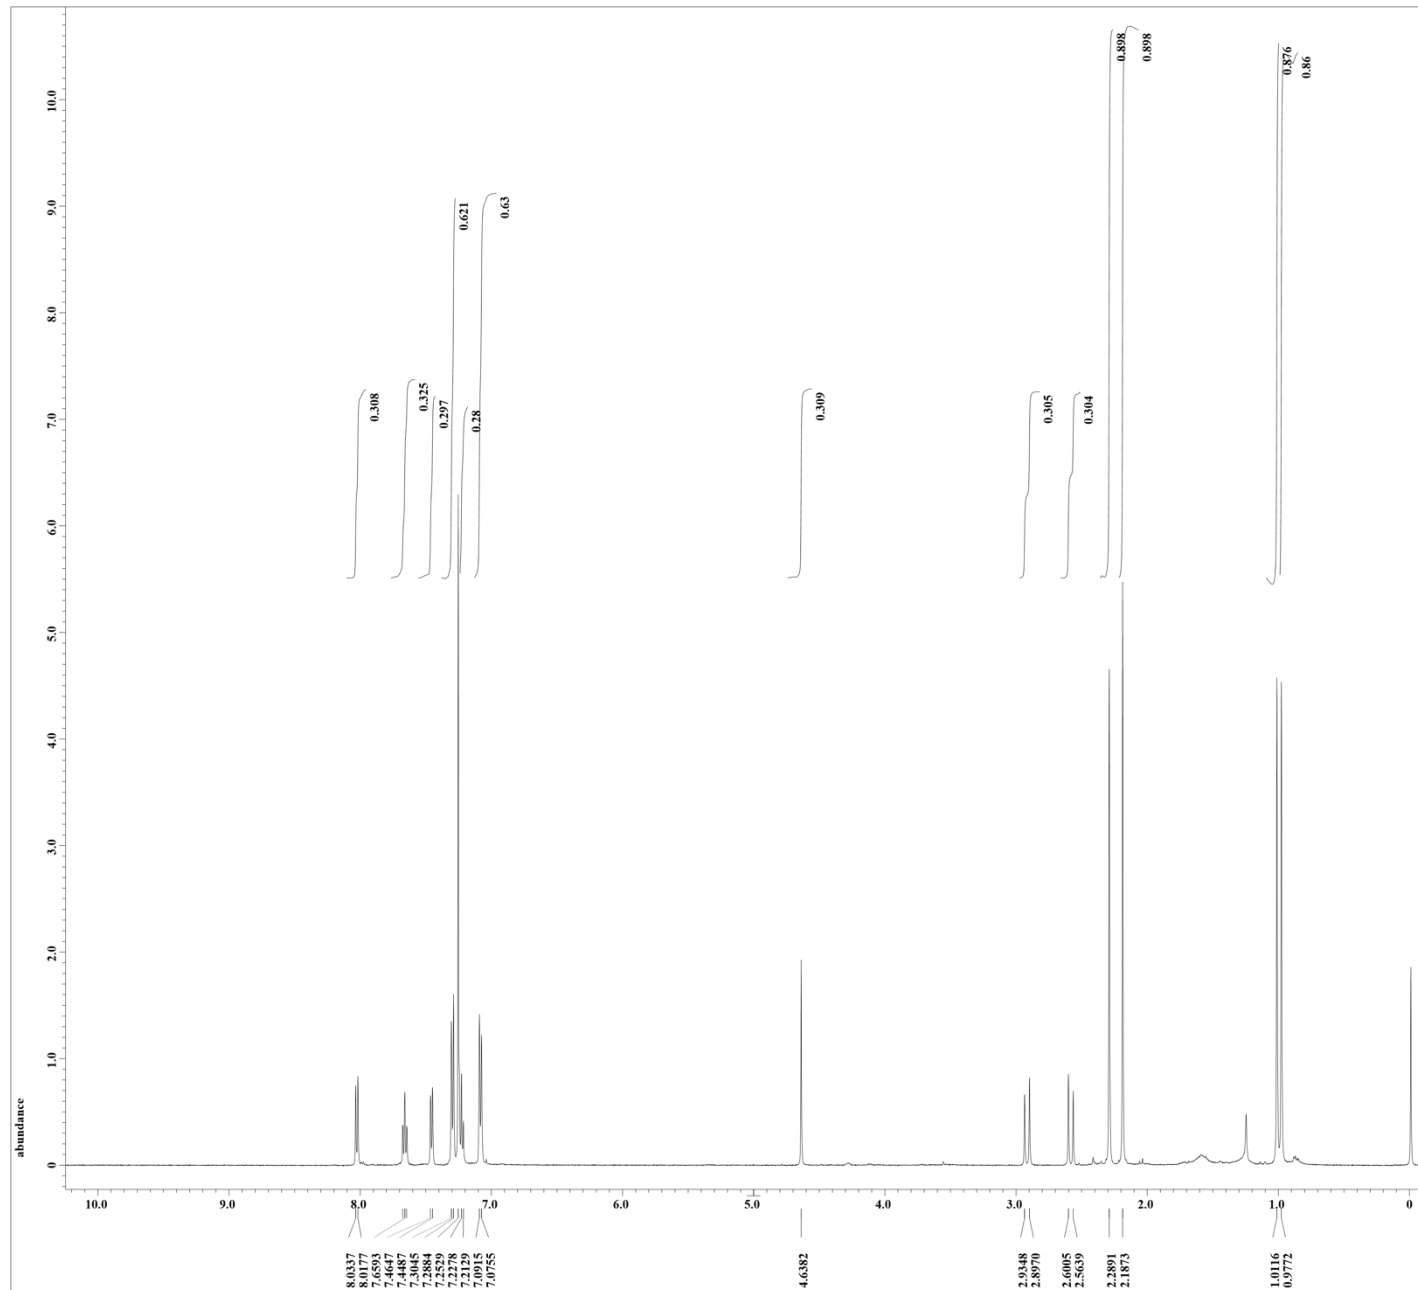

X : parts per Million : 1H



Filename = 7A191126-11.jdf  
 Author = delta  
 Experiment = single\_pulse\_dec  
 Sample\_id = S#633866  
 Solvent = CHLOROFORM-D  
 Creation\_time = 27-NOV-2019 07:20:44  
 Revision\_time = 1-FEB-2020 17:16:02  
 Current\_time = 1-FEB-2020 17:17:18

Content = single\_pulse\_decouple  
 Data\_format = 1D\_COMPLEX  
 Dim\_size = 26214  
 Dim\_title = 13C  
 Dim\_units = [ppm]  
 Dimensions = X  
 Site = ECA 500  
 Spectrometer = DELTA2\_NMR

Field\_strength = 11.62926421[T] (500[M]  
 X\_acq\_duration = 0.8388608[s]  
 X\_domain = 13C  
 X\_freq = 124.5010059[MHz]  
 X\_offset = 100[ppm]  
 X\_points = 32768  
 X\_prescans = 4  
 X\_resolution = 1.1920929[Hz]  
 X\_sweep = 39.0625[kHz]  
 Irr\_domain = 1H  
 Irr\_freq = 495.13191398[MHz]  
 Irr\_offset = 5[ppm]  
 Clipped = FALSE  
 Mod\_return = 1  
 Scans = 18355  
 Total\_scans = 18355

X\_90\_width = 10.1[us]  
 X\_acq\_time = 0.8388608[s]  
 X\_angle = 30[deg]  
 X\_atn = 9.5[dB]  
 X\_pulse = 3.36666667[us]  
 Irr\_atn\_dec = 21.51[dB]  
 Irr\_atn\_noe = 21.51[dB]  
 Irr\_noise = WALTZ  
 Decoupling = TRUE  
 Initial\_wait = 1[s]  
 Noe = TRUE  
 Noe\_time = 2[s]  
 Recvr\_gain = 60  
 Relaxation\_delay = 2[s]  
 Repetition\_time = 2.8388608[s]  
 Temp\_get = 24.5[dc]

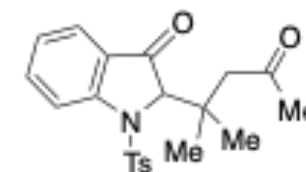

10

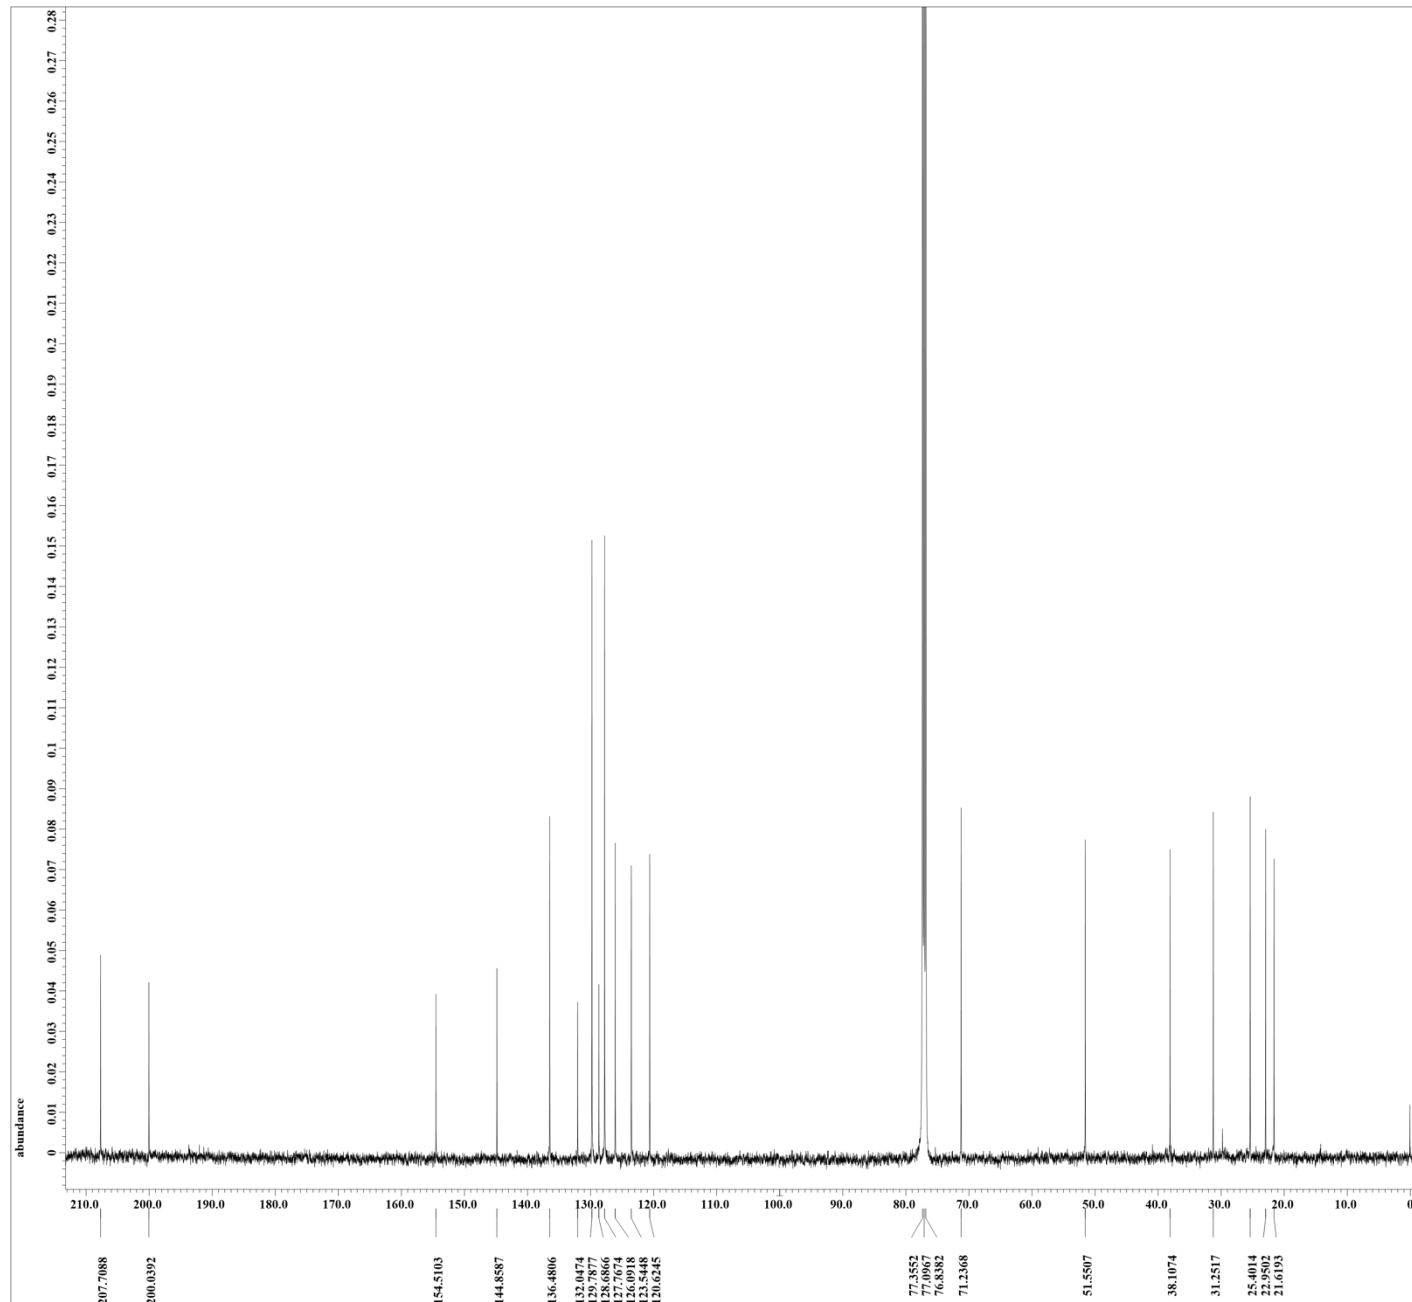

X : parts per Million : 13C



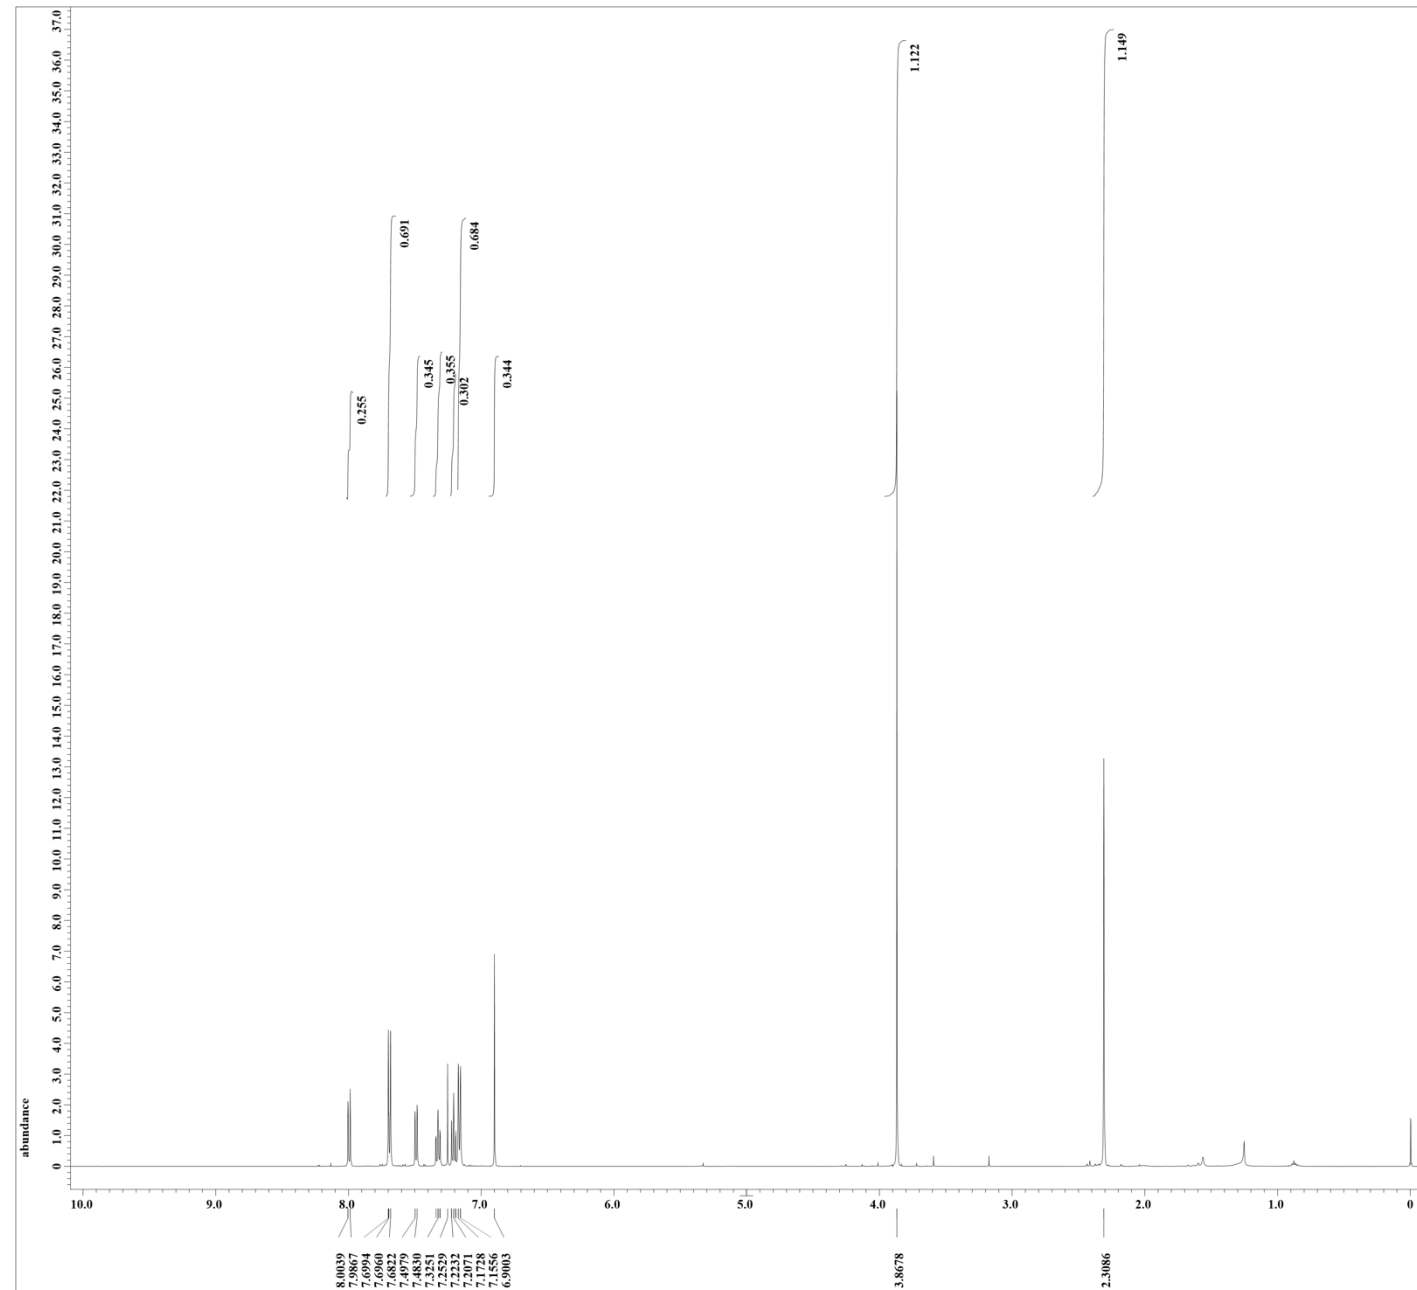

X : parts per Million : 1H



Filename = 7A200114-12.jdf  
 Author = delta  
 Experiment = single\_pulse.ex2  
 Sample\_id = S#562957  
 Solvent = CHLOROFORM-D  
 Creation\_time = 14-JAN-2020 14:47:54  
 Revision\_time = 1-FEB-2020 18:11:13  
 Current\_time = 1-FEB-2020 18:11:33

Content = single\_pulse  
 Data\_format = 1D\_COMPLEX  
 Dim\_size = 13107  
 Dim\_title = 1H  
 Dim\_units = [ppm]  
 Dimensions = X  
 Site = ECA 500  
 Spectrometer = DELTA2\_NMR

Field\_strength = 11.62926421 [T] (500[M]  
 X\_acq\_duration = 1.76422912 [s]  
 X\_domain = 1H  
 X\_freq = 495.13191398 [MHz]  
 X\_offset = 5 [ppm]  
 X\_points = 16384  
 X\_prescans = 1  
 X\_resolution = 0.5668198 [Hz]  
 X\_sweep = 9.28677563 [kHz]  
 Irr\_domain = 1H  
 Irr\_freq = 495.13191398 [MHz]  
 Irr\_offset = 5 [ppm]  
 Tri\_domain = 1H  
 Tri\_freq = 495.13191398 [MHz]  
 Tri\_offset = 5 [ppm]  
 Clipped = FALSE  
 Mod\_return = 1  
 Scans = 8  
 Total\_scans = 8

X\_90\_width = 11.3 [us]  
 X\_acq\_time = 1.76422912 [s]  
 X\_angle = 45 [deg]  
 X\_atn = 3.3 [dB]  
 X\_pulse = 5.65 [us]  
 Irr\_mode = Off  
 Tri\_mode = Off  
 Dante\_presat = FALSE  
 Initial\_wait = 1 [s]  
 Recvz\_gain = 44  
 Relaxation\_delay = 5 [s]  
 Repetition\_time = 6.76422912 [s]  
 Temp\_get = 23.4 [dC]

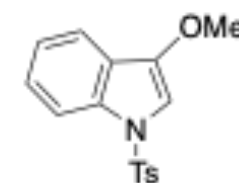

11

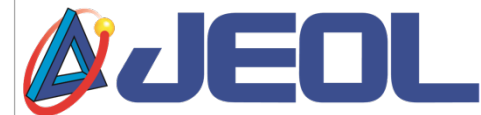

Filename = 7A200114-12.jdf  
Author = delta  
Experiment = single\_pulse\_dec  
Sample\_id = S#626862  
Solvent = CHLOROFORM-D  
Creation\_time = 15-JAN-2020 07:53:21  
Revision\_time = 1-FEB-2020 18:07:32  
Current\_time = 1-FEB-2020 18:08:09

Content = single\_pulse\_decouple  
Data\_format = 1D\_COMPLEX  
Dim\_size = 26214  
Dim\_title = 13C  
Dim\_units = [ppm]  
Dimensions = X  
Site = ECA 500  
Spectrometer = DELTA2\_NMR

Field\_strength = 11.62926421[T] (500[M]  
X\_acq\_duration = 0.8388608[s]  
X\_domain = 13C  
X\_freq = 124.5010059[MHz]  
X\_offset = 100[ppm]  
X\_points = 32768  
X\_prescans = 4  
X\_resolution = 1.1920929[Hz]  
X\_sweep = 39.0625[kHz]  
Irr\_domain = 1H  
Irr\_freq = 495.13191398[MHz]  
Irr\_offset = 5[ppm]  
Clipped = FALSE  
Mod\_return = 1  
Scans = 19444  
Total\_scans = 19444

X\_90\_width = 10.1[us]  
X\_acq\_time = 0.8388608[s]  
X\_angle = 30[deg]  
X\_atn = 9.5[dB]  
X\_pulse = 3.36666667[us]  
Irr\_atn\_dec = 21.51[dB]  
Irr\_atn\_noe = 21.51[dB]  
Irr\_noise = WALTZ  
Decoupling = TRUE  
Initial\_wait = 1[s]  
Noe = TRUE  
Noe\_time = 2[s]  
Recvr\_gain = 60  
Relaxation\_delay = 2[s]  
Repetition\_time = 2.8388608[s]  
Temp\_get = 24.1[dc]

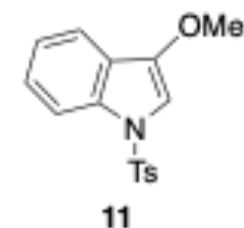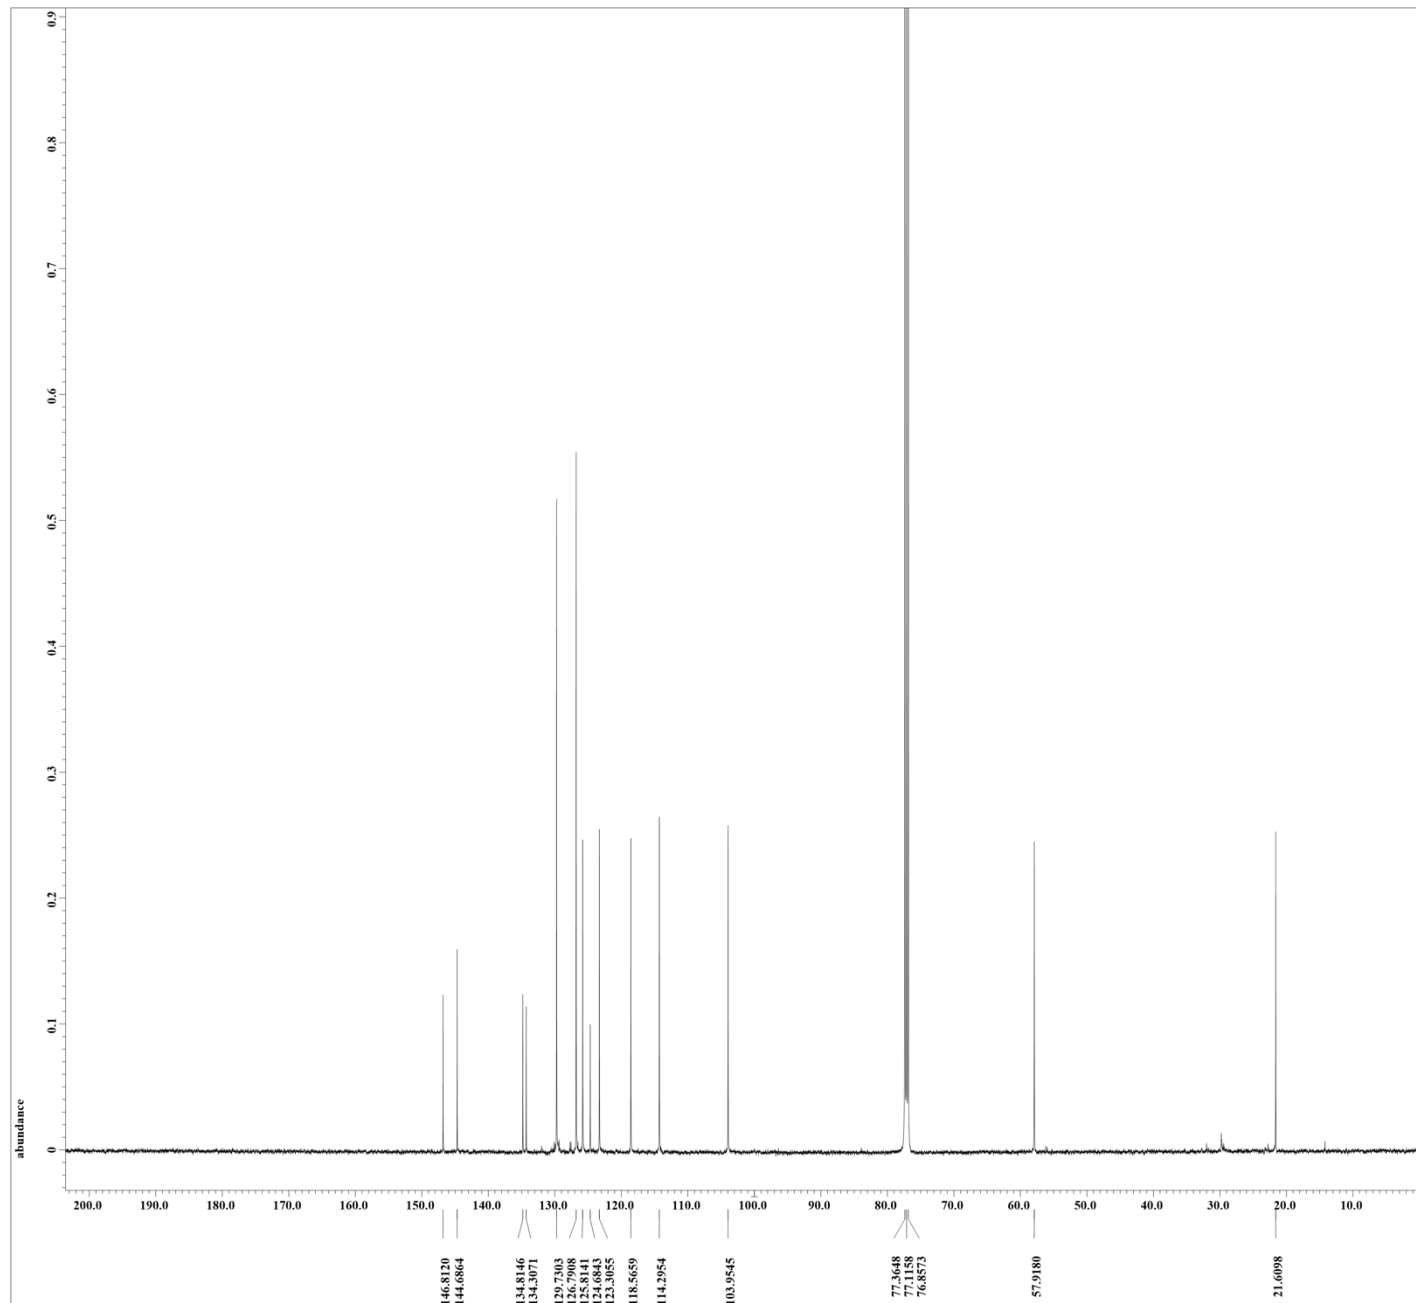

X : parts per Million : 13C



----- PROCESSING PARAMETERS -----  
dc balance : 0 : FALSE  
seXP : 0.2[Hz] : 0.0[s]  
trapezoid3 : 0[%] : 80[%] : 100[%]  
zerofill : 1  
fft : 1 : TRUE : TRUE  
machinephase  
ppm  
Derived from: TA2020-0118-1.jdf

Filename = TA2020-0118-6.jdf  
Author = delta  
Experiment = single\_pulse.ex2  
Sample\_id = S8589067  
Solvent = CHLOROFORM-D  
Creation\_time = 4-APR-2000 18:10:42  
Revision\_time = 1-FEB-2020 17:35:56  
Current\_time = 1-FEB-2020 17:36:14  
  
Comment = single\_pulse  
Data\_format = 1D\_COMPLEX  
Dim\_Time = 13107  
Dim\_title = 1H  
Dim\_units = [ppm]  
Dimensions = X  
Site = ECA500  
Spectrometer = DELTA2\_NMR  
  
Field\_strength = 11.7473579[T] (500[MH  
X\_acq\_duration = 1.74587904[s]  
X\_domain = 1H  
X\_freq = 500.15991521[MHz]  
X\_offset = 5.0[ppm]  
X\_points = 16384  
X\_prescans = 1  
X\_resolution = 0.57277737[Hz]  
X\_sweep = 9.38438438[kHz]  
Irr\_domain = 1H  
Irr\_freq = 500.15991521[MHz]  
Irr\_offset = 5.0[ppm]  
Tri\_domain = 1H  
Tri\_freq = 500.15991521[MHz]  
Tri\_offset = 5.0[ppm]  
Clipped = FALSE  
Mod\_return = 1  
Scans = 8  
Total\_scans = 8  
  
X\_90\_width = 12[us]  
X\_acq\_time = 1.74587904[s]  
X\_angle = 45[deg]  
X\_atn = 3.4[dB]  
X\_pulse = 6[us]  
Irr\_mode = Off  
Tri\_mode = Off  
Dante\_presat = FALSE  
Initial\_wait = 1[s]  
Recvr\_gain = 50  
Relaxation\_delay = 5[s]  
Repetition\_time = 6.74587904[s]  
Temp\_get = 24.1[dc]

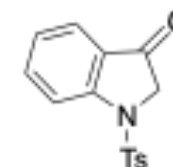

12

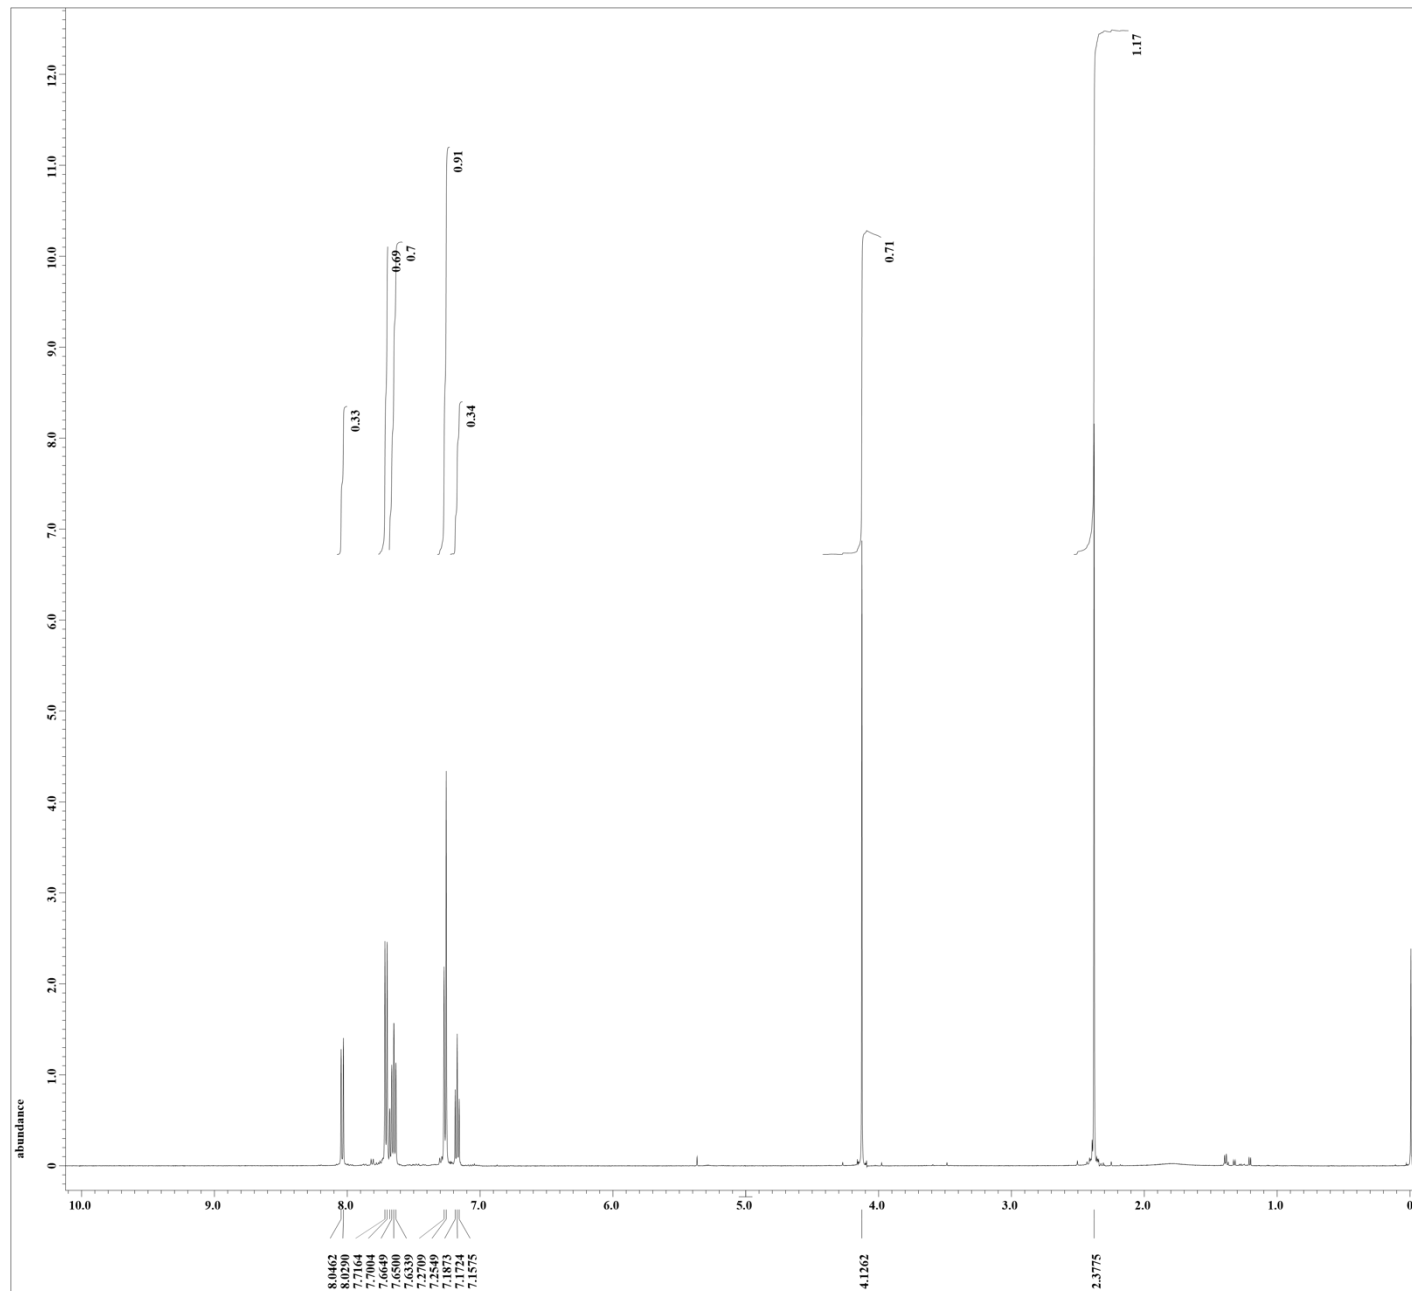

X : parts per Million : 1H

111



----- PROCESSING PARAMETERS -----  
dc balance : 0 : FALSE  
seXP : 2.0[Hz] : 0.0[s]  
trapezoid3 : 0[%] : 80[%] : 100[%]  
zeroFill : 1  
fft : 1 : TRUE : TRUE  
machinephase  
ppm  
Derived from: TA2020-0118-3.jdf

Filename = TA2020-0118-4.jdf  
Author = delta  
Experiment = single\_pulse\_dec  
Sample\_id = S8607359  
Solvent = CHLOROFORM-D  
Creation time = 4-APR-2000 20:21:09  
Revision time = 1-FEB-2020 17:32:36  
Current time = 1-FEB-2020 17:33:53  
Comment = single pulse decouple  
Data format = 1D COMPLEX  
Dim Title = 26214  
Dim Title = 13C  
Dim units = [ppm]  
Dimensions = X  
Site = ECA500  
Spectrometer = DELTA2\_NMR  
Field strength = 11.7473579[T] (500[MH  
X\_acq\_duration = 0.83361792[s]  
X\_domain = 13C  
X\_freq = 125.76529768[MHz]  
X\_offset = 100[ppm]  
X\_points = 32768  
X\_prescans = 4  
X\_resolution = 1.19959034[Hz]  
X\_sweep = 39.3081761[kHz]  
Irr\_domain = 1H  
Irr\_freq = 500.15991521[MHz]  
Irr\_offset = 5.0[ppm]  
Clipped = FALSE  
Mod\_return = 1  
Scans = 2125  
Total\_scans = 2125  
X\_90\_width = 12.8[us]  
X\_acq\_time = 0.83361792[s]  
X\_angle = 30[deg]  
X\_atn = 5.3[db]  
X\_pulse = 4.26666667[us]  
Irr\_atn\_dec = 21.09[db]  
Irr\_atn\_noe = 21.09[db]  
Irr\_noise = WALTE  
Decoupling = TRUE  
Initial\_wait = 1[s]  
Noe = TRUE  
Noe\_time = 2[s]  
Recvr\_gain = 56  
Relaxation\_delay = 2[s]  
Repetition\_time = 2.83361792[s]  
Temp\_get = 24.6[dc]

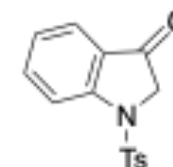

12

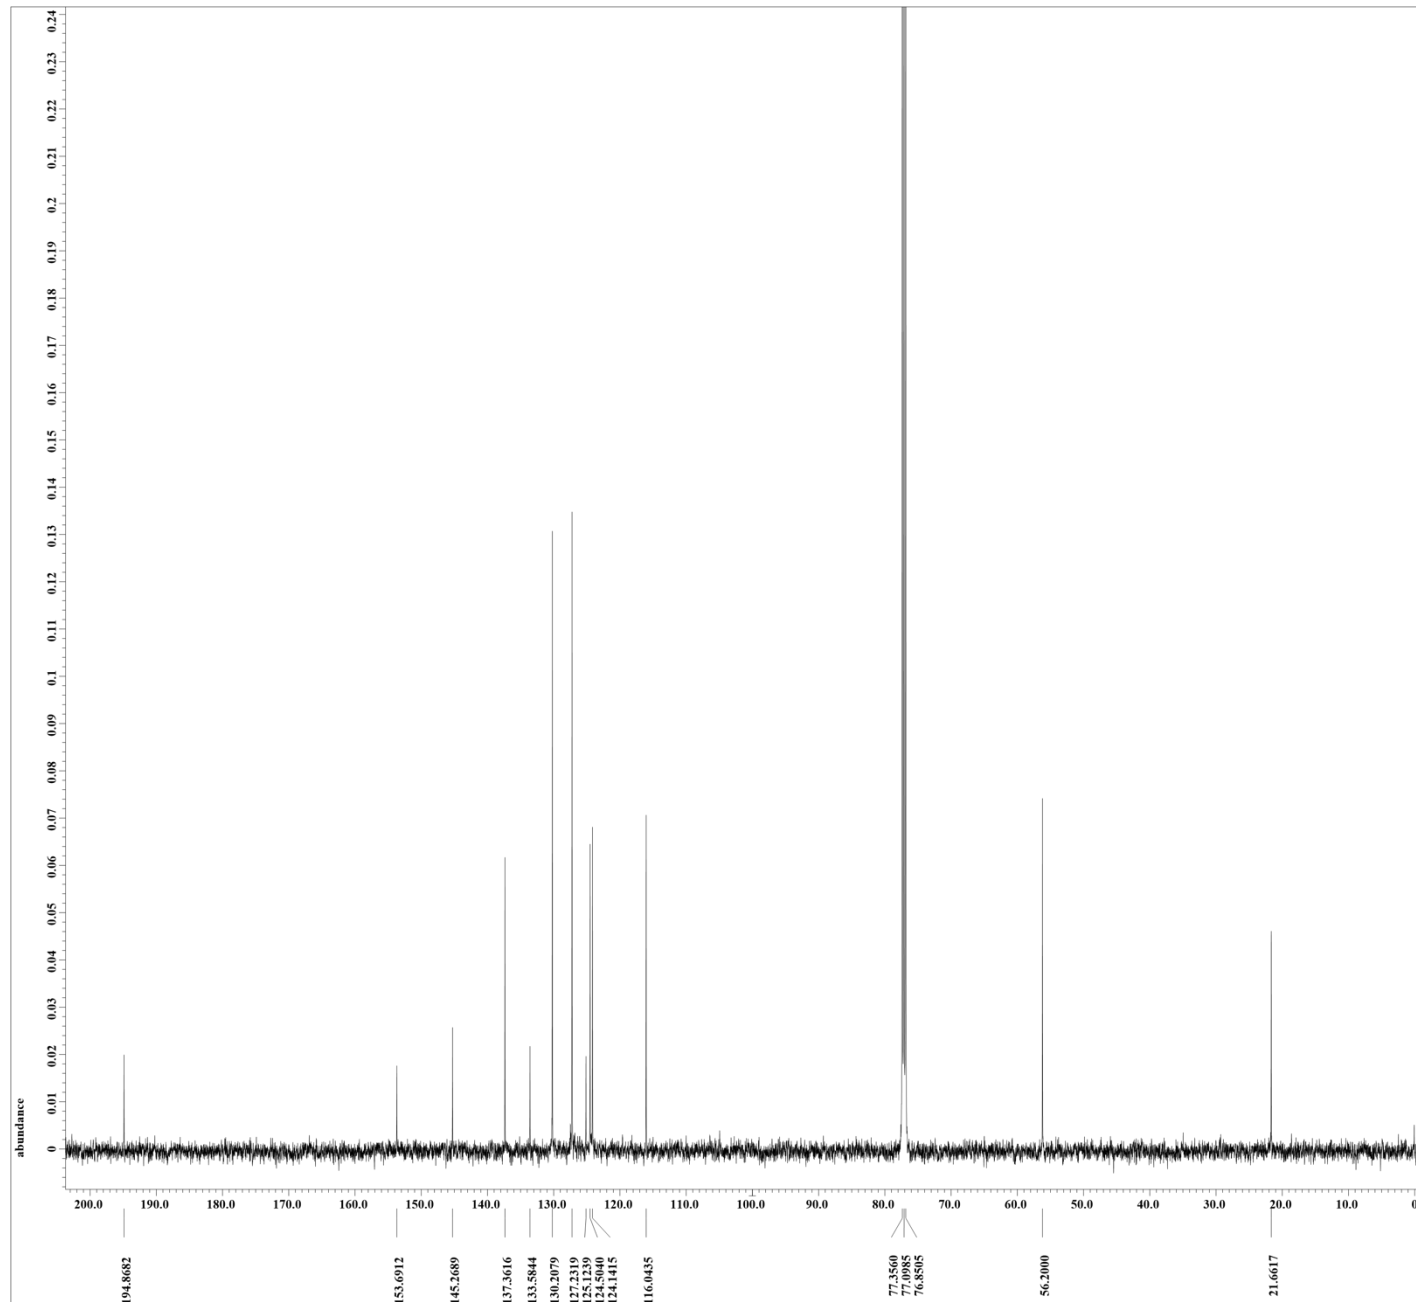

Supplement: d0cc01210f1.pdf [file d0cc01210f1.pdf]
